# Supplementary material for: The dynamics of smoking-related disturbed methylation: a two time-point study of methylation change in smokers, non-smokers and former smokers
Source: Springer Nature journal article supplement (doi:10.1186/s12864-017-4198-0), 2017-10-18

# Figure S4a

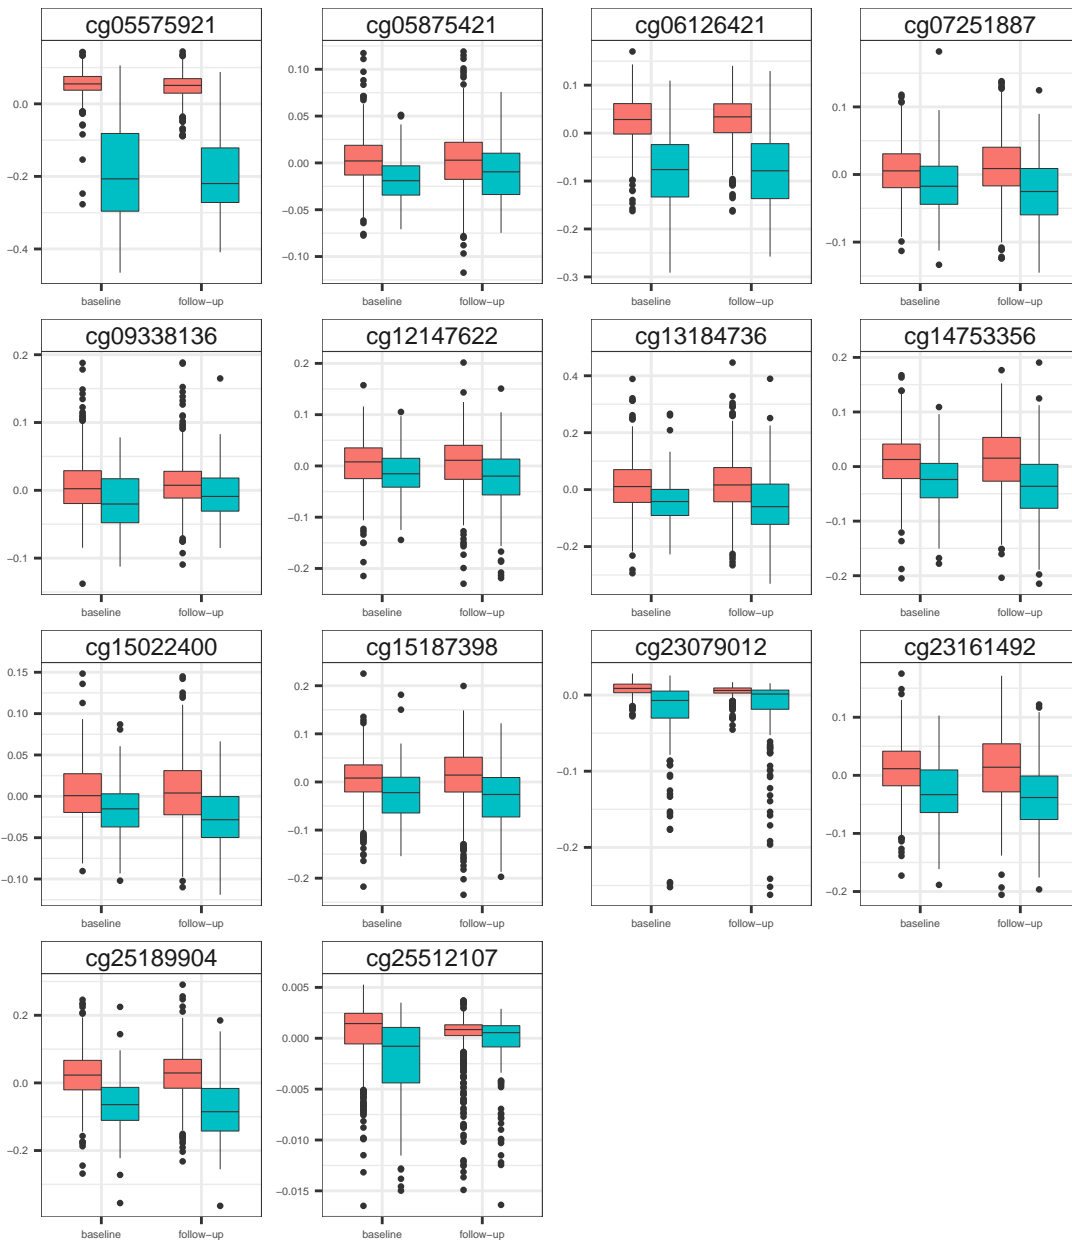

Smoking Category

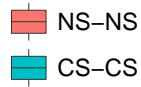

Technically adjusted methylation beta values

# Figure S4b

Confounder residualized methylation beta values

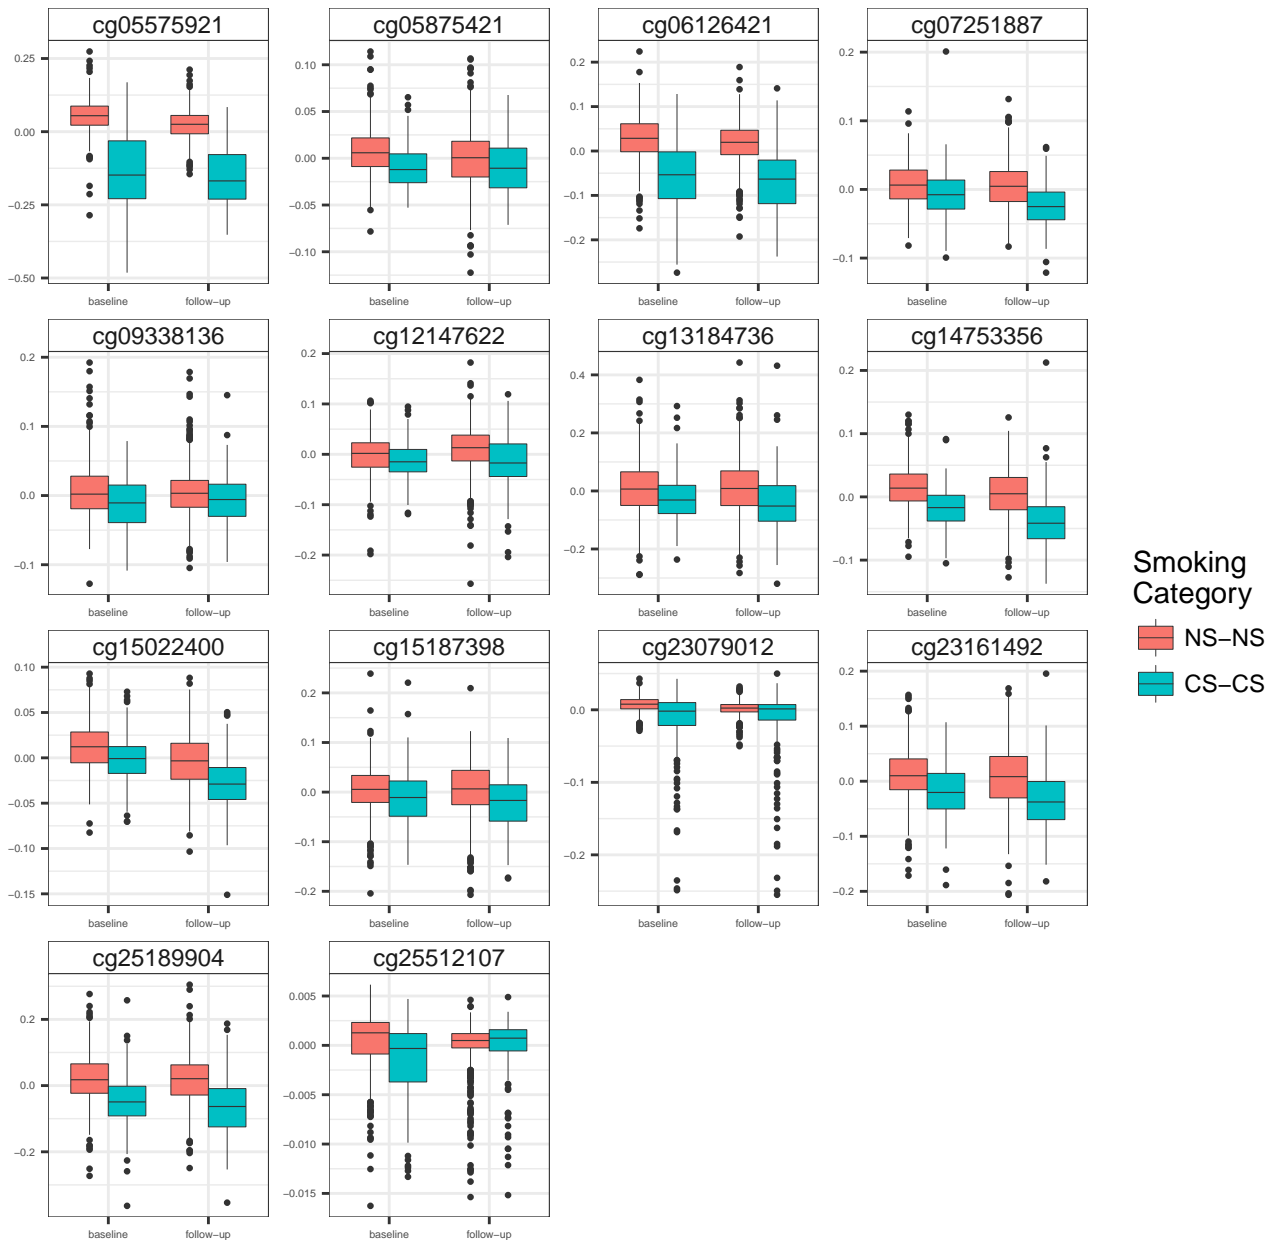

Supplement: MOESM11 [file 12864_2017_4198_MOESM11_ESM.pdf]
