# Supplementary material for: The dynamics of smoking-related disturbed methylation: a two time-point study of methylation change in smokers, non-smokers and former smokers
Source: BMC Genomics. 2017 Oct 18;18:805. doi: 10.1186/s12864-017-4198-0 (PMC6389045; doi:10.1186/s12864-017-4198-0)
Supplement: Supplementary file 4 — Results for the longitudinal time since quitting analysis. The first sheet: Presents the sites statistically significant for TSQL category 1 or TSQL category 2. The columns “Sign. for TSQL category 1” and “Sign. for TSQL category 2” indicate whether the CpG site is significant longitudinally (reference category individuals who have never smoked) for TSQL category 1 (>0–4 years since quitting smoking at the time of the follow-up) and for TSQL category 2 (5–14 years). In addition to the longitudinal coefficients and p-values (representing the rate of change of methylation between baseline and follow-up per year relative to never smokers), cross-sectional coefficients are also given (representing the methylation difference to never smokers at baseline). “Chromosome” is the chromosome of the CpG site and “Gene or region” is based on the annotation file provided by Illumina (HumanMethylation450 v1.2 Manifest File). The remaining sheets: Results for all 590 CpG sites for each TSQL category and for the time coefficient. (XLS 695 kb) [file 12864_2017_4198_MOESM4_ESM.xls]

## Sheet: significant results TSQL1 TSQL2
CpG Site	Sign. for TSQL category 1	Sign. for TSQL category 2	Cross-sectional coefficient for TSQL category 1	Longitudunal coefficient for TSQL category 1	Longitudunal p-value for TSQL category 1	Cross-sectional coefficient for TSQL category 2	Longitudunal coefficient for TSQL category 2	Longitudunal p-value for TSQL category 2	Chromosome	Gene or region
cg19940644		Yes	-0.179523	0.00525561	0.262751	-0.100523	0.0179591	5.21999e-05	1	1p36.22
cg27537125		Yes	-0.175001	0.00996926	0.00480478	-0.105624	0.0137743	4.16172e-05	1	1p36.11
cg16145216	Yes		0.231121	-0.021904	5.68682e-10	0.0439632	-0.00257997	0.43187	1	HIVEP3
cg24049493	Yes		0.370776	-0.0301781	3.94598e-07	0.0568974	-0.00512233	0.358267	1	HIVEP3
cg09662411	Yes		-0.277216	0.0225146	2.02782e-05	-0.14664	0.0151801	0.00241885	1	GFI1
cg18146737		Yes	-0.996278	0.0478628	0.00240436	-0.69805	0.0669843	5.61445e-06	1	GFI1
cg12876356	Yes		-0.469762	0.03308	8.45202e-09	-0.253027	0.0172456	0.00147061	1	GFI1
cg09935388	Yes		-0.500181	0.0243323	2.61199e-05	-0.36096	0.0185131	0.00067934	1	GFI1
cg09554443	Yes		0.12646	-0.0121802	4.35893e-05	0.0448515	0.00181174	0.517669	1	CD247
cg08709672	Yes		-0.17873	0.0207634	3.28004e-12	-0.0856446	0.0107614	0.000107572	1	AVPR1B
cg23079012	Yes	Yes	-0.755488	0.044248	7.93138e-06	-0.62135	0.0496978	1.08741e-07	2	2p25.1
cg08035323		Yes	0.291192	-0.00741916	0.0877991	0.234706	-0.0174782	2.09166e-05	2	2p25.1
cg24230340		Yes	-0.201369	0.00218336	0.585337	-0.141321	0.0161733	2.09817e-05	2	HTRA2
cg05951221		Yes	-0.587976	0.013269	0.000574491	-0.539411	0.0222873	1.02362e-09	2	2q37.1
cg21566642	Yes	Yes	-0.906126	0.028379	9.57657e-09	-0.686656	0.0301293	8.47558e-11	2	2q37.1
cg01940273	Yes		-0.560443	0.0271059	2.84995e-13	-0.380582	0.0135111	0.00010142	2	2q37.1
cg26718213	Yes		0.379039	-0.0204386	5.45294e-05	0.293911	-0.00793243	0.103247	2	SNED1
cg00501876	Yes		-0.145544	0.0195173	9.57406e-09	-0.026147	0.0012484	0.697377	3	CSRNP1
cg11554391		Yes	-0.198523	0.000707255	0.891367	-0.265952	0.0231427	2.22517e-06	5	AHRR
cg09338136		Yes	-0.168524	0.00739284	0.056439	-0.203821	0.0156934	2.29583e-05	5	AHRR
cg23576855	Yes	Yes	-0.89333	0.0428602	2.99459e-12	-0.493348	0.0306833	9.16672e-08	5	AHRR
cg05575921	Yes	Yes	-2.21339	0.12767	5.71752e-32	-1.46862	0.0920062	1.05698e-19	5	AHRR
cg26703534	Yes	Yes	-0.315061	0.0401735	3.61222e-39	-0.135146	0.0162696	8.18829e-09	5	AHRR
cg14817490	Yes	Yes	-0.437281	0.0358976	1.86799e-16	-0.268994	0.0277068	1.06673e-11	5	AHRR
cg25648203	Yes	Yes	-0.363704	0.0311382	5.64273e-12	-0.234013	0.0233472	3.56586e-08	5	AHRR
cg21161138	Yes	Yes	-0.399091	0.0168136	3.27408e-05	-0.25469	0.0195968	3.89617e-07	5	AHRR
cg26701785	Yes		0.300686	-0.0308378	1.55007e-05	0.267981	-0.0198402	0.00310545	6	SYNJ2
cg09022230	Yes		-0.16908	0.0164829	9.72506e-06	-0.0830067	0.00918482	0.00912667	7	TNRC18
cg16880946		Yes	-0.0749752	0.00239093	0.377222	-0.0879908	0.0100941	7.16118e-05	7	HOXA6
cg08396193	Yes		-0.131766	0.0244762	4.71586e-05	-0.0716261	0.0206412	0.000281375	7	HOXA7
cg19089201		Yes	0.513255	-0.0269899	0.00261457	0.410038	-0.0335064	7.45012e-05	7	MYO1G
cg22132788	Yes	Yes	0.878776	-0.0584055	1.13339e-09	0.700528	-0.0532093	2.39542e-09	7	MYO1G
cg12803068		Yes	0.556303	-0.0138387	0.0127425	0.411674	-0.0208698	6.72316e-05	7	MYO1G
cg25949550		Yes	-0.234918	0.0037859	0.354883	-0.257491	0.0190347	9.34256e-07	7	CNTNAP2
cg22539182	Yes		0.109919	-0.0120081	7.72348e-07	0.0688875	0.000358192	0.875924	10	10p15.3
cg25212025		Yes	-0.232461	0.00637289	0.0637247	-0.140109	0.0141258	1.19325e-05	10	PARD3
cg20684110		Yes	-0.204902	0.011361	0.00704494	-0.139136	0.018208	6.85321e-06	10	ADO
cg21611682		Yes	-0.185635	0.00834322	0.00125734	-0.0988251	0.0119418	1.19654e-06	11	LRP5
cg09578155		Yes	-0.0728485	0.00323653	0.162081	-0.0424191	0.00921783	2.67364e-05	11	LRP5
cg05875421	Yes		-0.172996	0.0244154	1.36732e-05	-0.107653	0.010307	0.0507572	14	GPR68
cg26242531	Yes		0.127163	-0.0125151	4.90256e-05	0.0478662	-0.0060217	0.0381486	14	ZFYVE21
cg13578465	Yes	Yes	0.223383	-0.021238	2.48999e-06	0.21922	-0.020187	1.76035e-06	14	INF2
cg01208318		Yes	-0.22897	0.0075862	0.104432	-0.199657	0.0188429	1.96915e-05	14	14q32.33
cg11824827	Yes		0.0990308	-0.0135396	6.2071e-05	0.043279	-0.00370492	0.244449	16	ZNF668
cg10380221	Yes		0.100469	-0.0177399	2.48494e-06	0.0487112	-0.00235763	0.50369	16	ZNF668
cg18758622	Yes		0.0619373	-0.0115256	8.11436e-05	0.0116303	5.27322e-05	0.984669	17	BAIAP2
cg00378510		Yes	-0.329047	0.00970994	0.047661	-0.255665	0.0187893	4.864e-05	19	LINGO3
cg14712058	Yes		-0.173821	0.0180823	5.44014e-05	-0.0677497	0.00560748	0.183979	19	SIN3B
cg03636183		Yes	-0.628436	0.0133218	0.00032522	-0.450405	0.0184464	1.59736e-07	19	F2RL3
cg15159987	Yes		-0.141046	0.0163069	1.28575e-07	-0.110315	0.0091088	0.00157522	19	CPAMD8
cg23973524	Yes		0.194725	-0.0147686	4.31705e-06	0.0749703	-0.011072	0.000250164	19	CRTC1
cg12303084		Yes	-0.169298	-0.00092586	0.771968	-0.104102	0.0145269	1.59258e-06	20	ZMYND8

## Sheet: all results TSQL1
CpG site	cross-sectional coefficient TSQL 1	longitudinal coefficient TSQL 1	cross-sectional coefficient SE TSQL 1	longitudinal coefficient SE TSQL 1	cross-sectional coefficient pvalue TSQL 1	longitudinal coefficient pvalue TSQL 1
cg05575921	-2.21339	0.12767	0.0913476	0.0105595	1.22646e-112	5.71752e-32
cg23079012	-0.755488	0.044248	0.0728855	0.00986507	1.4597e-24	7.93138e-06
cg06126421	-0.584122	-0.000161567	0.0497245	0.00449567	1.23502e-30	0.971337
cg25512107	-0.13	0.0204147	0.051155	0.0096132	0.011103	0.0338884
cg07251887	-0.116995	-0.0100294	0.0240491	0.00318555	1.23541e-06	0.00167889
cg14753356	-0.194996	0.00225969	0.0262906	0.00354514	1.75327e-13	0.523973
cg25189904	-0.438484	0.00355306	0.0562697	0.00488348	1.17759e-14	0.467009
cg15022400	-0.0953402	0.00179995	0.0301867	0.00379888	0.00161144	0.635715
cg15187398	-0.149054	-0.00624645	0.038615	0.0033509	0.00011794	0.0625321
cg05875421	-0.172996	0.0244154	0.0332083	0.00559295	2.05561e-07	1.36732e-05
cg13184736	-0.236203	-0.00315054	0.0769767	0.00663645	0.00218785	0.635059
cg23161492	-0.290045	0.00249978	0.0444052	0.00366041	8.76683e-11	0.494776
cg09338136	-0.168524	0.00739284	0.0320589	0.00387194	1.63436e-07	0.056439
cg12147622	-0.131982	0.000232809	0.0313478	0.00434189	2.66101e-05	0.957247
cg24540678	-0.150111	0.00164162	0.0284683	0.00371631	1.48943e-07	0.658754
cg07306253	0.0586588	-0.00343354	0.0220083	0.00382371	0.0077428	0.369373
cg15474579	-0.109134	-0.00651836	0.0278984	0.00349332	9.47893e-05	0.0622725
cg13399816	-0.13329	-0.00217781	0.0393992	0.00337792	0.000734431	0.519223
cg07202214	-0.0812204	-0.00168575	0.0307488	0.00357737	0.00832697	0.637559
cg10380221	0.100469	-0.0177399	0.0342328	0.00374977	0.00338015	2.48494e-06
cg25469474	-0.276431	0.0410955	0.0722722	0.0118955	0.000134243	0.000568583
cg23916896	-0.423091	-0.00286292	0.0647799	0.00828927	8.3047e-11	0.729866
cg04225775	0.156939	-0.0138142	0.0331354	0.0038663	2.34366e-06	0.000365781
cg04180046	0.206136	-0.0103684	0.0411861	0.00317937	6.23484e-07	0.00113844
cg01836137	0.104209	-0.0116351	0.0286357	0.00315179	0.000281396	0.000232195
cg18446336	-0.265893	-0.00564495	0.0510208	0.00403331	2.1277e-07	0.161876
cg05194346	0.205467	-0.00216993	0.0403545	0.00387365	3.95705e-07	0.575455
cg02257517	0.0759276	-0.0027044	0.0222358	0.00277168	0.000652003	0.329384
cg19827923	-0.117764	0.0128063	0.0200929	0.00338906	5.23045e-09	0.000164668
cg26856289	-0.0818886	0.00204583	0.0285423	0.00416007	0.00415746	0.622958
cg19717773	-0.451179	-0.0086475	0.0753275	0.00541544	2.62874e-09	0.110553
cg01439566	0.0627257	-0.00200083	0.0223002	0.00400148	0.00494968	0.617143
cg13578465	0.223383	-0.021238	0.0579354	0.00449006	0.00012019	2.48999e-06
cg26077378	-0.250256	0.0258177	0.0633699	0.00669833	8.15609e-05	0.000121657
cg03234777	-0.126407	0.0115366	0.040967	0.00519422	0.00206021	0.0265188
cg03440944	-0.13232	0.0122506	0.0302755	0.0053642	1.29024e-05	0.022545
cg03274391	0.57022	-0.00434858	0.0942598	0.00661311	1.8331e-09	0.51093
cg09717146	0.0737759	-0.0129618	0.0282188	0.00482531	0.00899288	0.00731737
cg08709672	-0.17873	0.0207634	0.0274883	0.00295301	1.02814e-10	3.28004e-12
cg19713851	-0.263083	0.00542972	0.0764542	0.00623995	0.000594571	0.384376
cg11621113	-0.0832694	-0.00182139	0.0269959	0.00333995	0.00206811	0.585617
cg24859433	-0.233766	-0.0039041	0.0351542	0.00511762	3.7059e-11	0.445675
cg25560398	-0.131514	0.00828585	0.0243052	0.00432818	6.86601e-08	0.0557818
cg04885881	-0.231463	-0.000527585	0.036573	0.00379682	3.14795e-10	0.889508
cg14624207	-0.122961	0.000203989	0.0209779	0.00306839	5.2986e-09	0.947005
cg03547355	-0.106967	0.00217388	0.0232431	0.00344241	4.42363e-06	0.527823
cg16815882	0.0632465	-0.0093662	0.0213185	0.00344508	0.00304041	0.00664106
cg03707168	-0.162602	-0.00555047	0.0326873	0.0043093	7.1041e-07	0.197967
cg21121843	-0.245936	0.00888557	0.0442373	0.00543619	3.08945e-08	0.102391
cg22117188	-0.0649705	0.00565469	0.0164763	0.00285916	8.26355e-05	0.0481656
cg02532700	-0.280513	0.0103298	0.045042	0.00443341	5.97617e-10	0.0199593
cg26242531	0.127163	-0.0125151	0.0236921	0.00307198	8.93846e-08	4.90256e-05
cg19888787	-0.157589	0.000760254	0.0683989	0.0126446	0.0213047	0.952065
cg24173182	0.141461	-0.00998429	0.0309786	0.00402451	5.27469e-06	0.0132362
cg20810975	0.068954	-0.00453542	0.0182074	0.00313254	0.000156069	0.147903
cg18503679	-0.593743	-0.0003999	0.246417	0.0341778	0.0160621	0.990666
cg16556677	-0.0973638	-0.00660139	0.0291463	0.00424204	0.000850735	0.119909
cg16145216	0.231121	-0.021904	0.0441986	0.00350696	1.93642e-07	5.68682e-10
cg21949830	-0.180576	0.02294	0.0464886	0.00695407	0.000105669	0.00099703
cg11229399	0.126776	-0.0117819	0.0413398	0.0047161	0.0021965	0.0126029
cg26701785	0.300686	-0.0308378	0.0845081	0.00710873	0.000384653	1.55007e-05
cg10841124	0.111716	-0.00234409	0.0433897	0.00626225	0.0100999	0.708227
cg19798735	-0.204387	0.0124609	0.0456448	0.00867535	7.87164e-06	0.15114
cg18404811	0.104695	-0.0089466	0.0261741	0.00407195	6.53923e-05	0.0281866
cg00871610	-0.171115	-0.00408287	0.0307625	0.00396046	3.02737e-08	0.302774
cg01899089	-0.165529	0.000592224	0.0268314	0.00349	8.3e-10	0.865279
cg19572487	-0.271784	0.00193392	0.0347426	0.00498297	8.04015e-15	0.697999
cg09716613	0.0958533	-0.00881313	0.0337793	0.00425426	0.00459231	0.0384984
cg18758622	0.0619373	-0.0115256	0.0195797	0.00291518	0.00158136	8.11436e-05
cg11730703	0.176049	-0.0175666	0.0511808	0.00479457	0.000596821	0.000258448
cg08375941	-0.222292	0.0315875	0.0550167	0.0109587	5.49047e-05	0.00397904
cg13418576	-0.0780335	0.00498917	0.0343763	0.00533198	0.0233027	0.349596
cg05284742	-0.173841	0.0100729	0.0210681	0.00339547	2.61201e-16	0.00306534
cg03329539	-0.303838	0.00908568	0.0300399	0.00410743	1.68957e-23	0.0271394
cg13185177	0.0728696	-0.00357392	0.037951	0.00479482	0.0549921	0.456181
cg09197783	-0.105513	0.00415977	0.0265961	0.00405381	7.50157e-05	0.305014
cg27310319	0.0924418	-0.0122298	0.0346909	0.00586334	0.00775666	0.0371906
cg10420527	-0.0698876	0.00605079	0.0179946	0.002285	0.000106282	0.00819246
cg07180646	-0.156511	-0.000940537	0.0365176	0.00297615	1.93132e-05	0.752034
cg09662411	-0.277216	0.0225146	0.0453704	0.00526369	1.21276e-09	2.02782e-05
cg04551776	-0.210997	0.0138678	0.0288781	0.00444865	3.7934e-13	0.00186483
cg10251229	0.0933778	-0.0110612	0.0241779	0.00356792	0.00011572	0.00197595
cg18092474	-0.191158	-0.0052858	0.0606679	0.00508842	0.00165822	0.299093
cg13247990	0.037919	0.00196644	0.0197645	0.00327833	0.0551631	0.548724
cg01832549	-0.0964158	0.00274677	0.0311611	0.00278478	0.00200794	0.324141
cg08884752	-0.0894575	0.00542425	0.0269812	0.00381514	0.000930266	0.155331
cg19713429	-0.133123	0.00222442	0.0346526	0.00374417	0.000126559	0.552546
cg27241845	-0.194554	0.00273694	0.032796	0.00398197	3.54794e-09	0.491995
cg02385153	0.113555	-0.00723714	0.0366897	0.00653591	0.00199002	0.268374
cg11660018	-0.215956	-0.00267199	0.0281295	0.00266701	2.77489e-14	0.316595
cg21486510	0.0995075	-0.00807718	0.0214805	0.00337519	3.81833e-06	0.0168498
cg16047567	-0.170634	0.00534635	0.0359682	0.00347019	2.27511e-06	0.123645
cg00310412	-0.150475	-0.00337707	0.025103	0.00235261	2.50922e-09	0.151397
cg05508862	0.0407827	-0.00815312	0.0214587	0.00235491	0.0575263	0.000553107
cg17372101	0.118784	-0.00221525	0.033413	0.003929	0.000387535	0.572973
cg19956914	0.128194	-0.00668974	0.0456444	0.00318738	0.00504147	0.0360235
cg06644428	-0.577782	-0.000784602	0.0805068	0.0110663	9.93359e-13	0.943488
cg01882991	-0.107485	-0.00795998	0.0297059	0.00342008	0.000304648	0.0200955
cg15693572	0.468439	-0.00104569	0.0780721	0.00550964	2.46819e-09	0.849501
cg21322436	-0.260223	0.00944236	0.0354269	0.00556223	2.8422e-13	0.0898215
cg17287155	-0.300372	-0.00358154	0.0455656	0.00695996	5.40138e-11	0.606925
cg05460226	-0.139554	0.0076154	0.0319583	0.00470975	1.3201e-05	0.106132
cg05183538	0.0784669	-0.0192575	0.0456892	0.00674146	0.0860484	0.00435032
cg06459104	-0.215191	-0.00935425	0.066483	0.00483235	0.00123519	0.0531137
cg23771366	-0.213342	-0.00580194	0.0315548	0.00293116	1.91115e-11	0.0479852
cg01429256	0.0387916	-0.00660715	0.013468	0.00227613	0.00400839	0.00376053
cg24389054	-0.0999138	0.00535732	0.0418407	0.00535558	0.0170367	0.317337
cg23067299	0.184654	-0.0221912	0.0679396	0.00993971	0.00662222	0.0257453
cg11902728	0.130997	-0.0109203	0.0235678	0.00346519	3.06046e-08	0.00166159
cg25212025	-0.232461	0.00637289	0.0379128	0.00343427	1.09177e-09	0.0637247
cg01873977	-0.0856652	-0.00308874	0.0442159	0.00569523	0.0528363	0.587678
cg04517079	-0.11259	0.000142028	0.0243462	0.00256738	4.03299e-06	0.955892
cg18335991	-0.110177	0.00340456	0.0241393	0.00372288	5.28485e-06	0.360625
cg01756424	0.0452655	-0.00392004	0.0148868	0.00222347	0.00238863	0.0781283
cg08472795	-0.0929694	0.00249932	0.0245953	0.00354781	0.00016115	0.481264
cg05824218	0.115624	-0.00931556	0.0168624	0.0027033	9.00299e-12	0.000587219
cg25730428	0.116876	-0.00826071	0.0284441	0.00329913	4.14942e-05	0.0124041
cg07826859	-0.138825	0.0115941	0.0200501	0.00325997	5.65561e-12	0.000389357
cg00689360	-0.186876	-0.00436547	0.0489649	0.00657768	0.000139408	0.507012
cg15212295	-0.132424	0.0125229	0.0298278	0.00506806	9.41572e-06	0.0136007
cg07339236	-0.253425	0.0146821	0.0535828	0.00934592	2.37716e-06	0.116431
cg19254163	-0.113846	-0.00531521	0.0238076	0.00305093	1.86578e-06	0.0817149
cg19918734	-0.0852568	0.0027685	0.0253378	0.00425628	0.000778086	0.515515
cg12076915	-0.119123	-0.00073465	0.0385024	0.00323172	0.00201002	0.820206
cg06595162	-0.0947724	-0.00159438	0.0260812	0.00337669	0.000286514	0.636882
cg15408734	-0.085456	0.00906734	0.0295232	0.00431792	0.0038353	0.0359252
cg04044720	0.135147	-0.00722952	0.0306806	0.00486031	1.10694e-05	0.137141
cg26707709	0.431142	-0.0184117	0.0898736	0.00702743	1.76497e-06	0.00889584
cg15342087	-0.300136	0.0162757	0.0348195	0.00495825	1.29578e-17	0.00105567
cg02980249	0.0657895	0.000207415	0.0248759	0.00269649	0.00825025	0.938699
cg24681208	0.0572919	0.000268318	0.020673	0.00323223	0.00562812	0.933854
cg03991871	-0.456009	0.00539483	0.0564293	0.00533162	1.22864e-15	0.311794
cg18642234	-0.112839	0.000169853	0.0203398	0.00268262	3.27993e-08	0.949524
cg13500388	-0.135463	0.00996741	0.0264538	0.00409748	3.30593e-07	0.0151258
cg19593285	-0.180512	0.0149218	0.0377555	0.00576368	1.85834e-06	0.00973614
cg04359840	-0.109832	-0.000879266	0.0314306	0.00363507	0.000486349	0.808908
cg00563932	0.0654371	-0.00789244	0.0218615	0.00279912	0.00279556	0.00488304
cg03999941	-0.119108	0.00428467	0.0414469	0.00605107	0.0040976	0.479022
cg03604011	0.48826	0.0237322	0.0926883	0.0131464	1.52172e-07	0.0712675
cg12075928	-0.227415	0.00858954	0.0400773	0.00663559	1.56393e-08	0.195735
cg10012530	-0.0835287	0.00309177	0.0263345	0.00415172	0.00153503	0.456589
cg14906103	0.0977712	-0.00658174	0.0270135	0.00426756	0.000301757	0.12325
cg13832201	-0.136432	0.00434187	0.0285996	0.00331835	1.98405e-06	0.190955
cg00541303	-0.111438	0.0007989	0.0320765	0.00428726	0.00052335	0.852205
cg13127741	-0.111207	-0.00250728	0.0275377	0.00329975	5.60236e-05	0.44749
cg23110422	-0.242008	0.0106332	0.0459375	0.00689128	1.51345e-07	0.123076
cg14012925	0.108816	-0.0125106	0.032092	0.00379971	0.000711702	0.0010195
cg17971600	0.0387503	-0.0055772	0.0132086	0.00225055	0.00338094	0.013331
cg21140898	-0.224457	0.01384	0.0670758	0.00859635	0.000834379	0.107644
cg20303561	-0.114489	0.00423032	0.0344024	0.0041398	0.000891903	0.307032
cg21393163	-0.202397	0.00868315	0.0509805	0.00549533	7.47415e-05	0.114327
cg01208318	-0.22897	0.0075862	0.0544476	0.0046688	2.75274e-05	0.104432
cg05673882	-0.179612	-0.00274645	0.0425626	0.00446093	2.57023e-05	0.538221
cg19372602	-0.0856803	0.00243378	0.0348837	0.00557278	0.0141155	0.662381
cg16276850	0.0832114	0.000858485	0.0200561	0.00344743	3.45531e-05	0.803384
cg26764244	-0.281292	0.0043432	0.0565098	0.00547745	7.09951e-07	0.427967
cg12758082	0.0297091	-0.0019855	0.017591	0.00264017	0.0913848	0.452164
cg15892280	-0.061555	-0.00167145	0.0164286	0.00249222	0.000183674	0.502551
cg23090529	-0.177312	0.00504485	0.0549836	0.00721379	0.00128147	0.484469
cg04039397	-0.169309	0.0168021	0.0590635	0.00803971	0.00419265	0.0368246
cg00116430	-0.16365	-0.00321124	0.0390889	0.00363244	2.98282e-05	0.376835
cg09109520	0.076868	-0.0114852	0.042265	0.00377812	0.0691396	0.00241299
cg26337070	-0.184497	-0.0108988	0.0591184	0.00521152	0.00183603	0.0366969
cg10807309	0.112307	-0.0111697	0.034432	0.00337984	0.00112974	0.000976261
cg12803068	0.556303	-0.0138387	0.0877392	0.00554809	3.05089e-10	0.0127425
cg12423733	0.253134	-0.0110119	0.0640403	0.00888345	7.98701e-05	0.215348
cg23351584	-0.112627	-0.00492446	0.0312816	0.00534321	0.000324077	0.356893
cg27598208	-0.113795	-0.00114842	0.0307591	0.00430921	0.000221519	0.789894
cg16834726	0.0739991	-0.00774024	0.0228676	0.00402829	0.00122853	0.0548953
cg25212453	-0.251928	0.0304743	0.0556511	0.00794566	6.32206e-06	0.000131469
cg22403782	-0.198425	0.00763674	0.0551901	0.00434114	0.000334205	0.078784
cg04521626	0.063411	-0.00800915	0.0192155	0.00283778	0.000982777	0.00484273
cg00808648	0.0642721	-0.00232724	0.0208981	0.0038735	0.00212376	0.548072
cg15159987	-0.141046	0.0163069	0.0213671	0.00307097	5.14955e-11	1.28575e-07
cg26282236	0.141447	-0.00694629	0.0378538	0.00316478	0.00019313	0.0283475
cg02743070	-0.0875702	0.00417634	0.0201362	0.00334201	1.42586e-05	0.211649
cg23480021	0.706251	-0.00925196	0.107997	0.0102274	8.20222e-11	0.365834
cg19427338	0.104028	-0.0160986	0.0340919	0.00432038	0.00230871	0.000202735
cg15600935	0.170938	-0.0219015	0.0419549	0.00741298	4.76013e-05	0.00318803
cg04039799	-0.0594145	0.00525484	0.0225516	0.00324582	0.00848478	0.105698
cg11263997	0.0998262	-0.0119039	0.044942	0.006146	0.0264446	0.0529759
cg02985540	-0.0877811	0.0106271	0.0276105	0.00304834	0.00150179	0.000506009
cg07123182	-0.344161	0.00179844	0.0713624	0.0111791	1.51047e-06	0.872216
cg23781467	0.0407299	0.00414477	0.0254441	0.00294109	0.109604	0.158999
cg00687135	-0.14245	0.000299243	0.0486259	0.00652873	0.00343251	0.963449
cg03188382	-0.102044	-0.000115885	0.0287444	0.0031105	0.000395373	0.970287
cg07626482	-0.0963373	-5.7439e-05	0.0247891	0.00264828	0.000105637	0.982699
cg08396193	-0.131766	0.0244762	0.0397414	0.00599475	0.000929353	4.71586e-05
cg01901332	-0.186611	0.00588735	0.0333374	0.00386896	2.50373e-08	0.128332
cg07967717	0.133461	-0.00515171	0.0260046	0.00329306	3.15244e-07	0.117966
cg01062937	0.045434	-0.00781989	0.0175308	0.00239136	0.0096199	0.0011035
cg02657160	-0.164089	-5.31333e-05	0.0353364	0.00614006	3.60407e-06	0.993097
cg12101586	-0.168744	-0.00883023	0.0663738	0.00606967	0.0111032	0.14596
cg06648759	0.09161	-0.00208707	0.0273272	0.00348147	0.000816601	0.548957
cg27286011	0.0929832	-0.00890655	0.0324536	0.0035022	0.00421803	0.0111002
cg17551891	-0.171686	-0.00720065	0.0554963	0.00521857	0.00201062	0.167887
cg02547394	0.133039	-0.011193	0.0427691	0.00720707	0.00188893	0.120653
cg05951221	-0.587976	0.013269	0.0414422	0.00384396	3.62347e-43	0.000574491
cg04704634	0.0980313	-0.0142644	0.0270699	0.00399931	0.000299703	0.000374493
cg03450842	-0.144699	0.00345825	0.0228447	0.00297038	2.94761e-10	0.244536
cg11436113	-0.0864827	0.00273066	0.0236587	0.0034761	0.000262888	0.432274
cg08266095	-0.171486	-0.00283357	0.0437798	0.0043814	9.3205e-05	0.517921
cg15417641	0.288984	-0.0226317	0.0688563	0.00633768	2.85149e-05	0.000368532
cg09701700	-0.124953	-0.000547754	0.0315799	0.00302612	7.92166e-05	0.856389
cg02375409	0.112807	-0.00748325	0.0366269	0.00372107	0.0021039	0.0445277
cg05906166	-0.217989	0.00502937	0.0667928	0.00491835	0.0011244	0.3067
cg03194226	-0.0849038	0.00433406	0.0316172	0.00505294	0.00729673	0.391197
cg26361535	-0.263576	0.00881708	0.0442729	0.00398946	3.21304e-09	0.027272
cg13543915	-0.0868376	0.00591972	0.0203883	0.00289888	2.14178e-05	0.041344
cg10592592	-0.0851823	0.000472681	0.0356274	0.00344529	0.0169171	0.890897
cg27178191	0.0617107	-0.00850771	0.0178981	0.00247816	0.000576273	0.00061546
cg11071448	-0.129621	0.00234876	0.0301697	0.00517848	1.80408e-05	0.650219
cg01692968	-0.235074	0.000947262	0.0400514	0.00593449	5.04484e-09	0.873205
cg00533649	-0.0792297	0.00251982	0.0284848	0.0023259	0.00547668	0.278844
cg09762515	0.0846094	-0.00469026	0.0305305	0.00498867	0.00562756	0.347298
cg04324758	-0.265915	0.0175512	0.0654183	0.00972729	4.97743e-05	0.0714077
cg24090911	-0.20585	0.00637364	0.0406788	0.00711165	4.49276e-07	0.370296
cg07178945	0.160314	-0.00923839	0.0352601	0.00300158	5.86439e-06	0.00212801
cg24230340	-0.201369	0.00218336	0.0433263	0.00400072	3.62775e-06	0.585337
cg18961281	0.0640351	-0.00686521	0.0228287	0.00373723	0.00507255	0.06644
cg25305703	-0.236271	-0.0112387	0.0484158	0.00605083	1.14821e-06	0.0634824
cg08595501	-0.109986	0.00380048	0.051076	0.00903094	0.0313852	0.673948
cg10919522	-0.145266	0.0145909	0.0348293	0.00529124	3.15192e-05	0.00590319
cg26703534	-0.315061	0.0401735	0.0217081	0.00296736	1.69222e-45	3.61222e-39
cg00893603	-0.241748	0.012597	0.0543152	0.00483263	9.14369e-06	0.00924725
cg23126342	0.190054	0.00298736	0.0549005	0.00620676	0.000549079	0.630378
cg01127300	-0.198081	-0.000278518	0.0385859	0.00288692	3.21142e-07	0.923157
cg20483374	0.0788095	-0.00552959	0.0202991	0.00323227	0.000106345	0.0873701
cg21611682	-0.185635	0.00834322	0.0212759	0.00258099	5.72809e-18	0.00125734
cg19719391	0.134563	-0.00673972	0.027703	0.00363537	1.28259e-06	0.0639755
cg00378510	-0.329047	0.00970994	0.0694242	0.00489844	2.34548e-06	0.047661
cg26540191	-0.220583	0.0351662	0.0703795	0.0101138	0.00174837	0.000526982
cg03636183	-0.628436	0.0133218	0.0380459	0.00369641	7.21483e-57	0.00032522
cg22851561	-0.131654	0.0149549	0.0246925	0.0042167	1.06306e-07	0.000404146
cg03220447	-0.0796835	0.0132987	0.0228434	0.00363096	0.000495331	0.000259698
cg27332104	0.125354	-0.0038138	0.0274156	0.00392962	5.10659e-06	0.331967
cg08038054	0.158815	-0.00070919	0.039844	0.00544362	6.95706e-05	0.896365
cg12876356	-0.469762	0.03308	0.0610713	0.005706	2.48824e-14	8.45202e-09
cg25013095	-0.177623	0.00666133	0.062991	0.0118913	0.0048422	0.575447
cg13787850	-0.130592	0.0106757	0.0366159	0.00420268	0.000371055	0.0111932
cg07090714	-0.141464	-0.00055155	0.0355121	0.00376281	7.06982e-05	0.883487
cg09247392	-0.0721507	0.0050976	0.0217457	0.00351538	0.00092085	0.147274
cg00295485	-0.153018	0.00750715	0.0311523	0.00418206	9.74068e-07	0.072869
cg12303084	-0.169298	-0.00092586	0.030474	0.00319414	3.20263e-08	0.771968
cg24838345	-0.178666	0.0069741	0.0549529	0.00887033	0.00116535	0.431875
cg00968616	0.0546597	-0.0010316	0.0206274	0.00309311	0.00811026	0.738798
cg15059804	0.12033	-0.00527968	0.0439461	0.00373947	0.0062484	0.158224
cg19838043	0.0950507	-0.00606294	0.030496	0.00321645	0.00185809	0.0596544
cg16219322	-0.0947468	-0.00510954	0.0273534	0.0050399	0.000541403	0.310855
cg23230929	0.045824	-0.000332873	0.0238284	0.00255845	0.0546311	0.896502
cg07954423	-0.153351	0.00380466	0.0392568	0.00520511	9.67797e-05	0.464942
cg05329352	-0.206068	0.00798267	0.0407941	0.00359078	4.88655e-07	0.026379
cg13074055	-0.242843	0.00985038	0.0740571	0.00940071	0.00106014	0.294916
cg02556928	-0.123049	0.00944327	0.0441031	0.00445133	0.00532908	0.0340699
cg21446172	-0.136847	0.000471818	0.0279051	0.00372149	1.01434e-06	0.899132
cg16116321	-0.080447	-7.80862e-05	0.0308275	0.00293877	0.0091461	0.978806
cg16178855	0.0953842	-0.00644291	0.0215799	0.00283987	1.03993e-05	0.023447
cg03004371	0.14108	-0.0024987	0.0521616	0.0045807	0.00691014	0.585514
cg09935388	-0.500181	0.0243323	0.0608769	0.00576593	4.20298e-16	2.61199e-05
cg19940644	-0.179523	0.00525561	0.0450726	0.00469086	7.08888e-05	0.262751
cg10691866	-0.153592	0.00408715	0.0439749	0.00366141	0.000491442	0.264508
cg27312979	0.254608	-0.0100757	0.0579538	0.00431024	1.19421e-05	0.0195583
cg11430077	-0.183388	0.0107714	0.0526377	0.00646382	0.000505219	0.0958689
cg12126344	-0.072993	0.00334493	0.0264572	0.00451171	0.00584495	0.458591
cg10062919	-0.0631824	0.00286418	0.0156141	0.00210911	5.39242e-05	0.174696
cg09465703	-0.309865	0.00678659	0.0723663	0.00763562	1.95495e-05	0.374272
cg26703507	-0.108062	0.00264987	0.0355605	0.00488459	0.002405	0.587569
cg12474798	-0.218098	0.00469902	0.0516523	0.00423923	2.5572e-05	0.267868
cg01272202	-0.0880406	0.0060977	0.0287363	0.00410142	0.00221347	0.137327
cg06819357	0.107075	-0.0124185	0.034015	0.00378398	0.0016719	0.00105855
cg07381806	-0.241279	0.00705022	0.055849	0.00861507	1.62894e-05	0.413306
cg24497361	-0.0751509	0.00430048	0.0245554	0.00292915	0.00224165	0.142301
cg08757670	0.056446	-0.00159875	0.0222535	0.00385412	0.0112582	0.678344
cg26669717	-0.0726521	0.00414798	0.0206473	0.0029746	0.00044281	0.163416
cg15542713	0.26656	-0.0201802	0.0637718	0.00618619	3.06764e-05	0.00113422
cg01218206	-0.0682391	-0.00221397	0.0330571	0.0055546	0.0390991	0.690266
cg01015663	-0.0639689	0.00248716	0.027344	0.00377053	0.0194091	0.509606
cg22100563	0.142954	-0.010787	0.0350857	0.00555818	4.77222e-05	0.0525065
cg24996979	-0.122277	0.00810521	0.0252863	0.00378531	1.41844e-06	0.0324385
cg22635676	0.744072	-0.0327113	0.173524	0.0127914	1.91711e-05	0.0106622
cg25197194	0.159204	-0.00563984	0.0370252	0.00438917	1.79743e-05	0.199038
cg16062877	-0.0647613	0.00253531	0.0179455	0.00295613	0.000314094	0.391247
cg00210249	0.117137	-0.00901364	0.0426862	0.00479015	0.00612747	0.0600985
cg27467282	0.135818	-0.0071268	0.0361868	0.00520099	0.000179236	0.170833
cg05677062	-0.0936243	-0.00365168	0.0369984	0.00401434	0.0114764	0.36317
cg15498134	-0.24468	0.0148448	0.0457692	0.00732083	9.88547e-08	0.0427898
cg09084391	-0.311952	-0.00414423	0.0688667	0.00831161	6.27086e-06	0.618139
cg03254067	0.0777732	-0.00932333	0.030241	0.00504923	0.0101773	0.0650453
cg11094248	-0.079759	0.00332105	0.0197743	0.00345195	5.66355e-05	0.336186
cg15963463	-0.129819	0.0102646	0.0254751	0.00375001	3.77556e-07	0.00628189
cg01763916	-0.0909689	0.00334315	0.0234776	0.0038222	0.000109688	0.381916
cg06321596	-0.137663	-0.00397204	0.0382277	0.00482166	0.000324807	0.410207
cg12513616	-0.122074	-0.00282285	0.026101	0.00294431	3.12936e-06	0.337867
cg11701312	-0.0748289	0.0016554	0.0184366	0.00224667	5.13587e-05	0.461361
cg04858631	-0.0982862	0.00697406	0.0360217	0.00636327	0.0064067	0.273285
cg11390978	-0.29606	0.0376006	0.0638581	0.0116333	3.72902e-06	0.00125901
cg27262054	-0.114578	0.00220528	0.0354301	0.00373429	0.00124394	0.554923
cg24688690	-0.0929812	0.00655801	0.0158139	0.00249377	4.71218e-09	0.00864442
cg06369322	-0.0582627	0.00216759	0.0196156	0.00287954	0.00300859	0.451731
cg04673446	0.0572385	2.43625e-05	0.0219352	0.00396192	0.00912297	0.995095
cg19325791	0.160084	-0.0162006	0.0331564	0.00549933	1.46618e-06	0.00327679
cg19744173	0.0730224	-0.00700447	0.0236854	0.00326568	0.00207636	0.0321464
cg07029024	0.0979568	-0.0157567	0.0348652	0.00474461	0.00500798	0.000921902
cg25317941	0.0515396	-0.000128201	0.0212473	0.00381035	0.0153491	0.973165
cg25727671	-0.0910401	0.0100882	0.0543364	0.00897625	0.09397	0.26127
cg26850624	0.144424	-0.000163071	0.0602154	0.00419822	0.016587	0.969022
cg13518625	-0.245375	-0.00459186	0.084738	0.0128638	0.00382028	0.721179
cg17566560	-0.0834994	0.00226184	0.0270814	0.00509211	0.00206918	0.656981
cg16611234	-0.221441	0.0125203	0.047403	0.00526518	3.21442e-06	0.0175522
cg16151538	0.0790387	-0.00747582	0.0251839	0.00450244	0.00171815	0.0970741
cg04368724	0.118648	-0.00171533	0.0426569	0.00485411	0.00546821	0.723863
cg14264316	-0.0979434	0.0118563	0.028685	0.00521809	0.000649244	0.0232403
cg26151910	-0.1566	0.0122915	0.0388007	0.00628488	5.61234e-05	0.0507124
cg26486070	-0.117323	2.78965e-05	0.0388018	0.00382197	0.00253559	0.994177
cg14254999	-0.146946	0.00986859	0.0458675	0.00834234	0.00137376	0.237044
cg00699986	0.0709435	-0.00347379	0.0280656	0.0046693	0.0115433	0.457031
cg06688763	0.217016	-0.0153029	0.0753514	0.00594348	0.00403095	0.0101414
cg15700587	0.0553609	-0.0086089	0.0296261	0.00539371	0.0617882	0.110711
cg03489965	0.172453	-0.00763858	0.0404115	0.00455088	2.08011e-05	0.0934907
cg07413467	0.105643	-0.00350658	0.0421299	0.00400471	0.0122517	0.3814
cg01731783	-0.053223	0.0029903	0.0155828	0.00264415	0.000647157	0.258298
cg06635952	0.0813294	-0.00392319	0.0253371	0.0033386	0.00134895	0.240167
cg17087741	-0.385873	0.0224827	0.0689563	0.0114624	2.45233e-08	0.0500466
cg20438687	-0.10931	0.00771296	0.0331591	0.00380086	0.000997733	0.0426347
cg07986378	-0.188334	0.00561105	0.0428451	0.00733605	1.15308e-05	0.444496
cg22356527	0.143196	-0.0129356	0.0307106	0.00556582	3.2841e-06	0.0202718
cg01839993	-0.092645	0.00183112	0.030212	0.00285997	0.0022012	0.522117
cg13020466	0.0889926	-0.00686315	0.0270065	0.0045261	0.000997709	0.129672
cg01951879	0.14728	0.00551822	0.0430906	0.00590226	0.000643373	0.349996
cg24931658	-0.109833	0.00135324	0.0255588	0.00313605	1.81706e-05	0.666169
cg16398761	-0.238496	0.0151401	0.0624071	0.0104253	0.000135957	0.146672
cg26196424	-0.109997	0.00653061	0.0365962	0.00542742	0.0026802	0.229094
cg14563949	0.0372038	-4.18613e-05	0.0196291	0.00308708	0.058175	0.989183
cg09554443	0.12646	-0.0121802	0.0305229	0.00296971	3.59788e-05	4.35893e-05
cg07069636	-0.104128	0.00389199	0.0212477	0.00254848	1.03813e-06	0.126961
cg09560590	0.158466	-0.0113091	0.0334631	0.00348485	2.36338e-06	0.00120325
cg04907244	-0.223374	0.00546795	0.0553619	0.00530608	5.71619e-05	0.302964
cg23576855	-0.89333	0.0428602	0.144796	0.00608377	8.99235e-10	2.99459e-12
cg16519923	-0.147939	0.0110256	0.0252524	0.00414775	5.33239e-09	0.00795499
cg04806562	0.055727	-0.00422301	0.0184604	0.00273715	0.00256781	0.123108
cg12619504	-0.144899	0.00500282	0.032628	0.00281752	9.57235e-06	0.0760284
cg09848445	-0.245313	0.021201	0.0625027	0.0112529	8.91274e-05	0.0597795
cg26477856	-0.0926762	0.00808225	0.0179129	0.00285683	2.49338e-07	0.00474019
cg24556382	-0.161206	0.00349445	0.0462354	0.00523205	0.000500938	0.504322
cg23401251	0.109621	-0.00458544	0.0272587	0.00421284	5.97421e-05	0.276601
cg19859270	-0.28938	0.00943075	0.0407491	0.00744982	1.59567e-12	0.205771
cg19459791	0.141066	8.27965e-05	0.0372083	0.0045669	0.000154569	0.985538
cg11231349	-0.187983	0.00897756	0.0527929	0.00740114	0.000378057	0.225349
cg03399898	-0.211329	0.00585695	0.0630961	0.00521771	0.000829437	0.261852
cg16255816	-0.0973214	0.00213377	0.0306609	0.00363797	0.00152745	0.557625
cg10874644	0.0875142	-0.0064611	0.0600178	0.00781147	0.144962	0.408313
cg17668731	0.0655542	-0.00303973	0.0190385	0.0033528	0.000584339	0.364773
cg14435720	-0.214571	0.00676733	0.0801289	0.0122243	0.00746473	0.579952
cg09658497	-0.504178	-0.00761271	0.0937661	0.00794745	8.71106e-08	0.338301
cg06885459	0.0793012	-0.00840139	0.0348234	0.00332036	0.022899	0.0115135
cg01207684	-0.195427	-0.00795117	0.0592933	0.00735003	0.000998904	0.279547
cg08606254	0.140041	-0.0107796	0.0514838	0.00743438	0.0065793	0.147307
cg00336149	0.177234	-0.0113953	0.048165	0.00339039	0.000241779	0.000798985
cg21473814	0.176048	-0.00933362	0.0354419	0.00410764	7.42559e-07	0.0232332
cg18146737	-0.996278	0.0478628	0.167375	0.0157384	3.2263e-09	0.00240436
cg02583484	-0.146854	0.0009975	0.0287089	0.00271923	3.50297e-07	0.713805
cg20357806	0.0799326	-0.00108609	0.0326478	0.00522566	0.0144265	0.835388
cg06972908	-0.114044	-0.00018063	0.0256476	0.00445973	9.11447e-06	0.967699
cg04701628	0.0428759	-0.0045927	0.018911	0.00327224	0.0234619	0.160695
cg26718213	0.379039	-0.0204386	0.0815068	0.00504746	3.61502e-06	5.45294e-05
cg16201146	-0.123429	0.00390432	0.0286408	0.00439666	1.70708e-05	0.374695
cg25748521	-0.072817	0.00709276	0.0234568	0.00390757	0.00192966	0.0697317
cg13193840	-0.225473	-0.000709201	0.0625401	0.011656	0.000317863	0.951492
cg20684110	-0.204902	0.011361	0.0448312	0.00420917	5.23379e-06	0.00704494
cg15806304	0.0933941	-0.0123865	0.0254373	0.00332888	0.000247487	0.000206964
cg26844633	-0.150681	0.00397604	0.0464485	0.00739545	0.00119534	0.590921
cg03348792	0.0568394	-0.00122003	0.0293012	0.00427965	0.0525303	0.775629
cg08035323	0.291192	-0.00741916	0.0477587	0.00434273	1.34743e-09	0.0877991
cg21188533	0.24911	-0.0039104	0.0837418	0.00650432	0.00297813	0.54781
cg23441210	0.0981171	-0.0091955	0.0283673	0.00521472	0.000551556	0.0780711
cg11557553	0.108895	-0.00377795	0.0223024	0.00396471	1.11298e-06	0.34082
cg13428066	0.0523997	-0.00679185	0.0239101	0.00385785	0.0285151	0.0785562
cg13937905	-0.216526	0.00831843	0.0566667	0.00678447	0.000137312	0.220387
cg22407942	-0.192224	0.000586777	0.0479479	0.00415836	6.37996e-05	0.887807
cg20295214	-0.161335	0.0211354	0.0344997	0.00584785	3.08102e-06	0.0003125
cg26364091	-0.0903905	0.00252315	0.0230503	0.00303864	9.0988e-05	0.406487
cg26963277	-0.398924	0.00131969	0.0591155	0.00676081	2.00598e-11	0.84527
cg10678215	0.117632	-0.00567008	0.0391327	0.00597148	0.00267675	0.342527
cg08972170	0.13221	-0.00647521	0.0383754	0.00530414	0.000582138	0.222387
cg10965178	-0.115898	0.00957387	0.0285097	0.00348656	4.9952e-05	0.00611636
cg01481251	-0.252899	0.0125984	0.0546482	0.00845172	3.90618e-06	0.136297
cg25949550	-0.234918	0.0037859	0.0347154	0.00409069	1.76259e-11	0.354883
cg14580211	-0.235597	0.0110145	0.0310656	0.00394403	5.16878e-14	0.00530301
cg19816811	-0.09206	0.00665556	0.0444966	0.00333136	0.038722	0.045941
cg24698211	-0.109734	0.00183952	0.0320528	0.00364942	0.000631963	0.614306
cg25921609	0.142095	-0.0103354	0.0368569	0.00497345	0.000119154	0.0378922
cg20305005	0.0897266	-0.0011464	0.0327084	0.00449326	0.00613675	0.798656
cg10592478	-0.169505	0.00488033	0.045085	0.00782502	0.000174123	0.532946
cg09975715	0.10234	0.000757546	0.0352958	0.00593523	0.0037718	0.898457
cg21869609	-0.422557	0.00975983	0.0940182	0.00540555	7.53844e-06	0.0712242
cg23842572	0.12414	-0.0100774	0.0281059	0.00430062	1.04962e-05	0.0192654
cg01744331	-0.327239	-0.0204779	0.0725433	0.0112847	6.78365e-06	0.0698045
cg16391678	-0.115802	0.0072276	0.0235843	0.0037712	9.74057e-07	0.0555218
cg08666707	-0.0566658	0.00464693	0.0206061	0.0032426	0.00600762	0.152073
cg22876908	-0.112432	0.00348068	0.0199022	0.00295514	1.83425e-08	0.239088
cg23594345	-0.199576	0.0104556	0.0552634	0.00566627	0.000313367	0.0652291
cg25292882	-0.149647	0.0052938	0.0437286	0.00777229	0.000631275	0.49592
cg14817490	-0.437281	0.0358976	0.0413438	0.00430386	2.24853e-25	1.86799e-16
cg26995224	-0.225314	0.00565099	0.0532157	0.00333374	2.43985e-05	0.090296
cg19089201	0.513255	-0.0269899	0.10563	0.00895029	1.29699e-06	0.00261457
cg02917867	-0.0845251	0.00434676	0.0249999	0.00328329	0.000736186	0.185767
cg10403394	0.266537	-0.000952072	0.0693437	0.00513629	0.000126227	0.852974
cg13038618	-0.199155	0.00979022	0.0347129	0.00523488	1.0941e-08	0.0616793
cg11225089	0.0950035	-0.0086449	0.0248819	0.00404415	0.000137944	0.0327305
cg10827488	0.118044	-0.00908606	0.0259166	0.003878	5.53337e-06	0.0192823
cg03660377	-0.197294	0.00871539	0.0507772	0.00767954	0.000105195	0.256633
cg10255761	-0.111035	0.00310563	0.0273245	0.0030494	5.0428e-05	0.308657
cg01097768	-0.10964	0.0134941	0.0254218	0.00475991	1.67345e-05	0.00465338
cg11666770	-0.312552	0.00587634	0.111674	0.00666487	0.00519763	0.378107
cg17333042	-0.055851	-0.000497296	0.0219629	0.00256284	0.0110728	0.846174
cg09469355	-0.0921917	0.004268	0.0241036	0.00287541	0.000135134	0.137965
cg18900812	-0.18192	-0.00256029	0.0501576	0.00856859	0.000292811	0.765141
cg18295744	-0.0759661	0.0047157	0.0215607	0.00367559	0.000434003	0.199725
cg02228160	0.149047	-0.0082201	0.0317318	0.00351763	2.84575e-06	0.0196006
cg26788216	-0.102703	0.00603603	0.03341	0.00446355	0.00214035	0.176514
cg11207515	0.254138	-0.00760228	0.0506203	0.00605909	5.64839e-07	0.209814
cg20066188	-0.18012	0.00622514	0.0480525	0.00321543	0.000184841	0.0530808
cg01294327	-0.354356	0.00897526	0.0683708	0.00425791	2.49337e-07	0.0352297
cg10750182	-0.104308	0.00737989	0.0161858	0.00253843	1.41272e-10	0.00370779
cg11145461	-0.0725794	0.000514149	0.0398284	0.00661684	0.0685346	0.938076
cg16880946	-0.0749752	0.00239093	0.0379639	0.00270673	0.0484611	0.377222
cg00871371	-0.0828156	0.0108931	0.0236357	0.00327603	0.000468381	0.000908485
cg08899667	0.124976	-0.00861395	0.0269337	0.00297213	3.74322e-06	0.00381784
cg11197630	-0.140012	0.0135176	0.049933	0.00911856	0.00508595	0.138465
cg26878655	-0.101177	0.00785913	0.029364	0.00539171	0.000579043	0.14518
cg08386009	-0.0657343	0.000625922	0.0172308	0.00281332	0.000139781	0.823972
cg09022230	-0.16908	0.0164829	0.0327773	0.00371167	2.76621e-07	9.72506e-06
cg22937882	0.0868912	-0.00122246	0.0273297	0.00462199	0.00149482	0.791446
cg03611151	0.150864	-0.00591015	0.0311408	0.00444658	1.36123e-06	0.184033
cg15636519	-0.0936063	-0.000162116	0.0449835	0.00763695	0.0375483	0.983067
cg13582060	-0.24098	0.00573156	0.0608906	0.00825078	7.83425e-05	0.48739
cg08947774	0.0727979	-0.00425541	0.0292132	0.00437562	0.0127777	0.330967
cg00324097	-0.065442	0.00357783	0.0176929	0.00261168	0.000222058	0.170946
cg00911794	0.209443	-0.00600296	0.0467785	0.00646091	7.97381e-06	0.353001
cg12806681	-0.348857	0.0205469	0.046616	0.00651685	1.06518e-13	0.00165385
cg20873136	0.0583007	-0.0055079	0.0253242	0.00421057	0.0214117	0.191065
cg14165660	0.128847	-0.00410061	0.0291354	0.00423984	1.02493e-05	0.33364
cg05517711	-0.0574145	0.00199419	0.0177003	0.00261192	0.00119783	0.445305
cg10179300	-0.109436	0.00466181	0.0418349	0.00562265	0.0089655	0.407191
cg06294803	-0.203526	0.00219982	0.0467911	0.00630845	1.43143e-05	0.727364
cg06151964	0.0941163	-0.0070992	0.0191412	0.00298477	9.42349e-07	0.0175289
cg06394460	-0.210388	0.00610271	0.052762	0.00774996	6.90082e-05	0.431161
cg06513247	-0.0620548	0.00617283	0.0163259	0.00256939	0.000147881	0.0164245
cg19406367	0.113002	-0.0019271	0.0426601	0.00453108	0.00814885	0.670684
cg03415545	-0.162024	-0.0169001	0.0550692	0.0085721	0.00329225	0.0488727
cg02101876	0.0996301	-0.00249164	0.0502908	0.00903792	0.0476913	0.782832
cg02556393	-0.0958051	0.00365453	0.0390792	0.00487126	0.0143128	0.453257
cg25421530	0.0772265	-0.0015735	0.0436786	0.00669282	0.0771865	0.814166
cg01435643	0.11211	-0.00469628	0.0553263	0.00504418	0.0428921	0.35201
cg17814814	0.0607253	-0.00203835	0.0219905	0.00338813	0.00580204	0.547533
cg02013841	-0.137506	0.00404891	0.0534712	0.00999393	0.0101798	0.685442
cg06949439	-0.0690338	0.00309689	0.0322084	0.00333404	0.0322248	0.353141
cg10520740	-0.113034	0.00725695	0.0180679	0.00282924	4.70795e-10	0.0104304
cg15482893	0.132905	-0.00267248	0.0357639	0.00529808	0.000207329	0.614047
cg02782510	0.0801879	-0.00976134	0.0314687	0.005178	0.0108916	0.0596269
cg14093127	-0.175343	-0.00414134	0.0483002	0.00600515	0.000290483	0.490547
cg26790897	0.0903176	0.00032278	0.030341	0.00448347	0.00294499	0.942618
cg01856529	-0.100834	0.00295617	0.0337167	0.00566193	0.00281267	0.60168
cg05529343	0.381018	-0.00569682	0.0812462	0.00866752	2.9525e-06	0.511132
cg02186444	0.112301	-0.00591443	0.0252759	0.00272915	9.4279e-06	0.0304059
cg14142087	0.0788046	-0.00533159	0.0232272	0.00274194	0.000706451	0.0520538
cg12547807	-0.120386	0.000434627	0.0216255	0.00269859	2.96135e-08	0.872073
cg10825315	0.088491	-0.00680424	0.0314636	0.00521071	0.00495649	0.191845
cg19589396	-0.108729	0.0017245	0.0348255	0.00430103	0.00182287	0.688524
cg08118908	0.140181	-0.0207536	0.0440433	0.00707502	0.00147807	0.00341149
cg00073090	-0.149535	0.00738999	0.0231152	0.00300163	1.23982e-10	0.0139447
cg01513913	-0.102187	0.00584961	0.030527	0.00268103	0.000834447	0.0292995
cg23973524	0.194725	-0.0147686	0.0365954	0.00320013	1.17833e-07	4.31705e-06
cg13976502	-0.0798046	0.00279284	0.0200944	0.00306259	7.36999e-05	0.361979
cg13525276	0.137745	-0.0146211	0.0414389	0.0056852	0.000902819	0.0102264
cg13039251	0.218751	0.00385611	0.0508311	0.00542741	1.77388e-05	0.477527
cg08149865	-0.141655	0.00934725	0.0266282	0.00299	1.16912e-07	0.00181022
cg25953130	-0.197866	0.00316794	0.050151	0.00626989	8.25319e-05	0.61346
cg00501876	-0.145544	0.0195173	0.0211185	0.00337912	7.0864e-12	9.57406e-09
cg05969150	0.0782434	-0.00609409	0.018965	0.00226509	3.86186e-05	0.0072289
cg00976097	0.354825	0.00153462	0.168037	0.0108631	0.0348908	0.887679
cg23565821	-0.122031	0.00176076	0.0275232	0.00381811	9.74608e-06	0.644761
cg21161138	-0.399091	0.0168136	0.0297461	0.00403395	2.16817e-39	3.27408e-05
cg17619755	0.152973	-0.0112742	0.046158	0.00412864	0.000939728	0.00640429
cg11152412	-0.118594	0.0115696	0.0328934	0.00554001	0.000317978	0.0369554
cg16936060	0.0629965	-0.00331799	0.0294721	0.00372333	0.0326831	0.373019
cg14712058	-0.173821	0.0180823	0.0340593	0.0044656	3.65311e-07	5.44014e-05
cg24693803	0.125652	-0.00764295	0.0301669	0.00292919	3.2687e-05	0.00917707
cg12406027	-0.0998445	-0.0012683	0.0239125	0.00254027	3.12141e-05	0.617668
cg17038235	0.0669822	-0.00672689	0.0268398	0.00315649	0.0126601	0.0332651
cg16503724	0.0789402	-0.00500936	0.023544	0.00343344	0.000813698	0.144806
cg26060489	0.0905486	-0.0145108	0.0212724	0.00371722	2.1532e-05	9.9628e-05
cg09607043	0.130216	-0.0137052	0.03914	0.00607586	0.000892111	0.0242556
cg12873476	-0.194643	0.00508775	0.0390314	0.0032415	6.81792e-07	0.11676
cg00085013	0.0522456	0.00116861	0.0240858	0.00360155	0.0301793	0.745631
cg26529655	-0.0710181	0.00525627	0.0229409	0.00384471	0.00198629	0.171818
cg19211853	-0.267279	-0.0172109	0.120096	0.0165831	0.0261529	0.29953
cg02451831	-0.13702	0.00529596	0.0280931	0.00423221	1.15328e-06	0.211033
cg06235438	-0.135876	0.00860298	0.0274749	0.00489364	8.10252e-07	0.0789833
cg02775417	-0.178452	0.0151066	0.0692342	0.0125083	0.0100082	0.227368
cg20059928	-0.212966	0.0119927	0.0448907	0.00330666	2.29235e-06	0.000297992
cg10951873	-0.0973311	0.0023384	0.0337913	0.00533159	0.00400906	0.661028
cg25809905	0.135369	-0.0100565	0.0438908	0.00362954	0.00207667	0.00567356
cg16969872	-0.145798	0.00437225	0.0382453	0.00438483	0.00014232	0.318884
cg19046189	0.0723819	-0.00616423	0.0173365	0.00264914	3.09308e-05	0.0201223
cg23667432	-0.105722	0.00547548	0.0206076	0.00362449	3.12415e-07	0.131113
cg01005506	-0.144791	0.00622522	0.0328795	0.00284602	1.13525e-05	0.0288931
cg14074174	-0.0946771	0.000206882	0.0216475	0.00229971	1.2946e-05	0.928333
cg04956244	0.0850838	-0.00765581	0.0164175	0.00259894	2.38124e-07	0.00327897
cg03345925	0.0626009	-0.00594511	0.0275448	0.00359285	0.0231515	0.098222
cg27537125	-0.175001	0.00996926	0.0238008	0.00352935	2.73462e-13	0.00480478
cg20902353	-0.0642334	0.00362275	0.0182808	0.00270287	0.000450983	0.18037
cg13784312	-0.201104	-0.0322893	0.136189	0.024697	0.139892	0.191299
cg11902777	-0.400877	0.00949983	0.0621679	0.00631587	1.46856e-10	0.132791
cg21747070	-0.122174	0.00966512	0.0351124	0.00312518	0.000515831	0.00202605
cg17024919	-0.371096	-0.000453023	0.0718255	0.00529201	2.70071e-07	0.931794
cg21566642	-0.906126	0.028379	0.052902	0.0049133	1.42658e-60	9.57657e-09
cg08763102	-0.0628849	0.00743205	0.0220349	0.00360562	0.00435677	0.0394773
cg18754985	-0.127586	-0.00641286	0.0482386	0.0093716	0.00822106	0.493914
cg22132788	0.878776	-0.0584055	0.12488	0.00951747	2.95566e-12	1.13339e-09
cg03646329	-0.177587	-0.0124588	0.0619226	0.00945921	0.00417188	0.18803
cg14120703	-0.0581631	0.00558156	0.0166922	0.00277125	0.000502087	0.0442028
cg02336104	-0.139418	-0.000557509	0.0339657	0.00314575	4.24848e-05	0.859359
cg04813697	-0.157121	0.00683571	0.0382412	0.00452833	4.15297e-05	0.131403
cg03519879	-0.0799532	0.0024473	0.0184653	0.00266101	1.56131e-05	0.357908
cg27449150	-0.0785152	0.000810808	0.0314134	0.00481556	0.012511	0.866316
cg04573702	-0.0568538	-0.000782441	0.0231557	0.00326084	0.0141583	0.810406
cg07465627	-0.121538	0.0102655	0.0244797	0.00391434	7.37955e-07	0.00882965
cg04970434	0.0797711	-0.00448725	0.0283865	0.00367127	0.00500048	0.22183
cg04383058	-0.0964698	0.00785749	0.0298293	0.00457813	0.0012384	0.0863448
cg16702313	-0.0793396	0.00522725	0.0193537	0.00351225	4.27244e-05	0.136915
cg23198793	0.118553	-0.00758735	0.0320923	0.0043659	0.00022649	0.0824705
cg09578155	-0.0728485	0.00323653	0.0156954	0.00231364	3.66725e-06	0.162081
cg10788371	-0.107526	2.77988e-05	0.0308463	0.00272047	0.000503822	0.991849
cg20103692	0.056397	0.00426383	0.03747	0.00656672	0.132422	0.516255
cg24741609	-0.0803167	0.0104963	0.0300222	0.00309999	0.00753789	0.000730903
cg22539182	0.109919	-0.0120081	0.025084	0.00241792	1.24912e-05	7.72348e-07
cg12836863	0.0815721	-0.00704346	0.0251542	0.00447231	0.00119889	0.11552
cg14977938	0.151044	-0.00811774	0.0319331	0.00351492	2.42195e-06	0.0210699
cg06433467	-0.247759	-0.00609645	0.0655271	0.00774887	0.000161119	0.431568
cg18991417	0.0732948	-0.000128191	0.029261	0.00388586	0.0123289	0.973688
cg05957567	0.0772365	-0.00782253	0.0224515	0.00304633	0.000593215	0.0103453
cg02035751	-0.0597843	0.00498612	0.0204574	0.00304331	0.00350954	0.101585
cg19847577	0.0764748	-0.0127123	0.0344214	0.00330476	0.0264367	0.000125529
cg01442064	-0.114315	-0.00025565	0.0239053	0.00354225	1.85173e-06	0.942476
cg15087369	0.0986312	-0.0188991	0.0335671	0.00515214	0.00333344	0.000254037
cg16983588	0.155309	-0.0144756	0.0432763	0.0042687	0.000341761	0.000716811
cg14179389	-0.215818	-0.0051415	0.0612796	0.00613863	0.000439995	0.40243
cg04258133	0.218036	-0.0158562	0.0401885	0.00481716	6.53621e-08	0.00102266
cg09099830	-0.176079	0.010846	0.0302934	0.00293865	7.37028e-09	0.000232806
cg24719910	-0.113843	-0.00552361	0.0463834	0.00880484	0.0141779	0.530546
cg04018738	0.264814	-0.0109061	0.0732801	0.00632884	0.000311162	0.0850828
cg19825437	-0.095225	3.05795e-05	0.0308652	0.00366412	0.00206424	0.993342
cg09570614	0.0641029	-0.00401424	0.0240409	0.00266101	0.00773568	0.131657
cg24158160	0.066481	-0.00772581	0.0274619	0.00482294	0.015556	0.109419
cg21913886	-0.205707	0.00185578	0.0429101	0.00494249	1.768e-06	0.707369
cg00835193	-0.181695	0.00889517	0.0484367	0.00553897	0.000181527	0.108532
cg23673974	0.0690734	-0.00775554	0.0226632	0.00398164	0.00232948	0.0516498
cg01668352	-0.114816	0.0128268	0.0332662	0.00654525	0.000566565	0.0502409
cg11253886	0.113433	-0.00635149	0.0353319	0.0032059	0.00135098	0.0477791
cg18316974	-0.626027	0.0326411	0.121345	0.0138094	2.75601e-07	0.0182429
cg18625627	0.146126	-0.0196383	0.0431288	0.00601313	0.000716824	0.00111943
cg07063068	-0.159816	-0.0101692	0.0623082	0.00998845	0.010382	0.308818
cg26271591	-0.235846	0.0142136	0.0465927	0.00726069	4.48865e-07	0.0504884
cg10814005	-0.175514	-0.00622942	0.0396344	0.00550805	9.99282e-06	0.258276
cg24049493	0.370776	-0.0301781	0.0774508	0.00592034	1.85383e-06	3.94598e-07
cg03316752	-0.118757	0.0231109	0.0471295	0.00799654	0.0118072	0.00391436
cg05302489	0.119507	-0.00246475	0.0463474	0.0053099	0.0100022	0.642598
cg12729894	-0.067862	0.00126443	0.0240335	0.00344365	0.00479289	0.713546
cg03957124	-0.0376267	0.00267121	0.0216691	0.0035731	0.0826199	0.454844
cg11824827	0.0990308	-0.0135396	0.0275768	0.00336978	0.00033772	6.2071e-05
cg14089503	-0.127317	0.0108431	0.0382164	0.00464826	0.000880654	0.019817
cg19925780	0.180544	0.000259904	0.0431898	0.00617303	3.0303e-05	0.966423
cg01017464	-0.166366	0.0158433	0.0413792	0.00498066	6.03681e-05	0.00150219
cg22845855	-0.0880631	0.0129779	0.0434925	0.00623662	0.043014	0.0376349
cg22870429	-0.0846408	0.00793253	0.0265458	0.00380032	0.00145109	0.0370512
cg03109660	-0.0626354	-0.000545477	0.024933	0.00409831	0.0120659	0.894136
cg17924476	0.196035	-0.00405289	0.0433655	0.00391464	6.61683e-06	0.300713
cg22891595	0.01675	-0.00238384	0.0242974	0.00313489	0.490669	0.447139
cg01940273	-0.560443	0.0271059	0.0353707	0.00367395	7.0045e-53	2.84995e-13
cg04716530	-0.125389	0.00421636	0.029679	0.00474995	2.48457e-05	0.37489
cg11554391	-0.198523	0.000707255	0.0390188	0.00517751	3.96058e-07	0.891367
cg23233742	-0.0764575	-0.0022615	0.0304453	0.00323527	0.0121182	0.484666
cg25648203	-0.363704	0.0311382	0.0335736	0.00447832	1.27902e-26	5.64273e-12
cg14675361	0.115458	0.00455222	0.0474098	0.00655577	0.0149626	0.487565
cg23219570	0.103676	-0.00222235	0.0307432	0.00367334	0.000760585	0.545288
cg22998476	-0.103398	0.00113177	0.0274668	0.00336574	0.000172088	0.736729
cg27405731	0.10672	-0.0144801	0.0332586	0.00420352	0.00135491	0.000589967
cg11690578	-0.0901268	-0.000243789	0.0358976	0.00501774	0.0121258	0.961257
cg20244340	-0.239492	-0.000586862	0.0410378	0.0031862	6.51462e-09	0.853894

## Sheet: all results TSQL2
CpG site	cross-sectional coefficient TSQL 2	longitudinal coefficient TSQL 2	cross-sectional coefficient SE TSQL 2	longitudinal coefficient SE TSQL 2	cross-sectional coefficient pvalue TSQL 2	longitudinal coefficient pvalue TSQL 2
cg05575921	-1.46862	0.0920062	0.0878357	0.00996568	2.10554e-58	1.05698e-19
cg23079012	-0.62135	0.0496978	0.0697795	0.00930315	1.17862e-18	1.08741e-07
cg06126421	-0.530263	0.00574177	0.0479751	0.00423639	2.08024e-27	0.175544
cg25512107	-0.0623727	0.00606165	0.0486698	0.00913912	0.200117	0.507277
cg07251887	-0.104241	0.000855382	0.0230777	0.00300899	6.64767e-06	0.776245
cg14753356	-0.205626	0.000560658	0.0252236	0.00334918	6.25355e-16	0.86708
cg25189904	-0.328684	0.0140169	0.0544268	0.00464756	1.93325e-09	0.00261154
cg15022400	-0.0806543	0.00505786	0.0289899	0.00356791	0.00545414	0.15655
cg15187398	-0.0792483	0.0122918	0.0372742	0.00315699	0.0336535	0.000103894
cg05875421	-0.107653	0.010307	0.0317933	0.00527126	0.000720607	0.0507572
cg13184736	-0.287427	0.00934213	0.0741474	0.00624124	0.000110455	0.134687
cg23161492	-0.230818	0.0134077	0.0428922	0.00346513	8.54368e-08	0.000114564
cg09338136	-0.203821	0.0156934	0.0309145	0.00369296	5.60582e-11	2.29583e-05
cg12147622	-0.090425	0.00436034	0.0300671	0.00410271	0.00266701	0.288076
cg24540678	-0.171885	0.0089044	0.027328	0.00351017	3.91914e-10	0.0113055
cg07306253	0.0155181	-0.00333329	0.021187	0.00366097	0.463975	0.362728
cg15474579	-0.170955	0.00844388	0.0267963	0.00329876	2.22634e-10	0.0105889
cg13399816	-0.118184	0.00368574	0.0380384	0.00318229	0.00192473	0.246996
cg07202214	-0.0760501	0.00730236	0.0295662	0.00335686	0.0101863	0.0297881
cg10380221	0.0487112	-0.00235763	0.0328593	0.0035247	0.138414	0.50369
cg25469474	-0.141614	0.0424734	0.0699284	0.0113481	0.0429666	0.000189858
cg23916896	-0.365891	0.0158304	0.0623871	0.00788584	5.28011e-09	0.0449088
cg04225775	0.0326529	-0.00666593	0.031857	0.00364906	0.305509	0.067967
cg04180046	0.130377	-0.00499734	0.0397506	0.00297635	0.00106256	0.0933923
cg01836137	0.0513857	-0.00218936	0.027693	0.0030112	0.0636853	0.467314
cg18446336	-0.175518	0.00484163	0.0493065	0.00379789	0.000382756	0.202601
cg05194346	0.00900002	0.00275775	0.0389027	0.00365174	0.817075	0.450275
cg02257517	0.026335	-0.00323117	0.0213601	0.00263195	0.217765	0.219796
cg19827923	-0.0741202	0.00539637	0.0192335	0.00320668	0.000119402	0.0926421
cg26856289	-0.0717422	0.00167257	0.0272298	0.00389024	0.00848292	0.667311
cg19717773	-0.241035	0.00746661	0.0727452	0.00511685	0.00094412	0.144753
cg01439566	0.00948677	0.00476248	0.0212042	0.00377324	0.654624	0.207114
cg13578465	0.21922	-0.020187	0.0560049	0.00420439	9.47464e-05	1.76035e-06
cg26077378	-0.197767	0.0131821	0.0610109	0.00631832	0.00121202	0.0371433
cg03234777	-0.054003	0.00464228	0.0393419	0.0049053	0.17002	0.344131
cg03440944	-0.0657227	0.00870787	0.0291455	0.00509395	0.0242205	0.0876043
cg03274391	0.393991	-0.00450452	0.0913289	0.00625538	1.70993e-05	0.471591
cg09717146	0.0270133	-0.000466869	0.0270137	0.00456586	0.317418	0.918572
cg08709672	-0.0856446	0.0107614	0.026369	0.00277011	0.00118498	0.000107572
cg19713851	-0.292932	-0.0122912	0.0737868	0.00588627	7.51866e-05	0.0369829
cg11621113	-0.0597912	0.00780764	0.0259325	0.00315346	0.0212394	0.0134177
cg24859433	-0.22534	0.002316	0.0333706	0.00480907	1.87046e-11	0.630179
cg25560398	-0.120902	0.00420491	0.0228565	0.00404216	1.33306e-07	0.298411
cg04885881	-0.180681	0.00937114	0.0352202	0.00358087	3.23377e-07	0.00897465
cg14624207	-0.0735077	0.00428967	0.0201094	0.00290047	0.000263045	0.139397
cg03547355	-0.0947715	0.00936879	0.0222789	0.00323964	2.1913e-05	0.00389249
cg16815882	0.0209771	0.000962228	0.0204106	0.00327004	0.304174	0.76861
cg03707168	-0.169972	0.00373347	0.0313733	0.00407053	6.7813e-08	0.359211
cg21121843	-0.159427	-0.000398783	0.0424983	0.00513247	0.000181257	0.93808
cg22117188	-0.0281288	0.0027737	0.0157708	0.00269049	0.0746129	0.302768
cg02532700	-0.206618	0.0064041	0.0434073	0.0041798	2.10774e-06	0.125732
cg26242531	0.0478662	-0.0060217	0.0227446	0.00290147	0.0354633	0.0381486
cg19888787	-0.100761	0.0138774	0.0654566	0.0120395	0.123842	0.249261
cg24173182	0.048284	-0.00552263	0.0297488	0.00384563	0.104744	0.15123
cg20810975	0.0153051	0.00265424	0.0175129	0.00297425	0.382241	0.372341
cg18503679	-0.475147	0.00754911	0.2364	0.0319919	0.0445722	0.813494
cg16556677	-0.100326	-0.00310159	0.0281905	0.00402255	0.000380673	0.440818
cg16145216	0.0439632	-0.00257997	0.0427121	0.0032814	0.303508	0.43187
cg21949830	-0.0588345	0.0101865	0.0445067	0.00655761	0.186332	0.120577
cg11229399	0.144047	-0.00784452	0.0397553	0.0044504	0.000299006	0.0781939
cg26701785	0.267981	-0.0198402	0.081456	0.00669652	0.00102501	0.00310545
cg10841124	0.257159	-0.0142808	0.041596	0.00591926	7.57146e-10	0.0159783
cg19798735	-0.131602	0.00865338	0.0436792	0.00821373	0.00261262	0.292294
cg18404811	0.0437898	-0.00544896	0.0250729	0.00385092	0.0808622	0.157316
cg00871610	-0.116753	0.00400683	0.0295377	0.00372213	8.00888e-05	0.28191
cg01899089	-0.139316	0.0114427	0.0257538	0.00329664	7.09781e-08	0.000535429
cg19572487	-0.212393	0.00914129	0.0331082	0.00468151	1.73406e-10	0.051077
cg09716613	0.0497582	-0.00143163	0.0323378	0.00399952	0.124045	0.72044
cg18758622	0.0116303	5.27322e-05	0.0187652	0.00274362	0.535468	0.984669
cg11730703	0.175092	-0.0153674	0.0493547	0.0045557	0.000399894	0.000764946
cg08375941	-0.121739	0.00730871	0.0529383	0.0103787	0.0215481	0.48137
cg13418576	-0.0761706	0.00986761	0.0329352	0.00506076	0.0208271	0.0514089
cg05284742	-0.0984559	0.0062754	0.0200607	0.00319052	9.86348e-07	0.0494079
cg03329539	-0.230611	0.0120351	0.0288204	0.00388096	2.05522e-15	0.00197023
cg13185177	0.0282213	0.00130853	0.0363147	0.00450493	0.43718	0.771506
cg09197783	-0.0870732	0.00814497	0.025484	0.00383062	0.000645201	0.0336672
cg27310319	0.0030757	-0.0054127	0.0333779	0.00558501	0.926588	0.332651
cg10420527	-0.0281327	0.00687456	0.0172814	0.00214731	0.103708	0.00140039
cg07180646	-0.053358	0.00566482	0.035277	0.00279102	0.130602	0.0425946
cg09662411	-0.14664	0.0151801	0.0437717	0.00499474	0.000824328	0.00241885
cg04551776	-0.121396	0.00787225	0.0276658	0.00420657	1.1978e-05	0.0615123
cg10251229	-0.00826521	0.00219954	0.0232817	0.00338906	0.722618	0.516448
cg18092474	-0.227423	-0.0117159	0.0585893	0.00479318	0.000108113	0.0146457
cg13247990	0.0434516	-0.00928256	0.0189214	0.00308231	0.0217392	0.00264991
cg01832549	-0.0477244	0.00726424	0.0300692	0.00262401	0.112679	0.00571366
cg08884752	-0.0512886	0.0024465	0.0259755	0.00360256	0.0484574	0.497195
cg19713429	-0.0381155	0.00545429	0.0333529	0.00353231	0.253284	0.122805
cg27241845	-0.163386	0.00252061	0.0316887	0.00377925	2.79363e-07	0.504917
cg02385153	0.120922	-0.00387491	0.0350897	0.00624568	0.000578247	0.535093
cg11660018	-0.183727	0.00316405	0.0271227	0.00252929	1.7543e-11	0.211174
cg21486510	0.017665	-0.00149186	0.020566	0.00319145	0.390465	0.640253
cg16047567	-0.100385	0.00522455	0.0347522	0.00327079	0.00392094	0.110436
cg00310412	-0.104922	0.00312822	0.0242083	0.00221738	1.55472e-05	0.158554
cg05508862	0.026354	-0.00151676	0.0206487	0.00223157	0.20202	0.496827
cg17372101	0.0790383	-0.00408628	0.0322344	0.00370768	0.0143007	0.270618
cg19956914	0.095304	-0.00643945	0.0441698	0.0029996	0.0311155	0.0319967
cg06644428	-0.758593	0.0332096	0.0772305	0.0104066	2.82332e-22	0.00145082
cg01882991	-0.0575878	0.000322226	0.0285669	0.0032423	0.0439614	0.92085
cg15693572	0.296479	-0.000668007	0.0755418	0.00518515	9.0844e-05	0.897512
cg21322436	-0.181569	0.00579747	0.0339363	0.00526034	9.66522e-08	0.270617
cg17287155	-0.196388	0.0253535	0.0436629	0.00655328	7.22242e-06	0.000114783
cg05460226	-0.0706972	0.0049198	0.0304976	0.0044362	0.0205364	0.267632
cg05183538	0.121174	-0.0174898	0.0437933	0.0063973	0.00570678	0.00634347
cg06459104	-0.193654	-0.00211826	0.0643858	0.00456934	0.0026766	0.643026
cg23771366	-0.201898	0.000383315	0.0304286	0.00276224	4.44815e-11	0.889655
cg01429256	0.0196173	-0.00177407	0.0128848	0.00215256	0.128012	0.409996
cg24389054	-0.115132	0.00978188	0.0401755	0.0050581	0.00420585	0.0533414
cg23067299	0.212799	-0.00368026	0.0651257	0.00939553	0.00110225	0.695342
cg11902728	0.044306	0.000765619	0.0225911	0.0032757	0.0499839	0.815234
cg25212025	-0.140109	0.0141258	0.0365797	0.00321334	0.00013301	1.19325e-05
cg01873977	-0.114085	0.00736148	0.0426161	0.00547192	0.00749026	0.178753
cg04517079	-0.0662886	0.00262629	0.0234368	0.00242129	0.00473318	0.278274
cg18335991	-0.0495889	0.000991322	0.0231144	0.00350365	0.0320315	0.777268
cg01756424	0.00898407	-0.000600199	0.0142649	0.00210202	0.52889	0.77528
cg08472795	-0.0613647	0.0129278	0.0235772	0.00335313	0.0093137	0.000121153
cg05824218	0.0551704	-0.00777637	0.0162219	0.00256641	0.000682919	0.00249391
cg25730428	0.0859498	-0.00296148	0.0274427	0.00313149	0.00176418	0.344473
cg07826859	-0.0869458	0.0104103	0.0192004	0.0030837	6.24566e-06	0.000757648
cg00689360	-0.101413	-0.00229969	0.0471636	0.00623965	0.0316551	0.712516
cg15212295	-0.058696	0.00390011	0.0285506	0.0047952	0.0399032	0.416173
cg07339236	-0.239784	0.0205701	0.051558	0.00886932	3.48266e-06	0.0205337
cg19254163	-0.0954482	0.00684937	0.0228559	0.00288128	3.09838e-05	0.0175886
cg19918734	-0.0608263	0.00446592	0.0242603	0.00401143	0.0122342	0.265789
cg12076915	-0.0728969	-0.00401547	0.0372602	0.00306346	0.0505937	0.190168
cg06595162	-0.0850014	0.00295372	0.0250386	0.00318918	0.000700663	0.354531
cg15408734	-0.0668897	0.0105866	0.0282988	0.00409694	0.0181831	0.00987294
cg04044720	0.0485864	0.00271239	0.0293842	0.00459704	0.0983709	0.555277
cg26707709	0.364846	-0.0127739	0.0869845	0.00668208	2.89487e-05	0.0561401
cg15342087	-0.24791	0.0111543	0.0335231	0.00470173	2.03365e-13	0.017818
cg02980249	0.0628168	-0.000312834	0.0239407	0.00255011	0.00877227	0.902385
cg24681208	0.040016	-0.000213376	0.0198021	0.00305686	0.0434189	0.944362
cg03991871	-0.335371	0.0132891	0.0544121	0.00502547	8.96956e-10	0.00828354
cg18642234	-0.0681306	0.00508226	0.0195222	0.00254442	0.000493867	0.045988
cg13500388	-0.0932092	0.00979444	0.0253458	0.00386635	0.000241181	0.0114185
cg19593285	-0.101013	0.0138603	0.03634	0.0054906	0.0054876	0.0117103
cg04359840	-0.0979675	0.00701364	0.0302211	0.00343061	0.00121002	0.0411119
cg00563932	0.0275057	0.00184582	0.021148	0.00264882	0.193543	0.486028
cg03999941	-0.041377	0.00587952	0.0400725	0.00574053	0.301935	0.30593
cg03604011	0.295858	-0.00121132	0.0888828	0.0124238	0.000887984	0.922345
cg12075928	-0.0979062	-0.00283332	0.0383655	0.00630397	0.0107764	0.653182
cg10012530	-0.0353902	0.00256332	0.0252217	0.00392312	0.160706	0.513623
cg14906103	0.0284857	-0.00496527	0.0258743	0.00405051	0.271045	0.220482
cg13832201	-0.0887699	0.00158767	0.0274995	0.00313226	0.00126891	0.612328
cg00541303	-0.0204306	0.00930689	0.0307783	0.00406691	0.506896	0.0222718
cg13127741	-0.05765	0.000785944	0.0264653	0.00311502	0.0295104	0.800844
cg23110422	-0.21792	0.0081672	0.0440245	0.00651376	7.99779e-07	0.210128
cg14012925	0.0700355	-0.00653344	0.0308482	0.00358474	0.0233051	0.0685997
cg17971600	0.0237442	-0.00219329	0.012645	0.0021178	0.060535	0.300558
cg21140898	-0.202831	0.00813082	0.0641457	0.00807853	0.00159132	0.314379
cg20303561	-0.0593341	0.0101146	0.0330635	0.00388884	0.0728896	0.00940253
cg21393163	-0.185758	0.00420403	0.0490685	0.0052068	0.000158555	0.419577
cg01208318	-0.199657	0.0188429	0.0525674	0.00439814	0.000151431	1.96915e-05
cg05673882	-0.163472	0.0105273	0.0409829	0.00420745	6.92456e-05	0.01247
cg19372602	-0.123406	0.00421137	0.0332778	0.00525449	0.000213556	0.423001
cg16276850	0.030146	-0.00451846	0.0191973	0.00326226	0.116471	0.166276
cg26764244	-0.18218	0.00888502	0.0544719	0.0051637	0.000843121	0.0855505
cg12758082	0.0279893	0.0030937	0.0168556	0.00249603	0.0969503	0.215403
cg15892280	-0.0686619	0.00789284	0.0158837	0.0023644	1.60913e-05	0.000867135
cg23090529	-0.186108	0.00226239	0.052774	0.00677513	0.000431016	0.73849
cg04039397	-0.12834	-0.00249603	0.0566705	0.00770008	0.0236403	0.745873
cg00116430	-0.110362	0.00933993	0.0377019	0.00340697	0.00346868	0.0062027
cg09109520	0.116672	0.00252789	0.0407841	0.00355979	0.00428238	0.477754
cg26337070	-0.207577	-0.000844864	0.0570575	0.00491033	0.000283709	0.863419
cg10807309	0.130158	-0.00501853	0.0331807	0.00318645	9.11886e-05	0.115512
cg12803068	0.411674	-0.0208698	0.084983	0.00521889	1.40944e-06	6.72316e-05
cg12423733	0.181042	-0.00965641	0.0614149	0.00846043	0.00323641	0.25393
cg23351584	-0.0985903	-0.00560591	0.0301074	0.00507337	0.00107293	0.269379
cg27598208	-0.0248277	0.000341477	0.0293758	0.00405426	0.39811	0.932889
cg16834726	0.0191881	0.00111268	0.0217479	0.00377211	0.377705	0.768063
cg25212453	-0.0427151	0.00544581	0.0535571	0.00754688	0.425216	0.470674
cg22403782	-0.20665	0.00917087	0.0534029	0.00410551	0.0001136	0.0256659
cg04521626	-0.0098564	0.00063253	0.018493	0.0027034	0.594102	0.815042
cg00808648	0.0156494	0.00354599	0.0199963	0.00366689	0.433928	0.333711
cg15159987	-0.110315	0.0091088	0.0204871	0.00287597	8.0802e-08	0.00157522
cg26282236	0.0555142	-0.010273	0.0365579	0.00298095	0.129086	0.000586626
cg02743070	-0.0642446	0.00863092	0.0192798	0.00316172	0.00087478	0.00642177
cg23480021	0.478917	-0.0105815	0.10392	0.00982921	4.37562e-06	0.28189
cg19427338	0.0529761	-0.00383134	0.0328499	0.00413269	0.106981	0.354057
cg15600935	0.0787363	-0.00946493	0.0401599	0.00709535	0.0500416	0.182446
cg04039799	-0.0389083	0.00770646	0.0216191	0.00307976	0.0720484	0.0124616
cg11263997	0.111191	-0.0137598	0.0431142	0.00580688	0.00997933	0.0179532
cg02985540	-0.0689339	0.00611691	0.0265662	0.00287608	0.00954391	0.0336222
cg07123182	-0.193971	0.01344	0.0683575	0.0105287	0.00458638	0.202002
cg23781467	0.110497	-0.00543358	0.0244625	0.00278802	6.68422e-06	0.0515253
cg00687135	-0.147412	0.00525112	0.0466287	0.00619477	0.00159356	0.396778
cg03188382	-0.104421	0.00542663	0.0274157	0.00289914	0.000144654	0.0614704
cg07626482	-0.0756626	0.00289106	0.0239297	0.00249599	0.00159522	0.246966
cg08396193	-0.0716261	0.0206412	0.0380835	0.00566785	0.0601369	0.000281375
cg01901332	-0.136544	0.00759545	0.0320532	0.00365141	2.15194e-05	0.0377113
cg07967717	0.0538624	-0.000804096	0.0250528	0.00312301	0.0316849	0.796854
cg01062937	0.0361521	-0.00118741	0.0169656	0.00227102	0.0332175	0.601166
cg02657160	-0.113253	0.00477618	0.0338253	0.00584816	0.000825753	0.41425
cg12101586	-0.292845	-0.0113557	0.0640281	0.00571999	5.16202e-06	0.0473249
cg06648759	0.0303689	-0.00362199	0.026152	0.00330245	0.245687	0.272949
cg27286011	0.0693985	-0.00261287	0.0312359	0.00330378	0.0264294	0.429162
cg17551891	-0.052815	0.000863239	0.0536163	0.00504517	0.324746	0.864171
cg02547394	-0.010021	-0.00119857	0.0409493	0.00679359	0.806697	0.859987
cg05951221	-0.539411	0.0222873	0.0399722	0.00362313	2.24337e-39	1.02362e-09
cg04704634	0.041031	-0.00438918	0.0260676	0.00380996	0.115629	0.24952
cg03450842	-0.0811224	0.00991617	0.0219274	0.00280536	0.000221948	0.000422486
cg11436113	-0.0849822	0.00568929	0.0226779	0.00328594	0.00018346	0.0836182
cg08266095	-0.126163	0.0152995	0.0422942	0.00415534	0.00289585	0.000240962
cg15417641	0.095463	-0.0173787	0.0664166	0.0059732	0.150819	0.00368254
cg09701700	-0.0647156	0.00802097	0.0304468	0.00285257	0.0336944	0.00500103
cg02375409	0.0705484	0.00854785	0.0355439	0.0035476	0.047325	0.0161153
cg05906166	-0.131954	0.00747473	0.0646001	0.00462974	0.0412656	0.106662
cg03194226	-0.0318962	-0.00836252	0.0302816	0.00477919	0.292304	0.0803908
cg26361535	-0.180396	0.0118415	0.042621	0.00373839	2.44407e-05	0.0015735
cg13543915	-0.0553354	0.00756526	0.019551	0.00273973	0.00469494	0.00583791
cg10592592	-0.0286291	0.0047909	0.034136	0.00322743	0.401775	0.137939
cg27178191	0.0328722	0.000430825	0.0171018	0.00233234	0.054727	0.853479
cg11071448	-0.122874	0.0114867	0.0288852	0.00490026	2.18069e-05	0.0192225
cg01692968	-0.200818	-0.00568649	0.0383582	0.00558127	1.80661e-07	0.308462
cg00533649	-0.0621294	0.00341108	0.027574	0.00222968	0.0243882	0.126299
cg09762515	0.0457198	-0.004385	0.029236	0.00469979	0.117998	0.350985
cg04324758	-0.248455	0.032548	0.0627071	0.00915709	7.66999e-05	0.000392382
cg24090911	-0.155096	0.000618808	0.038936	0.00673041	6.99173e-05	0.926758
cg07178945	0.192911	-0.000783283	0.0340454	0.00282753	1.73562e-08	0.781808
cg24230340	-0.141321	0.0161733	0.0417905	0.00378756	0.000738061	2.09817e-05
cg18961281	0.0502957	0.00707482	0.02186	0.00353532	0.0214897	0.0455809
cg25305703	-0.196791	0.00996555	0.046504	0.00571364	2.43092e-05	0.0813669
cg08595501	-0.118658	0.0212696	0.0488789	0.00859921	0.0152709	0.0135067
cg10919522	-0.121389	0.0151965	0.0331886	0.00493808	0.000260665	0.00213181
cg26703534	-0.135146	0.0162696	0.0208258	0.00280365	1.08282e-10	8.18829e-09
cg00893603	-0.157956	0.00768815	0.0524152	0.00455368	0.00262342	0.091588
cg23126342	0.216215	-0.00433467	0.0528115	0.00585754	4.42904e-05	0.459424
cg01127300	-0.190173	0.00816901	0.037312	0.00271756	3.89659e-07	0.00269788
cg20483374	0.0125634	-0.00416557	0.0194406	0.00305716	0.518184	0.173262
cg21611682	-0.0988251	0.0119418	0.0205083	0.00244749	1.56139e-06	1.19654e-06
cg19719391	0.042467	0.00627737	0.0264766	0.00341755	0.108889	0.0664706
cg00378510	-0.255665	0.0187893	0.0671739	0.00460988	0.000147062	4.864e-05
cg26540191	-0.247287	0.016775	0.0674841	0.00955679	0.000254531	0.0794931
cg03636183	-0.450405	0.0184464	0.0366717	0.00350025	3.20428e-33	1.59736e-07
cg22851561	-0.0508921	0.0107292	0.0236385	0.00398998	0.0314232	0.00725821
cg03220447	-0.00803972	0.0084607	0.0218796	0.00343417	0.713315	0.0138816
cg27332104	0.0827727	-0.0022626	0.0261797	0.00367768	0.00159155	0.538517
cg08038054	0.102632	-0.00883895	0.0382256	0.0051435	0.00731444	0.0859481
cg12876356	-0.253027	0.0172456	0.0590383	0.00541071	1.92886e-05	0.00147061
cg25013095	-0.104089	0.0144778	0.0599459	0.0112151	0.0826156	0.196962
cg13787850	-0.0651504	0.00781703	0.0352121	0.00396608	0.0644458	0.0489392
cg07090714	-0.0988812	0.00873729	0.0341904	0.00354977	0.00387575	0.0139718
cg09247392	-0.0367745	0.00436353	0.0208236	0.00333716	0.0775275	0.191253
cg00295485	-0.0905927	0.0128278	0.0298937	0.00395092	0.00247295	0.00119679
cg12303084	-0.104102	0.0145269	0.0293431	0.00301273	0.000399215	1.59258e-06
cg24838345	-0.160233	0.00669434	0.0526258	0.00839064	0.0023549	0.425111
cg00968616	0.000344829	-0.00203472	0.0197645	0.0029242	0.986082	0.486666
cg15059804	0.0699929	-0.0011114	0.0424316	0.00352221	0.0992386	0.752401
cg19838043	0.0462065	-0.00531062	0.0293615	0.00303379	0.115741	0.0802707
cg16219322	-0.0577565	6.62298e-05	0.0261746	0.00477087	0.027432	0.988926
cg23230929	0.068994	-0.000930688	0.0229364	0.00242446	0.00266761	0.701135
cg07954423	-0.0417847	0.00549796	0.0375192	0.00491389	0.265549	0.263406
cg05329352	-0.0879558	0.00371068	0.0393717	0.00338348	0.0256245	0.272974
cg13074055	-0.209428	0.0354659	0.0711171	0.00907145	0.00327139	9.73305e-05
cg02556928	-0.125003	0.000286532	0.0424884	0.00419741	0.00330563	0.945586
cg21446172	-0.0628777	0.00240901	0.0269946	0.00354863	0.0199439	0.49735
cg16116321	-0.0199215	0.00697751	0.0297081	0.0027818	0.502588	0.0122531
cg16178855	0.055921	-0.0028621	0.0207103	0.00268238	0.00699055	0.286171
cg03004371	0.0699854	0.00273292	0.0503447	0.00437857	0.16469	0.532634
cg09935388	-0.36096	0.0185131	0.0586998	0.00543536	9.80163e-10	0.00067934
cg19940644	-0.100523	0.0179591	0.0434063	0.00442434	0.0206847	5.21999e-05
cg10691866	-0.131474	0.0118506	0.0424746	0.0034289	0.00200138	0.000565782
cg27312979	0.118722	-0.0118332	0.0560406	0.00407139	0.0342991	0.0037182
cg11430077	-0.149359	-0.00329931	0.0505712	0.00610292	0.00318186	0.588868
cg12126344	-0.0502424	0.00391343	0.0257029	0.00424198	0.0507338	0.356417
cg10062919	-0.0303645	0.00276181	0.0149173	0.00198313	0.0419302	0.163962
cg09465703	-0.194091	0.0282692	0.0696668	0.00720129	0.00539617	9.11052e-05
cg26703507	-0.0759045	0.00715079	0.0341154	0.00461548	0.0261958	0.121552
cg12474798	-0.144172	0.0107665	0.0498952	0.00399255	0.0039133	0.00709605
cg01272202	-0.0830404	0.00810491	0.0274313	0.00384048	0.00249865	0.0350174
cg06819357	0.0557206	0.0045111	0.0328194	0.00360318	0.0897239	0.210804
cg07381806	-0.135784	-0.00126543	0.0534999	0.00830834	0.0112177	0.878967
cg24497361	-0.0431164	0.00522572	0.0236855	0.0027797	0.0688654	0.0603393
cg08757670	0.0256245	-0.00470244	0.021303	0.00365405	0.229148	0.198352
cg26669717	-0.0470585	0.0022005	0.0197977	0.00282086	0.0175455	0.435485
cg15542713	0.0594034	0.00025411	0.0614725	0.00580056	0.334017	0.965064
cg01218206	-0.0307445	0.00475021	0.0316514	0.00523466	0.331474	0.364336
cg01015663	-0.0768311	0.00556483	0.0262262	0.00356256	0.00343232	0.118524
cg22100563	0.0294768	-0.00477587	0.0337665	0.00523051	0.382779	0.361374
cg24996979	-0.054701	0.00776995	0.0242334	0.00357869	0.0240908	0.0300977
cg22635676	0.60263	-0.0175461	0.167604	0.0118802	0.000334391	0.139941
cg25197194	0.00878447	-0.00693077	0.0355886	0.00414304	0.805065	0.0945931
cg16062877	-0.0185342	0.000403726	0.0172578	0.00282441	0.282952	0.886358
cg00210249	0.0209265	0.00303685	0.0410652	0.00449738	0.610402	0.499639
cg27467282	0.058453	-0.00359638	0.0346955	0.00491573	0.0921865	0.46454
cg05677062	-0.114074	0.00488114	0.0356075	0.00378706	0.00138172	0.197662
cg15498134	-0.0718935	-0.00311763	0.0438333	0.00689482	0.101111	0.651223
cg09084391	-0.126372	0.0106898	0.0659157	0.00779897	0.0553692	0.170714
cg03254067	0.0443973	-0.000423659	0.0288118	0.0047593	0.123465	0.929082
cg11094248	-0.0490186	0.00827581	0.0189237	0.00326461	0.00964523	0.01136
cg15963463	-0.0439747	0.0083858	0.0244138	0.00354251	0.0718097	0.0180729
cg01763916	-0.100632	0.00804108	0.0226017	0.0036479	8.89359e-06	0.0276764
cg06321596	-0.102641	0.00449693	0.0367151	0.00455318	0.00523236	0.323508
cg12513616	-0.129865	0.00615733	0.0252556	0.0028037	3.01732e-07	0.0282603
cg11701312	-0.0309938	0.00277571	0.0177134	0.00211067	0.0803294	0.188713
cg04858631	-0.028463	0.00489612	0.0344735	0.00604045	0.409083	0.417768
cg11390978	-0.175812	0.0263838	0.061438	0.0110486	0.00424947	0.0170819
cg27262054	-0.0294257	0.00374776	0.0341102	0.00349619	0.388443	0.283939
cg24688690	-0.058703	0.00837896	0.0151477	0.00235851	0.000109477	0.000395001
cg06369322	-0.0211864	0.0022352	0.0188048	0.00273748	0.260018	0.414353
cg04673446	0.0382602	-0.00307178	0.021098	0.00377274	0.0698819	0.415675
cg19325791	0.0279727	0.00169829	0.0317424	0.00518225	0.378277	0.743182
cg19744173	0.0239329	-0.00105648	0.0228152	0.00309872	0.294307	0.733203
cg07029024	0.0549106	-0.00990809	0.0334527	0.00448311	0.100863	0.0272738
cg25317941	0.0743562	0.000578843	0.0203339	0.00360648	0.000260689	0.872512
cg25727671	-0.0537114	0.0113127	0.0520265	0.00849184	0.301998	0.183031
cg26850624	0.207552	0.00372718	0.0582723	0.00396819	0.000380183	0.347772
cg13518625	-0.198332	0.0207662	0.0811683	0.0121043	0.0146251	0.0864717
cg17566560	-0.0426099	-0.00221722	0.025895	0.00481958	0.0999914	0.64556
cg16611234	-0.177405	0.0121517	0.0456063	0.00496811	0.000104033	0.0145801
cg16151538	-0.0113087	0.00217408	0.0242406	0.00427535	0.640885	0.611177
cg04368724	0.126354	-0.00557698	0.0410297	0.0045584	0.00210502	0.221384
cg14264316	-0.0688923	0.00296182	0.0274527	0.00493928	0.0121529	0.548848
cg26151910	-0.04107	0.00413642	0.037156	0.00594498	0.269128	0.48669
cg26486070	-0.0725345	0.00928628	0.0373999	0.0036136	0.0526216	0.0102866
cg14254999	-0.0629066	-0.0113329	0.043901	0.00794562	0.152006	0.154019
cg00699986	0.00395015	-0.00157712	0.026998	0.00446341	0.883687	0.723887
cg06688763	0.252244	-0.00961192	0.072823	0.00567084	0.000547494	0.0903207
cg15700587	0.0404314	0.00596944	0.0284996	0.0051684	0.156121	0.248305
cg03489965	0.11438	0.00291088	0.0388721	0.00429427	0.00329869	0.497986
cg07413467	0.130954	-0.00500122	0.0407254	0.00379685	0.00132759	0.188004
cg01731783	-0.0450686	0.00350638	0.0149163	0.00250159	0.00254223	0.161255
cg06635952	0.0831102	0.0040478	0.0243203	0.00315361	0.000645354	0.199531
cg17087741	-0.156293	-0.00390016	0.0659874	0.0110289	0.0179406	0.723673
cg20438687	-0.125781	0.00779949	0.032075	0.00361632	9.13158e-05	0.0312094
cg07986378	-0.14131	0.0054248	0.0414417	0.00702055	0.000660893	0.43984
cg22356527	0.00448149	0.00703217	0.0295613	0.00529273	0.879515	0.184196
cg01839993	-0.0403913	0.00447956	0.0291262	0.0026798	0.165705	0.0948487
cg13020466	0.0189466	-0.00485911	0.0257061	0.00427931	0.461166	0.25638
cg01951879	0.0112942	0.0014949	0.0413384	0.00557681	0.784718	0.788699
cg24931658	-0.0620893	0.0022706	0.024556	0.00296093	0.0115382	0.443309
cg16398761	-0.262082	0.0121566	0.0594239	0.00985663	1.07786e-05	0.217671
cg26196424	-0.0453135	0.00817057	0.0350743	0.00513137	0.19652	0.111568
cg14563949	0.00349703	0.00812832	0.0188041	0.00291781	0.852484	0.0054185
cg09554443	0.0448515	0.00181174	0.0294212	0.0027997	0.127587	0.517669
cg07069636	-0.0614075	0.00455533	0.0204185	0.00240594	0.00267072	0.0585354
cg09560590	0.0253222	-0.0050514	0.0322238	0.00328667	0.432083	0.124553
cg04907244	-0.104916	0.00487171	0.0533758	0.00496903	0.0495153	0.327066
cg23576855	-0.493348	0.0306833	0.140693	0.00571055	0.000468682	9.16672e-08
cg16519923	-0.104978	0.00360023	0.0243148	0.00394529	1.64484e-05	0.361661
cg04806562	0.0109177	0.00273213	0.0176936	0.00258767	0.537273	0.291244
cg12619504	-0.0423931	-0.000752962	0.031498	0.00265436	0.178531	0.776709
cg09848445	-0.112853	0.0124595	0.0598162	0.0106512	0.0593219	0.242307
cg26477856	-0.0312254	0.00610407	0.0171538	0.00270192	0.0688414	0.024041
cg24556382	-0.119714	0.00750641	0.0444794	0.00497764	0.00718204	0.131795
cg23401251	0.0583281	-0.000998932	0.0261125	0.00398369	0.0256005	0.802043
cg19859270	-0.242581	0.0112333	0.0389972	0.00705201	5.78032e-10	0.111418
cg19459791	0.0772586	-0.0038117	0.0357458	0.00432998	0.0307964	0.378858
cg11231349	-0.216195	-0.00513804	0.0506307	0.00699436	2.04344e-05	0.462717
cg03399898	-0.0856601	0.00948692	0.0609486	0.00488846	0.160092	0.0525172
cg16255816	-0.0466837	0.000214056	0.0294175	0.00342052	0.112702	0.950111
cg10874644	0.1713	-0.000543529	0.0576253	0.00732441	0.00298899	0.940856
cg17668731	-0.00952739	0.00556667	0.0182181	0.00318323	0.601046	0.0805701
cg14435720	-0.0538191	0.0222263	0.0767648	0.0116006	0.48332	0.055592
cg09658497	-0.254604	0.0116231	0.0905385	0.00748607	0.00498407	0.120756
cg06885459	0.0596159	0.00324968	0.0336507	0.00314517	0.0766457	0.301688
cg01207684	-0.183879	0.0118496	0.0569615	0.00697071	0.0012676	0.0893864
cg08606254	0.117107	0.00050077	0.0493614	0.0070272	0.0177607	0.9432
cg00336149	0.0543623	-0.00805621	0.0465377	0.00317335	0.242943	0.0112435
cg21473814	0.0349372	-0.0066226	0.0340777	0.00387672	0.305398	0.0878212
cg18146737	-0.69805	0.0669843	0.161033	0.0146902	1.5503e-05	5.61445e-06
cg02583484	-0.0946722	0.00469276	0.0276803	0.00256293	0.000641534	0.0673314
cg20357806	-0.00632336	0.0157403	0.0312666	0.00493911	0.839747	0.00147241
cg06972908	-0.0790806	0.00825195	0.0246819	0.00423696	0.00137276	0.0516761
cg04701628	0.0373342	-0.00561677	0.0181025	0.00309668	0.0392772	0.069939
cg26718213	0.293911	-0.00793243	0.0792961	0.00486501	0.000218069	0.103247
cg16201146	-0.0764704	0.00578169	0.0275556	0.00417059	0.00556429	0.165896
cg25748521	-0.0609505	0.000398174	0.0225749	0.00371209	0.00698465	0.914596
cg13193840	-0.231344	0.00992159	0.0598825	0.010999	0.000114672	0.367201
cg20684110	-0.139136	0.018208	0.0434276	0.00403083	0.00138262	6.85321e-06
cg15806304	0.0477364	-0.00579846	0.0244131	0.00314413	0.0506843	0.0653812
cg26844633	-0.113831	0.00934591	0.0444902	0.0069952	0.0105746	0.181768
cg03348792	0.0639093	0.00194451	0.0280896	0.00404548	0.0229933	0.630837
cg08035323	0.234706	-0.0174782	0.0460729	0.00409256	3.92159e-07	2.09166e-05
cg21188533	0.0827193	-0.0238456	0.080946	0.0061243	0.306989	0.000103798
cg23441210	0.0322112	-0.00935659	0.0271247	0.00496401	0.235133	0.0596658
cg11557553	0.0509586	0.00126828	0.021346	0.00373792	0.0170486	0.734438
cg13428066	0.00667433	-0.00237916	0.0230123	0.00361543	0.771817	0.510622
cg13937905	-0.128627	0.00549238	0.0546525	0.00640299	0.0187016	0.391175
cg22407942	-0.0954049	0.0116216	0.0462836	0.00391634	0.0394395	0.00305833
cg20295214	-0.0694725	0.00894189	0.0330312	0.00550891	0.035549	0.104793
cg26364091	-0.0279188	-0.00330513	0.0221238	0.00287034	0.207123	0.249748
cg26963277	-0.240443	0.00703009	0.0566783	0.00631618	2.32771e-05	0.265904
cg10678215	0.0323477	-0.0111039	0.0374958	0.00564634	0.388395	0.0494436
cg08972170	0.0511261	0.0018834	0.0368136	0.00498933	0.165051	0.705876
cg10965178	-0.0193368	0.00395859	0.0273882	0.00329161	0.480259	0.229338
cg01481251	-0.154282	0.0169384	0.0523543	0.00799214	0.00324331	0.0342475
cg25949550	-0.257491	0.0190347	0.0333713	0.00386167	1.9769e-14	9.34256e-07
cg14580211	-0.172801	0.00980767	0.0298316	0.00372425	8.09317e-09	0.00855246
cg19816811	-0.110564	0.0106365	0.0429657	0.00308347	0.0101697	0.000579789
cg24698211	-0.069415	0.00255651	0.0308271	0.00344388	0.0244605	0.45802
cg25921609	0.0715681	-0.00834449	0.0350446	0.00462664	0.0412641	0.0715314
cg20305005	-0.0120636	0.00442184	0.0313793	0.00424579	0.700691	0.297855
cg10592478	-0.0946482	-0.00392899	0.0429153	0.00737745	0.0275146	0.594425
cg09975715	0.0466219	-0.00891766	0.0337898	0.00563424	0.167789	0.113718
cg21869609	-0.22652	0.0159837	0.0911338	0.0051193	0.0130491	0.00183462
cg23842572	0.0816854	-0.00159137	0.0269293	0.00404213	0.00244701	0.69387
cg01744331	-0.233415	0.00140437	0.0694955	0.0106718	0.000796166	0.895324
cg16391678	-0.089536	0.00354807	0.0225852	0.00356696	7.58578e-05	0.320072
cg08666707	-0.0323807	0.00489135	0.0196391	0.00304688	0.0993315	0.10866
cg22876908	-0.0379006	0.00174536	0.0195953	0.0028938	0.0532254	0.546525
cg23594345	-0.152848	0.0176978	0.0532285	0.00534391	0.00413595	0.000952547
cg25292882	-0.165346	0.016037	0.0418528	0.00732759	8.01137e-05	0.0288036
cg14817490	-0.268994	0.0277068	0.0396951	0.00403859	1.70126e-11	1.06673e-11
cg26995224	-0.0205085	0.00622451	0.0515483	0.00315703	0.6908	0.0488631
cg19089201	0.410038	-0.0335064	0.101998	0.008431	6.09805e-05	7.45012e-05
cg02917867	-0.0659992	0.00915833	0.0239856	0.00310201	0.00598496	0.00321041
cg10403394	0.093317	-0.011406	0.0670586	0.00483437	0.164261	0.0184558
cg13038618	-0.148639	0.0168703	0.0330933	0.00492832	7.44084e-06	0.00063831
cg11225089	0.0144627	0.00426291	0.0238286	0.00381599	0.543945	0.264152
cg10827488	0.0127117	0.00533857	0.0248373	0.00366629	0.608844	0.145604
cg03660377	-0.0952085	-0.00346265	0.0491094	0.00723686	0.0526671	0.632394
cg10255761	-0.07184	-0.0014095	0.026286	0.00287713	0.00633914	0.62429
cg01097768	-0.0519187	0.00674714	0.0243255	0.00452247	0.0329115	0.135962
cg11666770	-0.204058	-0.0019842	0.108223	0.00622901	0.0595626	0.750125
cg17333042	-0.0213371	0.00268468	0.0211167	0.00243368	0.312421	0.270172
cg09469355	-0.0470271	0.00236386	0.0230753	0.00269997	0.0416948	0.381457
cg18900812	-0.109914	-0.00667813	0.0477212	0.00816089	0.0213517	0.413333
cg18295744	-0.0350109	0.00769956	0.0206403	0.00346446	0.0899689	0.0264246
cg02228160	0.0568521	-0.00352177	0.0305282	0.00322745	0.0627359	0.275397
cg26788216	-0.114627	0.00160005	0.032062	0.00421664	0.000358404	0.704408
cg11207515	0.194148	-0.0100626	0.0486554	0.00566469	6.86209e-05	0.0759067
cg20066188	-0.181006	0.0109151	0.0465175	0.00302488	0.000104305	0.000319791
cg01294327	-0.236834	0.0146061	0.0662322	0.00398969	0.000360799	0.000261381
cg10750182	-0.0899141	0.00723173	0.015575	0.00240952	8.85822e-09	0.00273956
cg11145461	-0.0866442	0.00947111	0.038104	0.00625466	0.0230616	0.130205
cg16880946	-0.0879908	0.0100941	0.0366846	0.0025338	0.0165827	7.16118e-05
cg00871371	0.00197548	0.00289094	0.0226716	0.00309562	0.930573	0.350541
cg08899667	0.0853057	-0.00166918	0.02606	0.00281634	0.00108356	0.553506
cg11197630	-0.0607082	-0.00371392	0.047788	0.00863221	0.204071	0.667092
cg26878655	-0.0121453	0.00759135	0.0281017	0.00510387	0.665639	0.137157
cg08386009	-0.0365873	0.00198909	0.0165735	0.00267993	0.0273709	0.458091
cg09022230	-0.0830067	0.00918482	0.0316154	0.00351741	0.00872646	0.00912667
cg22937882	0.0712636	-0.00647819	0.026164	0.00440914	0.00650196	0.142002
cg03611151	0.0659185	-0.00669293	0.0298622	0.00424331	0.0273933	0.114972
cg15636519	-0.069037	-0.00960195	0.0430643	0.00725056	0.109042	0.185636
cg13582060	-0.101423	0.0174785	0.0593533	0.0081609	0.0876411	0.0323975
cg08947774	0.0588671	-0.0107418	0.0279928	0.00413425	0.0355866	0.0094755
cg00324097	-0.0266087	0.0035208	0.0169585	0.00247842	0.116784	0.155681
cg00911794	0.0497122	0.000923388	0.0448734	0.00610511	0.268066	0.879804
cg12806681	-0.212686	0.0173584	0.0448969	0.00620714	2.31599e-06	0.00524237
cg20873136	0.0503495	-0.000263691	0.024235	0.00403033	0.0378585	0.947844
cg14165660	0.0385863	-0.00109763	0.0279274	0.00402866	0.16722	0.785315
cg05517711	-0.0240874	0.0018491	0.0169641	0.00245876	0.155781	0.452161
cg10179300	-0.0457133	0.00575142	0.0401438	0.00533382	0.254949	0.281103
cg06294803	-0.0947691	0.0145094	0.0448985	0.00598452	0.0349193	0.0154668
cg06151964	0.00822365	0.00456644	0.018335	0.00282259	0.653821	0.105948
cg06394460	-0.18963	0.00542537	0.0505743	0.00730633	0.000181908	0.457885
cg06513247	-0.00716381	0.00263666	0.0156377	0.0024299	0.646917	0.278084
cg19406367	0.0581578	0.00217221	0.0410727	0.00427417	0.156966	0.611388
cg03415545	-0.120529	0.00897539	0.052501	0.00804014	0.0217831	0.264491
cg02101876	0.102429	0.0059613	0.0481304	0.00855419	0.0334216	0.485997
cg02556393	-0.140067	0.00497868	0.0376735	0.00462003	0.000206723	0.281401
cg25421530	0.0966363	-0.0185269	0.0416137	0.00629678	0.0203112	0.0033159
cg01435643	0.0698578	0.00850922	0.0533737	0.00475355	0.190777	0.0736745
cg17814814	0.0127502	0.00137396	0.020958	0.00315949	0.543007	0.66373
cg02013841	-0.0699696	0.00355335	0.0511678	0.00945289	0.171604	0.707051
cg06949439	-0.0537206	0.00503698	0.0309117	0.00311748	0.0824182	0.106419
cg10520740	-0.0474539	0.00555194	0.0173085	0.00267567	0.00616155	0.0381884
cg15482893	0.0738672	0.00401659	0.0342591	0.00500706	0.0311829	0.422592
cg02782510	-0.00997127	0.000288569	0.0301329	0.00487958	0.740742	0.952851
cg14093127	-0.162658	0.0156581	0.0461814	0.00563503	0.00043828	0.00553626
cg26790897	0.074765	-0.000943314	0.0287754	0.00419633	0.0094346	0.822174
cg01856529	-0.0634449	0.00530454	0.0322758	0.00532607	0.0494482	0.319456
cg05529343	0.205225	-0.00258822	0.0782196	0.0082918	0.00877663	0.754984
cg02186444	0.0425037	-0.00332193	0.0243957	0.00257318	0.0816408	0.196942
cg14142087	0.0530721	0.000449201	0.022324	0.00258779	0.0175404	0.862219
cg12547807	-0.0765576	0.00817285	0.0207736	0.00253146	0.000234915	0.00127563
cg10825315	0.0077622	0.000547924	0.0301261	0.00492965	0.796694	0.911516
cg19589396	-0.130317	0.00973512	0.0333451	0.00406524	9.63937e-05	0.0167784
cg08118908	0.0770171	-0.0196913	0.0423866	0.00669266	0.0693448	0.0033164
cg00073090	-0.102828	0.00606235	0.0221906	0.00283504	3.82809e-06	0.0326736
cg01513913	-0.0825834	0.00907843	0.0294005	0.00252461	0.00503276	0.000335418
cg23973524	0.0749703	-0.011072	0.0353229	0.00301499	0.0339588	0.000250164
cg13976502	-0.0271468	0.00298509	0.0192509	0.0028957	0.158634	0.302795
cg13525276	0.0502601	-0.0131463	0.0397542	0.0053719	0.206278	0.0145271
cg13039251	0.19177	-0.00232361	0.0489316	0.00511962	9.23521e-05	0.650003
cg08149865	-0.0675812	0.00145269	0.0255241	0.00280654	0.00817601	0.604821
cg25953130	-0.255154	0.015227	0.0481696	0.00596283	1.31507e-07	0.0107733
cg00501876	-0.026147	0.0012484	0.0203291	0.00320967	0.198509	0.697377
cg05969150	0.0308166	-0.000489167	0.0182255	0.00213813	0.0910399	0.819075
cg00976097	0.446423	-0.00556776	0.162728	0.0102189	0.00615657	0.585952
cg23565821	-0.0825379	0.00732737	0.0265118	0.00363745	0.00187594	0.04417
cg21161138	-0.25469	0.0195968	0.0286515	0.00384247	1.33364e-18	3.89617e-07
cg17619755	0.181202	-0.00205214	0.044539	0.0038904	4.96791e-05	0.597945
cg11152412	-0.0752773	0.00557831	0.0313329	0.00522256	0.0163592	0.285665
cg16936060	0.0424748	0.00189598	0.0283053	0.00349994	0.133628	0.588105
cg14712058	-0.0677497	0.00560748	0.0326933	0.00421833	0.0383701	0.183979
cg24693803	0.0276965	-0.00180287	0.029077	0.00276133	0.340972	0.513936
cg12406027	-0.040578	0.00484414	0.02302	0.00241049	0.0781263	0.04468
cg17038235	0.0107259	0.00515107	0.025802	0.00297959	0.677678	0.0840865
cg16503724	0.0527106	0.000325962	0.0225699	0.00323134	0.0196139	0.919665
cg26060489	-0.0155413	0.00512881	0.020362	0.00350459	0.445387	0.14359
cg09607043	0.0826652	-0.0111926	0.0373269	0.00572249	0.0268864	0.0506932
cg12873476	-0.0769289	-0.00136554	0.0376359	0.00303743	0.0411215	0.653095
cg00085013	0.0108591	0.00410294	0.0231842	0.00342232	0.639557	0.230793
cg26529655	-0.0356485	-0.000227829	0.0218491	0.00363561	0.102901	0.950042
cg19211853	-0.0293839	-0.00325238	0.115231	0.0159399	0.798749	0.838354
cg02451831	-0.0655105	0.0129849	0.0270451	0.00400324	0.0155059	0.00121069
cg06235438	-0.106318	0.00925987	0.0262918	0.00462258	5.42e-05	0.0453671
cg02775417	-0.127929	0.00798278	0.0662594	0.0117984	0.0536299	0.49878
cg20059928	-0.187795	0.00500402	0.0434161	0.00312785	1.62399e-05	0.109881
cg10951873	-0.0580784	0.000944016	0.0321908	0.00502016	0.0713337	0.850871
cg25809905	0.0819772	-0.00936928	0.0423074	0.00339929	0.0528509	0.0059305
cg16969872	-0.0559264	0.00868979	0.0367801	0.00413816	0.128547	0.0359283
cg19046189	0.0328221	-0.00682341	0.016611	0.00249471	0.0482878	0.00631975
cg23667432	-0.0535451	0.00717312	0.0196	0.00343373	0.00634321	0.0369018
cg01005506	-0.107908	0.00946102	0.0317414	0.00266667	0.000691908	0.00040219
cg14074174	-0.0660585	0.00595421	0.0208952	0.00217818	0.00159749	0.00635018
cg04956244	0.0458696	-0.00148597	0.015798	0.00246727	0.00372553	0.547098
cg03345925	0.0555946	0.00489052	0.026442	0.00339376	0.0356371	0.149816
cg27537125	-0.105624	0.0137743	0.0229081	0.00334948	4.24558e-06	4.16172e-05
cg20902353	-0.0238042	0.00550349	0.0175198	0.00254368	0.174385	0.0306784
cg13784312	-0.219285	0.00175179	0.130337	0.023377	0.0926073	0.940277
cg11902777	-0.309291	0.00616223	0.0598881	0.00595627	2.70016e-07	0.301058
cg21747070	-0.0395438	0.00757872	0.0340951	0.00294264	0.246304	0.0101214
cg17024919	-0.253075	0.014941	0.0694664	0.00498135	0.000278605	0.00275671
cg21566642	-0.686656	0.0301293	0.0510332	0.00460186	3.732e-39	8.47558e-11
cg08763102	-0.0516716	0.00989995	0.0211001	0.00341097	0.0144032	0.00376588
cg18754985	-0.137191	0.00952453	0.0461493	0.00889631	0.0029786	0.284537
cg22132788	0.700528	-0.0532093	0.120199	0.00884831	6.87538e-09	2.39542e-09
cg03646329	-0.250127	-0.000463841	0.0593343	0.00885257	2.5944e-05	0.958221
cg14120703	-0.0763606	0.00880865	0.0159828	0.00262195	1.88198e-06	0.000803185
cg02336104	-0.0843279	0.00342425	0.0327709	0.0029826	0.010164	0.251152
cg04813697	-0.0869091	0.00321653	0.0367519	0.00429296	0.0181471	0.453838
cg03519879	-0.0399125	0.00544172	0.0177016	0.00251503	0.0242533	0.0306746
cg27449150	-0.0600597	0.00303521	0.0300975	0.00455342	0.0461105	0.50516
cg04573702	-0.067133	0.00401057	0.0223956	0.00310717	0.00275325	0.19702
cg07465627	-0.0227541	0.00396951	0.0234479	0.00370239	0.331946	0.283854
cg04970434	0.00187014	-0.00262283	0.0272527	0.00346747	0.945297	0.44954
cg04383058	-0.0155785	0.00517446	0.0285797	0.00430282	0.585746	0.229365
cg16702313	-0.0520521	0.00905943	0.0185175	0.00332449	0.00497745	0.00651502
cg23198793	0.0398327	0.00170728	0.0307876	0.00412252	0.195888	0.678845
cg09578155	-0.0424191	0.00921783	0.0150432	0.00218708	0.00484924	2.67364e-05
cg10788371	-0.072073	0.0080638	0.0297709	0.00256509	0.0155947	0.00170642
cg20103692	0.0753532	-0.0143916	0.0358585	0.00623233	0.0357084	0.0210907
cg24741609	-0.0315458	0.00827394	0.0288859	0.00296325	0.274952	0.0053135
cg22539182	0.0688875	0.000358192	0.0241794	0.00229362	0.00444066	0.875924
cg12836863	0.040713	-0.00408464	0.0241907	0.00424666	0.0924998	0.336304
cg14977938	0.0728938	-0.00573793	0.0307269	0.00331631	0.0177853	0.0838285
cg06433467	-0.19144	0.00202469	0.0629878	0.00731423	0.00240487	0.781965
cg18991417	0.00400823	0.00292584	0.0280783	0.00367062	0.886501	0.425541
cg05957567	0.0631957	-0.00153339	0.0215371	0.00287784	0.0033817	0.594246
cg02035751	-0.0310156	0.00449368	0.0196047	0.00287692	0.113786	0.118542
cg19847577	0.00168607	0.00212912	0.0331837	0.0031154	0.959483	0.494465
cg01442064	-0.051339	0.00166292	0.0229137	0.00334874	0.0251576	0.619568
cg15087369	0.00222751	0.00212787	0.0320181	0.00485262	0.944542	0.661097
cg16983588	0.124414	-0.00720054	0.041705	0.00402463	0.00289462	0.0738286
cg14179389	-0.12573	-0.00123115	0.0590396	0.00578796	0.0333546	0.831588
cg04258133	0.120802	-0.0160354	0.0386234	0.00454738	0.00178951	0.000436087
cg09099830	-0.0901185	0.0071063	0.0291984	0.00277021	0.00206021	0.010423
cg24719910	-0.0826253	0.00542022	0.0443861	0.00833635	0.0627853	0.515682
cg04018738	0.315018	-0.0118897	0.0705463	0.00601144	8.56878e-06	0.0481608
cg19825437	-0.0634579	0.00841724	0.0296672	0.00345865	0.0325691	0.0150813
cg09570614	0.0556908	0.00347249	0.0230599	0.002498	0.0158358	0.164736
cg24158160	0.0405619	-0.0123854	0.0261366	0.00452983	0.12081	0.0063384
cg21913886	-0.114553	0.00719225	0.0412625	0.00466447	0.00555724	0.123335
cg00835193	-0.161433	0.00484486	0.0465822	0.00522716	0.000541728	0.354171
cg23673974	0.00276489	0.00457472	0.0216892	0.00376803	0.898573	0.224936
cg01668352	-0.0264998	0.0125889	0.03183	0.00619816	0.40518	0.04245
cg11253886	0.137384	-0.00225691	0.0340867	0.00301897	5.83166e-05	0.454852
cg18316974	-0.455969	0.0297227	0.117028	0.0130831	0.00010134	0.0232628
cg18625627	0.0246572	-0.00913795	0.0413673	0.00568244	0.551204	0.108056
cg07063068	-0.114512	0.00533858	0.0596316	0.009443	0.0549407	0.571934
cg26271591	-0.137874	0.000422982	0.0448209	0.00691437	0.00212265	0.95123
cg10814005	-0.184492	0.00853582	0.0378672	0.00513688	1.19039e-06	0.0968227
cg24049493	0.0568974	-0.00512233	0.0748771	0.00557382	0.447448	0.358267
cg03316752	-0.115607	0.0136254	0.0453392	0.00762095	0.0108404	0.0740244
cg05302489	0.118401	0.00376499	0.0448441	0.00508496	0.00835638	0.459183
cg12729894	-0.0354887	-0.000451737	0.0230453	0.00323945	0.123724	0.889118
cg03957124	-0.0769722	0.0074493	0.0207484	0.0033802	0.000212256	0.0277147
cg11824827	0.043279	-0.00370492	0.0264956	0.00318163	0.102547	0.244449
cg14089503	-0.097313	0.0105787	0.0366077	0.00439573	0.00792313	0.0162452
cg19925780	0.0955322	-0.00299662	0.0414134	0.00583414	0.0211635	0.607594
cg01017464	-0.125377	0.0178372	0.0397663	0.00470197	0.00164293	0.000155337
cg22845855	-0.0943347	0.00427858	0.0417005	0.00591709	0.0237874	0.469755
cg22870429	-0.0579793	0.00519592	0.0254536	0.0035919	0.0228368	0.14826
cg03109660	-0.103386	0.0108525	0.0238736	0.00387703	1.5496e-05	0.00519873
cg17924476	0.203021	0.00430131	0.0418404	0.00368907	1.3409e-06	0.243845
cg22891595	0.0290518	0.000538005	0.0233278	0.00296082	0.213146	0.85584
cg01940273	-0.380582	0.0135111	0.0340621	0.003465	5.21491e-28	0.00010142
cg04716530	-0.100221	0.00728799	0.0284235	0.0044929	0.000430236	0.105031
cg11554391	-0.265952	0.0231427	0.0374507	0.00486876	1.72088e-12	2.22517e-06
cg23233742	-0.077775	0.000281902	0.029394	0.00306619	0.00822045	0.926761
cg25648203	-0.234013	0.0233472	0.0320798	0.00421048	4.31932e-13	3.56586e-08
cg14675361	0.0674119	0.00419537	0.0456374	0.00621718	0.139797	0.499921
cg23219570	0.133411	0.00164302	0.0295459	0.00346756	6.72269e-06	0.635704
cg22998476	-0.0494881	0.00827753	0.0263898	0.00316175	0.0609154	0.00895095
cg27405731	0.0195365	-0.00116559	0.0319343	0.00398635	0.540762	0.770031
cg11690578	-0.150144	0.00528876	0.0344293	0.0047416	1.35913e-05	0.264887
cg20244340	-0.116397	0.00882087	0.0396671	0.00301526	0.00339311	0.00349984

## Sheet: all results TSQL3
CpG site	cross-sectional coefficient TSQL 3	longitudinal coefficient TSQL 3	cross-sectional coefficient SE TSQL 3	longitudinal coefficient SE TSQL 3	cross-sectional coefficient pvalue TSQL 3	longitudinal coefficient pvalue TSQL 3
cg05575921	-0.642572	0.0192273	0.0908374	0.0104942	2.15671e-12	0.067154
cg23079012	-0.158979	0.00890526	0.071892	0.0097539	0.0271252	0.361418
cg06126421	-0.227118	-0.00382041	0.0496029	0.00446228	5.04354e-06	0.39207
cg25512107	-0.0180207	-0.00142361	0.0503031	0.00957701	0.720192	0.881854
cg07251887	-0.0695037	-0.00278367	0.0238672	0.00316838	0.00363072	0.379793
cg14753356	-0.0840929	-0.000514702	0.0260858	0.00352639	0.00128594	0.883978
cg25189904	-0.175046	-0.00811595	0.05627	0.00487354	0.00189926	0.0960927
cg15022400	-0.0442928	-0.00296114	0.0299816	0.00377299	0.139755	0.432698
cg15187398	-0.0205053	0.000892111	0.0385377	0.00332526	0.594744	0.788524
cg05875421	-0.0820276	0.0084656	0.0328733	0.00556893	0.0126532	0.128713
cg13184736	-0.0318131	-0.0144228	0.0768187	0.00661715	0.678834	0.0294709
cg23161492	-0.115488	0.00494226	0.0443423	0.00363185	0.00929067	0.173809
cg09338136	-0.11895	0.0085159	0.0318574	0.00384864	0.000194359	0.027093
cg12147622	-0.0453122	-0.00989282	0.0310966	0.00431913	0.145231	0.0221564
cg24540678	-0.0800751	-0.00110892	0.0282631	0.00369561	0.00465594	0.764177
cg07306253	-0.0123028	-0.00209105	0.0219045	0.00385309	0.574403	0.587432
cg15474579	-0.0824621	0.000728272	0.027713	0.00347321	0.0029616	0.833948
cg13399816	-0.0635486	-0.00126913	0.0393265	0.00335213	0.106316	0.705046
cg07202214	0.0028385	-0.00546026	0.0308024	0.00361729	0.926587	0.131418
cg10380221	0.00157127	0.00084039	0.0339809	0.00371166	0.963125	0.820912
cg25469474	-0.0766296	0.037982	0.0715581	0.0118444	0.284337	0.00137519
cg23916896	-0.113307	-0.00836099	0.0643333	0.00824177	0.0783553	0.31055
cg04225775	0.0165538	0.00290596	0.0330522	0.00388102	0.616547	0.454135
cg04180046	0.0526547	0.00120352	0.0410906	0.00313556	0.200242	0.701169
cg01836137	0.0560138	-0.00703998	0.0285824	0.00314821	0.0501859	0.0255117
cg18446336	-0.110301	0.00793006	0.0509706	0.0040009	0.0306203	0.0476829
cg05194346	-0.0184002	0.00346935	0.0402237	0.00384553	0.647412	0.367132
cg02257517	0.040704	0.000571019	0.0220906	0.00275548	0.065547	0.835863
cg19827923	-0.0159134	0.0029606	0.0198859	0.00337509	0.423655	0.380543
cg26856289	0.00379646	-0.0048687	0.0281609	0.00409495	0.892773	0.234676
cg19717773	-0.136759	0.00794657	0.0751919	0.00532585	0.0691464	0.135929
cg01439566	0.0219963	-0.00393904	0.0221631	0.00401398	0.321063	0.32661
cg13578465	0.0570505	-0.00273481	0.0578932	0.00442921	0.324565	0.537047
cg26077378	-0.190733	0.0078425	0.0630919	0.00665402	0.00253942	0.238769
cg03234777	-0.0297723	7.92333e-05	0.0406863	0.00516445	0.46441	0.987762
cg03440944	-0.0241928	0.000411061	0.0299593	0.00534297	0.419444	0.938687
cg03274391	0.226358	-0.00570517	0.0942758	0.00655696	0.016473	0.38441
cg09717146	0.0473018	-0.0110292	0.0279296	0.00480526	0.0904679	0.0218765
cg08709672	0.0515932	-0.000367505	0.0273548	0.00293233	0.0594521	0.900283
cg19713851	-0.104321	-0.00944931	0.076038	0.0061522	0.170279	0.124802
cg11621113	-0.00937839	-0.00630626	0.0268198	0.00332008	0.726618	0.0577299
cg24859433	-0.0411701	-0.000896819	0.0346629	0.00504522	0.235074	0.858942
cg25560398	-0.0389791	-0.00155019	0.0236293	0.00424048	0.0991501	0.714747
cg04885881	-0.0409367	0.000968353	0.0364206	0.00377118	0.261175	0.797392
cg14624207	-0.0562663	0.00414581	0.0207967	0.00305319	0.00687405	0.174746
cg03547355	-0.0717364	0.00258305	0.0230399	0.0034102	0.00187275	0.448918
cg16815882	0.0050297	0.00149597	0.0212188	0.00344441	0.812647	0.664128
cg03707168	-0.0871058	0.000609736	0.0324467	0.00428551	0.00732346	0.886882
cg21121843	-0.0650444	-0.0129896	0.0439519	0.00540393	0.13907	0.0163681
cg22117188	-0.0237608	-0.000497608	0.0163056	0.00283155	0.145185	0.860528
cg02532700	-0.0683505	-0.00789845	0.0448841	0.00440218	0.127997	0.0730141
cg26242531	0.0349977	0.000548992	0.023523	0.00306864	0.136965	0.858041
cg19888787	-0.0488614	0.0133088	0.0676619	0.0125971	0.470275	0.290935
cg24173182	0.0371164	-0.00407308	0.0307661	0.00402239	0.227812	0.311445
cg20810975	-0.00912108	0.00258091	0.018015	0.00311984	0.612689	0.408244
cg18503679	-0.187167	-0.0467725	0.244477	0.0336763	0.444014	0.165109
cg16556677	-0.023524	-0.0130568	0.0290294	0.00424182	0.417829	0.00212705
cg16145216	0.0452195	0.00153119	0.0442287	0.00347648	0.306754	0.65969
cg21949830	0.0240896	-0.00174079	0.0458343	0.00685385	0.599234	0.799547
cg11229399	0.0174641	-0.0056326	0.041113	0.00468616	0.671046	0.229596
cg26701785	0.154807	-0.0117813	0.0842101	0.00701196	0.0662052	0.0931688
cg10841124	0.0862627	0.00396248	0.0430165	0.0062311	0.0450554	0.524942
cg19798735	-0.0890175	0.00257253	0.0451471	0.00867173	0.0487486	0.766775
cg18404811	-0.0359016	0.003117	0.0259266	0.00405312	0.166271	0.442012
cg00871610	-0.0628992	-0.00495401	0.0305483	0.00391887	0.0396286	0.206407
cg01899089	-0.0130716	-0.00709624	0.0267502	0.00348738	0.625141	0.0420685
cg19572487	-0.0831466	-0.00368652	0.0341076	0.0049151	0.0148611	0.453366
cg09716613	0.0380992	-0.00135479	0.0335795	0.00423491	0.256687	0.749088
cg18758622	0.0064627	0.00376528	0.0194061	0.00288809	0.739149	0.192561
cg11730703	0.0596975	-0.00333096	0.051257	0.004812	0.244324	0.488924
cg08375941	-0.0979657	0.0145443	0.0544054	0.0108341	0.0718726	0.179568
cg13418576	0.0232806	-0.0067359	0.0340591	0.00532951	0.494339	0.206495
cg05284742	-0.0402819	-0.00149592	0.0207454	0.00333626	0.0522953	0.653952
cg03329539	-0.0732109	-0.00146892	0.0298071	0.0040858	0.0141273	0.719267
cg13185177	0.0405736	0.00630624	0.0375574	0.00472301	0.280142	0.182041
cg09197783	-0.00884253	0.000989104	0.0263545	0.00401741	0.737263	0.805563
cg27310319	0.0588277	-0.0087448	0.0347236	0.00589706	0.0903633	0.138341
cg10420527	0.0127691	-0.000256543	0.0178726	0.0022724	0.475037	0.910131
cg07180646	-0.00704448	-0.000987046	0.0364688	0.00294114	0.846856	0.737227
cg09662411	0.0102228	0.000159864	0.0451136	0.00523109	0.82076	0.975625
cg04551776	-0.0525289	0.00363215	0.0286106	0.00442776	0.0664928	0.412187
cg10251229	0.0128218	0.0012654	0.0239661	0.00355024	0.592708	0.721579
cg18092474	-0.111419	-0.00819917	0.0605722	0.00504923	0.0660411	0.10465
cg13247990	-0.00551307	0.00221616	0.0195644	0.00325647	0.778129	0.496284
cg01832549	-0.0154066	0.00228336	0.031089	0.00276395	0.620271	0.408885
cg08884752	-0.0320818	0.00210245	0.0267612	0.00380668	0.230737	0.580833
cg19713429	-0.0225009	-0.00157557	0.0344903	0.00371972	0.51424	0.671947
cg27241845	0.0200996	-0.0064079	0.032591	0.00395828	0.537494	0.10572
cg02385153	0.0279954	-0.00611879	0.0360743	0.00648579	0.437796	0.345646
cg11660018	-0.0988648	2.29069e-05	0.0280446	0.00264783	0.000434912	0.993099
cg21486510	0.0508474	-0.00139385	0.0212669	0.00337287	0.0168881	0.67949
cg16047567	-0.0860189	-0.00679379	0.0358494	0.00344746	0.0165319	0.0489758
cg00310412	0.0162762	0.000139166	0.0250307	0.00233552	0.515626	0.952494
cg05508862	0.00517031	-0.00142592	0.0213538	0.00233955	0.808711	0.542309
cg17372101	0.0371901	0.00141742	0.0332214	0.00388557	0.263093	0.715327
cg19956914	0.0266428	0.00117189	0.0457156	0.0031974	0.56012	0.714043
cg06644428	-0.512846	0.0289066	0.0798718	0.0109554	1.68507e-10	0.00842514
cg01882991	0.0161464	-0.00533135	0.0296483	0.00341583	0.586097	0.118821
cg15693572	0.207767	-0.00361904	0.0780798	0.00546291	0.00787641	0.507784
cg21322436	-0.108373	0.00700872	0.035094	0.00553682	0.00203895	0.205796
cg17287155	-0.136735	0.00419342	0.0451525	0.00689789	0.00248794	0.543342
cg05460226	-0.056486	-0.00338068	0.0315395	0.00466976	0.0734409	0.469226
cg05183538	-0.00979037	0.0031414	0.0452905	0.00673811	0.828877	0.641141
cg06459104	-0.14204	0.00293673	0.0664712	0.00479118	0.0327722	0.540021
cg23771366	-0.0847099	-0.00658739	0.0315366	0.00292525	0.00730493	0.0244986
cg01429256	-0.00247175	0.00186372	0.0133315	0.0022668	0.852926	0.411125
cg24389054	0.0455594	0.00497138	0.0415499	0.00532557	0.272998	0.350738
cg23067299	0.115979	-0.00683408	0.0673548	0.00989022	0.0852302	0.489694
cg11902728	0.0545199	0.00107761	0.0233628	0.00344819	0.0197083	0.754699
cg25212025	-0.0224311	-0.00460028	0.0378211	0.00338453	0.55321	0.174318
cg01873977	-0.0561728	-0.00390914	0.0440888	0.00571698	0.202786	0.494237
cg04517079	-0.0550239	-0.000487447	0.024236	0.00256349	0.023312	0.849221
cg18335991	0.00261102	-0.000243045	0.0239189	0.00370684	0.913084	0.947733
cg01756424	-0.00627392	0.00168694	0.0147517	0.00221287	0.670659	0.446001
cg08472795	-0.00697673	-0.00168483	0.0243829	0.00353018	0.774805	0.633253
cg05824218	0.0426708	-0.00466801	0.016697	0.00269131	0.0106647	0.0830742
cg25730428	0.0415396	0.00420441	0.0282783	0.00329652	0.14202	0.202391
cg07826859	-0.0139423	-0.0019224	0.0198538	0.00324562	0.482596	0.553751
cg00689360	-0.0256574	-0.00561965	0.0485952	0.00657189	0.59757	0.39265
cg15212295	-0.0425924	0.00669801	0.0295193	0.0050471	0.149188	0.184706
cg07339236	-0.0485276	-0.0100384	0.0530281	0.00927352	0.360214	0.279238
cg19254163	-0.0301117	0.00122041	0.0237202	0.00304737	0.204432	0.688869
cg19918734	-0.0619941	0.00101862	0.0252133	0.00423579	0.0140114	0.809996
cg12076915	-8.43157e-05	-0.00218621	0.0384403	0.00320663	0.99825	0.495501
cg06595162	-0.0181158	-0.00246276	0.0258953	0.00335759	0.484274	0.463392
cg15408734	-0.0462721	0.00046127	0.0292662	0.00429618	0.11401	0.914514
cg04044720	0.0397481	-0.00155915	0.0303856	0.00485793	0.190965	0.748302
cg26707709	0.156072	-0.000300046	0.0899296	0.007006	0.082857	0.965846
cg15342087	-0.0683242	0.00433446	0.0346863	0.00495424	0.0489962	0.381789
cg02980249	0.0588486	0.00162493	0.0247602	0.00275393	0.0175768	0.555271
cg24681208	0.00656031	0.00220311	0.0204762	0.00321742	0.748705	0.493627
cg03991871	-0.127091	-0.000397859	0.0562612	0.00529315	0.0240191	0.940095
cg18642234	-0.0592391	-0.00207495	0.0201897	0.00266783	0.00338383	0.436847
cg13500388	-0.0817704	0.00543482	0.0263513	0.00406937	0.00193954	0.181936
cg19593285	-0.0513832	0.00473744	0.0374063	0.0057603	0.16969	0.410986
cg04359840	-0.0898759	-0.000924557	0.0312536	0.00361238	0.0040789	0.798036
cg00563932	0.0351887	6.11716e-05	0.0217883	0.00277802	0.106472	0.982436
cg03999941	-0.00749045	-0.00139917	0.0411021	0.00587348	0.855413	0.811752
cg03604011	0.198808	-0.0144876	0.0919217	0.0130786	0.0306706	0.268181
cg12075928	0.0248138	-0.0117758	0.0396712	0.00661739	0.531713	0.0753888
cg10012530	-0.0225666	0.00291792	0.0260838	0.00410779	0.387044	0.477624
cg14906103	0.017193	-0.00594822	0.0267565	0.00424813	0.520565	0.161693
cg13832201	-0.055323	-0.00284814	0.028522	0.00333123	0.0525769	0.392719
cg00541303	0.0113762	-0.00468687	0.0318314	0.00426435	0.720839	0.271936
cg13127741	-0.0379147	-0.00297748	0.0273702	0.00327983	0.166144	0.364147
cg23110422	-0.0733959	-0.00576959	0.0462233	0.00691861	0.112463	0.404477
cg14012925	0.0751147	-0.00774937	0.0319015	0.00375792	0.01865	0.0393939
cg17971600	0.0112178	0.000486166	0.0130736	0.0022377	0.390948	0.828038
cg21140898	-0.0334386	-0.00189903	0.0660902	0.00851211	0.612948	0.823495
cg20303561	-0.0692851	-0.000652396	0.034194	0.00409474	0.0428853	0.873437
cg21393163	-0.0875066	0.00260733	0.0507442	0.00545863	0.084804	0.632979
cg01208318	-0.0542198	0.00223535	0.0543478	0.00463302	0.318607	0.629545
cg05673882	-0.0401273	-0.00456137	0.0423801	0.00443102	0.343854	0.303476
cg19372602	-0.0276688	-0.00933687	0.0345656	0.00555268	0.42352	0.0929039
cg16276850	-0.00115565	0.00412523	0.0198482	0.00343336	0.953575	0.229777
cg26764244	-0.0773743	-0.00903287	0.056325	0.00543861	0.16972	0.0969797
cg12758082	0.00313099	4.80095e-05	0.0174314	0.0026509	0.85747	0.985553
cg15892280	-0.0344203	-0.00111234	0.0162073	0.00248117	0.0338035	0.654001
cg23090529	-0.0764351	-0.00597223	0.0549879	0.00713229	0.164679	0.402552
cg04039397	-0.0857132	-0.00765227	0.0594017	0.00828423	0.149191	0.355804
cg00116430	-0.0730893	-0.0028816	0.0390718	0.00360744	0.061577	0.424558
cg09109520	0.0862598	0.00505114	0.042167	0.00374945	0.0409535	0.178159
cg26337070	-0.0977217	0.00285353	0.0589907	0.00520253	0.0978096	0.583451
cg10807309	0.075835	0.00529947	0.0343113	0.00335614	0.0272287	0.114572
cg12803068	0.102655	0.00670366	0.0878251	0.00549884	0.242657	0.223026
cg12423733	0.129497	0.00817458	0.0635157	0.00891658	0.0415967	0.359425
cg23351584	-0.0711615	0.00060714	0.030962	0.00532114	0.0216269	0.909177
cg27598208	-0.0186567	0.00155234	0.0303804	0.00426793	0.539214	0.716124
cg16834726	-0.0280793	0.00711276	0.0224863	0.00397121	0.211886	0.073524
cg25212453	-0.0420684	0.00724479	0.0559183	0.00801211	0.451944	0.366042
cg22403782	-0.123657	0.00943289	0.0551229	0.00430442	0.0250217	0.0285962
cg04521626	-0.0105556	0.00239738	0.0191433	0.0028484	0.581417	0.400139
cg00808648	0.00158726	0.00643375	0.0206691	0.00385895	0.938793	0.0957124
cg15159987	0.00577663	-0.000259009	0.021187	0.00302745	0.785149	0.931834
cg26282236	-0.0317173	0.00355824	0.0377948	0.00314032	0.401489	0.257389
cg02743070	0.00445639	-0.00293065	0.0199352	0.00334097	0.823131	0.380545
cg23480021	0.304063	-0.0109464	0.107458	0.0101961	0.0047184	0.28321
cg19427338	-0.0269981	-0.00314455	0.0338591	0.0042956	0.425337	0.464277
cg15600935	-0.00769376	0.00232457	0.0415147	0.00738319	0.852988	0.752929
cg04039799	0.00895908	-0.000725933	0.0223581	0.00322942	0.688676	0.82218
cg11263997	0.0100677	-0.00014616	0.0445894	0.0061131	0.82139	0.980929
cg02985540	-0.0101243	-0.00356163	0.0274732	0.00302871	0.712532	0.239827
cg07123182	-0.11512	0.00112437	0.0706905	0.0111275	0.103558	0.919531
cg23781467	0.0484944	0.00284084	0.0253882	0.00295213	0.0562775	0.336078
cg00687135	-0.0964551	0.000513967	0.0478762	0.00646972	0.0440734	0.936693
cg03188382	-0.0438294	0.00390273	0.028526	0.00305253	0.124607	0.201305
cg07626482	-0.0331696	-0.00131861	0.0246772	0.00261654	0.179084	0.614381
cg08396193	0.0369607	0.00378613	0.0393838	0.00596602	0.348103	0.525791
cg01901332	-0.0282041	-0.000189028	0.0332688	0.00388513	0.396682	0.961202
cg07967717	0.0485014	-0.00147101	0.0259256	0.00329018	0.0615271	0.654885
cg01062937	-0.00724477	0.00305644	0.0175434	0.00239005	0.679677	0.201192
cg02657160	-0.0898903	-0.000686059	0.0349731	0.00611497	0.0102207	0.910687
cg12101586	-0.0905883	-0.0103525	0.0662011	0.00602487	0.171385	0.0859814
cg06648759	0.0281742	-0.00158084	0.0270466	0.0034474	0.297688	0.646627
cg27286011	0.0414277	-0.00520552	0.0323986	0.00349774	0.201178	0.136926
cg17551891	1.22813e-05	0.00303627	0.0554471	0.00520725	0.999823	0.559941
cg02547394	0.0277408	0.001107	0.042547	0.00717567	0.514462	0.87742
cg05951221	-0.304325	0.00278058	0.0413291	0.00385598	2.85846e-13	0.470973
cg04704634	-0.0126994	0.00195024	0.0268328	0.00397972	0.636061	0.624184
cg03450842	-0.015621	0.00355282	0.0226777	0.00295407	0.491015	0.229315
cg11436113	0.0220462	-0.00441355	0.0234528	0.00345886	0.347311	0.202181
cg08266095	-0.0780395	0.00347255	0.0437234	0.00439885	0.0744678	0.430008
cg15417641	0.0583046	-0.0032573	0.068672	0.0062914	0.395992	0.604729
cg09701700	-0.032539	-0.00135285	0.0315468	0.00301765	0.302482	0.654003
cg02375409	0.0724821	0.00165461	0.036711	0.00375278	0.0485021	0.659359
cg05906166	-0.0606899	-0.00323917	0.0667741	0.00487754	0.363559	0.506745
cg03194226	-0.0126746	-0.00121966	0.031313	0.00503026	0.685684	0.808458
cg26361535	-0.124414	0.00568937	0.0440674	0.00393799	0.00481346	0.148774
cg13543915	-0.047506	0.00154588	0.0203081	0.00289731	0.0194157	0.593737
cg10592592	-0.0406227	-0.000576043	0.0352969	0.00339898	0.249949	0.865449
cg27178191	0.0151461	0.00151519	0.0176873	0.00245535	0.391919	0.537279
cg11071448	-0.0556519	0.00577596	0.0298639	0.00515697	0.0625096	0.262906
cg01692968	-0.110617	0.00231021	0.0394878	0.00585197	0.00513559	0.693074
cg00533649	-0.0150975	2.39893e-05	0.0285042	0.00232047	0.596424	0.991753
cg09762515	0.0436849	0.000815592	0.0302338	0.00503831	0.148621	0.871427
cg04324758	-0.0994656	0.00764068	0.0651402	0.00968052	0.12692	0.430088
cg24090911	-0.0536395	-0.00880042	0.0402551	0.0070832	0.182823	0.214298
cg07178945	0.0574076	0.000475399	0.0351979	0.00297846	0.103093	0.873211
cg24230340	-0.0295358	0.000903052	0.0432095	0.00400857	0.49436	0.821797
cg18961281	0.00629265	-0.00340944	0.0226036	0.0037209	0.780736	0.359683
cg25305703	-0.0300421	-0.00634306	0.0480954	0.00601565	0.532287	0.291884
cg08595501	0.0479258	-0.0040238	0.0505392	0.00908546	0.343075	0.657921
cg10919522	-0.0372568	-0.00374008	0.0344923	0.0052426	0.280196	0.475724
cg26703534	-0.0252367	0.000789725	0.0215381	0.00295158	0.241447	0.78908
cg00893603	-0.0210806	-0.00558314	0.054192	0.00479634	0.69733	0.244621
cg23126342	0.122343	0.00338996	0.0546139	0.00616773	0.0252046	0.582669
cg01127300	-0.0585199	0.000327605	0.0385682	0.00286279	0.1294	0.90891
cg20483374	0.0337504	0.000176247	0.0201026	0.0032178	0.0933086	0.956328
cg21611682	-0.0285846	0.00239154	0.021142	0.00257873	0.176532	0.353886
cg19719391	0.0427568	0.00201535	0.0273836	0.00361515	0.118592	0.5773
cg00378510	-0.0256402	0.00329781	0.0694305	0.00485675	0.711962	0.497249
cg26540191	0.00185253	0.00405551	0.0698177	0.0100631	0.978834	0.687021
cg03636183	-0.204891	0.0011439	0.0379195	0.00367021	7.51131e-08	0.755339
cg22851561	-0.0744969	0.00982836	0.0244417	0.00419905	0.00232924	0.019404
cg03220447	0.0445096	-0.00313661	0.0226249	0.00361452	0.0492724	0.385675
cg27332104	0.0298975	0.00361986	0.0270752	0.0038977	0.26962	0.353211
cg08038054	0.127306	-0.0129871	0.0395332	0.00541484	0.00130128	0.0166053
cg12876356	-0.0373091	0.000403705	0.0609007	0.00569648	0.540213	0.943513
cg25013095	-0.0433471	0.00152237	0.0623467	0.011911	0.486957	0.898317
cg13787850	-0.00893614	-0.00423628	0.0364146	0.00417638	0.806175	0.310608
cg07090714	-0.0511567	5.44614e-05	0.0355684	0.00379669	0.150541	0.988557
cg09247392	-0.00484522	0.00144513	0.021532	0.0034999	0.821981	0.679743
cg00295485	-0.086331	0.00163721	0.0310395	0.00417882	0.0054643	0.695278
cg12303084	-0.0333763	-0.00357749	0.0303432	0.0031728	0.271506	0.25972
cg24838345	-0.0882884	-0.0165749	0.0544185	0.00883111	0.104854	0.0607575
cg00968616	-0.0165126	0.00176449	0.0204394	0.00310458	0.419248	0.569894
cg15059804	0.0491554	-0.000363693	0.0439483	0.00373065	0.263533	0.922354
cg19838043	0.00947917	-0.00157767	0.0304487	0.00322981	0.755599	0.625297
cg16219322	0.0161317	-0.00102733	0.027056	0.00502059	0.551073	0.837899
cg23230929	0.0138835	0.00215222	0.0237188	0.00255471	0.558397	0.399689
cg07954423	-0.0356942	-0.00360542	0.0388026	0.00515258	0.357741	0.48422
cg05329352	-0.0449709	-0.000177355	0.0407063	0.00356396	0.269431	0.960318
cg13074055	-0.0278566	0.00290499	0.073555	0.0094736	0.70494	0.759167
cg02556928	-0.0307191	-0.000670431	0.0439354	0.00442064	0.484533	0.879479
cg21446172	0.00235466	4.25037e-05	0.0276944	0.0037011	0.932252	0.990839
cg16116321	-0.0114194	-0.00224821	0.0306442	0.00290202	0.709462	0.438654
cg16178855	-0.00294118	0.00107513	0.0214186	0.0028245	0.890793	0.703529
cg03004371	-0.0524631	0.00427666	0.0520505	0.0045459	0.313645	0.346997
cg09935388	-0.0998081	0.00368356	0.0606948	0.00572489	0.100283	0.52006
cg19940644	-0.0377518	-0.013095	0.0448846	0.00468542	0.400419	0.00526862
cg10691866	-0.0622445	-0.00276149	0.0439111	0.00361203	0.156537	0.444693
cg27312979	0.0590624	-0.00311149	0.0579257	0.00427379	0.308074	0.466722
cg11430077	0.0152774	-0.0107948	0.0523009	0.00642578	0.770238	0.0932118
cg12126344	-0.00633539	-0.00113521	0.0260479	0.0044228	0.807856	0.797473
cg10062919	-0.00597322	0.000414832	0.0154921	0.00209761	0.69986	0.843261
cg09465703	-0.0707565	-0.00900205	0.0722544	0.00762431	0.327586	0.237938
cg26703507	-0.039733	0.00323698	0.0352818	0.00485864	0.26023	0.505381
cg12474798	-0.0486584	0.000300224	0.0515822	0.00420587	0.345668	0.943105
cg01272202	-0.0637503	0.00504979	0.0283694	0.00404278	0.0247356	0.211859
cg06819357	-0.00165813	0.00456916	0.0338417	0.00375988	0.960927	0.224496
cg07381806	-0.0931028	-0.00337537	0.0553303	0.00873228	0.0925835	0.699161
cg24497361	-0.0268153	-0.00314173	0.0244037	0.00292638	0.271991	0.283207
cg08757670	0.0116024	-0.00404083	0.0220234	0.00383841	0.598365	0.292657
cg26669717	-0.0281443	0.00178785	0.020475	0.00295955	0.169412	0.545887
cg15542713	0.0633759	-0.00770097	0.063564	0.0061091	0.318892	0.20769
cg01218206	0.036431	0.00780538	0.0327266	0.0055092	0.265738	0.156785
cg01015663	-0.017943	-0.00099609	0.027123	0.00375101	0.508339	0.790626
cg22100563	-0.0300013	0.00080626	0.0347613	0.00550914	0.388194	0.883669
cg24996979	-0.0576395	0.00268255	0.0250609	0.00376688	0.0215435	0.476505
cg22635676	0.316549	-0.029722	0.173498	0.0127305	0.0682756	0.0197121
cg25197194	0.0192633	-0.00256617	0.0368053	0.00436249	0.60077	0.556476
cg16062877	-0.00744439	-0.000553732	0.0177635	0.00294352	0.675193	0.850813
cg00210249	0.0506667	0.00385917	0.0424693	0.00476154	0.233023	0.417808
cg27467282	0.0503054	0.00860815	0.0358816	0.00517473	0.161067	0.0964518
cg05677062	-0.02568	0.00325485	0.0368225	0.00398821	0.485646	0.414583
cg15498134	-0.0139653	-0.00142273	0.045327	0.00725753	0.758033	0.844614
cg09084391	-0.114877	0.00409832	0.0681698	0.00821192	0.0921261	0.617814
cg03254067	0.022667	-0.0035694	0.0297893	0.00500887	0.446786	0.47621
cg11094248	-0.0240137	-0.000669861	0.0195788	0.00343755	0.220121	0.845528
cg15963463	0.0106312	-0.000446704	0.0252463	0.00371498	0.673725	0.904309
cg01763916	-0.00779765	-0.0028086	0.0232458	0.00380526	0.737321	0.460597
cg06321596	-0.086571	0.00195015	0.0379716	0.0047939	0.0227244	0.684222
cg12513616	-0.0427765	0.00103861	0.0259634	0.0029258	0.0996196	0.722661
cg11701312	-0.0371631	-0.00217062	0.018319	0.00222282	0.0426355	0.328991
cg04858631	-0.0218439	-0.000187672	0.0356397	0.0063604	0.539992	0.976465
cg11390978	-0.0965586	0.012622	0.0631763	0.0115884	0.126539	0.27627
cg27262054	0.0361518	-0.00172846	0.0351866	0.00366517	0.304364	0.637298
cg24688690	-0.0234009	0.00102064	0.0156639	0.0024824	0.135331	0.68103
cg06369322	-0.0421711	0.000192878	0.0194462	0.00286537	0.0302231	0.946342
cg04673446	-0.000322324	0.00131863	0.0217025	0.00394655	0.988151	0.738342
cg19325791	0.0196462	-0.00324665	0.0328197	0.00545386	0.549491	0.551752
cg19744173	0.00519289	0.00177123	0.0234986	0.00324848	0.825125	0.585677
cg07029024	0.041463	0.000285961	0.0345963	0.0047196	0.230873	0.951695
cg25317941	0.0182836	0.00123629	0.0210204	0.00379534	0.384492	0.744673
cg25727671	0.0615585	-0.000510749	0.0541016	0.00897072	0.255306	0.954605
cg26850624	0.165468	-0.00417785	0.0602288	0.00413849	0.00608197	0.312921
cg13518625	-0.00729151	0.00924703	0.0835745	0.0126907	0.930484	0.466351
cg17566560	-0.040655	0.00501979	0.0266192	0.00505602	0.126814	0.320975
cg16611234	-0.0962242	-0.00384841	0.0473151	0.0052585	0.0421322	0.464395
cg16151538	-0.0111048	-0.0025214	0.0249194	0.00448498	0.655904	0.574084
cg04368724	0.0479945	0.0112781	0.0424316	0.00479985	0.258165	0.0189394
cg14264316	-0.0597358	-0.00257622	0.028379	0.00519801	0.0353964	0.62025
cg26151910	-0.0415765	0.00145615	0.0384209	0.00625704	0.279307	0.816015
cg26486070	-0.101677	0.00308774	0.0387885	0.0037542	0.0088398	0.410958
cg14254999	-0.0606741	-0.00644286	0.04538	0.00836823	0.181337	0.441487
cg00699986	0.0241639	-0.00394002	0.0276257	0.00461277	0.381833	0.393178
cg06688763	0.117341	-0.00151218	0.0752819	0.00587398	0.11928	0.796882
cg15700587	0.0382915	-0.00187844	0.0293055	0.00537216	0.191458	0.72665
cg03489965	0.109932	-0.000719711	0.0401998	0.00452204	0.00630711	0.873571
cg07413467	0.0559353	0.00153169	0.0419978	0.00397553	0.183094	0.700094
cg01731783	-0.0156445	0.00293158	0.0154235	0.00263283	0.31053	0.265711
cg06635952	0.0475707	0.00421625	0.0251529	0.00332013	0.0587364	0.204346
cg17087741	-0.0790657	0.00760662	0.0679135	0.0114635	0.244459	0.507099
cg20438687	-0.0600603	0.00606233	0.0329787	0.00377736	0.0687469	0.108758
cg07986378	-0.00347647	-0.0034178	0.0428674	0.00740307	0.935371	0.644393
cg22356527	0.000121078	-0.00182487	0.0303852	0.00555769	0.996821	0.7427
cg01839993	-0.034662	-0.000849082	0.0301853	0.00283775	0.251011	0.764829
cg13020466	-0.0203765	-0.00150286	0.0265793	0.00450641	0.443376	0.738815
cg01951879	0.032332	0.0137373	0.0427537	0.00587086	0.449595	0.01944
cg24931658	-0.000961711	0.00164266	0.0253958	0.00311757	0.969796	0.598349
cg16398761	-0.125546	-0.00307548	0.0614426	0.0103804	0.0411319	0.767064
cg26196424	0.0456927	-0.0125457	0.0362737	0.00542421	0.207928	0.020884
cg14563949	0.00360877	-0.00236106	0.019445	0.00306005	0.852784	0.440507
cg09554443	-0.0107886	-0.00116475	0.030422	0.00296488	0.722912	0.694495
cg07069636	-0.0245987	0.00123316	0.0211165	0.00253306	0.244209	0.626463
cg09560590	0.00920124	0.00529342	0.0333223	0.00347928	0.782483	0.128399
cg04907244	-0.0634868	-0.000678812	0.0551906	0.00523376	0.250183	0.896825
cg23576855	-0.19732	-0.00616554	0.145257	0.0059877	0.174554	0.303342
cg16519923	-0.0518769	0.00116509	0.0250025	0.00412976	0.0381087	0.777898
cg04806562	0.00214491	0.00114303	0.0182979	0.00272388	0.906695	0.674823
cg12619504	-0.0531733	0.00622523	0.0325648	0.002796	0.102703	0.0261527
cg09848445	0.082393	-0.0108993	0.0622145	0.0112501	0.185512	0.332812
cg26477856	-0.0130872	-0.000970297	0.017738	0.00284413	0.46071	0.733041
cg24556382	-0.0485136	-0.00679202	0.0462891	0.00527416	0.294754	0.198051
cg23401251	0.0288956	-0.00107606	0.0270036	0.00421175	0.284706	0.798385
cg19859270	-0.105649	0.0122785	0.0405189	0.00744543	0.00917664	0.099357
cg19459791	0.0486259	0.00954089	0.0371028	0.00459309	0.190162	0.0379755
cg11231349	-0.0711092	-0.0103044	0.052564	0.00749659	0.176264	0.169506
cg03399898	0.0039943	0.00686221	0.0632434	0.00517266	0.949649	0.184867
cg16255816	0.0117972	-0.00368724	0.0302697	0.00358481	0.696778	0.303876
cg10874644	0.172639	0.000477096	0.059595	0.00771491	0.00381166	0.950699
cg17668731	0.00749031	0.00567995	0.0188337	0.00333947	0.69088	0.08921
cg14435720	0.0597824	0.00671399	0.0793839	0.0121673	0.451482	0.581178
cg09658497	-0.13295	0.00610228	0.0939812	0.00801205	0.157371	0.446414
cg06885459	-0.0207079	-0.000501575	0.0347157	0.00329654	0.550924	0.87909
cg01207684	-0.0813288	0.00143752	0.0591338	0.0073436	0.169191	0.844836
cg08606254	0.0338064	0.00544878	0.0510491	0.0073971	0.507895	0.461492
cg00336149	0.0295634	0.0041219	0.0481008	0.00336275	0.538906	0.220516
cg21473814	0.00226805	0.00186962	0.0352422	0.00410406	0.948694	0.648787
cg18146737	-0.0854945	-0.00243956	0.166913	0.0156242	0.608574	0.875948
cg02583484	-0.0533297	-0.00552653	0.028621	0.00269931	0.062603	0.0408241
cg20357806	-0.00401219	0.0104372	0.0323315	0.00524554	0.901251	0.0468271
cg06972908	-0.0590739	-0.00457642	0.02567	0.00449341	0.0214594	0.30864
cg04701628	0.0112355	0.00396107	0.0187169	0.00325896	0.548372	0.224419
cg26718213	0.112103	-0.000974757	0.0816858	0.00506176	0.170162	0.847325
cg16201146	-0.00176817	-0.00572987	0.0283735	0.00437643	0.950316	0.190683
cg25748521	-0.0147244	-0.00490628	0.0232217	0.00389075	0.52609	0.20753
cg13193840	-0.191253	0.00927111	0.0622627	0.0116587	0.00215095	0.426635
cg20684110	-0.0408617	0.000848038	0.0447	0.00420117	0.360786	0.840061
cg15806304	0.0332393	-0.00197581	0.0253585	0.00334213	0.190088	0.5545
cg26844633	-0.0572471	0.00136437	0.0460024	0.00739347	0.213467	0.85362
cg03348792	0.0147027	0.00797123	0.0290498	0.00425856	0.612823	0.0614556
cg08035323	0.169055	-0.0118658	0.0476365	0.00435849	0.000398198	0.00656668
cg21188533	0.0340243	-5.65581e-05	0.0836762	0.00645139	0.684346	0.993007
cg23441210	0.0148893	-0.00155087	0.0278883	0.00517701	0.593465	0.764554
cg11557553	0.0434506	-0.00434405	0.0220684	0.00393375	0.0490753	0.269669
cg13428066	0.002327	0.00315717	0.0236797	0.00377698	0.921727	0.403373
cg13937905	-0.17304	0.00790623	0.0563219	0.0067105	0.00215573	0.238943
cg22407942	-0.0517055	-0.00581124	0.0477676	0.00412835	0.279226	0.159478
cg20295214	0.0133951	0.0105337	0.0341534	0.00577876	0.694942	0.0685571
cg26364091	0.00842715	-0.00626815	0.0228807	0.00302189	0.712683	0.0382514
cg26963277	-0.0998477	-0.013172	0.0587892	0.00668291	0.0896065	0.0489368
cg10678215	0.00693043	0.00918157	0.0387755	0.00594313	0.858164	0.122611
cg08972170	0.0114209	0.0202062	0.0380726	0.00527803	0.764225	0.000135136
cg10965178	0.0169386	0.00276112	0.0283248	0.00346637	0.549904	0.42586
cg01481251	-0.0290001	0.00962965	0.0541407	0.00844813	0.592259	0.254554
cg25949550	-0.0938667	0.00599234	0.0345111	0.00406601	0.00659299	0.14079
cg14580211	-0.0562589	0.00107971	0.0308518	0.00392112	0.0683811	0.783085
cg19816811	0.0235408	0.00601395	0.0444113	0.00328593	0.596147	0.0674488
cg24698211	-0.0190806	0.00434307	0.0319847	0.00364446	0.55088	0.233601
cg25921609	0.0175989	0.0100523	0.0362434	0.00487077	0.627322	0.0392363
cg20305005	-0.031822	0.00268999	0.0324531	0.00446967	0.326931	0.547391
cg10592478	-0.0910509	-0.00325027	0.0443674	0.00779149	0.0402572	0.676634
cg09975715	0.0363426	0.00709282	0.0349363	0.00591014	0.298328	0.230315
cg21869609	-0.0466267	0.0095726	0.0941698	0.0053563	0.620582	0.0741443
cg23842572	0.0307163	0.00622179	0.0278481	0.00425438	0.27015	0.143861
cg01744331	-0.14093	0.00761125	0.0718657	0.0112325	0.0499998	0.498138
cg16391678	-0.0438506	0.00255699	0.0233542	0.00375435	0.0605592	0.495949
cg08666707	-0.00819153	0.00115364	0.0203084	0.00319528	0.686725	0.718126
cg22876908	0.000553663	-0.00378635	0.0202085	0.0030126	0.978145	0.209045
cg23594345	-0.0322045	0.00106169	0.0550421	0.00565699	0.558567	0.851158
cg25292882	-0.00518784	-0.00141213	0.0432705	0.00771135	0.904577	0.854729
cg14817490	-0.0633014	0.00455175	0.0410497	0.0042532	0.123246	0.284734
cg26995224	-0.0901605	0.00671155	0.0532713	0.00330381	0.0907721	0.0424121
cg19089201	0.0850645	-0.0147999	0.105449	0.00888097	0.419971	0.0958587
cg02917867	-0.0174646	7.61991e-06	0.0247101	0.00324826	0.479789	0.998129
cg10403394	0.0222032	0.00570692	0.0693183	0.00509264	0.74878	0.262659
cg13038618	-0.0534478	0.00770592	0.0342231	0.00523203	0.118493	0.141035
cg11225089	0.00502947	0.00184464	0.0245063	0.00402766	0.837409	0.647033
cg10827488	0.0178541	0.00454374	0.0258088	0.00387631	0.489149	0.241342
cg03660377	-0.15446	0.0180555	0.0503279	0.00759512	0.0021742	0.0175875
cg10255761	-0.0357654	0.00219162	0.0271841	0.00302985	0.188457	0.4696
cg01097768	-0.0434578	-0.00423861	0.02547	0.00476534	0.0880868	0.373917
cg11666770	-0.000783482	-0.00862761	0.111935	0.00660476	0.994416	0.191691
cg17333042	0.0180163	-0.00296594	0.0218392	0.00254727	0.409508	0.244493
cg09469355	-0.00991095	-0.00146467	0.0238642	0.00284297	0.677967	0.606507
cg18900812	-0.0480591	-0.00986681	0.0490643	0.00853143	0.327428	0.247683
cg18295744	-0.0189277	0.000184953	0.0213409	0.0036599	0.37521	0.959704
cg02228160	0.0195635	0.00857707	0.0317947	0.00344234	0.538434	0.0128429
cg26788216	-0.0253721	-0.00934193	0.0333074	0.00446033	0.446295	0.0364122
cg11207515	0.118981	0.00456667	0.0503194	0.00596399	0.0181584	0.443991
cg20066188	-0.0658106	0.00171264	0.048077	0.00318688	0.171255	0.591081
cg01294327	-0.0358903	0.00508012	0.0684458	0.0042038	0.600109	0.227091
cg10750182	-0.0255127	0.00312298	0.0161097	0.00253598	0.113405	0.218371
cg11145461	-0.0184026	-0.00173287	0.0392114	0.00658847	0.638886	0.79258
cg16880946	0.0227579	0.00160863	0.0379186	0.00268438	0.54848	0.549108
cg00871371	-0.0340326	0.00743281	0.0234474	0.00325896	0.146811	0.0227267
cg08899667	0.06718	0.000611274	0.0268797	0.00296567	0.0125376	0.836733
cg11197630	-0.0474332	-0.00242053	0.0493994	0.00911556	0.337047	0.790636
cg26878655	-0.00986266	0.00925616	0.0290506	0.00537096	0.734261	0.0850573
cg08386009	-0.0303074	-0.000784778	0.0170576	0.00280093	0.0757377	0.779381
cg09022230	0.0276573	0.00225642	0.0326024	0.00370766	0.396374	0.542908
cg22937882	0.0235533	-0.00277968	0.0275167	0.00465476	0.392103	0.550497
cg03611151	0.0445704	-0.00400597	0.0308837	0.00445241	0.149124	0.368431
cg15636519	-0.00832032	-0.0053253	0.0447558	0.00763489	0.852535	0.485618
cg13582060	0.0170324	0.0105352	0.0609418	0.00833719	0.7799	0.20659
cg08947774	0.0761714	-0.00713956	0.0289486	0.00433602	0.00856733	0.0998876
cg00324097	-0.0217707	0.000149156	0.0175377	0.00259887	0.214608	0.954241
cg00911794	-0.0324295	0.00680893	0.0464076	0.00642698	0.484759	0.289604
cg12806681	-0.0557541	-0.00360875	0.046446	0.00651509	0.230121	0.57974
cg20873136	0.00330899	-0.00199965	0.0250704	0.00420905	0.895005	0.634807
cg14165660	0.0361151	0.00780238	0.0288835	0.00423848	0.211302	0.0658694
cg05517711	-0.00927046	-0.00403695	0.0177076	0.00261015	0.600659	0.122192
cg10179300	0.0102758	0.00779468	0.0415183	0.00559214	0.804546	0.163597
cg06294803	-0.0259893	-0.00728506	0.0464334	0.00627459	0.575739	0.24584
cg06151964	-0.00494642	0.00107292	0.0189603	0.002971	0.794206	0.71806
cg06394460	-0.025933	-0.0123361	0.0525196	0.00772477	0.621515	0.110519
cg06513247	0.000448583	-0.00161522	0.0161725	0.0025732	0.977874	0.530305
cg19406367	-0.00017483	0.00377536	0.0424736	0.00450071	0.996716	0.401716
cg03415545	0.00896593	-0.00878103	0.0545788	0.00853887	0.869529	0.30397
cg02101876	0.0555238	0.00829452	0.0497569	0.00900213	0.264571	0.357013
cg02556393	-0.00995545	0.00187865	0.0388182	0.00484358	0.797621	0.698181
cg25421530	0.0068517	0.00230654	0.0430341	0.00662796	0.873514	0.727896
cg01435643	-0.0141411	0.0054947	0.0551854	0.00500693	0.797793	0.272662
cg17814814	-0.0193679	0.00300856	0.021673	0.00332701	0.371613	0.366014
cg02013841	-0.0519408	0.00984472	0.0528922	0.00992138	0.326188	0.321248
cg06949439	-0.012463	-0.00113674	0.0317242	0.00325246	0.694477	0.726774
cg10520740	-0.0071392	-0.00431231	0.0178987	0.00281619	0.690029	0.125952
cg15482893	0.0317727	0.00353012	0.0352857	0.00524977	0.367986	0.501428
cg02782510	0.00140172	-0.00089278	0.0313331	0.00515657	0.964321	0.862572
cg14093127	-0.0276282	-0.0125704	0.0477631	0.00593315	0.563035	0.0343068
cg26790897	0.0272173	0.00745161	0.0297586	0.00441718	0.360502	0.0918509
cg01856529	0.0169513	-0.00214421	0.033371	0.00560592	0.611526	0.70216
cg05529343	0.162008	0.0108861	0.0808847	0.00865997	0.0453428	0.208962
cg02186444	0.0374883	0.000626716	0.0251571	0.00269683	0.136365	0.816272
cg14142087	0.0406104	0.00425629	0.0230868	0.00275295	0.0787412	0.122326
cg12547807	-0.0360682	0.000264752	0.0214847	0.00266542	0.0933614	0.920893
cg10825315	0.00483932	0.00266652	0.0311516	0.00518795	0.876561	0.607352
cg19589396	0.00767748	5.44978e-05	0.034486	0.00428188	0.823851	0.989847
cg08118908	-0.0112193	0.0073672	0.043614	0.00701391	0.797016	0.293745
cg00073090	-0.0506383	0.000294754	0.0229499	0.00298484	0.0274683	0.921352
cg01513913	-0.0309556	0.00120903	0.0303961	0.00267513	0.308643	0.65138
cg23973524	-0.000310097	0.00222235	0.0365198	0.00319466	0.993226	0.486775
cg13976502	-0.0214003	0.00195852	0.0199078	0.00304829	0.282504	0.520665
cg13525276	0.0302582	-0.00182971	0.0411136	0.00565514	0.461838	0.746332
cg13039251	0.119413	0.000979089	0.0506008	0.00539153	0.018391	0.855927
cg08149865	0.00890066	-0.00222038	0.0263955	0.00295533	0.736004	0.452602
cg25953130	-0.0496277	-0.00621665	0.0498143	0.00626578	0.319255	0.321305
cg00501876	0.00733654	-0.00263193	0.0209151	0.00337796	0.725788	0.436034
cg05969150	0.0210997	0.0011389	0.0188486	0.00225173	0.263107	0.613093
cg00976097	-0.098908	-0.00189428	0.168176	0.0107668	0.556542	0.860371
cg23565821	-0.0439009	-0.00166955	0.0273025	0.00379788	0.108003	0.660299
cg21161138	-0.0443139	-0.0049723	0.0295181	0.00401254	0.133449	0.215498
cg17619755	0.121764	0.000472674	0.0460511	0.00411347	0.00827196	0.908535
cg11152412	-0.0325666	0.000670912	0.0323976	0.00549615	0.314895	0.902863
cg16936060	0.0466211	-0.00303976	0.0292742	0.00368518	0.111425	0.409601
cg14712058	-0.0216494	0.00685657	0.0338109	0.00444105	0.522047	0.122855
cg24693803	0.023612	-0.00234701	0.0300658	0.00290833	0.432366	0.419816
cg12406027	-0.00843408	0.00163903	0.02389	0.00254021	0.724103	0.518889
cg17038235	0.00645129	0.00604346	0.0266847	0.00313743	0.808994	0.0542928
cg16503724	0.0179359	-0.00117275	0.0234492	0.00341614	0.444425	0.73143
cg26060489	-0.00160078	0.00482904	0.0210515	0.0036883	0.939393	0.190673
cg09607043	-0.0255161	-0.00109559	0.0386016	0.00602325	0.508674	0.855694
cg12873476	-0.0115943	-0.00333166	0.0389837	0.00321632	0.76619	0.300461
cg00085013	0.0300576	0.00346646	0.0238696	0.00358474	0.20808	0.33372
cg26529655	-0.0441169	0.00631399	0.0228351	0.00384257	0.053481	0.100591
cg19211853	-0.125694	-0.0082186	0.119162	0.0167438	0.291636	0.62362
cg02451831	-0.0111263	0.00726187	0.0279746	0.00421066	0.690869	0.0848326
cg06235438	-0.0888339	0.0059565	0.0271807	0.00486463	0.00109683	0.221005
cg02775417	-0.0829237	0.0205048	0.0684973	0.0124161	0.226158	0.098882
cg20059928	-0.0569323	0.00532208	0.0448772	0.00327898	0.204774	0.104813
cg10951873	-0.00213934	-0.00274958	0.0332881	0.00526493	0.948763	0.60159
cg25809905	0.0976585	-0.000384971	0.0437384	0.00358082	0.0257084	0.914402
cg16969872	-0.0574827	0.000360063	0.0380383	0.00435745	0.13092	0.934157
cg19046189	0.00837754	-0.000302552	0.0171778	0.00262586	0.625814	0.908289
cg23667432	-0.0158515	0.00151714	0.0207145	0.00367813	0.444206	0.680057
cg01005506	-0.0483905	0.00338285	0.0328165	0.00280898	0.140528	0.228693
cg14074174	-0.00294475	0.000703021	0.0216068	0.00228337	0.891609	0.758218
cg04956244	0.00984979	0.00431561	0.0164301	0.00260934	0.548902	0.0983852
cg03345925	0.00501831	0.00470602	0.0273466	0.00357273	0.854419	0.188001
cg27537125	-0.0467054	-0.000156343	0.0235911	0.00351208	0.0478543	0.9645
cg20902353	0.00447283	-0.00194398	0.018118	0.00267777	0.805031	0.46799
cg13784312	0.0260037	-0.00661201	0.134739	0.0246883	0.84698	0.78888
cg11902777	-0.138906	0.00382665	0.0619286	0.00627293	0.0250274	0.541952
cg21747070	-0.0223784	0.00354711	0.0352499	0.00313419	0.525617	0.25795
cg17024919	-0.152511	-0.0046689	0.0718042	0.00524775	0.0338362	0.373793
cg21566642	-0.391786	0.00309555	0.0530148	0.00486939	2.346e-13	0.525075
cg08763102	-0.0207246	0.00755253	0.0218181	0.00358983	0.342269	0.0355817
cg18754985	-0.110902	-0.00247978	0.047455	0.00933962	0.019515	0.790656
cg22132788	0.107466	-0.00408061	0.124885	0.0096302	0.389642	0.671836
cg03646329	-0.148845	0.00950074	0.061366	0.009354	0.0153681	0.309967
cg14120703	-0.0182281	-0.0019997	0.0165258	0.00275946	0.270138	0.468784
cg02336104	0.01911	0.000919463	0.0338069	0.00312498	0.571971	0.76863
cg04813697	-0.0274647	-0.00649486	0.0381349	0.00453811	0.471495	0.152618
cg03519879	-0.0112939	-0.00161558	0.0183066	0.00264781	0.537347	0.541866
cg27449150	0.00167849	0.000288555	0.0311246	0.00479295	0.956997	0.952002
cg04573702	-0.0247232	0.00205392	0.0229664	0.00324398	0.281833	0.526747
cg07465627	0.00633726	0.0048217	0.0243703	0.00391285	0.794856	0.218069
cg04970434	-0.018924	0.000304357	0.0281851	0.00365061	0.502035	0.933569
cg04383058	-0.0190374	-0.00678486	0.0296948	0.0045476	0.521525	0.135954
cg16702313	-0.017121	0.00176954	0.0191434	0.00349885	0.371217	0.613118
cg23198793	-0.0201341	0.00549854	0.0319985	0.00437636	0.529276	0.20919
cg09578155	-0.00803791	0.0026461	0.0156343	0.0023127	0.60722	0.252765
cg10788371	0.00127975	-0.0023728	0.0307788	0.00267522	0.96684	0.375268
cg20103692	0.0794019	0.000679302	0.0370784	0.00662938	0.0323366	0.918401
cg24741609	-0.0150219	0.00328929	0.0297065	0.00307188	0.61315	0.284475
cg22539182	-0.0178657	0.00303427	0.0250022	0.00240072	0.474978	0.206492
cg12836863	0.0362134	-0.00789275	0.0248895	0.00447057	0.145804	0.0777144
cg14977938	0.0373817	0.00411007	0.0317758	0.00349231	0.239587	0.239453
cg06433467	-0.0639772	-0.000500029	0.0651411	0.00774252	0.326165	0.948517
cg18991417	0.0505265	-0.000459387	0.029039	0.00386485	0.082024	0.905402
cg05957567	-0.0127292	0.000610291	0.0222738	0.00303003	0.567733	0.840407
cg02035751	-0.0312191	0.000410919	0.0202741	0.00302872	0.123745	0.8921
cg19847577	-0.0272685	0.00583526	0.0343133	0.00328149	0.42691	0.0756006
cg01442064	-0.0208401	-0.00179281	0.023696	0.00352499	0.37924	0.611118
cg15087369	-0.0237603	0.00350055	0.0333221	0.00513892	0.47589	0.495877
cg16983588	0.113701	-0.00425027	0.0431243	0.00423879	0.00845325	0.316188
cg14179389	-0.0312011	0.00195311	0.0610498	0.00609617	0.609366	0.74873
cg04258133	0.0339979	-0.00407578	0.039944	0.00481336	0.394803	0.397281
cg09099830	-0.0491596	-0.000333865	0.0301908	0.00291749	0.103656	0.90891
cg24719910	-0.0190397	0.0196567	0.0458777	0.00877261	0.678169	0.0252121
cg04018738	0.143006	0.00415606	0.0727937	0.00623448	0.0496461	0.505132
cg19825437	-0.0134501	-0.0015905	0.0306818	0.0036418	0.661166	0.662377
cg09570614	0.0192367	0.00384379	0.0238472	0.00263053	0.419968	0.144197
cg24158160	0.0263118	-0.00265651	0.0270212	0.00476733	0.33028	0.577464
cg21913886	-0.0383633	-0.00819933	0.0426726	0.00493693	0.368766	0.0969899
cg00835193	-0.0155659	0.00102501	0.0481741	0.00550436	0.746644	0.852304
cg23673974	-0.00560566	0.00346194	0.0224232	0.00396576	0.802613	0.382848
cg01668352	0.0137634	0.000638986	0.0328957	0.00656244	0.675694	0.922447
cg11253886	0.0836989	0.000502247	0.0352446	0.00316499	0.0176766	0.873939
cg18316974	-0.0292199	0.00216797	0.121441	0.0138509	0.809885	0.875646
cg18625627	-0.014279	0.000552802	0.0427808	0.00600987	0.738587	0.926726
cg07063068	-0.0387917	-0.0102188	0.0613844	0.00994371	0.527484	0.304299
cg26271591	-0.0408827	0.00973899	0.0461549	0.00722818	0.375836	0.178099
cg10814005	-0.0760332	-0.00412402	0.0393434	0.00545762	0.05343	0.45
cg24049493	0.0733093	0.00471942	0.0774008	0.00587194	0.34372	0.421702
cg03316752	-0.0163155	-0.00188022	0.0466456	0.007943	0.726538	0.812916
cg05302489	0.118844	-0.00562031	0.0461011	0.00533456	0.0100212	0.292282
cg12729894	-0.0145925	-0.00227759	0.0238332	0.00341009	0.540423	0.50432
cg03957124	-0.0440725	0.00323107	0.0214534	0.00357219	0.0400542	0.365896
cg11824827	-0.00845493	0.00348127	0.0274019	0.00334993	0.757697	0.298904
cg14089503	-0.0220543	0.00637574	0.0379998	0.0046275	0.56173	0.168509
cg19925780	0.0353096	0.00156676	0.042829	0.00614166	0.409788	0.798683
cg01017464	-0.041904	0.00341059	0.0411255	0.00497573	0.30837	0.493185
cg22845855	-0.0139779	-0.00347522	0.0431266	0.00620493	0.745884	0.575525
cg22870429	-0.0566083	0.00233654	0.0263238	0.00378116	0.0316334	0.536722
cg03109660	-0.0389042	0.000900601	0.024685	0.00408045	0.115155	0.825352
cg17924476	0.0640487	-0.00328115	0.04326	0.00388563	0.138924	0.398584
cg22891595	0.0229099	0.000735402	0.0241259	0.00311726	0.342436	0.813537
cg01940273	-0.182197	-0.00120691	0.0352232	0.00364915	2.58436e-07	0.740897
cg04716530	-0.0283384	-0.00275984	0.0293916	0.00472879	0.335066	0.559577
cg11554391	-0.148719	0.0102532	0.0387319	0.00512584	0.000127105	0.0456774
cg23233742	-0.0183841	0.00203075	0.0303094	0.00321383	0.544232	0.527577
cg25648203	-0.0497598	0.00165681	0.0333234	0.00445392	0.135533	0.709962
cg14675361	0.0343022	0.00242805	0.0468182	0.00652095	0.463845	0.709696
cg23219570	0.0409675	0.00359208	0.0305559	0.00365116	0.180171	0.325387
cg22998476	0.013518	-0.00628514	0.0272926	0.00332889	0.62045	0.0592493
cg27405731	-0.00265393	0.00591606	0.0330241	0.00419942	0.935957	0.159143
cg11690578	-0.0581864	0.000362178	0.035607	0.00503788	0.102385	0.9427
cg20244340	-0.100243	-0.000422323	0.0410047	0.00316022	0.0146117	0.89371

## Sheet: all results TSQL4
CpG site	cross-sectional coefficient TSQL 4	longitudinal coefficient TSQL 4	cross-sectional coefficient SE TSQL 4	longitudinal coefficient SE TSQL 4	cross-sectional coefficient pvalue TSQL 4	longitudinal coefficient pvalue TSQL 4
cg05575921	-0.19074	0.00200474	0.0900266	0.0104534	0.0342523	0.847946
cg23079012	0.019137	0.00595955	0.0712931	0.00976398	0.788399	0.541732
cg06126421	-0.145941	0.00266708	0.0491338	0.004443	0.00302009	0.54842
cg25512107	-0.0368412	0.00345138	0.050013	0.00955129	0.461413	0.717895
cg07251887	-0.00997562	-0.00560441	0.0236688	0.00315647	0.67346	0.0760465
cg14753356	-0.0563821	0.00230523	0.0258721	0.00351335	0.0294282	0.511856
cg25189904	-0.0615494	-0.00340131	0.0557426	0.00485171	0.269687	0.483395
cg15022400	-0.0349479	0.00300442	0.0297229	0.00374438	0.239828	0.42248
cg15187398	-0.0595713	-0.000591457	0.038171	0.0033291	0.118811	0.859016
cg05875421	-0.0682706	0.00885393	0.0326484	0.00555247	0.0366255	0.111044
cg13184736	-0.0421648	-0.000394397	0.0762294	0.00662337	0.580252	0.952526
cg23161492	-0.0658597	-0.00183445	0.0439188	0.0036159	0.133929	0.612011
cg09338136	-0.0767281	0.0029763	0.0315781	0.00383393	0.0152026	0.437712
cg12147622	-0.0286659	0.00312403	0.0308405	0.00430398	0.352746	0.468067
cg24540678	-0.0358825	0.00420667	0.0280239	0.00368219	0.200549	0.253484
cg07306253	0.0129593	-0.00757532	0.0217653	0.00379698	0.551624	0.0462438
cg15474579	-0.046187	0.00143406	0.0275873	0.00347773	0.0942527	0.680147
cg13399816	-0.0569331	-0.00155798	0.0389521	0.00333757	0.14405	0.640722
cg07202214	-0.0179168	0.00116724	0.030401	0.00355908	0.5557	0.742995
cg10380221	0.00904298	-0.00143814	0.0336725	0.00369716	0.788303	0.697354
cg25469474	0.00539581	0.0178624	0.07105	0.0118556	0.93947	0.132142
cg23916896	-0.064352	0.00389457	0.063781	0.00817287	0.313124	0.633782
cg04225775	-0.00341429	-0.0081701	0.0326527	0.00382752	0.916734	0.0329838
cg04180046	0.010711	-3.55282e-05	0.0406963	0.00312137	0.792438	0.99092
cg01836137	0.0443862	0.000920289	0.0284991	0.00318483	0.119539	0.772659
cg18446336	-0.0288568	0.00154637	0.0504822	0.003983	0.567662	0.697901
cg05194346	-0.0146952	0.00403037	0.0398464	0.00382953	0.712328	0.292794
cg02257517	0.0130764	0.00426321	0.0218989	0.00274532	0.550496	0.120693
cg19827923	-0.0163277	0.00489984	0.0197525	0.00336462	0.408539	0.145555
cg26856289	0.00844477	-0.000435892	0.0280662	0.00409939	0.76353	0.915336
cg19717773	-0.0907688	0.00190447	0.0744644	0.0053382	0.223057	0.721329
cg01439566	0.0251071	-0.00181652	0.0217845	0.00395965	0.249217	0.646485
cg13578465	0.129001	-0.000731698	0.0573358	0.00440903	0.0245986	0.868219
cg26077378	-0.043759	0.0166841	0.0625131	0.00662758	0.484025	0.0119432
cg03234777	-0.0220932	0.00719298	0.0405013	0.00517038	0.585478	0.164406
cg03440944	-0.0362332	0.00679166	0.0297688	0.00532771	0.223661	0.202615
cg03274391	0.142753	-0.00288905	0.0933677	0.00652649	0.126497	0.658082
cg09717146	0.0282708	-0.0136003	0.0277443	0.0047912	0.308315	0.00460103
cg08709672	-0.0251866	0.00467867	0.0270199	0.00292045	0.35139	0.10939
cg19713851	-0.0644565	-0.00115131	0.0753119	0.00612584	0.392209	0.850951
cg11621113	-0.00282622	0.00260864	0.0265868	0.0033078	0.915354	0.43047
cg24859433	-0.0153061	1.39542e-05	0.0342372	0.00500578	0.654877	0.997776
cg25560398	-0.0383992	0.00124307	0.0234801	0.00422863	0.102092	0.768831
cg04885881	-0.0269766	0.00303602	0.0360851	0.00375591	0.454817	0.41905
cg14624207	-0.0364437	0.00329093	0.0207512	0.00306149	0.0791952	0.282601
cg03547355	-0.043475	0.00454621	0.0228599	0.00339882	0.0573305	0.181266
cg16815882	0.0294597	-0.0033679	0.0210636	0.00343379	0.162064	0.32687
cg03707168	-0.0750714	-0.00387648	0.0321737	0.00427012	0.0197318	0.364146
cg21121843	0.0366569	-0.0232842	0.0435689	0.00538377	0.400257	1.64351e-05
cg22117188	-0.00880076	0.00487404	0.0161976	0.00282332	0.586946	0.084523
cg02532700	-0.055478	0.00360157	0.0444657	0.00440727	0.212334	0.413973
cg26242531	0.0215906	-0.00126077	0.023323	0.00304365	0.354706	0.678774
cg19888787	0.00871072	0.000997167	0.0672632	0.0125632	0.896971	0.936749
cg24173182	0.0450119	-0.00157363	0.0306328	0.00402621	0.141887	0.695977
cg20810975	0.00142189	-0.00429752	0.0179971	0.00312202	0.937034	0.1689
cg18503679	-0.135035	0.0432917	0.242457	0.0335542	0.577627	0.197214
cg16556677	-0.0155682	-0.00141463	0.0286655	0.00417015	0.58712	0.734494
cg16145216	-0.0297432	0.00272624	0.0438076	0.00346151	0.497272	0.431082
cg21949830	0.0314214	0.0123793	0.0454781	0.00689049	0.489695	0.0726364
cg11229399	0.0215226	0.000973829	0.0407443	0.00466803	0.597401	0.83478
cg26701785	0.0716883	-0.00674688	0.0835616	0.00702109	0.391076	0.336762
cg10841124	0.0138631	0.0046459	0.0426762	0.00621048	0.745332	0.454552
cg19798735	-0.055158	0.00769378	0.0448961	0.00864897	0.219345	0.373865
cg18404811	-0.00471439	-0.00537128	0.0257341	0.00404057	0.85466	0.183972
cg00871610	-0.034578	-0.00282099	0.0302872	0.00390456	0.253733	0.470126
cg01899089	-0.0363921	0.00194296	0.0265145	0.00347425	0.170054	0.57609
cg19572487	-0.075681	0.00687017	0.0338361	0.0048984	0.0254113	0.160996
cg09716613	0.0661175	-0.000683788	0.0331548	0.00417817	0.0462732	0.870027
cg18758622	0.0112713	-0.0035005	0.0192549	0.0028784	0.558357	0.224162
cg11730703	0.0903826	0.00120088	0.0505504	0.00473915	0.0739688	0.800003
cg08375941	0.0325936	-0.00854912	0.0541285	0.0108726	0.547126	0.431762
cg13418576	-0.00419145	-0.00585283	0.0338056	0.00529037	0.901337	0.268793
cg05284742	-0.035467	0.00206232	0.0206985	0.00333938	0.0867559	0.536963
cg03329539	-0.0479782	0.00167471	0.0295607	0.00408998	0.104736	0.682266
cg13185177	0.00475457	0.000642054	0.0373861	0.00472867	0.898815	0.892017
cg09197783	0.00954293	-0.00548332	0.0261534	0.00402116	0.715233	0.172923
cg27310319	0.0500235	-0.012223	0.0341047	0.00582124	0.142571	0.0359473
cg10420527	0.00575917	-0.00230503	0.0177189	0.00225253	0.745195	0.306354
cg07180646	-0.0613037	-0.000310682	0.0361226	0.00292705	0.0898803	0.915486
cg09662411	-0.00789694	0.00012715	0.0447112	0.00521094	0.859826	0.980537
cg04551776	-0.00097886	-0.00337559	0.0283939	0.00445074	0.972502	0.448328
cg10251229	-0.0117766	-0.00442623	0.0237789	0.00355354	0.620472	0.213144
cg18092474	-0.165657	-0.0146841	0.0599948	0.00502694	0.00582706	0.0035483
cg13247990	0.00274731	0.0035249	0.0195258	0.00324631	0.888118	0.277764
cg01832549	-0.0283882	6.30913e-05	0.0307947	0.00275208	0.356745	0.981714
cg08884752	-0.0295154	-3.18807e-05	0.0265429	0.00376456	0.266272	0.993244
cg19713429	-0.0825869	-0.000149734	0.0341758	0.00370492	0.0157723	0.967769
cg27241845	0.0324897	-0.00788264	0.0323053	0.00394338	0.314688	0.0458216
cg02385153	0.0416166	0.000940805	0.0360397	0.00648963	0.248306	0.884757
cg11660018	-0.0576421	-0.00154291	0.0277811	0.00263664	0.0381576	0.558527
cg21486510	0.00552146	-0.00142361	0.0211112	0.0033625	0.793698	0.67209
cg16047567	-0.0493965	9.46657e-05	0.0356036	0.00343254	0.165507	0.978002
cg00310412	-0.0147014	0.00174655	0.0248531	0.00233816	0.554247	0.455215
cg05508862	0.0146777	-0.0034344	0.0211595	0.00233032	0.487983	0.140782
cg17372101	-0.00768943	0.00365135	0.0329263	0.00387039	0.815373	0.34565
cg19956914	-0.014596	0.00604963	0.0452129	0.00314555	0.746871	0.0546687
cg06644428	-0.324357	0.00216048	0.0792129	0.0109171	4.39203e-05	0.843156
cg01882991	-0.0502469	0.000681943	0.0292781	0.00338548	0.0862991	0.840393
cg15693572	0.0601186	0.00353079	0.0773275	0.0054376	0.437015	0.516241
cg21322436	-0.041598	-0.00426663	0.0348348	0.00554243	0.232544	0.44155
cg17287155	-0.0341878	0.00329298	0.0448068	0.00687582	0.445543	0.632076
cg05460226	0.0209285	-0.00189782	0.0312932	0.00465419	0.503703	0.683514
cg05183538	-0.016934	0.00545794	0.0449358	0.00671537	0.706323	0.416508
cg06459104	-0.0492097	0.00772456	0.0658315	0.00476944	0.454875	0.105564
cg23771366	-0.0787134	-0.00108756	0.0311686	0.00291289	0.0116536	0.708943
cg01429256	0.000974396	-0.00155851	0.0131672	0.00225113	0.941015	0.488859
cg24389054	-0.082998	0.00517579	0.0413542	0.00533146	0.044887	0.331826
cg23067299	0.0414066	-0.00293394	0.0668179	0.00985667	0.535526	0.76601
cg11902728	0.0205399	-0.000607108	0.0231802	0.00343666	0.375665	0.859806
cg25212025	-0.0387183	0.00461941	0.0374625	0.00337022	0.301518	0.170721
cg01873977	-0.0373174	-0.00119716	0.0437098	0.00567013	0.393347	0.832816
cg04517079	-0.0392423	0.00330412	0.0240155	0.0025396	0.102435	0.193478
cg18335991	-0.00458688	0.00592777	0.0236156	0.00369308	0.846013	0.108715
cg01756424	-0.00104142	0.00143086	0.0147322	0.0022187	0.943651	0.519099
cg08472795	-0.0157658	0.00372731	0.0241913	0.00351779	0.514656	0.289541
cg05824218	0.000947746	-0.0014074	0.0166621	0.00269337	0.954645	0.601383
cg25730428	0.0334938	-0.000288282	0.0280287	0.00326554	0.23225	0.929668
cg07826859	-0.000794537	0.00551221	0.0197128	0.00323561	0.967853	0.0886969
cg00689360	-0.0846883	-0.00253528	0.0481887	0.0065188	0.0789974	0.697401
cg15212295	-0.00254451	0.00351767	0.0293233	0.00503173	0.930858	0.484616
cg07339236	0.0109123	-0.0222185	0.0526804	0.0092465	0.835916	0.0164044
cg19254163	-0.0459614	0.00314512	0.0234374	0.00302229	0.0500195	0.298237
cg19918734	-0.048012	0.00442395	0.0249121	0.00420912	0.0540669	0.293438
cg12076915	0.0121299	-0.00612858	0.0380738	0.00319254	0.750082	0.0551204
cg06595162	-0.0121258	-0.00114543	0.0256752	0.00334544	0.636783	0.732117
cg15408734	-0.014774	0.00373172	0.029168	0.00431631	0.612548	0.387438
cg04044720	0.0233114	-0.00215029	0.030162	0.00486375	0.439678	0.658488
cg26707709	-0.0307436	-0.00219333	0.0889334	0.00693945	0.729622	0.752002
cg15342087	-0.00325692	-0.00689634	0.034253	0.00489323	0.924257	0.158967
cg02980249	0.00831452	5.1297e-05	0.0244685	0.00268135	0.734046	0.98474
cg24681208	0.0100325	-0.000926817	0.020325	0.0032074	0.621633	0.772657
cg03991871	-0.034568	0.00470372	0.0557329	0.00527088	0.535184	0.372345
cg18642234	-0.0508888	0.000548135	0.0201024	0.00267074	0.0114348	0.837419
cg13500388	-0.0234723	0.00238855	0.0260121	0.00404242	0.366963	0.554711
cg19593285	-0.00396193	0.00703923	0.0373079	0.0057417	0.915437	0.220431
cg04359840	-0.0526057	0.00564734	0.0309751	0.00359835	0.0896193	0.116792
cg00563932	0.0318679	-0.000322263	0.0216115	0.00276805	0.14049	0.907336
cg03999941	-0.00253359	-0.00196994	0.0411539	0.00593307	0.950916	0.739925
cg03604011	0.201774	-0.0194221	0.091182	0.0130338	0.0270142	0.136432
cg12075928	-0.0206623	0.000475403	0.0393919	0.00659748	0.599958	0.942567
cg10012530	-0.0723596	0.00576664	0.025888	0.00409478	0.00523215	0.159287
cg14906103	-0.007502	-0.00118886	0.0265608	0.00423474	0.777627	0.778954
cg13832201	-0.0746815	-0.00050955	0.0281847	0.00328527	0.00812635	0.876766
cg00541303	-0.0199611	0.00314356	0.031705	0.00430757	0.529035	0.465658
cg13127741	-0.00769655	-0.00452026	0.0271283	0.00326726	0.776665	0.166753
cg23110422	-0.00679033	-0.00382339	0.0453833	0.00683773	0.881077	0.576149
cg14012925	-0.00809475	-0.0018397	0.0316187	0.00374378	0.797971	0.623227
cg17971600	0.00887645	-0.000819642	0.013054	0.00223045	0.496584	0.713321
cg21140898	-0.0272236	0.00347156	0.0655154	0.00843991	0.677801	0.680903
cg20303561	-0.0328766	0.00320416	0.0338929	0.00407928	0.332167	0.43232
cg21393163	-0.00742779	0.00321332	0.0502798	0.00543725	0.882574	0.554636
cg01208318	0.0207616	-0.00731078	0.0538312	0.00461281	0.699787	0.113237
cg05673882	-0.020773	0.00375534	0.0419906	0.00441315	0.620871	0.394958
cg19372602	-0.0103263	0.00414278	0.0341619	0.00551295	0.76247	0.45251
cg16276850	0.0277747	-0.00549522	0.019833	0.00343649	0.161511	0.110053
cg26764244	0.00444757	-0.00477712	0.0557979	0.00541591	0.936479	0.377912
cg12758082	-0.00956533	0.0015665	0.017299	0.00261868	0.580361	0.549809
cg15892280	0.00692435	-0.00270868	0.0160831	0.00245196	0.666849	0.269498
cg23090529	-0.0914576	-0.00169955	0.0541138	0.0071436	0.0911716	0.811988
cg04039397	0.0435893	-0.0242383	0.0581213	0.00794497	0.453361	0.00233018
cg00116430	-0.0608964	-0.000888374	0.0388045	0.00364004	0.11677	0.807226
cg09109520	-0.0285893	0.00706063	0.0417678	0.00373348	0.493771	0.058824
cg26337070	-0.0781256	-0.00191855	0.0584328	0.00514981	0.181412	0.709547
cg10807309	0.0509333	-0.00897481	0.0339899	0.0033422	0.1342	0.00733949
cg12803068	0.007844	-0.00761354	0.0869783	0.00547264	0.928154	0.164403
cg12423733	0.106166	0.00348755	0.0629956	0.00888464	0.0920862	0.694726
cg23351584	-0.0194696	-0.00415157	0.0307561	0.00530551	0.526773	0.434063
cg27598208	-0.0484038	-0.000727106	0.030134	0.00425314	0.108364	0.864284
cg16834726	0.00273651	0.00253897	0.0224734	0.00396038	0.903094	0.52158
cg25212453	0.0694493	-0.00209147	0.0554971	0.00798286	0.210926	0.793367
cg22403782	-0.0951991	0.00296013	0.0545968	0.00428512	0.0814182	0.48982
cg04521626	-0.00594487	-0.00175687	0.0188958	0.00281476	0.753086	0.532636
cg00808648	0.00157864	-0.000928133	0.0205505	0.00384845	0.938775	0.809462
cg15159987	0.0216549	0.00246257	0.021017	0.00304446	0.302964	0.418739
cg26282236	0.00888733	0.00282368	0.0374343	0.0031265	0.812369	0.366617
cg02743070	0.00483516	0.00226478	0.019797	0.00331758	0.807068	0.494943
cg23480021	0.263669	-0.00165155	0.106435	0.0100574	0.0133411	0.86959
cg19427338	-0.0248825	-0.00098685	0.0335666	0.00432079	0.45861	0.819375
cg15600935	-0.024063	0.00511636	0.0414827	0.0074166	0.561918	0.490409
cg04039799	0.0264407	-0.00544775	0.0221801	0.00321833	0.233361	0.0907499
cg11263997	0.00639862	0.000216785	0.0442215	0.00609169	0.884966	0.971617
cg02985540	0.0153358	-0.00182144	0.0272243	0.00301677	0.573293	0.546102
cg07123182	-0.0427164	0.0138798	0.0701577	0.0111367	0.542676	0.212871
cg23781467	0.0105878	-0.000709726	0.0250701	0.00294106	0.672837	0.809348
cg00687135	-0.013757	0.00891536	0.0474724	0.00644573	0.772007	0.166861
cg03188382	-0.0287773	0.00494116	0.0281014	0.0030551	0.305958	0.106058
cg07626482	-0.0286043	0.00320057	0.0245251	0.00263341	0.243645	0.224448
cg08396193	-0.0957786	0.0129121	0.0390821	0.00594648	0.0143351	0.0300824
cg01901332	0.0139985	-4.78646e-05	0.0328539	0.00383006	0.670099	0.990031
cg07967717	0.0354607	-0.00281583	0.0256055	0.00326218	0.16625	0.388203
cg01062937	-0.0223074	0.00153629	0.0172503	0.00239264	0.196105	0.520928
cg02657160	-0.0420695	-0.00341361	0.0347435	0.00609739	0.226065	0.575681
cg12101586	-0.150854	-0.0117489	0.065576	0.00599891	0.0215507	0.0503849
cg06648759	0.00991881	-0.00423703	0.026815	0.00343484	0.711499	0.217596
cg27286011	0.0546898	0.00224753	0.032007	0.0034833	0.0876893	0.518892
cg17551891	-0.0550072	0.0051279	0.0547987	0.00518503	0.315624	0.322862
cg02547394	-0.0642979	-0.00251625	0.0420458	0.00712771	0.126339	0.72413
cg05951221	-0.207901	0.00639211	0.0409394	0.0037997	4.25485e-07	0.09276
cg04704634	-0.0257533	0.00111443	0.0266233	0.00396645	0.333492	0.778782
cg03450842	-0.0220085	0.00189401	0.0225759	0.00298529	0.329746	0.525898
cg11436113	-0.02924	0.00586582	0.0232691	0.00344734	0.209034	0.0890807
cg08266095	-0.0614749	-0.000689469	0.0432118	0.00433303	0.155027	0.873599
cg15417641	0.119837	-0.00130455	0.0680247	0.00629868	0.0783167	0.835952
cg09701700	-0.0551449	0.00348816	0.0312649	0.00300758	0.0779545	0.24635
cg02375409	0.0570987	0.00350759	0.0362484	0.00370683	0.115397	0.344199
cg05906166	-0.147807	0.0103732	0.0661334	0.00489273	0.0255671	0.0341861
cg03194226	-0.025695	0.000519761	0.0310863	0.00501451	0.408566	0.917462
cg26361535	-0.0584375	0.00314588	0.0436507	0.00392085	0.180844	0.422502
cg13543915	-0.0242094	0.00516444	0.0200573	0.00287422	0.227564	0.0725981
cg10592592	-0.0453776	0.00235622	0.0349656	0.00338482	0.194547	0.486484
cg27178191	0.00687668	0.000739103	0.0176596	0.00246189	0.697019	0.764059
cg11071448	-0.0425219	0.00139733	0.029664	0.0051417	0.151857	0.785846
cg01692968	-0.0729801	0.00329676	0.0391801	0.00583258	0.062643	0.572013
cg00533649	-0.0284086	0.00242479	0.0281754	0.00230998	0.31348	0.294053
cg09762515	-0.018404	-0.00287931	0.0303469	0.00499156	0.544272	0.56415
cg04324758	-0.1476	0.0239829	0.0643441	0.00964688	0.0218909	0.0130402
cg24090911	-0.0791649	0.0101139	0.0399968	0.00706295	0.047895	0.152395
cg07178945	-0.0172706	-0.000549693	0.0348628	0.00296545	0.620396	0.852971
cg24230340	-0.0669988	0.00523595	0.0428044	0.00397456	0.117727	0.187952
cg18961281	0.00755957	0.000834013	0.0224442	0.00370947	0.736286	0.822144
cg25305703	-0.0374651	0.00896054	0.0476792	0.00599348	0.432098	0.135146
cg08595501	0.00102654	-0.0127062	0.0502131	0.00896912	0.983691	0.156821
cg10919522	0.00219859	0.0052578	0.0340597	0.00518098	0.948537	0.310378
cg26703534	0.0362933	-0.00081798	0.0214531	0.00295445	0.0908468	0.781929
cg00893603	0.0368995	0.00621881	0.0536791	0.00477576	0.491926	0.193093
cg23126342	0.0514138	0.00117324	0.0541213	0.00614362	0.342255	0.84858
cg01127300	-0.0671245	0.00333965	0.0381977	0.00284979	0.079073	0.241455
cg20483374	0.0287659	-0.0074309	0.0199565	0.0032079	0.149599	0.0206929
cg21611682	-0.0241935	0.00238457	0.0209554	0.00255575	0.248433	0.350983
cg19719391	0.010033	0.003355	0.0271505	0.00358486	0.711771	0.349512
cg00378510	-0.0529215	0.00235985	0.0687619	0.00486222	0.441641	0.627516
cg26540191	-0.0363227	0.00654346	0.0692223	0.0100301	0.599833	0.514294
cg03636183	-0.0693557	-0.00134344	0.037565	0.00365489	0.0650323	0.713253
cg22851561	-0.0425737	0.0138579	0.0244211	0.00420276	0.081405	0.00100264
cg03220447	0.00896799	0.00194532	0.0224601	0.0036032	0.68972	0.589369
cg27332104	0.0595412	-0.00202518	0.0270015	0.00387859	0.0275573	0.601661
cg08038054	0.0453193	-0.0042023	0.0393761	0.00542063	0.249893	0.438337
cg12876356	-0.0255518	0.00226826	0.0606188	0.00570201	0.673433	0.690844
cg25013095	0.0767153	0.00191664	0.0616132	0.0117388	0.213205	0.870328
cg13787850	0.00903621	0.00261272	0.0360892	0.00416029	0.802318	0.530105
cg07090714	-0.0290736	0.00386842	0.0350321	0.0037228	0.406704	0.298948
cg09247392	-0.0208866	0.00564747	0.0214895	0.00351759	0.33118	0.108627
cg00295485	-0.0190749	0.00695179	0.0306589	0.00414454	0.533905	0.0937163
cg12303084	-0.0413022	0.00147348	0.0300641	0.00315986	0.169686	0.641071
cg24838345	-0.00944658	-0.00470251	0.0540288	0.00880401	0.861218	0.593341
cg00968616	0.0092038	0.00119183	0.0202842	0.00310048	0.650059	0.700744
cg15059804	0.057019	-0.00629594	0.0434502	0.00369385	0.189618	0.0885392
cg19838043	0.0218049	-0.000242187	0.0300843	0.00318212	0.468677	0.939345
cg16219322	0.0471179	-0.015634	0.0268968	0.00500715	0.0799278	0.00183365
cg23230929	-0.021625	0.00478219	0.0235025	0.00253134	0.357641	0.0590898
cg07954423	-0.00577786	-0.00198683	0.0384749	0.00513391	0.880644	0.698818
cg05329352	-0.0671474	0.00261644	0.0403201	0.00354849	0.0960402	0.461049
cg13074055	0.0607324	-0.00651944	0.0729135	0.0093089	0.404987	0.483843
cg02556928	-0.037718	0.00626762	0.0435281	0.00440252	0.386329	0.154789
cg21446172	0.000261062	-0.00434595	0.0274623	0.00368791	0.992416	0.23884
cg16116321	-0.0169503	-0.00250777	0.0303606	0.00288923	0.576718	0.385571
cg16178855	0.024481	-0.00188663	0.0212401	0.00282709	0.249221	0.504673
cg03004371	-0.00605903	0.00471313	0.051556	0.00452601	0.906461	0.297912
cg09935388	-0.0691619	0.00943765	0.0601258	0.00570055	0.250196	0.098053
cg19940644	-0.0760379	0.0063955	0.0444708	0.00464046	0.0874787	0.168379
cg10691866	-0.0629304	0.00398945	0.0434914	0.00359611	0.148112	0.267473
cg27312979	-0.0448114	0.00528833	0.0573685	0.00425393	0.434859	0.214033
cg11430077	-0.0272323	0.000445477	0.0518451	0.00640203	0.599462	0.944536
cg12126344	0.0134808	0.000740757	0.0257338	0.00442592	0.600429	0.867107
cg10062919	-0.0228138	0.00124788	0.0153008	0.00208029	0.136113	0.548707
cg09465703	-0.0896209	0.0101933	0.0713818	0.00755325	0.209465	0.177406
cg26703507	-0.0191411	0.0100092	0.0351515	0.00486419	0.586135	0.0398142
cg12474798	-0.0754904	0.00710479	0.051176	0.00420956	0.140387	0.0916971
cg01272202	0.00428096	0.00142745	0.0281416	0.00402894	0.879106	0.723174
cg06819357	-0.00126648	0.00300725	0.0335354	0.00374504	0.969879	0.422126
cg07381806	-0.0484724	-0.00581984	0.0549001	0.00855691	0.377378	0.496546
cg24497361	-0.0290505	0.00193237	0.024191	0.00291476	0.229952	0.507476
cg08757670	0.0246308	-0.00106567	0.0218794	0.00382727	0.260379	0.780718
cg26669717	0.00480327	0.00416727	0.0204033	0.00294926	0.813908	0.157903
cg15542713	-0.0374468	0.0103651	0.0629703	0.00611621	0.552143	0.0903748
cg01218206	-0.0284443	0.0138408	0.0325	0.00549267	0.381549	0.0118598
cg01015663	0.00743966	0.000394614	0.0269032	0.00373729	0.782165	0.915925
cg22100563	-0.000228589	-0.00365635	0.0348784	0.00553975	0.994771	0.509358
cg24996979	-0.0392898	0.00415805	0.0248676	0.00375458	0.11426	0.268298
cg22635676	-0.0617075	-0.0171071	0.171823	0.0125298	0.719546	0.172394
cg25197194	0.0425122	0.00468091	0.0364799	0.00434588	0.244024	0.281639
cg16062877	-0.00515091	0.0042211	0.0176389	0.00292225	0.770297	0.148852
cg00210249	0.0322109	0.000521302	0.0420832	0.00471699	0.44413	0.912018
cg27467282	0.0145086	0.0089551	0.0355958	0.00515714	0.683614	0.0827209
cg05677062	-0.060881	-0.000942573	0.0364873	0.00397215	0.0953864	0.812465
cg15498134	-0.0596249	0.00983218	0.0452647	0.00727708	0.187887	0.176898
cg09084391	-0.172074	0.0107051	0.0678247	0.0082211	0.01126	0.193095
cg03254067	-0.000469795	0.008691	0.0295853	0.00499416	0.987332	0.0820547
cg11094248	-0.0278265	-0.000729947	0.0194427	0.00341354	0.152498	0.830707
cg15963463	-0.0444984	0.00746302	0.0250512	0.00375197	0.0758276	0.046903
cg01763916	-0.00809264	-0.00389928	0.023079	0.00379348	0.725883	0.304192
cg06321596	-0.0524168	0.0098453	0.037644	0.00477623	0.163953	0.039471
cg12513616	0.000754409	-0.00323837	0.0258127	0.00292908	0.976687	0.269111
cg11701312	-0.0188752	0.00251562	0.0181602	0.00221397	0.298768	0.256063
cg04858631	-0.031253	0.00425258	0.0354143	0.00631893	0.377594	0.501073
cg11390978	-0.0193686	-0.0023179	0.0627934	0.0115566	0.757765	0.841067
cg27262054	0.0150908	0.00483552	0.0348622	0.00366934	0.665165	0.187797
cg24688690	0.010914	0.00032346	0.015549	0.00247465	0.482805	0.896025
cg06369322	-0.00357726	-0.00119085	0.0193893	0.00286842	0.853641	0.678094
cg04673446	0.0294081	0.00152319	0.02157	0.00393571	0.172885	0.698806
cg19325791	-0.010932	0.00383925	0.0329465	0.00547985	0.740061	0.483669
cg19744173	0.0015256	0.000301893	0.0233054	0.00326791	0.947813	0.926409
cg07029024	0.0322741	-0.00316401	0.0344538	0.00472465	0.349007	0.503181
cg25317941	0.0258342	-0.00055249	0.0208901	0.00379807	0.216326	0.884365
cg25727671	-0.00621325	0.0167501	0.0534195	0.00891026	0.907416	0.060349
cg26850624	-0.0455687	-0.000335039	0.0597273	0.00421469	0.445618	0.936653
cg13518625	0.0452418	-0.0187661	0.0829318	0.0127042	0.585444	0.139877
cg17566560	-0.0638841	0.00873555	0.0266393	0.00507569	0.0165507	0.0854768
cg16611234	0.0257112	-0.00273943	0.0467382	0.00523818	0.582313	0.601081
cg16151538	0.0140224	-0.00586407	0.0247637	0.00447243	0.571277	0.190035
cg04368724	0.00226807	0.00120811	0.0420504	0.00478132	0.956992	0.800562
cg14264316	-0.0343714	0.00867375	0.0283865	0.00520208	0.226072	0.0956848
cg26151910	-0.100927	0.016798	0.0385398	0.00628709	0.00888145	0.00763858
cg26486070	-0.0430809	0.004514	0.0384956	0.00375179	0.263255	0.229137
cg14254999	-0.0449915	0.00115665	0.0451088	0.00831688	0.318666	0.889415
cg00699986	0.0490563	-0.0125184	0.027586	0.00461597	0.0754819	0.00677781
cg06688763	0.0387554	-0.00140982	0.0745591	0.00584784	0.603283	0.809529
cg15700587	-0.00998826	0.000937725	0.029127	0.00537598	0.731687	0.861556
cg03489965	0.0646556	0.000579991	0.0398379	0.00450438	0.104774	0.897566
cg07413467	0.0261499	0.000927339	0.041604	0.00400213	0.529735	0.816799
cg01731783	-0.0297744	0.00709306	0.0153188	0.00263489	0.0520532	0.00719368
cg06635952	0.0106603	0.00570755	0.0249407	0.00330821	0.669115	0.0847178
cg17087741	-0.0335114	0.00415874	0.0677644	0.0113351	0.62098	0.713762
cg20438687	-0.0377379	0.00322171	0.0326851	0.003763	0.248413	0.392072
cg07986378	0.00438284	0.000443938	0.0421169	0.00731088	0.917128	0.951589
cg22356527	0.0217936	0.00444182	0.0303691	0.00553017	0.473055	0.422007
cg01839993	-0.013772	-0.00489007	0.0298306	0.00285671	0.644377	0.0871778
cg13020466	0.0186893	-0.00902726	0.0266842	0.00452839	0.483752	0.0464149
cg01951879	0.0180205	-0.00183226	0.0424001	0.0058501	0.670874	0.754178
cg24931658	-0.0147521	0.00477209	0.0251744	0.00310589	0.557949	0.124669
cg16398761	-0.0888441	-0.00905168	0.0610216	0.0103082	0.145539	0.380049
cg26196424	-0.0016765	-0.000338428	0.035991	0.00540663	0.962851	0.950099
cg14563949	-0.0125331	0.00103603	0.0193018	0.00306306	0.516195	0.735242
cg09554443	-0.0209382	-0.000228553	0.0301381	0.00293645	0.487315	0.937973
cg07069636	-0.0378217	0.00252028	0.0209298	0.0025358	0.070915	0.320469
cg09560590	-0.0173713	-0.0015178	0.0330155	0.00344727	0.598848	0.6598
cg04907244	-0.0247642	0.00684038	0.0546724	0.00521172	0.650641	0.189587
cg23576855	-0.255594	-0.00338412	0.143874	0.00599251	0.0758723	0.572358
cg16519923	-0.0188982	0.00675878	0.0248254	0.00413346	0.446588	0.10227
cg04806562	0.00939802	-0.00174817	0.018156	0.00271484	0.604772	0.519734
cg12619504	-0.0656934	0.00266298	0.0322552	0.00278384	0.0418502	0.338954
cg09848445	0.0175404	0.00106963	0.0614575	0.0112556	0.775356	0.924305
cg26477856	-0.0162984	0.00416006	0.0176108	0.0028349	0.354815	0.142501
cg24556382	-0.00942285	-0.00484133	0.0455839	0.00520569	0.836257	0.352544
cg23401251	0.018911	-0.000585731	0.0268036	0.0041969	0.480548	0.889027
cg19859270	-0.0922294	-0.00109632	0.0400719	0.00740115	0.0214384	0.882264
cg19459791	0.0383351	0.00248207	0.0367791	0.0045672	0.297403	0.58691
cg11231349	-0.031722	0.00214224	0.0519377	0.00733732	0.54142	0.770361
cg03399898	-0.0599114	-0.00253893	0.0624033	0.00509432	0.337173	0.618299
cg16255816	-0.039577	0.004728	0.0301056	0.00356462	0.188808	0.184957
cg10874644	0.0238717	0.00224924	0.0590854	0.00765048	0.686242	0.768805
cg17668731	0.033724	-0.00440895	0.0187151	0.00334208	0.0716728	0.187327
cg14435720	0.0435842	-0.00276252	0.0791853	0.0121797	0.582095	0.820605
cg09658497	-0.119936	0.00375599	0.09289	0.00789469	0.196839	0.634325
cg06885459	-0.0162932	0.00297016	0.0343902	0.00328269	0.635724	0.365742
cg01207684	-0.0853433	-0.00315543	0.0586204	0.00731565	0.145596	0.666303
cg08606254	-0.0105753	0.00257566	0.0508851	0.00747187	0.835383	0.730364
cg00336149	0.0519283	0.00280265	0.047637	0.00334705	0.275856	0.402551
cg21473814	-0.00625626	-0.0013102	0.0350444	0.00408627	0.858331	0.748539
cg18146737	0.0138175	-0.0235546	0.164931	0.0153914	0.933244	0.126174
cg02583484	-0.0354341	-0.00288744	0.0283524	0.00268795	0.211564	0.282929
cg20357806	0.011835	0.00347641	0.0320968	0.00516365	0.712365	0.500911
cg06972908	-0.0692408	0.00649504	0.0252152	0.00442878	0.00607683	0.142742
cg04701628	0.0628442	-0.00976171	0.0185932	0.00324954	0.000736334	0.00271554
cg26718213	-0.0747654	-0.00046854	0.0808864	0.00500749	0.355472	0.925468
cg16201146	-0.0126169	0.00631296	0.0281618	0.00436169	0.654185	0.14804
cg25748521	-0.0144243	0.000548663	0.0230615	0.00387903	0.531722	0.887542
cg13193840	-0.141781	0.0171698	0.0608286	0.0114691	0.0198407	0.134627
cg20684110	-0.0627689	0.00613008	0.0446462	0.00420297	0.159942	0.14495
cg15806304	0.000208072	0.000631499	0.0250353	0.00329804	0.99337	0.848182
cg26844633	-0.0070862	0.00586196	0.0456701	0.00733904	0.876708	0.424589
cg03348792	0.0130306	0.00363556	0.0290994	0.0042823	0.654345	0.39605
cg08035323	0.0527775	-0.00494966	0.0473042	0.00431695	0.264715	0.251775
cg21188533	0.0941444	0.000357771	0.0828735	0.00642264	0.256136	0.955586
cg23441210	-0.00464683	8.63416e-05	0.0278886	0.00518034	0.867682	0.986705
cg11557553	0.0340807	-0.00593968	0.021929	0.00392264	0.120279	0.13022
cg13428066	-0.013543	-0.0017677	0.0236404	0.00378336	0.566786	0.640416
cg13937905	-0.0317801	-0.0011416	0.0558248	0.00668497	0.569236	0.864432
cg22407942	-0.0399884	0.00540816	0.0473142	0.00408774	0.398148	0.186064
cg20295214	0.00537333	-0.00130787	0.033919	0.00576157	0.874142	0.82046
cg26364091	7.84766e-05	-0.00196713	0.0226877	0.00301107	0.99724	0.513677
cg26963277	0.00325392	-0.00830716	0.0580855	0.00665847	0.955333	0.212402
cg10678215	-0.00697224	0.000526135	0.0384815	0.00592384	0.85624	0.929241
cg08972170	0.0314232	0.00448661	0.0377602	0.0052342	0.405406	0.391509
cg10965178	-0.00156379	-0.0021717	0.0280801	0.00345255	0.955595	0.529452
cg01481251	-0.0811647	-0.00276103	0.0537349	0.00838516	0.131065	0.742
cg25949550	-0.0187353	0.00201191	0.0342056	0.00405102	0.583949	0.619526
cg14580211	-0.0350552	0.00350344	0.0305854	0.00390667	0.25188	0.370001
cg19816811	-0.0751301	0.00531531	0.0439848	0.00325172	0.0878277	0.102375
cg24698211	-0.0331275	-0.00156409	0.0315942	0.00361241	0.294538	0.665105
cg25921609	-0.00799323	-0.00190592	0.0360921	0.00487583	0.824751	0.695942
cg20305005	-0.0466785	0.00437891	0.0321872	0.00445414	0.147152	0.325738
cg10592478	0.00220821	-0.00149367	0.0445849	0.00782783	0.960502	0.8487
cg09975715	0.000504884	0.00162978	0.0346972	0.00589231	0.988391	0.782136
cg21869609	-0.116885	0.00581645	0.0932626	0.00532986	0.210307	0.275347
cg23842572	0.0695277	-0.00688152	0.0276363	0.00427732	0.0119463	0.107893
cg01744331	-0.0810427	0.00356429	0.07133	0.0111962	0.256008	0.750272
cg16391678	-0.0197336	0.00495756	0.0231853	0.00374286	0.394788	0.185565
cg08666707	-0.0327061	0.0072993	0.0201591	0.00318466	0.104857	0.0220669
cg22876908	-0.0352814	0.00151051	0.0196637	0.00294003	0.072921	0.607502
cg23594345	0.0102023	0.00402997	0.0545333	0.00563379	0.851617	0.474539
cg25292882	-0.00859244	0.00902633	0.0429957	0.00768947	0.841619	0.240667
cg14817490	0.0367913	0.00256074	0.0406707	0.00423604	0.3658	0.54561
cg26995224	-0.109613	0.00806629	0.0527577	0.00328805	0.037917	0.0142897
cg19089201	-0.0508994	-0.0052365	0.104445	0.00884198	0.626093	0.553799
cg02917867	0.00327129	0.00333243	0.0245001	0.00325167	0.893794	0.305632
cg10403394	0.103058	-0.000426146	0.0687555	0.00509749	0.134111	0.933388
cg13038618	0.025823	-0.0006938	0.0341278	0.0052142	0.449338	0.894167
cg11225089	-0.00494989	0.00529128	0.0243327	0.00399831	0.83882	0.185942
cg10827488	0.0323298	-0.00524166	0.0254873	0.0038465	0.204768	0.173215
cg03660377	-0.01007	-0.00329163	0.0499353	0.00753493	0.8402	0.662295
cg10255761	-0.0176666	0.000809581	0.0269386	0.00301785	0.512033	0.788539
cg01097768	-0.0341161	0.0134418	0.0251529	0.00473004	0.175108	0.00455589
cg11666770	-0.124244	-0.00870479	0.110755	0.00653173	0.262143	0.182866
cg17333042	-0.0219871	0.00172071	0.0216432	0.00255015	0.309816	0.499954
cg09469355	-0.0281279	-0.00166127	0.0236538	0.00283217	0.234536	0.557592
cg18900812	-0.0147882	-0.0171108	0.0490061	0.008469	0.76286	0.0435529
cg18295744	0.0132855	0.00258957	0.0211972	0.0036354	0.530877	0.476395
cg02228160	0.00864552	-0.0022437	0.0312828	0.00336835	0.7823	0.505463
cg26788216	-0.0314854	-0.00143861	0.032882	0.00442344	0.338418	0.745063
cg11207515	0.0549376	0.0111453	0.0498738	0.0060001	0.27081	0.0634645
cg20066188	0.00444001	0.00592933	0.0476129	0.00319125	0.925716	0.063396
cg01294327	-0.0828765	0.00633114	0.0677857	0.00420666	0.221673	0.132561
cg10750182	-0.0117943	0.00103403	0.0159149	0.00251882	0.458718	0.681492
cg11145461	-0.0236889	-0.00772059	0.0389414	0.00654309	0.543032	0.238232
cg16880946	-0.0547613	0.000821731	0.0375514	0.00265695	0.14497	0.757161
cg00871371	-0.0234378	0.00791798	0.0232556	0.00324758	0.313653	0.0148986
cg08899667	-0.000347685	-0.000568807	0.0265529	0.00290731	0.989554	0.844919
cg11197630	-0.0333747	-0.00444318	0.0491037	0.00905905	0.49677	0.623885
cg26878655	0.00290143	0.00145453	0.0288765	0.00535651	0.919973	0.786016
cg08386009	-0.0202858	0.00329374	0.0169368	0.00280352	0.231143	0.240272
cg09022230	-0.00579227	0.00364352	0.0323098	0.00367346	0.857744	0.321459
cg22937882	-0.00922059	0.00273812	0.0268666	0.00458895	0.731479	0.550827
cg03611151	0.0572434	0.00449112	0.0306318	0.00442739	0.0617958	0.310584
cg15636519	-0.00828458	0.001726	0.0442255	0.00758316	0.851421	0.819986
cg13582060	0.0385331	-0.00344523	0.0604273	0.0082939	0.523756	0.677924
cg08947774	0.0132684	0.00187034	0.0287272	0.00432106	0.644217	0.6652
cg00324097	-0.00585789	0.00181183	0.0174011	0.00259024	0.736422	0.484377
cg00911794	0.00288045	0.00249134	0.0460277	0.00640471	0.950107	0.697352
cg12806681	0.00634484	-0.000722291	0.0458635	0.00646082	0.889984	0.911003
cg20873136	-3.96424e-05	-0.000282095	0.0248969	0.00418021	0.99873	0.946207
cg14165660	0.0427091	-0.00479095	0.0286531	0.00420435	0.136226	0.254695
cg05517711	-0.030817	0.00497214	0.0174075	0.00257941	0.076815	0.0541204
cg10179300	0.0145731	0.0018938	0.0411717	0.00557245	0.723407	0.734024
cg06294803	-0.0852171	0.00294397	0.0462408	0.00628075	0.0654906	0.639342
cg06151964	0.0168678	-0.00117965	0.01901	0.00298668	0.375006	0.69293
cg06394460	0.0431792	-0.0056865	0.0518862	0.00773179	0.405395	0.462186
cg06513247	0.0137098	0.0014159	0.016052	0.00254951	0.393148	0.578744
cg19406367	-0.0323923	0.00761054	0.0420836	0.00448299	0.441576	0.0898157
cg03415545	-0.0215284	-0.00841328	0.054173	0.00850469	0.69111	0.322723
cg02101876	-0.00491533	0.0139882	0.049449	0.00897722	0.920827	0.119431
cg02556393	0.0219272	-0.00475401	0.0384882	0.00482514	0.568941	0.324684
cg25421530	0.0117445	0.000972198	0.0427091	0.00660655	0.78335	0.883031
cg01435643	0.0221526	0.000325964	0.0546649	0.00498563	0.685352	0.947881
cg17814814	-0.024855	0.00590975	0.0215077	0.00330238	0.247957	0.0737632
cg02013841	0.00424645	0.000193052	0.0525813	0.00986243	0.935639	0.984386
cg06949439	-0.0718807	0.00186027	0.0317159	0.00324702	0.0235536	0.56681
cg10520740	0.0091164	0.0051385	0.0177668	0.00280711	0.607921	0.0674038
cg15482893	0.00670894	0.00201294	0.0350076	0.00523221	0.84804	0.700507
cg02782510	-0.0505717	0.00824303	0.0309387	0.00512005	0.102271	0.10765
cg14093127	-0.0703273	0.00370209	0.0473471	0.00591101	0.137617	0.531226
cg26790897	0.0079184	0.00227212	0.0295256	0.00440249	0.78858	0.605874
cg01856529	-0.0714914	-0.00372037	0.0331426	0.00558829	0.0310984	0.505693
cg05529343	0.0600436	8.30497e-05	0.0803774	0.00852459	0.455154	0.992228
cg02186444	0.0402872	0.000847099	0.0249275	0.00271373	0.106239	0.754975
cg14142087	0.0220897	0.00452153	0.0228829	0.00271444	0.334504	0.0960086
cg12547807	-0.0394525	0.00219584	0.0213806	0.00266847	0.0651566	0.410725
cg10825315	0.0144716	0.00502023	0.0309329	0.00517202	0.639942	0.331904
cg19589396	-0.038904	0.00238284	0.0341881	0.00426268	0.255293	0.57626
cg08118908	-0.0389675	-0.00296584	0.0435201	0.00704918	0.370672	0.674018
cg00073090	0.0120594	-0.0036254	0.0227552	0.00297402	0.596197	0.223058
cg01513913	0.0119489	-0.000901131	0.030107	0.00263435	0.69151	0.732355
cg23973524	-0.0212248	0.00463166	0.0362497	0.00317902	0.558285	0.145374
cg13976502	-0.0178353	0.00508246	0.0197584	0.00303787	0.366799	0.0945632
cg13525276	0.0247674	0.0061115	0.0407736	0.00566012	0.54363	0.280454
cg13039251	0.0534799	0.00853863	0.0501379	0.00536996	0.286277	0.11206
cg08149865	0.035407	0.00238634	0.0261578	0.00295872	0.176041	0.420077
cg25953130	-0.0151821	0.00350881	0.0493816	0.00626987	0.758539	0.575829
cg00501876	0.0137827	-0.00103159	0.0208713	0.00338058	0.509086	0.7603
cg05969150	0.0160306	-0.00178187	0.0187492	0.00225367	0.392663	0.429296
cg00976097	-0.144812	-0.0270558	0.166554	0.0107155	0.384739	0.0116915
cg23565821	-0.0123791	0.00181752	0.0270797	0.00378475	0.647622	0.631151
cg21161138	-0.0327893	0.00081328	0.0292745	0.00399841	0.26282	0.838854
cg17619755	0.044014	-0.00541482	0.045614	0.00408021	0.33473	0.184712
cg11152412	-0.00635338	-0.0039878	0.0321767	0.00550039	0.84349	0.46858
cg16936060	0.00311019	0.00278428	0.0292496	0.0037072	0.915329	0.45276
cg14712058	-0.0281227	-0.00245911	0.033525	0.00442498	0.401651	0.578488
cg24693803	-0.0225756	0.0022327	0.0297853	0.00289626	0.448592	0.440911
cg12406027	-0.0308701	-0.000708192	0.02366	0.00252639	0.192157	0.779278
cg17038235	-0.0315532	0.00176771	0.0264474	0.00312527	0.233004	0.571752
cg16503724	-0.0059915	0.00263331	0.0231553	0.00338982	0.795851	0.437401
cg26060489	-0.0198656	-0.00459072	0.0209149	0.00367768	0.342292	0.212163
cg09607043	-0.00449622	0.00244128	0.038312	0.0060282	0.906587	0.685562
cg12873476	-0.0301717	-0.00023482	0.0385366	0.00318497	0.433786	0.941239
cg00085013	-0.0104224	0.00422147	0.0236863	0.00355636	0.659969	0.235437
cg26529655	0.0135529	0.00339393	0.0224368	0.00382571	0.545868	0.375171
cg19211853	-0.0960592	0.0101462	0.119306	0.0166194	0.420826	0.541634
cg02451831	-0.00720779	-0.00306073	0.0277608	0.00417864	0.795167	0.464016
cg06235438	-0.0432678	0.00297206	0.0270098	0.00485095	0.109298	0.5402
cg02775417	-0.0414575	-0.0031742	0.0684441	0.0124242	0.54476	0.798387
cg20059928	-0.0613691	0.000719291	0.0444459	0.00326406	0.167561	0.82562
cg10951873	-0.0437491	0.00756896	0.0333916	0.00529331	0.190265	0.152981
cg25809905	0.124206	0.00436421	0.0434032	0.00358456	0.00427133	0.223639
cg16969872	-0.0101702	-0.00229026	0.0376958	0.00434059	0.787347	0.597841
cg19046189	0.0129749	-0.000231352	0.0172272	0.00264005	0.451429	0.930183
cg23667432	0.00520364	0.00499044	0.0201301	0.00357461	0.796043	0.162935
cg01005506	-0.0587378	0.00292023	0.0325037	0.00279674	0.0709374	0.296608
cg14074174	-0.0315223	0.00297518	0.0214212	0.00227582	0.141325	0.191343
cg04956244	0.0149527	0.00202173	0.0161406	0.00258903	0.354334	0.435015
cg03345925	0.0119401	-0.00216012	0.0271154	0.00355989	0.659738	0.544093
cg27537125	-0.0182053	0.00425123	0.0234073	0.00350044	0.436794	0.224786
cg20902353	-0.0166617	0.00351962	0.0179774	0.00266844	0.354126	0.187411
cg13784312	-0.0682127	0.0285157	0.133921	0.0245334	0.610551	0.245316
cg11902777	0.0350657	-0.00293914	0.0615212	0.00627989	0.568768	0.639845
cg21747070	0.0034613	0.00174912	0.0347724	0.00308798	0.920721	0.571202
cg17024919	-0.0553284	0.0166146	0.0711136	0.00522394	0.436676	0.00150509
cg21566642	-0.264739	0.00916474	0.0522674	0.00484579	4.55824e-07	0.0588131
cg08763102	0.0019576	0.00343754	0.0216635	0.00357886	0.928006	0.336977
cg18754985	-0.00845015	-0.0105138	0.0472045	0.00931469	0.857943	0.259216
cg22132788	-0.0255565	-0.00289894	0.123256	0.00946489	0.835769	0.759441
cg03646329	-0.0845092	0.00970621	0.0608877	0.00929504	0.165294	0.296571
cg14120703	0.0259876	-0.0055361	0.0164108	0.00275114	0.113426	0.0443948
cg02336104	0.001126	0.00075615	0.033568	0.00311157	0.973245	0.808035
cg04813697	-0.0246499	0.000750518	0.0376755	0.00448314	0.513021	0.867074
cg03519879	-0.0147348	0.00302216	0.0181627	0.00263839	0.417306	0.252236
cg27449150	-0.0156119	0.0054505	0.0308898	0.00477738	0.613324	0.254124
cg04573702	-0.014529	0.000747864	0.0227811	0.00323278	0.523696	0.817089
cg07465627	0.0106408	0.00186059	0.02407	0.00390021	0.658474	0.633408
cg04970434	0.0188821	-0.00227049	0.0279454	0.00363739	0.499326	0.532602
cg04383058	-0.0181822	0.00317395	0.0296286	0.00455344	0.539494	0.485902
cg16702313	-0.0209335	-0.00014767	0.0191363	0.00350117	0.274098	0.966364
cg23198793	-0.015215	0.00173621	0.0317089	0.00434662	0.631399	0.689635
cg09578155	-0.0158347	0.00273142	0.015436	0.00229456	0.305085	0.23411
cg10788371	-0.0345175	0.00174135	0.0304866	0.00268315	0.257716	0.516458
cg20103692	0.0211864	-0.00344764	0.0370421	0.00654461	0.567406	0.59843
cg24741609	-0.0161724	0.0035402	0.0294325	0.00308129	0.582752	0.250799
cg22539182	0.0347422	0.00157495	0.0247679	0.00239064	0.160894	0.510143
cg12836863	0.00532763	-0.00375511	0.024733	0.00444208	0.829469	0.398072
cg14977938	0.0240371	0.00198697	0.0314877	0.0034785	0.44534	0.567954
cg06433467	0.10637	-0.0011631	0.0645648	0.00767232	0.0996281	0.879528
cg18991417	0.0205669	0.000374878	0.0287974	0.00385053	0.475193	0.922458
cg05957567	-0.00198238	0.00254402	0.0220913	0.00301892	0.928506	0.39956
cg02035751	-0.0291462	0.00675593	0.0201191	0.003031	0.147571	0.0259908
cg19847577	-0.027554	0.00502488	0.0340741	0.00328484	0.418833	0.126331
cg01442064	-0.0393831	-0.00160073	0.0235118	0.0035132	0.094072	0.648731
cg15087369	-0.0309385	0.00568918	0.0328624	0.00509135	0.346572	0.264023
cg16983588	0.0176955	-0.00336542	0.0427226	0.00422126	0.678785	0.425448
cg14179389	-0.0697936	0.00412785	0.0604822	0.00607079	0.248687	0.496658
cg04258133	0.0802222	-0.00762303	0.0395924	0.0047701	0.042888	0.110267
cg09099830	-0.00385869	0.00200601	0.0299096	0.00290569	0.897364	0.490085
cg24719910	0.0118956	-0.000596473	0.0456238	0.00875003	0.79432	0.945662
cg04018738	0.00169118	0.0112168	0.0722557	0.00620626	0.98133	0.0709459
cg19825437	-0.0056371	0.00390155	0.0304098	0.00364519	0.852958	0.284671
cg09570614	-0.000904781	0.00300633	0.0236313	0.00262016	0.969463	0.251435
cg24158160	0.0305095	-0.00528889	0.02685	0.00475378	0.255944	0.266101
cg21913886	-0.0563383	-0.00438155	0.0422911	0.00491733	0.182978	0.373071
cg00835193	-0.0489722	0.00577558	0.0477425	0.00548305	0.305145	0.292377
cg23673974	0.00728858	0.00119653	0.0222815	0.00395417	0.743609	0.762244
cg01668352	0.0252201	-0.00281098	0.0327305	0.00650654	0.441051	0.665796
cg11253886	0.0254268	0.0016674	0.03491	0.00315136	0.466506	0.596822
cg18316974	0.101103	-0.0211918	0.12118	0.0138839	0.404209	0.127168
cg18625627	-0.00706138	0.00655763	0.0424337	0.00596119	0.867851	0.271513
cg07063068	-0.0199541	-0.0128737	0.0609413	0.00991158	0.743371	0.194223
cg26271591	0.0115739	-0.010229	0.0458122	0.00717421	0.800572	0.154169
cg10814005	-0.0652608	0.00678426	0.0390018	0.00541433	0.094426	0.210426
cg24049493	-0.00723413	0.00611881	0.0766578	0.00584541	0.924828	0.295398
cg03316752	0.0183587	-0.0123024	0.046318	0.00788788	0.691874	0.119086
cg05302489	0.0270475	0.000325786	0.0456801	0.00520477	0.553855	0.9501
cg12729894	-0.0124659	-0.000489629	0.0236424	0.0033985	0.598062	0.885466
cg03957124	-0.0198265	0.00485738	0.0213032	0.00357503	0.352113	0.174479
cg11824827	0.0313553	-0.0031012	0.0271631	0.00333739	0.248512	0.352945
cg14089503	0.0118271	0.00369862	0.0375288	0.00459297	0.752686	0.42081
cg19925780	0.00036995	-0.0069789	0.042487	0.00612062	0.993053	0.2544
cg01017464	-0.0319363	0.00963365	0.0407636	0.004932	0.433462	0.0509995
cg22845855	-0.0375452	-0.000891469	0.0427819	0.00618361	0.380263	0.885391
cg22870429	-0.0234638	0.00614709	0.0261139	0.0037683	0.369014	0.103078
cg03109660	-0.0204739	0.00659769	0.0245114	0.00406795	0.403644	0.105074
cg17924476	0.0882908	-0.000298782	0.0428507	0.00386885	0.0395199	0.938455
cg22891595	-0.00168791	0.00477038	0.0239205	0.00310595	0.943753	0.124811
cg01940273	-0.140486	-0.000758242	0.0348987	0.00363437	5.93593e-05	0.83477
cg04716530	-0.0436643	0.00717562	0.0293296	0.00475318	0.136692	0.131384
cg11554391	-0.0329298	-0.00316201	0.0384073	0.00510754	0.391337	0.535968
cg23233742	-0.0164242	0.00117147	0.0300322	0.00320065	0.584527	0.714417
cg25648203	0.0290936	-0.00384177	0.033035	0.00445924	0.378593	0.389106
cg14675361	-0.0012945	-0.000205199	0.0464391	0.00646778	0.977764	0.974695
cg23219570	-0.0120282	-0.00325402	0.0302861	0.00363731	0.691301	0.371155
cg22998476	-0.0276738	0.00132589	0.0270541	0.00331634	0.306488	0.689369
cg27405731	-0.0105703	-0.00530733	0.0327439	0.00416329	0.74687	0.202616
cg11690578	-0.0607984	0.0014237	0.0353175	0.00497434	0.085313	0.774764
cg20244340	-0.0429822	0.00364917	0.0406109	0.00314598	0.290046	0.246284

## Sheet: all results TSQL5
CpG site	cross-sectional coefficient TSQL 5	longitudinal coefficient TSQL 5	cross-sectional coefficient SE TSQL 5	longitudinal coefficient SE TSQL 5	cross-sectional coefficient pvalue TSQL 5	longitudinal coefficient pvalue TSQL 5
cg05575921	-0.133173	-0.00101909	0.0856444	0.00994737	0.120134	0.918417
cg23079012	-0.0628072	0.0138832	0.0678371	0.00924896	0.354634	0.13359
cg06126421	-0.111842	0.00186679	0.046733	0.00422798	0.0168169	0.658902
cg25512107	-0.0707299	0.0154024	0.0478404	0.00911025	0.139409	0.0911383
cg07251887	-0.00956611	0.00221288	0.0225197	0.0030038	0.671037	0.461443
cg14753356	-0.0468479	0.00128954	0.0246166	0.00334343	0.0571708	0.699786
cg25189904	-0.0653442	-0.000554604	0.0530105	0.00462114	0.217885	0.90449
cg15022400	-0.00464365	0.000298759	0.0282779	0.00354677	0.86958	0.932883
cg15187398	0.0230578	-0.00166992	0.0363688	0.00316599	0.526173	0.59797
cg05875421	0.0115804	0.000680878	0.0310783	0.00526278	0.709465	0.89708
cg13184736	-0.0346608	0.00118031	0.0723299	0.00631437	0.631861	0.85175
cg23161492	-0.0325866	0.00123137	0.0417707	0.00344067	0.435434	0.720487
cg09338136	0.00631329	-0.00439488	0.0300425	0.00364866	0.833578	0.228611
cg12147622	0.00888695	-0.000463387	0.0293469	0.00411203	0.762055	0.910294
cg24540678	0.00789513	0.00149782	0.0266638	0.003504	0.767186	0.669115
cg07306253	0.0256863	-0.00289505	0.020598	0.00359889	0.212508	0.4213
cg15474579	-0.0426087	0.00244538	0.0261384	0.00330692	0.103242	0.459754
cg13399816	-0.0482729	0.00144466	0.0370479	0.00317589	0.192773	0.649271
cg07202214	-0.00182335	-0.00531991	0.0289112	0.0034129	0.94972	0.119299
cg10380221	0.00585176	-0.00310019	0.0322256	0.00355485	0.855928	0.383318
cg25469474	-0.0558155	0.016487	0.0679545	0.0112746	0.41152	0.143898
cg23916896	0.0244544	0.000888461	0.0606862	0.00779912	0.687018	0.90932
cg04225775	-0.0460549	-0.00275126	0.0310635	0.00364238	0.138354	0.450178
cg04180046	0.0188401	-0.000940773	0.0387048	0.00297015	0.626497	0.751491
cg01836137	0.039543	-0.00476589	0.0270166	0.00299627	0.143466	0.111945
cg18446336	-0.0948272	0.00268386	0.0480124	0.00379006	0.048443	0.478992
cg05194346	-0.0479419	0.00703369	0.0379012	0.00364458	0.206082	0.0538394
cg02257517	-0.00205872	0.00427841	0.0208347	0.00261243	0.921298	0.101727
cg19827923	-0.0355267	0.0086492	0.0188021	0.00320152	0.0589431	0.00699002
cg26856289	0.010584	0.000410149	0.0265892	0.00388374	0.690629	0.915911
cg19717773	-0.158997	0.00360828	0.0709132	0.00506123	0.0251002	0.476025
cg01439566	0.032224	-0.00567941	0.0207415	0.00376735	0.120406	0.131917
cg13578465	0.0641599	0.0026963	0.0546104	0.00425799	0.240234	0.526694
cg26077378	0.053239	-0.00694768	0.0594652	0.00630643	0.370754	0.270804
cg03234777	-0.0411249	0.00350456	0.0383791	0.00489658	0.28406	0.474296
cg03440944	-0.0230301	0.000178602	0.0283407	0.00506898	0.416516	0.971898
cg03274391	0.0689232	0.00819197	0.0887965	0.00621046	0.43776	0.187382
cg09717146	0.00164242	0.00163698	0.026411	0.00455857	0.950419	0.719579
cg08709672	-0.0142191	0.000676901	0.0257704	0.0027774	0.581184	0.807488
cg19713851	0.0189414	-0.00926736	0.0717607	0.00586094	0.791852	0.114076
cg11621113	0.0326904	0.000867554	0.0252945	0.00314777	0.196381	0.782893
cg24859433	-0.033508	0.00102599	0.0325814	0.00478172	0.30386	0.83014
cg25560398	0.00541393	-0.00908256	0.0224652	0.00403623	0.809581	0.0245985
cg04885881	0.0148943	0.000370913	0.0344117	0.0035908	0.665196	0.917745
cg14624207	-0.00908492	-0.00169034	0.0196354	0.00289553	0.64364	0.559473
cg03547355	-0.0445413	0.0034726	0.0218513	0.00324649	0.0416324	0.284976
cg16815882	-0.00257087	0.00271126	0.0199458	0.00325335	0.897453	0.404789
cg03707168	-0.00143766	-0.00466763	0.0306126	0.00406336	0.962547	0.250887
cg21121843	0.0327581	-0.000568505	0.041451	0.00512327	0.429461	0.911661
cg22117188	-0.00152775	-6.18774e-05	0.01542	0.00268622	0.921086	0.981626
cg02532700	-0.0213145	-0.00474045	0.0422951	0.00417177	0.614367	0.256038
cg26242531	-0.0178549	0.000142867	0.022191	0.00289638	0.421147	0.960667
cg19888787	-0.0288173	-0.0198065	0.0640497	0.0119719	0.652805	0.0982805
cg24173182	-0.033543	-0.00366048	0.0290208	0.00380962	0.247898	0.336813
cg20810975	-0.00455842	0.00137695	0.0170373	0.00295948	0.789064	0.641819
cg18503679	-0.0333105	0.0115523	0.231717	0.0320898	0.885708	0.718906
cg16556677	-0.0407568	-0.00385635	0.0273825	0.00399675	0.136788	0.334792
cg16145216	0.0229879	0.00174046	0.0418051	0.00329275	0.582481	0.597192
cg21949830	-0.0341234	0.00414523	0.0432826	0.00650055	0.430557	0.523799
cg11229399	0.0726847	-0.0087006	0.038761	0.00444212	0.060928	0.0503664
cg26701785	0.172392	0.00357513	0.0795972	0.00673881	0.0304777	0.595838
cg10841124	0.0722572	-0.00107583	0.0406116	0.00590905	0.0753466	0.855561
cg19798735	-0.040882	0.00379019	0.0429757	0.00822425	0.341551	0.644979
cg18404811	-0.0322195	0.00449968	0.0244935	0.0038445	0.188499	0.242048
cg00871610	-0.0255739	-5.01486e-05	0.0288165	0.00371551	0.374935	0.989233
cg01899089	-0.0090378	-0.00233393	0.0251279	0.00329069	0.719131	0.478294
cg19572487	-0.0511795	0.00460307	0.0321973	0.00464043	0.112084	0.321409
cg09716613	0.0348487	0.00136728	0.0315439	0.00397604	0.269399	0.730992
cg18758622	-0.000170236	0.00287806	0.0183243	0.00273897	0.992588	0.293559
cg11730703	0.0461027	-0.00414986	0.0481742	0.00454799	0.33871	0.361696
cg08375941	-0.000928015	0.0011556	0.051545	0.0103078	0.985637	0.910746
cg13418576	0.032402	1.98911e-05	0.0321727	0.00503393	0.313983	0.996848
cg05284742	-0.0383775	0.00239153	0.019691	0.00317345	0.0514194	0.451223
cg03329539	-0.0224566	-0.00465204	0.0281277	0.00387417	0.424745	0.230056
cg13185177	0.000328303	0.00449507	0.0354238	0.00447778	0.992606	0.315634
cg09197783	-0.0390225	-0.000626149	0.0248918	0.00383372	0.117097	0.870286
cg27310319	0.00501044	-0.0138544	0.0324663	0.00553868	0.877365	0.0124943
cg10420527	-0.00128261	0.0027208	0.0168581	0.00214349	0.939362	0.20455
cg07180646	-0.0340445	-0.00120311	0.0343547	0.00278564	0.321856	0.665888
cg09662411	-0.056911	0.00269372	0.0425352	0.00495867	0.181073	0.587061
cg04551776	-0.0074741	0.00404183	0.0270255	0.00420907	0.782146	0.337098
cg10251229	-0.00748702	0.00201025	0.02263	0.00336724	0.740793	0.550612
cg18092474	-0.0660321	-0.00704079	0.0570609	0.00478346	0.24736	0.141289
cg13247990	0.0141389	-0.000124262	0.0185838	0.00311551	0.446841	0.968191
cg01832549	-0.0225224	0.00347319	0.0292897	0.0026188	0.442037	0.184989
cg08884752	-0.0165888	0.000707604	0.0252572	0.00358232	0.511385	0.843447
cg19713429	-0.00279341	-0.00437438	0.0325103	0.00352561	0.931537	0.214927
cg27241845	0.0403353	-0.00343389	0.0307344	0.00375247	0.189553	0.360309
cg02385153	0.00888452	0.00501271	0.034487	0.00622348	0.796722	0.420705
cg11660018	-0.0673616	-1.79225e-05	0.0264247	0.00250898	0.0108891	0.994302
cg21486510	-0.01535	-0.00277563	0.0200932	0.00318628	0.444984	0.383854
cg16047567	-0.05071	-0.00231949	0.0337802	0.00325944	0.133504	0.476828
cg00310412	-0.00301155	-0.000336055	0.0235842	0.00221304	0.898408	0.879327
cg05508862	0.00791919	0.000830175	0.0201289	0.00221758	0.694055	0.708197
cg17372101	-0.0293792	0.00226256	0.0314185	0.0036995	0.349865	0.540921
cg19956914	0.0570014	0.00183286	0.0429992	0.00299309	0.185165	0.540404
cg06644428	-0.319486	0.0100633	0.0753737	0.0103886	2.34892e-05	0.332882
cg01882991	-0.0298529	-0.00504117	0.0279323	0.00326529	0.285321	0.122865
cg15693572	0.0321724	0.0115861	0.0735413	0.00517405	0.661831	0.025306
cg21322436	-0.0372133	-0.00574714	0.033155	0.00525171	0.261809	0.274009
cg17287155	-0.073442	4.82111e-05	0.043021	0.00658791	0.0879387	0.994162
cg05460226	-0.0144088	0.00209021	0.0297805	0.00442866	0.628553	0.637026
cg05183538	0.0269066	-0.003192	0.0429352	0.0064185	0.530935	0.619053
cg06459104	-0.0105013	0.00185866	0.0626094	0.0045383	0.866821	0.682204
cg23771366	-0.0812704	-0.00184289	0.0296453	0.00275692	0.00618621	0.503963
cg01429256	0.00415046	-0.00105562	0.0125971	0.00215634	0.741824	0.62454
cg24389054	-0.061882	0.00367111	0.0391954	0.00507031	0.114544	0.46917
cg23067299	0.0650529	-0.0125399	0.0638737	0.00945274	0.308574	0.184876
cg11902728	-0.0143275	0.00138576	0.0220594	0.00328251	0.516088	0.672974
cg25212025	-0.0192374	-0.000712574	0.0356317	0.00323843	0.589345	0.825877
cg01873977	0.00957317	0.000204501	0.0414186	0.00536963	0.817236	0.969626
cg04517079	-0.022891	-0.00076581	0.0228437	0.00242826	0.316452	0.752529
cg18335991	-0.0199152	0.00222158	0.0226853	0.00351408	0.380098	0.527372
cg01756424	0.010497	-0.00129423	0.0139309	0.00209852	0.451227	0.537519
cg08472795	-0.0176548	0.00780739	0.0230199	0.00334755	0.443204	0.0198384
cg05824218	-0.0118343	0.00423937	0.01578	0.00255275	0.453359	0.0970179
cg25730428	0.00327218	0.000140537	0.0266634	0.00310792	0.902341	0.96394
cg07826859	0.00425518	-0.000464557	0.0187636	0.00307867	0.820616	0.880082
cg00689360	-0.0189902	-0.00393119	0.0460009	0.00622887	0.679781	0.52807
cg15212295	-0.0150379	0.0019971	0.027913	0.00478759	0.590115	0.676644
cg07339236	-0.0747108	-0.00269149	0.0501513	0.00879734	0.136429	0.759696
cg19254163	-0.0244621	0.00320237	0.0222994	0.00287623	0.272785	0.265747
cg19918734	0.00167668	-0.00299501	0.0237136	0.00400491	0.943638	0.454698
cg12076915	0.0266373	-0.0024031	0.0362119	0.00303791	0.462088	0.429068
cg06595162	0.000930741	-0.00279816	0.0244288	0.00318361	0.969612	0.379603
cg15408734	-0.0496077	0.00255677	0.0276318	0.00407453	0.0727446	0.530442
cg04044720	-0.00758128	-0.00907405	0.0287075	0.00458933	0.791737	0.0482358
cg26707709	-0.0690675	0.00527227	0.0847029	0.00663539	0.414966	0.42701
cg15342087	-0.0519757	0.00177512	0.0325943	0.00465612	0.110947	0.703084
cg02980249	-0.0104905	-0.000631196	0.0235411	0.00260107	0.655923	0.808302
cg24681208	0.0178299	-0.000654755	0.0193453	0.00305176	0.356799	0.830152
cg03991871	-0.107483	0.00101823	0.053011	0.00501565	0.0427693	0.839159
cg18642234	-0.00863067	-0.00123106	0.019049	0.0025296	0.650542	0.626579
cg13500388	-0.0340938	0.00743579	0.0247555	0.0038652	0.168583	0.0546023
cg19593285	0.0589608	-0.0034746	0.0353302	0.00544064	0.0952888	0.523174
cg04359840	-0.0573693	0.00563954	0.0294676	0.00342438	0.0517062	0.0998242
cg00563932	-0.00624677	-0.00223693	0.0204789	0.00262136	0.760374	0.393631
cg03999941	0.0421767	-0.002687	0.0391361	0.00564173	0.281295	0.633964
cg03604011	0.0841593	-0.0126746	0.0867675	0.0124024	0.332188	0.306995
cg12075928	-0.0262987	-0.00715526	0.037683	0.00631859	0.485314	0.25767
cg10012530	-0.037047	0.00945815	0.02464	0.00392463	0.132842	0.0160934
cg14906103	0.0280433	-0.0027075	0.0252805	0.00402929	0.267423	0.501733
cg13832201	0.00101183	0.000396762	0.026813	0.00312644	0.969902	0.899035
cg00541303	0.0113448	-0.000998886	0.030035	0.00405917	0.705679	0.805658
cg13127741	-0.0301029	-3.40917e-05	0.025809	0.00310922	0.243616	0.991253
cg23110422	0.0137144	-0.0107929	0.0429945	0.00652863	0.749773	0.0985391
cg14012925	-0.0288976	0.00575339	0.0300805	0.0035785	0.336843	0.108131
cg17971600	0.00953458	-0.0014187	0.012419	0.0021217	0.442716	0.50383
cg21140898	0.0549034	-0.0111175	0.0627802	0.00809688	0.381936	0.169974
cg20303561	-0.0306936	-0.00235787	0.0322443	0.0038988	0.341268	0.545439
cg21393163	-0.0274707	-0.00420502	0.0478301	0.0051742	0.565812	0.416547
cg01208318	-0.0472524	0.00110041	0.0512843	0.00441087	0.356993	0.803032
cg05673882	-0.00241845	-0.00139815	0.0399429	0.00419949	0.951727	0.739238
cg19372602	-0.0201006	-0.00406882	0.0325178	0.0052646	0.536543	0.439744
cg16276850	-0.0109097	-0.000989816	0.0188659	0.00326779	0.563131	0.762015
cg26764244	-0.0356174	-0.00116286	0.0530738	0.00515374	0.502257	0.821522
cg12758082	-0.00954411	-0.0015738	0.0164627	0.00249186	0.562149	0.527774
cg15892280	-0.0226786	0.00153178	0.0153066	0.00233855	0.138586	0.512576
cg23090529	-0.00687768	-0.016593	0.0514857	0.00676535	0.893745	0.0143146
cg04039397	0.0118024	-0.0169972	0.055305	0.00763677	0.831032	0.0262085
cg00116430	-0.0308778	-0.00658181	0.0368034	0.00343244	0.401597	0.0553925
cg09109520	0.0263212	0.00068606	0.0397266	0.00355287	0.50771	0.846911
cg26337070	-0.124812	-0.0010682	0.0555771	0.00490051	0.0248601	0.827481
cg10807309	0.013359	0.00360143	0.0323308	0.00318015	0.679516	0.257647
cg12803068	0.0711812	0.00157166	0.0827172	0.00520734	0.389637	0.76284
cg12423733	0.113083	-0.0139262	0.0599444	0.00837915	0.0593735	0.0967547
cg23351584	-0.0019389	-0.000814676	0.0292782	0.00504779	0.947205	0.871809
cg27598208	-0.0118408	-0.00251727	0.0286744	0.00404728	0.679695	0.534074
cg16834726	-0.00359467	0.00373494	0.0214921	0.00379241	0.867183	0.324889
cg25212453	0.0581618	-0.00279598	0.0524821	0.0075219	0.267892	0.710169
cg22403782	-0.0395784	0.00936064	0.0519249	0.0040777	0.446045	0.0218593
cg04521626	-0.00648569	-0.00131259	0.0179824	0.00267832	0.718382	0.624165
cg00808648	-0.00788115	0.00132968	0.019567	0.00366135	0.687146	0.71654
cg15159987	-0.0073764	0.00237967	0.0200002	0.00287102	0.712302	0.407339
cg26282236	-0.0184006	-0.00190018	0.0356036	0.00297494	0.605356	0.523111
cg02743070	-0.00281722	0.00399855	0.0188446	0.0031566	0.881174	0.205479
cg23480021	0.102736	0.0114788	0.101238	0.00961789	0.310355	0.2329
cg19427338	-0.00588182	0.00776265	0.031937	0.00408994	0.8539	0.0579212
cg15600935	0.00980476	0.00623217	0.0392777	0.00703921	0.802897	0.37613
cg04039799	0.00243394	0.00069233	0.0211071	0.00306256	0.908207	0.821188
cg11263997	-0.0124192	-0.00456886	0.0422444	0.00582035	0.7688	0.432607
cg02985540	-0.032655	0.000958759	0.0258979	0.00287073	0.207507	0.73845
cg07123182	-0.017591	-0.00737238	0.0667768	0.0105113	0.792244	0.483193
cg23781467	0.000836442	0.00444676	0.0238508	0.00277067	0.972028	0.108755
cg00687135	-0.00188238	0.00165402	0.0455472	0.0061615	0.967038	0.7884
cg03188382	-0.0027623	0.00175112	0.0268599	0.00292077	0.918101	0.548922
cg07626482	-0.014939	-0.00336982	0.0232589	0.00247984	0.520771	0.174424
cg08396193	-0.0386985	0.00500487	0.0371943	0.00565835	0.29825	0.376584
cg01901332	-0.0179085	-0.0021677	0.0312543	0.0036447	0.566721	0.552114
cg07967717	0.0150404	-0.00196333	0.0243618	0.00310424	0.53706	0.527195
cg01062937	-0.0055641	0.00280768	0.0164817	0.00227405	0.735706	0.21718
cg02657160	-0.030903	0.00213755	0.0330788	0.00583009	0.35028	0.713947
cg12101586	-0.0693436	-0.00418279	0.0624999	0.00573508	0.26738	0.465929
cg06648759	0.00878997	0.000734775	0.0255125	0.00326834	0.730481	0.822158
cg27286011	0.0115882	0.000441572	0.0304469	0.00329761	0.703543	0.893497
cg17551891	-0.0628116	0.00516174	0.0522264	0.00496378	0.229276	0.298594
cg02547394	-0.0672619	0.00207839	0.0400274	0.0067826	0.093011	0.759328
cg05951221	-0.162033	-0.000934331	0.0389392	0.00361597	3.33431e-05	0.796147
cg04704634	-0.0106475	-0.00190645	0.0253364	0.00377426	0.674349	0.613561
cg03450842	-0.0145571	0.00595787	0.0213947	0.0028005	0.496327	0.0335716
cg11436113	0.00638474	-0.000631108	0.022144	0.00328038	0.773123	0.847468
cg08266095	-0.031257	0.00207875	0.0411963	0.00414274	0.448119	0.615906
cg15417641	-0.0126449	0.00256507	0.0647009	0.00596131	0.845076	0.667059
cg09701700	-0.0249289	-0.00113267	0.0296642	0.00286024	0.400825	0.692168
cg02375409	0.0580475	0.00272008	0.0343792	0.00349036	0.0915118	0.43594
cg05906166	-0.0814089	-0.00349038	0.0628939	0.00461996	0.195733	0.450087
cg03194226	-0.0370873	0.00224673	0.0295883	0.00477133	0.21017	0.637804
cg26361535	-0.0289539	0.00388809	0.0415184	0.00373089	0.48567	0.297545
cg13543915	-0.0127119	-0.00131086	0.0190865	0.00273504	0.505472	0.631818
cg10592592	0.0218074	-0.00313102	0.0332586	0.0032211	0.512115	0.331217
cg27178191	0.00867516	-0.00350229	0.0167585	0.00234379	0.604753	0.135343
cg11071448	-0.0269743	0.00281778	0.0282399	0.0048924	0.339579	0.564749
cg01692968	-0.073714	-0.00230376	0.0372861	0.00555017	0.0481706	0.678152
cg00533649	-0.0216083	0.00133816	0.026797	0.00220832	0.420156	0.544646
cg09762515	-0.0373237	0.00558849	0.0285694	0.00469212	0.191537	0.233859
cg04324758	-0.152465	0.00934698	0.0612372	0.0091419	0.0128578	0.306766
cg24090911	0.0019034	0.00227677	0.0380781	0.00676359	0.960137	0.736455
cg07178945	0.0834853	-0.00144522	0.0331582	0.00282182	0.0119087	0.608628
cg24230340	0.0183814	-0.000215504	0.041237	0.00382171	0.655839	0.95504
cg18961281	0.0555841	-0.003903	0.0213638	0.00352958	0.00933188	0.269019
cg25305703	-0.0316756	0.00501134	0.0453624	0.00570336	0.485088	0.379746
cg08595501	0.0187404	0.00330806	0.0478052	0.00855906	0.695081	0.699191
cg10919522	-0.000303259	0.00633378	0.0324134	0.00492981	0.992536	0.199094
cg26703534	0.0233164	-0.000960619	0.0203262	0.00280605	0.251472	0.732152
cg00893603	-0.070388	-0.00219998	0.0510556	0.00454461	0.168198	0.628408
cg23126342	0.0871862	0.00872079	0.0514859	0.00584669	0.0905543	0.136053
cg01127300	0.0103379	0.00333496	0.0363285	0.00271191	0.776015	0.219015
cg20483374	0.00610821	-0.00402082	0.019083	0.00306326	0.748932	0.189555
cg21611682	-0.0050764	-0.000182183	0.0199365	0.00243214	0.799039	0.940301
cg19719391	0.0199948	-0.0023678	0.0260774	0.0034584	0.443324	0.493686
cg00378510	-0.0194073	-0.000390196	0.065395	0.00460007	0.766684	0.932415
cg26540191	-0.0636165	0.0002338	0.0664138	0.00961605	0.338238	0.980607
cg03636183	-0.0588779	-0.000211119	0.0357306	0.00347787	0.0995802	0.951605
cg22851561	-0.0625423	0.00404	0.023112	0.00404592	0.00685656	0.318203
cg03220447	0.0331693	-0.0010409	0.0213774	0.00344097	0.120895	0.762318
cg27332104	0.0209431	0.00475743	0.0257463	0.00367447	0.416059	0.195653
cg08038054	0.0827572	-0.00994326	0.037307	0.00513441	0.026646	0.0530113
cg12876356	-0.0391795	0.00285986	0.0573799	0.00536795	0.494826	0.594289
cg25013095	-0.0286645	0.0145002	0.0589913	0.0112536	0.627073	0.1978
cg13787850	0.0248476	-0.00141689	0.0344331	0.00397685	0.470622	0.721686
cg07090714	-0.016371	-0.00281373	0.0334165	0.00355911	0.624262	0.42934
cg09247392	-0.0242068	0.00977762	0.0204479	0.00334348	0.236603	0.00351079
cg00295485	-0.00251023	-0.00657599	0.029172	0.00394404	0.931436	0.0956895
cg12303084	-0.0251014	0.00180362	0.0285985	0.00300704	0.380222	0.548746
cg24838345	-0.0498831	0.0115618	0.0514274	0.00837684	0.332161	0.167758
cg00968616	-0.00857638	0.00132295	0.0193028	0.00291932	0.656865	0.650501
cg15059804	0.0189029	0.00596978	0.0413255	0.00351515	0.647436	0.0896911
cg19838043	0.0122152	0.00135794	0.0286172	0.00302806	0.669544	0.653903
cg16219322	0.00589163	-0.00582348	0.0256093	0.00477808	0.818065	0.223142
cg23230929	-0.0121985	0.00149624	0.0224178	0.00241988	0.586411	0.536477
cg07954423	0.00803396	-0.0022267	0.0366097	0.00490556	0.826323	0.649967
cg05329352	-0.0218143	-0.00160847	0.0384221	0.0033931	0.570282	0.63555
cg13074055	-0.0313632	8.37117e-05	0.0693685	0.00902568	0.651231	0.992601
cg02556928	-0.0644995	0.00568447	0.0414042	0.00418937	0.119469	0.175054
cg21446172	-0.0259099	0.00492342	0.0261304	0.00350931	0.32153	0.160868
cg16116321	-0.0238367	0.000893197	0.0288768	0.00274918	0.409229	0.745312
cg16178855	-0.0382991	0.00607425	0.0202086	0.00267774	0.0582143	0.0234677
cg03004371	0.0114182	0.0042688	0.0490358	0.0043071	0.815906	0.32182
cg09935388	-0.0917036	-0.00224569	0.0571893	0.00542456	0.109017	0.678953
cg19940644	-0.0350204	-0.000794166	0.0423013	0.00441593	0.407854	0.857305
cg10691866	0.0379258	0.00205502	0.0413645	0.00342197	0.359355	0.548254
cg27312979	0.00275317	0.00109201	0.0545611	0.00404856	0.959762	0.787413
cg11430077	-0.0482987	-0.000368128	0.0493248	0.00609199	0.327608	0.951824
cg12126344	-0.00781381	-0.00314499	0.0247144	0.00421039	0.751906	0.455226
cg10062919	0.000437059	0.00130613	0.0145583	0.00197973	0.976053	0.509531
cg09465703	0.034963	-0.0100924	0.0679011	0.0071878	0.606683	0.160532
cg26703507	-0.0109077	0.000143956	0.0332966	0.00464522	0.743253	0.975282
cg12474798	0.0122116	0.00173688	0.0486698	0.00400393	0.801919	0.664512
cg01272202	-0.0278412	0.00893962	0.0267804	0.00383387	0.29864	0.0198676
cg06819357	-0.0206908	0.00256772	0.0319018	0.00356375	0.516695	0.471341
cg07381806	0.0536905	-0.00868501	0.0522519	0.00821821	0.304284	0.290803
cg24497361	0.0231199	-0.00312683	0.0230132	0.00277198	0.315205	0.259526
cg08757670	-0.0104693	-0.00431437	0.0208293	0.00364146	0.615274	0.236315
cg26669717	0.0217784	0.000204979	0.0193284	0.00280524	0.259975	0.941762
cg15542713	0.0131174	0.00461853	0.0602007	0.00582093	0.827539	0.42767
cg01218206	-0.0164985	0.00343761	0.0309368	0.00524398	0.593878	0.512241
cg01015663	0.0177658	-0.00358053	0.0255986	0.00355649	0.487751	0.314237
cg22100563	0.032603	-0.00377213	0.0331414	0.00528981	0.32534	0.475917
cg24996979	-0.00816038	-0.00787009	0.0236662	0.00357272	0.730269	0.0277812
cg22635676	-0.0491253	0.00759723	0.163412	0.0119127	0.763744	0.523754
cg25197194	-0.0313949	-0.00210115	0.0347051	0.00413549	0.365786	0.611486
cg16062877	-0.0261643	0.00358148	0.0167896	0.00280005	0.119283	0.201098
cg00210249	0.0395016	0.00378667	0.0400335	0.00448892	0.323918	0.399073
cg27467282	0.00708736	0.00891797	0.0338735	0.00490732	0.834289	0.0694036
cg05677062	-0.0201491	0.00194112	0.0347092	0.00379695	0.561645	0.609275
cg15498134	-0.018023	0.000716948	0.0430204	0.00693277	0.675298	0.91765
cg09084391	-0.0489439	0.00839617	0.0642845	0.00778483	0.446536	0.280997
cg03254067	0.0285025	-0.00424171	0.0281622	0.00475174	0.3116	0.372201
cg11094248	0.00698249	-0.000614913	0.0184066	0.00323708	0.704463	0.849371
cg15963463	0.0129584	-0.0021663	0.0238392	0.00352305	0.58679	0.538736
cg01763916	-0.0285528	0.000409302	0.0219682	0.00360966	0.193821	0.909738
cg06321596	-0.0341919	-0.000179485	0.0358154	0.00454506	0.339865	0.968506
cg12513616	0.0194422	-0.000340715	0.0245465	0.00279845	0.428434	0.903115
cg11701312	0.00640472	-0.00170399	0.0172764	0.00210694	0.710888	0.418807
cg04858631	-0.00220684	0.00641497	0.0337162	0.00601258	0.947818	0.286203
cg11390978	-0.00620436	-0.00433322	0.0597851	0.0109953	0.917354	0.693573
cg27262054	0.0199872	0.000556767	0.0331633	0.00347366	0.546795	0.872684
cg24688690	-0.0104863	-3.65943e-05	0.0147992	0.00235464	0.478662	0.987603
cg06369322	0.0258468	-0.00178183	0.0183604	0.00271747	0.159351	0.512136
cg04673446	0.0145043	0.000951736	0.0205373	0.00377934	0.480103	0.801215
cg19325791	-0.000902037	0.00339897	0.0310239	0.00519161	0.976807	0.512774
cg19744173	0.00389215	0.00137021	0.0222565	0.00309311	0.861194	0.657848
cg07029024	0.0278853	-0.00616623	0.0326493	0.00447533	0.39316	0.168496
cg25317941	0.00739096	0.00422702	0.0198891	0.00360088	0.710215	0.240656
cg25727671	-0.0362408	-0.00177679	0.0508499	0.00847797	0.4761	0.834031
cg26850624	0.101981	-0.00219584	0.0567282	0.00394146	0.0724288	0.577548
cg13518625	0.0110882	0.000346218	0.0789229	0.0120368	0.888283	0.977058
cg17566560	-0.0329027	-0.000819181	0.0252061	0.00479724	0.191892	0.864438
cg16611234	-0.109093	0.00636652	0.0444614	0.00495902	0.0142378	0.199433
cg16151538	0.0107991	-0.00043914	0.023692	0.00426742	0.648564	0.918054
cg04368724	0.0192881	0.000626167	0.0401223	0.00457041	0.630765	0.891048
cg14264316	-0.0105972	0.00409549	0.0269874	0.00495564	0.694593	0.408712
cg26151910	0.0384701	-0.00301392	0.0363093	0.00593527	0.289477	0.611682
cg26486070	-0.066218	0.00843281	0.036438	0.00356801	0.0693568	0.0182539
cg14254999	-0.0108794	0.00622891	0.0431755	0.00792339	0.801076	0.431927
cg00699986	-0.044934	0.00247616	0.0261162	0.00437546	0.0854645	0.571547
cg06688763	0.0266216	0.00773217	0.0709106	0.00556432	0.707397	0.164891
cg15700587	0.00989443	-0.00693707	0.0280223	0.00518595	0.724049	0.181236
cg03489965	0.075937	-0.00525488	0.0378976	0.00428631	0.0452495	0.220434
cg07413467	0.0505601	-0.00395112	0.0396564	0.00378538	0.202506	0.29678
cg01731783	-0.000127357	0.00159745	0.0145827	0.00249759	0.993033	0.522547
cg06635952	0.00591359	0.00505911	0.0237309	0.00314805	0.803237	0.108285
cg17087741	-0.0513973	0.00451889	0.0641815	0.0108551	0.423323	0.677266
cg20438687	-0.0224411	7.75101e-05	0.0310937	0.00358052	0.470558	0.982732
cg07986378	0.0129242	0.00983272	0.0405151	0.00701134	0.749756	0.161036
cg22356527	0.0256752	-0.00601909	0.0288944	0.00525769	0.374309	0.252497
cg01839993	-0.000334572	0.000801353	0.0284945	0.0027007	0.990633	0.766728
cg13020466	-0.0428436	0.0103461	0.0251287	0.00425822	0.0883305	0.015248
cg01951879	-0.0257554	0.005063	0.0406388	0.00561317	0.526305	0.367232
cg24931658	-0.0182695	-0.0010689	0.0239509	0.00295557	0.445684	0.717667
cg16398761	0.0108398	-0.00602339	0.0586986	0.00988078	0.853505	0.542228
cg26196424	0.0340293	0.00440113	0.0342516	0.00514204	0.320573	0.392206
cg14563949	-0.000747281	-0.00146739	0.0183706	0.00290238	0.967556	0.613236
cg09554443	-0.0269702	0.00333437	0.028667	0.00279431	0.34694	0.232982
cg07069636	-0.00988535	0.00111943	0.0199123	0.00240148	0.619641	0.641195
cg09560590	-0.0607718	0.0010576	0.0314053	0.0032805	0.0531463	0.747208
cg04907244	-0.0353231	0.00277384	0.0520038	0.00497536	0.497083	0.577273
cg23576855	-0.0360125	-0.00251865	0.136818	0.00566809	0.792425	0.65686
cg16519923	0.00518901	0.00143053	0.0236313	0.00391792	0.826216	0.71508
cg04806562	0.0019608	-0.000534272	0.0172787	0.00258326	0.90966	0.836182
cg12619504	-0.0526748	0.00330483	0.0306783	0.00264905	0.0861754	0.21242
cg09848445	0.010222	-0.00366475	0.0585133	0.0106347	0.861333	0.730449
cg26477856	-0.00142676	0.000549137	0.0167614	0.00269752	0.932172	0.838721
cg24556382	-0.024067	0.00146345	0.0436059	0.00494703	0.581072	0.767413
cg23401251	0.0214044	0.00751616	0.0256236	0.00400689	0.403614	0.0609051
cg19859270	-0.00419777	-0.000967287	0.0381528	0.00704118	0.912398	0.890755
cg19459791	-0.0214363	0.00306189	0.0348632	0.00430386	0.538716	0.476948
cg11231349	-0.00550381	0.000747752	0.049426	0.00699993	0.911346	0.914946
cg03399898	-0.144881	0.00162821	0.0594526	0.00489579	0.0149255	0.73951
cg16255816	-0.00782041	-0.000806328	0.0288136	0.00343744	0.786103	0.814578
cg10874644	-0.0153484	0.00653035	0.0562152	0.00731147	0.784859	0.371934
cg17668731	-0.00620755	0.0057004	0.0178171	0.00316814	0.727566	0.0722064
cg14435720	0.105482	-0.00367668	0.0749838	0.0115391	0.159649	0.750061
cg09658497	-0.113527	0.00346963	0.0881787	0.00747132	0.198123	0.642444
cg06885459	-0.00855305	0.00414255	0.0327109	0.00312374	0.79376	0.185022
cg01207684	-0.10852	0.00585321	0.0555569	0.00692798	0.0509295	0.398342
cg08606254	-0.0188911	0.00607079	0.048191	0.00701507	0.695093	0.386983
cg00336149	-0.0239339	0.00236388	0.0453045	0.00316668	0.597378	0.455511
cg21473814	-0.041212	0.00793102	0.0332277	0.00388717	0.21503	0.0415223
cg18146737	-0.0593285	0.00274833	0.156872	0.0147085	0.705334	0.851805
cg02583484	-0.03432	-0.00509709	0.0269677	0.00255786	0.203332	0.0465055
cg20357806	-0.00994349	0.00062785	0.0306984	0.00494194	0.746036	0.898924
cg06972908	-0.0286502	8.87609e-05	0.0241212	0.00422792	0.235042	0.983254
cg04701628	0.0049127	-0.00290215	0.0177951	0.00310204	0.782518	0.349671
cg26718213	-0.0461837	0.000812982	0.0772507	0.00489666	0.550038	0.868162
cg16201146	-0.0184728	0.00355239	0.0268019	0.00415045	0.490748	0.392212
cg25748521	0.010455	-0.00162369	0.0219521	0.00369084	0.633932	0.660066
cg13193840	-0.10858	0.00583181	0.057926	0.0109445	0.0609827	0.594228
cg20684110	0.0135633	0.00548229	0.0421147	0.00397804	0.747453	0.168406
cg15806304	-0.0221519	0.00713884	0.023821	0.00313862	0.352521	0.0230992
cg26844633	-0.0104918	0.00622602	0.0434694	0.00700897	0.809298	0.374547
cg03348792	-0.00344665	0.0104494	0.0274277	0.00403856	0.90001	0.00977741
cg08035323	0.0667734	-0.00589075	0.0448829	0.00410428	0.137021	0.151453
cg21188533	-0.0289781	0.00441284	0.0788182	0.0061118	0.713181	0.470413
cg23441210	0.0180467	-0.00302123	0.0265406	0.00493458	0.49659	0.540475
cg11557553	-0.00989022	0.00440939	0.0208775	0.0037321	0.635737	0.237632
cg13428066	-0.0162037	0.000474778	0.0224893	0.00361488	0.471287	0.895528
cg13937905	-0.140592	0.00481366	0.053109	0.00636149	0.00818581	0.449378
cg22407942	-0.0620161	-0.000754875	0.045001	0.00388979	0.168369	0.846155
cg20295214	-0.00826755	0.00589997	0.032289	0.00548206	0.797935	0.282022
cg26364091	-0.00451787	-0.00130042	0.0215869	0.00286524	0.834245	0.650006
cg26963277	-0.123232	0.00629885	0.0552583	0.00630451	0.0258642	0.317933
cg10678215	-0.0291064	0.00582261	0.0366235	0.005658	0.426846	0.303625
cg08972170	0.0406508	0.00160026	0.0359302	0.00498065	0.258028	0.748039
cg10965178	-0.018624	-0.000202842	0.0267137	0.0032858	0.485783	0.950785
cg01481251	-0.0648253	-0.00721851	0.0511416	0.00797877	0.205085	0.365784
cg25949550	-0.0465169	0.000468581	0.0325401	0.00385456	0.153025	0.903262
cg14580211	-0.0304899	0.00282829	0.0291003	0.00371768	0.294884	0.446934
cg19816811	-0.093124	0.00468202	0.0418316	0.00309242	0.0261526	0.130264
cg24698211	-0.0386965	-0.00202841	0.0300558	0.00343753	0.198091	0.555242
cg25921609	-0.000702474	0.000191427	0.0341978	0.0046185	0.983613	0.966945
cg20305005	0.0060056	0.00533498	0.0306269	0.00423846	0.84456	0.208363
cg10592478	-0.0863615	0.00664612	0.0421629	0.00739009	0.0406386	0.368646
cg09975715	0.0105084	0.0146154	0.0330294	0.00560659	0.750397	0.0092437
cg21869609	0.0360271	-0.00513774	0.088692	0.00507172	0.684654	0.311242
cg23842572	0.00987962	0.00253943	0.0263035	0.00407571	0.70725	0.53335
cg01744331	-0.0582693	0.01049	0.0678886	0.0106539	0.390813	0.324995
cg16391678	-0.00937163	-0.00164141	0.022068	0.00356107	0.671116	0.644927
cg08666707	-0.0303943	0.00812541	0.0191866	0.00303083	0.113301	0.00743651
cg22876908	0.00100488	0.00144431	0.0188765	0.00279966	0.95755	0.606026
cg23594345	0.0182278	-0.00579401	0.0519963	0.00535819	0.725963	0.279748
cg25292882	-0.0293235	0.00327066	0.0409333	0.00731612	0.473828	0.654914
cg14817490	0.0126641	-0.0017609	0.0387705	0.00406892	0.743978	0.665255
cg26995224	0.0268982	0.00422732	0.0501731	0.00314048	0.591967	0.178513
cg19089201	0.0204213	-0.00305598	0.0993381	0.00841393	0.837151	0.716511
cg02917867	-0.0468155	0.00337921	0.0233112	0.00309636	0.0447512	0.275323
cg10403394	-0.026166	0.00199703	0.0653881	0.00487198	0.689093	0.681947
cg13038618	-0.0139898	0.0013281	0.0323199	0.00492013	0.665164	0.787255
cg11225089	-0.00866645	-0.00169968	0.0231609	0.00382313	0.708301	0.656698
cg10827488	-0.0166811	0.000905921	0.0242559	0.00366011	0.491707	0.804552
cg03660377	-0.0859084	0.00406986	0.0475221	0.00716866	0.0707832	0.570318
cg10255761	-0.0182946	0.00326461	0.0256263	0.00287176	0.475384	0.255834
cg01097768	-0.0231596	0.00625526	0.0238059	0.00449039	0.330719	0.163848
cg11666770	-0.0810062	-0.00235621	0.105328	0.00621514	0.441971	0.70467
cg17333042	-0.0352212	0.00384683	0.0205904	0.00242446	0.0873329	0.11283
cg09469355	-0.0225856	-0.0016755	0.022503	0.00269506	0.31567	0.534252
cg18900812	-0.0224873	-0.0073865	0.0468646	0.00816276	0.631388	0.365686
cg18295744	0.0101163	0.00380519	0.0201787	0.00345892	0.61618	0.271488
cg02228160	-0.0371845	-0.000998264	0.0297551	0.00319652	0.211584	0.754867
cg26788216	-0.0437395	-8.17194e-05	0.0312873	0.00420924	0.162269	0.984514
cg11207515	0.0238435	0.0106271	0.0474469	0.00565429	0.615354	0.0604041
cg20066188	0.0174076	-0.000548808	0.0453351	0.00303465	0.701052	0.856516
cg01294327	0.00408808	0.00304843	0.0644645	0.0040019	0.949444	0.44635
cg10750182	-0.0108781	-0.00120049	0.0152188	0.00240558	0.474818	0.617832
cg11145461	-0.0247667	-0.00302279	0.0370688	0.00624693	0.504116	0.628549
cg16880946	-0.0546744	0.000631329	0.0357135	0.00252824	0.126004	0.802851
cg00871371	-0.0272549	0.0029374	0.0221289	0.00309027	0.218223	0.34202
cg08899667	0.00792027	-0.000192924	0.0254838	0.0028362	0.755992	0.945779
cg11197630	-0.0867257	0.00225922	0.0467522	0.00861876	0.0637108	0.793264
cg26878655	0.000644638	0.00245035	0.0274959	0.00509613	0.981297	0.630721
cg08386009	0.00117984	0.000874331	0.0162089	0.00271457	0.94198	0.747439
cg09022230	-0.00340982	0.00222208	0.0307361	0.00349566	0.911678	0.525107
cg22937882	-0.0286667	0.00258043	0.0258417	0.00441156	0.267403	0.558699
cg03611151	-0.00745056	0.003823	0.0291505	0.00419537	0.798293	0.362338
cg15636519	-0.00464635	-0.00592106	0.042544	0.0072662	0.913043	0.415292
cg13582060	-0.0407013	-0.00173747	0.0572201	0.00791248	0.476974	0.826229
cg08947774	0.0354952	0.00221811	0.0273379	0.00412708	0.19429	0.591046
cg00324097	-0.00669002	0.00162946	0.01656	0.00247408	0.686263	0.510263
cg00911794	-0.0611895	5.84861e-05	0.0437983	0.00609453	0.162543	0.992345
cg12806681	-0.0746776	0.00544895	0.0436432	0.00612173	0.0872152	0.373581
cg20873136	0.0406575	-0.00692408	0.0236965	0.00400317	0.0863363	0.0839293
cg14165660	-0.00953056	0.0037502	0.0272675	0.00400051	0.726733	0.348711
cg05517711	-0.0136911	0.00280771	0.0165652	0.00245468	0.408613	0.25291
cg10179300	0.0085568	0.0044251	0.0391749	0.00530288	0.82712	0.404169
cg06294803	-0.00516371	-0.00285981	0.0438148	0.00597397	0.906196	0.632225
cg06151964	-0.00306442	0.00234138	0.0179119	0.00281796	0.864174	0.406197
cg06394460	-0.0528579	-0.00282487	0.0493787	0.00733474	0.284533	0.700201
cg06513247	9.55699e-05	0.000862513	0.0152782	0.00242589	0.99501	0.72224
cg19406367	0.0399266	0.00759757	0.0400328	0.00426614	0.318736	0.0751642
cg03415545	0.0120379	0.00695007	0.0515232	0.00805707	0.815285	0.388514
cg02101876	-0.0104237	0.0032252	0.0475563	0.00862079	0.826523	0.708376
cg02556393	-0.00665023	-0.00423811	0.036615	0.00459152	0.855896	0.356165
cg25421530	0.0355984	-0.000665216	0.0406479	0.00628627	0.381247	0.915741
cg01435643	0.0183956	0.00260641	0.051994	0.00474416	0.723534	0.58283
cg17814814	0.0112908	0.00389436	0.0204697	0.00317851	0.581288	0.220715
cg02013841	0.00252876	0.0126722	0.0500688	0.00942727	0.959723	0.179116
cg06949439	-0.0189576	-0.000215031	0.0300389	0.00315598	0.52806	0.94569
cg10520740	0.00342726	-0.00251901	0.0169102	0.00267116	0.839408	0.345839
cg15482893	0.0475203	-0.000921065	0.0334577	0.00499769	0.155661	0.853808
cg02782510	-0.026379	0.0130491	0.0294492	0.00487165	0.370479	0.0074864
cg14093127	-0.0142554	-0.00215232	0.0450459	0.00562476	0.751685	0.702041
cg26790897	0.00783322	-0.00217916	0.0280979	0.00420515	0.780438	0.604398
cg01856529	-0.00693604	-0.00460091	0.0315489	0.00531756	0.826006	0.387073
cg05529343	0.0583455	0.00126313	0.0762326	0.00810203	0.444163	0.876134
cg02186444	-0.0196307	0.00594883	0.0237127	0.00256802	0.407866	0.0206874
cg14142087	-0.000728095	0.00200782	0.0217701	0.00258319	0.973324	0.437144
cg12547807	0.00319203	-0.000752969	0.0202634	0.00252691	0.874846	0.765767
cg10825315	-0.0296111	0.00233891	0.0294459	0.00492168	0.314705	0.634706
cg19589396	0.0242445	0.000638883	0.0326339	0.00408089	0.457621	0.875621
cg08118908	-0.00843989	-0.00319986	0.0412128	0.00670032	0.837756	0.633038
cg00073090	0.0148891	-0.00478887	0.0216506	0.00283003	0.491725	0.0908548
cg01513913	-0.0210627	3.03867e-06	0.0286853	0.00253304	0.462895	0.999043
cg23973524	-0.0210209	0.00793732	0.034405	0.00300896	0.541299	0.00844242
cg13976502	-0.0332942	-0.000291872	0.0188035	0.00290154	0.0767584	0.91989
cg13525276	-0.0980611	-0.00325651	0.0387983	0.0053625	0.0115642	0.543775
cg13039251	0.0722448	0.00471058	0.0476938	0.00510998	0.130015	0.356783
cg08149865	-0.0123775	-0.00168117	0.0248835	0.00280139	0.618955	0.548533
cg25953130	-0.0744447	0.00702716	0.0471416	0.00593597	0.114462	0.236699
cg00501876	0.0204249	-0.00248572	0.0197629	0.00321971	0.30148	0.440237
cg05969150	-0.0263775	0.00270159	0.0177749	0.00213433	0.137989	0.205826
cg00976097	0.237159	0.00747335	0.158554	0.0103528	0.134934	0.470507
cg23565821	0.0418637	0.00357919	0.0257679	0.00360172	0.104391	0.320533
cg21161138	-0.0442404	-0.00213826	0.0279682	0.00382123	0.113848	0.575866
cg17619755	0.0252351	0.00269524	0.0433843	0.003901	0.560875	0.489745
cg11152412	0.00557785	-0.00452035	0.0306294	0.00521415	0.855514	0.386135
cg16936060	0.0154356	-0.00188881	0.0276124	0.00350857	0.576222	0.590434
cg14712058	-0.0178804	0.008436	0.0318987	0.00421088	0.575177	0.045345
cg24693803	-0.0119806	-0.00127972	0.028331	0.002756	0.672439	0.642481
cg12406027	-0.00926167	-0.00152732	0.0224928	0.00240273	0.680565	0.52511
cg17038235	-0.00058741	0.00644383	0.0251605	0.00297402	0.981376	0.0304398
cg16503724	0.028494	0.00386181	0.0220352	0.00322588	0.196113	0.231473
cg26060489	-0.0357382	0.00251135	0.019911	0.00349906	0.0727917	0.473061
cg09607043	0.0176687	0.00197265	0.0364643	0.00571319	0.628045	0.72994
cg12873476	-0.0191955	-0.00102717	0.0366516	0.00303117	0.600542	0.734764
cg00085013	0.012264	-0.00100968	0.0226377	0.00339714	0.588046	0.76635
cg26529655	0.0274392	0.00227881	0.0213571	0.00362986	0.198993	0.53025
cg19211853	0.0252964	-0.0367141	0.112913	0.015849	0.822753	0.0206868
cg02451831	-0.0328784	0.0034598	0.026409	0.00400438	0.213278	0.387747
cg06235438	0.00831381	-0.00393851	0.0257149	0.00461537	0.74649	0.393627
cg02775417	-0.0604564	0.00266487	0.0648125	0.0117799	0.351019	0.821064
cg20059928	-0.0386669	0.00389968	0.0423224	0.00311754	0.361061	0.211204
cg10951873	0.0421972	-0.00833475	0.0315959	0.00501197	0.181836	0.0965592
cg25809905	0.0669784	0.00119823	0.041268	0.00340866	0.104793	0.725253
cg16969872	0.0113719	-0.00484567	0.0358616	0.00413053	0.7512	0.240957
cg19046189	0.0235526	-0.00713166	0.0162246	0.00249051	0.146737	0.00425669
cg23667432	0.006873	0.00150758	0.019557	0.00343304	0.725293	0.660634
cg01005506	0.00689032	-0.000317371	0.0309152	0.00266131	0.82366	0.905093
cg14074174	0.0217526	-0.00034682	0.0203656	0.00216423	0.285621	0.872708
cg04956244	0.015525	-0.000183824	0.0154325	0.00247154	0.314522	0.940722
cg03345925	-0.0163678	0.00268895	0.0257998	0.00338774	0.525884	0.427497
cg27537125	0.0358342	0.00101347	0.0222762	0.00333092	0.107843	0.760978
cg20902353	0.00266617	-0.000981911	0.0171075	0.0025395	0.876167	0.699075
cg13784312	0.00834316	-0.00856526	0.127503	0.0233408	0.947833	0.713704
cg11902777	-0.00521021	0.00190208	0.0583613	0.00594492	0.928874	0.749057
cg21747070	0.0338501	6.21797e-05	0.0330023	0.00292162	0.305196	0.983024
cg17024919	-0.0422784	0.00582838	0.0676326	0.00497093	0.531989	0.241214
cg21566642	-0.180506	0.000822631	0.0497148	0.00456353	0.000291444	0.856976
cg08763102	-0.0062752	0.00317592	0.020732	0.00342643	0.762159	0.354155
cg18754985	0.00493803	6.27786e-05	0.044951	0.00883422	0.912534	0.994331
cg22132788	0.0655411	-0.00833524	0.117022	0.00907396	0.575514	0.358492
cg03646329	-0.0775724	0.0119789	0.0579477	0.00887431	0.18082	0.177303
cg14120703	-0.0265377	0.00168223	0.0156216	0.00262665	0.0894898	0.521995
cg02336104	-0.0376942	0.000295066	0.0318536	0.00294467	0.236843	0.920198
cg04813697	-0.0146165	-0.00344704	0.0359525	0.00428466	0.684384	0.421251
cg03519879	-0.0126096	0.000840004	0.0172832	0.00251078	0.465724	0.738013
cg27449150	0.0011692	-0.00167162	0.0295256	0.004563	0.968416	0.71417
cg04573702	-0.0234746	0.00140243	0.0216785	0.00307623	0.278998	0.648544
cg07465627	-0.0141765	0.00727196	0.0230244	0.00372241	0.538143	0.0509665
cg04970434	-0.0324748	0.00267557	0.0265887	0.0034613	0.222092	0.439666
cg04383058	0.020178	0.00233548	0.0280397	0.00431171	0.471833	0.588147
cg16702313	-0.00527428	0.00211184	0.0182118	0.00332955	0.77214	0.526015
cg23198793	0.00725198	-0.00413822	0.0301575	0.00416749	0.80999	0.320906
cg09578155	-0.00283419	-0.000412408	0.0146898	0.00218339	0.847028	0.850213
cg10788371	-0.0158645	-0.00124199	0.0289961	0.00254679	0.584371	0.625866
cg20103692	0.0151584	0.0046614	0.0354298	0.00629619	0.668803	0.459219
cg24741609	0.00986194	0.00225375	0.0280661	0.00297075	0.725345	0.448203
cg22539182	0.0191356	-0.000605194	0.0236146	0.00228534	0.417869	0.791193
cg12836863	0.0238896	-0.00299317	0.0235469	0.0042262	0.310417	0.478923
cg14977938	0.00121612	0.00381718	0.0299537	0.0033101	0.967619	0.249044
cg06433467	0.0627243	0.00416816	0.0614233	0.0073009	0.307303	0.568159
cg18991417	0.0351142	0.00125487	0.0273999	0.00366426	0.200153	0.732059
cg05957567	0.0102594	0.00169282	0.0210198	0.00287295	0.625545	0.555812
cg02035751	-0.0244695	0.00577313	0.0191456	0.00287215	0.201359	0.0446373
cg19847577	-0.00121765	0.000258691	0.0323317	0.00312362	0.969963	0.934009
cg01442064	-0.0331639	-6.25318e-05	0.0223755	0.00334307	0.138445	0.985079
cg15087369	-0.0282674	0.00724819	0.0312759	0.00484447	0.366195	0.134851
cg16983588	0.0355781	-0.00180382	0.0406373	0.00401687	0.381427	0.653462
cg14179389	-0.0474716	-0.00345009	0.0575309	0.00580314	0.409406	0.552269
cg04258133	0.073492	-0.00182059	0.0376667	0.00453913	0.0511945	0.688421
cg09099830	-0.000354281	-0.00112303	0.0284497	0.00276487	0.990066	0.684681
cg24719910	0.00892845	0.00629698	0.043443	0.00832386	0.837181	0.449486
cg04018738	0.0310414	0.0019761	0.0685752	0.00590068	0.650855	0.737761
cg19825437	0.0188133	0.0022243	0.0289304	0.00345234	0.515583	0.519502
cg09570614	-0.014229	0.00467431	0.02248	0.00249336	0.526841	0.0610591
cg24158160	0.0345581	0.00343416	0.0255617	0.00452259	0.176515	0.447791
cg21913886	-0.052416	-0.000249074	0.0402324	0.00465589	0.192799	0.957345
cg00835193	-0.00164897	0.00763929	0.0454171	0.00521752	0.971041	0.143393
cg23673974	0.00217503	0.00461278	0.0212111	0.00376215	0.918335	0.220384
cg01668352	0.0266315	-0.00753097	0.0313373	0.00623331	0.395495	0.227196
cg11253886	0.0255458	0.00116451	0.0332046	0.00300856	0.441802	0.69877
cg18316974	-0.165547	0.0218018	0.113782	0.0129427	0.145861	0.0923348
cg18625627	-0.0772213	0.000697227	0.0403796	0.00567278	0.0559653	0.902199
cg07063068	-0.0403154	-0.00966997	0.0580045	0.0093931	0.4871	0.303447
cg26271591	-0.0250051	0.00206036	0.043601	0.00682715	0.566365	0.762862
cg10814005	-0.0403215	0.00083806	0.0369601	0.00512791	0.275425	0.870205
cg24049493	0.0171724	0.00339272	0.0729063	0.00556222	0.813821	0.541996
cg03316752	0.022138	0.00255195	0.0445126	0.00759477	0.618994	0.736914
cg05302489	0.0730852	-0.000631708	0.0435849	0.00507062	0.0937483	0.900874
cg12729894	-0.00775756	0.00470653	0.022498	0.00323396	0.730272	0.145819
cg03957124	-0.00377467	0.000574335	0.0203835	0.00338682	0.853102	0.865367
cg11824827	0.00582992	-0.00541898	0.0258432	0.00317593	0.821546	0.0881998
cg14089503	-0.0155669	0.00612667	0.0357042	0.00434974	0.662892	0.159226
cg19925780	-0.0048533	0.000673273	0.0404301	0.00582401	0.904462	0.907985
cg01017464	-0.00522791	0.00527631	0.0387816	0.00469341	0.892782	0.261139
cg22845855	-0.0222698	0.0102126	0.0407116	0.00590772	0.584427	0.0841023
cg22870429	-0.0263092	0.00249479	0.0248505	0.00358574	0.289858	0.486709
cg03109660	-0.0121617	0.0069515	0.023332	0.00387074	0.602245	0.072741
cg17924476	0.0562511	0.00097012	0.0407567	0.00368172	0.167728	0.79221
cg22891595	-0.0160722	0.0050646	0.0227592	0.00295559	0.480159	0.0868468
cg01940273	-0.0761016	-0.000308675	0.0331967	0.00345842	0.0220022	0.928895
cg04716530	-0.0265246	0.00413123	0.027772	0.00448545	0.339637	0.357213
cg11554391	-0.0262817	-0.00165917	0.0366593	0.00488049	0.47351	0.733942
cg23233742	-0.0443704	0.00147431	0.0285677	0.00306077	0.120568	0.630114
cg25648203	-0.0103582	0.00654347	0.0315472	0.00426107	0.742688	0.124871
cg14675361	-0.0247295	0.011981	0.0441862	0.00615496	0.575769	0.0518034
cg23219570	0.0434252	-0.00204679	0.029089	0.00350959	0.135647	0.559859
cg22998476	-0.0324727	-0.00132162	0.0257385	0.00316922	0.207239	0.676737
cg27405731	-0.0528068	0.00936971	0.0311517	0.00396242	0.0902105	0.0181969
cg11690578	-0.0513474	0.0065904	0.0337473	0.00475222	0.12828	0.165739
cg20244340	-0.037032	-0.00303234	0.0386795	0.00300855	0.338516	0.313687

## Sheet: all results TSQL6
CpG site	cross-sectional coefficient TSQL 6	longitudinal coefficient TSQL 6	cross-sectional coefficient SE TSQL 6	longitudinal coefficient SE TSQL 6	cross-sectional coefficient pvalue TSQL 6	longitudinal coefficient pvalue TSQL 6
cg05575921	-0.0224304	-0.012825	0.0925641	0.0106506	0.808558	0.228749
cg23079012	-0.0332824	0.0168162	0.0732737	0.00990297	0.64972	0.089735
cg06126421	-0.0533775	-0.00334327	0.0505394	0.00452657	0.291058	0.460291
cg25512107	-0.0477156	0.00644133	0.0523195	0.00980736	0.361853	0.511433
cg07251887	0.00947163	-0.00414322	0.0243266	0.00321615	0.697058	0.197889
cg14753356	-0.0279666	-0.000274157	0.0265889	0.00357981	0.293012	0.938966
cg25189904	0.0387573	-0.004747	0.0573497	0.00497239	0.499263	0.339922
cg15022400	0.0024889	-0.00214411	0.0305538	0.00379713	0.935085	0.5724
cg15187398	0.00565061	0.000605363	0.0392642	0.00337289	0.885588	0.85759
cg05875421	-0.0387229	0.00708378	0.0335334	0.00563643	0.248305	0.209055
cg13184736	0.146121	-0.00760676	0.0782706	0.00672591	0.0621073	0.258286
cg23161492	-0.0167847	0.00291469	0.0451795	0.0036837	0.710307	0.42895
cg09338136	-0.0553694	0.00484062	0.032464	0.00390635	0.0882579	0.21551
cg12147622	0.016285	0.00179859	0.0316972	0.00442819	0.607471	0.684687
cg24540678	-0.00744072	-0.00289278	0.0288057	0.00375182	0.796197	0.440829
cg07306253	0.00110754	0.000170297	0.0222236	0.00387848	0.960257	0.964984
cg15474579	-0.0237111	-0.000802977	0.0282427	0.00352576	0.401269	0.81988
cg13399816	0.10645	-0.00159513	0.0400684	0.00342059	0.00797224	0.641057
cg07202214	0.0605109	-0.00558086	0.0311557	0.00362363	0.052269	0.123777
cg10380221	-0.00403232	-0.00084731	0.0346273	0.0037666	0.90731	0.822052
cg25469474	0.00116874	0.0296611	0.0729839	0.0120328	0.987225	0.0138298
cg23916896	-0.033079	0.00334735	0.0655632	0.00836967	0.613943	0.689268
cg04225775	0.0264155	-0.000850094	0.0335725	0.00389983	0.43149	0.827477
cg04180046	-0.0715096	0.00054874	0.0418669	0.00317983	0.0878405	0.863018
cg01836137	0.0268563	-0.0015632	0.0291383	0.0031951	0.356821	0.624748
cg18446336	-0.0756428	0.00271262	0.0519332	0.00405768	0.145452	0.503925
cg05194346	-0.000256275	0.00251993	0.0409832	0.00394571	0.995011	0.523164
cg02257517	0.0239862	0.000843783	0.0225115	0.00279715	0.286782	0.762962
cg19827923	-0.0350193	0.0098313	0.0202862	0.00342867	0.084429	0.00420532
cg26856289	-0.00192919	-0.00736085	0.0287104	0.0041585	0.946433	0.07695
cg19717773	-0.150112	-0.00128044	0.0766068	0.00537745	0.0502423	0.811832
cg01439566	0.000709893	0.00126334	0.022501	0.00405003	0.974834	0.755141
cg13578465	0.0673072	-0.00339176	0.0589875	0.00451838	0.254035	0.452995
cg26077378	-0.048338	0.0135902	0.0644886	0.00678946	0.453623	0.045528
cg03234777	-0.00751782	0.00397372	0.0414655	0.0052428	0.856149	0.448626
cg03440944	0.0222328	0.00573637	0.0305701	0.00542924	0.467127	0.290905
cg03274391	0.0420093	0.00156452	0.0960614	0.00664844	0.661946	0.813996
cg09717146	-0.0198075	0.00768168	0.0284932	0.00488229	0.487019	0.115874
cg08709672	0.00585869	-0.00212469	0.0277846	0.0029602	0.83302	0.473041
cg19713851	0.0295427	-0.0188898	0.0774765	0.00620546	0.703025	0.00238154
cg11621113	0.0165092	-0.00360814	0.0273318	0.00337034	0.545897	0.284569
cg24859433	-0.0471042	0.00259627	0.0351819	0.00510073	0.180755	0.610839
cg25560398	-0.0101163	-0.000769007	0.0242562	0.00434154	0.676671	0.859435
cg04885881	-0.00495173	7.30886e-05	0.0371097	0.00382663	0.893865	0.984764
cg14624207	-0.00197877	-0.00255015	0.0212019	0.00310061	0.92565	0.410964
cg03547355	-0.0060301	-0.00154111	0.0234896	0.0034633	0.797424	0.656405
cg16815882	0.0111931	-0.00317924	0.021525	0.00348419	0.603109	0.36169
cg03707168	0.0119241	-0.00100318	0.0330704	0.00435093	0.718461	0.817688
cg21121843	-0.0142053	-0.00593899	0.044791	0.00548553	0.751169	0.279159
cg22117188	-0.0122321	-0.00146662	0.0166349	0.00287704	0.462213	0.610303
cg02532700	0.0157391	-0.00710746	0.0457309	0.00449107	0.730764	0.113765
cg26242531	8.12636e-05	-0.00210594	0.0239741	0.00310128	0.997296	0.497225
cg19888787	0.0241086	0.0136997	0.0695242	0.012848	0.728795	0.286487
cg24173182	0.0163708	0.000765329	0.0314935	0.00408391	0.603253	0.851377
cg20810975	-0.00310713	-0.00377913	0.0184882	0.00318218	0.86655	0.235214
cg18503679	-0.160169	-0.0278675	0.250301	0.0343589	0.522306	0.417476
cg16556677	-0.0406832	0.00167784	0.029741	0.00433914	0.171483	0.69906
cg16145216	0.0664522	-0.00462434	0.0452611	0.00352773	0.142258	0.19014
cg21949830	0.0536635	-0.00285029	0.0467346	0.00696066	0.250988	0.682251
cg11229399	0.0954538	-0.0091871	0.0420528	0.00478883	0.0233343	0.0552727
cg26701785	0.178662	-0.0125192	0.0859782	0.00711576	0.0378748	0.0787557
cg10841124	0.0688463	0.00217747	0.0438573	0.00632784	0.116617	0.73082
cg19798735	-0.111896	0.0211408	0.0463615	0.00881603	0.0158669	0.0166242
cg18404811	-0.0105166	0.0027917	0.0264392	0.00411712	0.690839	0.497848
cg00871610	-0.0245376	0.00255675	0.0311336	0.0039784	0.430713	0.520561
cg01899089	0.0173627	0.000896981	0.0271473	0.00352366	0.522524	0.799104
cg19572487	-0.0276695	-0.00386412	0.0347678	0.00499178	0.426218	0.439015
cg09716613	0.0772736	-0.00819921	0.0342193	0.00430038	0.024047	0.0567903
cg18758622	-0.0031442	-2.94495e-05	0.0197854	0.00293301	0.873751	0.99199
cg11730703	0.0787223	-0.00276635	0.0519931	0.00482827	0.130199	0.56678
cg08375941	-0.0410477	-0.00101053	0.0555568	0.0110139	0.460069	0.926904
cg13418576	0.0151601	-0.00312408	0.0347294	0.00541442	0.662501	0.564043
cg05284742	1.99184e-05	-0.00365415	0.0212636	0.00342691	0.999253	0.28648
cg03329539	0.0333451	-0.00666376	0.0303819	0.00414845	0.272539	0.108449
cg13185177	0.0611534	0.00612855	0.0384327	0.00481848	0.111735	0.203644
cg09197783	-0.00321118	-0.000386226	0.0270215	0.00410274	0.905414	0.925013
cg27310319	-0.00245736	0.000896527	0.0350304	0.00595564	0.944081	0.880367
cg10420527	-0.0116153	-0.000265151	0.0182148	0.00229513	0.523758	0.908045
cg07180646	-0.0437151	0.000637194	0.037158	0.00298174	0.239592	0.830816
cg09662411	0.0182688	-0.0106149	0.0459709	0.00530928	0.69112	0.045782
cg04551776	-0.0171232	0.00879125	0.0291716	0.00449718	0.557275	0.0508176
cg10251229	0.0514173	-0.000824493	0.0244339	0.00360559	0.0354653	0.819162
cg18092474	-0.074641	-0.0103007	0.0617144	0.0051213	0.226671	0.0444942
cg13247990	-0.0120372	0.00284272	0.0200723	0.0033393	0.54877	0.394763
cg01832549	-0.0252465	0.000972465	0.0316757	0.00280377	0.425553	0.728766
cg08884752	-0.0515984	-0.000235944	0.0272772	0.00383597	0.0586804	0.950964
cg19713429	0.00108764	-0.00678606	0.0351446	0.00377478	0.975315	0.0724529
cg27241845	0.00594232	-0.0110496	0.0332123	0.00401786	0.85802	0.00604017
cg02385153	0.0181088	-0.0087476	0.0368105	0.00661459	0.622801	0.186247
cg11660018	-0.0103443	-0.00589431	0.0285741	0.00268618	0.717387	0.0283918
cg21486510	0.0480981	-0.00805284	0.021688	0.00343402	0.0266729	0.019179
cg16047567	-0.00612171	-0.00293251	0.0365253	0.00347832	0.866917	0.39934
cg00310412	0.0129734	0.000458486	0.0255034	0.00236937	0.611038	0.846593
cg05508862	-0.0102562	-0.00142043	0.0217582	0.00237422	0.637432	0.549763
cg17372101	0.0592282	-0.00492334	0.0338536	0.00396345	0.0803678	0.214394
cg19956914	0.0739764	-0.000101576	0.0465176	0.00320445	0.111985	0.974717
cg06644428	-0.158517	0.0116343	0.0814122	0.0111237	0.0516624	0.295802
cg01882991	0.0178251	-0.00383504	0.0301049	0.00348619	0.553858	0.271508
cg15693572	-0.0309303	0.00536161	0.0795569	0.00553937	0.697494	0.333269
cg21322436	-0.0605206	0.00352154	0.0360066	0.00565958	0.0929358	0.533902
cg17287155	0.00264696	0.00528177	0.0460388	0.00700604	0.954157	0.451053
cg05460226	-0.00784038	-0.00247494	0.0321555	0.00474246	0.807388	0.601851
cg05183538	-0.045727	0.00066345	0.0461744	0.00681302	0.322134	0.92244
cg06459104	-0.0742032	-0.00822247	0.0677314	0.00488741	0.273454	0.0927373
cg23771366	-0.0393708	-0.00274224	0.0320569	0.00295105	0.219572	0.352942
cg01429256	0.0195018	-0.00375369	0.0135238	0.00229396	0.149424	0.102014
cg24389054	0.00397686	0.00641822	0.0423482	0.00546008	0.925191	0.240016
cg23067299	0.0712992	-0.0160584	0.0686581	0.0100437	0.299171	0.110098
cg11902728	0.0399941	-0.00159696	0.0238201	0.00350182	0.0932972	0.648441
cg25212025	0.054547	0.00152212	0.0385336	0.00343326	0.157098	0.657591
cg01873977	-0.027211	0.00292336	0.0447467	0.00574952	0.543186	0.611222
cg04517079	-0.0580928	0.0036186	0.0246951	0.00258729	0.0187661	0.162172
cg18335991	0.025187	-0.00330728	0.0242637	0.00374766	0.299358	0.377675
cg01756424	0.0181357	-0.0014684	0.01504	0.00224708	0.228013	0.51357
cg08472795	-0.0136951	0.00898795	0.0248571	0.00358436	0.581724	0.0122782
cg05824218	0.0220197	3.4619e-05	0.0170298	0.00273363	0.196138	0.989898
cg25730428	0.0064381	-0.00234167	0.0289141	0.00336251	0.823823	0.486298
cg07826859	0.0109172	-0.00277461	0.0202494	0.00329712	0.589845	0.400212
cg00689360	0.0120599	-0.016145	0.0495301	0.00664229	0.807654	0.0152072
cg15212295	0.0235835	-0.00639312	0.0301146	0.00512741	0.43363	0.212675
cg07339236	-0.0252576	-0.0153967	0.0541028	0.00951373	0.640653	0.105823
cg19254163	-0.0057305	-0.00325785	0.0240913	0.00307945	0.81201	0.290282
cg19918734	0.0376872	-0.00244495	0.0255887	0.00428921	0.140935	0.568761
cg12076915	-0.0149659	-0.00342702	0.0391658	0.00325245	0.702427	0.292229
cg06595162	-0.00502242	-0.00581167	0.0263923	0.0034087	0.849095	0.088443
cg15408734	-0.0221511	-0.0043202	0.0298362	0.0043824	0.457912	0.324411
cg04044720	-0.0493289	0.00863481	0.0309854	0.00491491	0.111523	0.0791848
cg26707709	-0.0219296	0.00604592	0.0914917	0.00706943	0.810603	0.392588
cg15342087	-0.0113785	-0.00279157	0.0351999	0.00498586	0.746535	0.575646
cg02980249	-0.030538	4.15142e-05	0.0253256	0.00272009	0.228056	0.987826
cg24681208	0.0110398	-0.00109332	0.0208817	0.00326821	0.597078	0.738032
cg03991871	0.0240161	0.00303297	0.0573234	0.00540034	0.675303	0.574467
cg18642234	-0.0160161	-0.00282593	0.0205782	0.00270854	0.436483	0.296985
cg13500388	-0.00329943	-0.000129702	0.0267239	0.00414501	0.901751	0.975042
cg19593285	0.0465941	0.00143387	0.0381413	0.00585176	0.221983	0.806471
cg04359840	-0.0439551	0.00630996	0.0318477	0.00366628	0.167707	0.0854746
cg00563932	0.014152	-0.00284238	0.022126	0.00282069	0.522506	0.313799
cg03999941	0.0444435	0.00108709	0.0420918	0.00604964	0.291151	0.857421
cg03604011	0.0242174	0.00254175	0.0937047	0.0132805	0.79609	0.848251
cg12075928	0.0170155	0.000477679	0.0404641	0.00672508	0.674154	0.943385
cg10012530	-0.0113803	0.00570303	0.0265962	0.00420905	0.668772	0.175671
cg14906103	0.00557915	-0.00598246	0.0272869	0.00431507	0.838011	0.165861
cg13832201	-0.02376	0.00324603	0.0289794	0.0033473	0.412384	0.332356
cg00541303	0.0197094	-0.00311792	0.0324443	0.00432873	0.5436	0.47148
cg13127741	-0.00301208	-0.00243058	0.0279919	0.00334642	0.91432	0.467774
cg23110422	-0.00437055	-0.00289967	0.0464155	0.00693641	0.92499	0.675991
cg14012925	0.0642165	-0.0014646	0.032617	0.00387478	0.0491261	0.705506
cg17971600	0.00734299	-0.00477218	0.0134138	0.00228261	0.584139	0.0367489
cg21140898	0.036375	-0.00272401	0.0676183	0.00860203	0.590676	0.751546
cg20303561	-0.0518322	0.00291293	0.0348458	0.0041563	0.137062	0.483524
cg21393163	0.0127885	-0.0095597	0.0518791	0.00556939	0.805319	0.0863153
cg01208318	-0.064218	0.0110848	0.0553748	0.00471832	0.24635	0.0189577
cg05673882	-0.00659584	-0.00733105	0.043182	0.00452073	0.878618	0.105121
cg19372602	0.0283133	-0.000603526	0.0350941	0.0056417	0.419874	0.914825
cg16276850	1.58366e-05	-0.00089951	0.0202497	0.00348851	0.999376	0.796565
cg26764244	0.112124	-0.00443159	0.0573879	0.00551771	0.0508965	0.422031
cg12758082	-0.0180497	-0.00121217	0.0177726	0.00266833	0.309937	0.649703
cg15892280	-0.0132093	5.07598e-05	0.0165245	0.00249823	0.424159	0.983793
cg23090529	0.0126709	-0.00303497	0.0556273	0.00721036	0.819839	0.673886
cg04039397	-0.0870041	0.000344842	0.0603053	0.008215	0.149252	0.966524
cg00116430	0.0542963	-0.00135138	0.0397182	0.00366059	0.171806	0.712062
cg09109520	0.0148429	0.00153438	0.0429623	0.00380351	0.729774	0.686712
cg26337070	-0.0930245	-0.00744136	0.0601051	0.0052464	0.121898	0.156325
cg10807309	0.0114975	-0.0011406	0.0349583	0.00340488	0.742279	0.737687
cg12803068	-0.154979	0.000112675	0.0894912	0.00557505	0.0835286	0.983878
cg12423733	0.112924	-0.00147408	0.0650413	0.00901341	0.0826805	0.870116
cg23351584	0.00193508	0.00481913	0.0315869	0.00540636	0.951155	0.372891
cg27598208	-0.0234025	0.00285009	0.0309692	0.0043338	0.449933	0.510884
cg16834726	0.0290516	-0.00417397	0.0230797	0.00406959	0.208241	0.305255
cg25212453	0.0828798	0.00105802	0.0571199	0.00815467	0.146935	0.896789
cg22403782	-0.0241344	-0.00104764	0.0561637	0.00436508	0.667464	0.810365
cg04521626	0.00793451	-0.00121149	0.0194161	0.00288113	0.682833	0.674199
cg00808648	0.00375107	0.00264143	0.0210988	0.00392176	0.858905	0.500731
cg15159987	-0.0376733	0.00440553	0.0218084	0.00310357	0.0842303	0.155992
cg26282236	-0.047174	0.00283865	0.0385079	0.00318508	0.220744	0.372968
cg02743070	-0.0258354	0.00730362	0.0203345	0.00338067	0.204022	0.0309228
cg23480021	0.0822456	-0.0129604	0.109474	0.0103048	0.452594	0.208729
cg19427338	0.00542848	0.00216785	0.0346627	0.00440485	0.87557	0.622697
cg15600935	0.0539434	-0.00414816	0.0423624	0.00750243	0.203002	0.580421
cg04039799	-0.0148054	-0.00333193	0.0227928	0.0032944	0.516043	0.312018
cg11263997	0.0519653	-0.00275739	0.0454502	0.006207	0.25303	0.656943
cg02985540	-0.0380599	0.00200955	0.0279941	0.00307365	0.174142	0.513356
cg07123182	0.0171367	-0.00472372	0.0720845	0.011255	0.812112	0.674775
cg23781467	0.0165637	-0.00493908	0.0260639	0.00301863	0.525179	0.102041
cg00687135	0.0104978	0.00816524	0.049228	0.00660134	0.831154	0.216346
cg03188382	-0.0206174	-0.00242506	0.0289827	0.00306427	0.476952	0.428864
cg07626482	-0.00194913	-0.0064743	0.0251444	0.00265508	0.938221	0.0148858
cg08396193	-0.0208063	0.0013804	0.0401562	0.00605935	0.604417	0.819827
cg01901332	0.00129032	0.00371153	0.033779	0.0039229	0.969533	0.344266
cg07967717	0.0156496	-0.00246682	0.0263218	0.00332385	0.552216	0.458128
cg01062937	-0.000967008	-0.00246683	0.0177312	0.00241617	0.956513	0.307463
cg02657160	0.00177983	0.00753274	0.0356813	0.00621337	0.960221	0.225603
cg12101586	-0.0530787	-0.0126538	0.0674503	0.00611176	0.431439	0.0386115
cg06648759	0.0345835	0.00274139	0.0275643	0.00349967	0.20976	0.433578
cg27286011	0.0206258	0.00848702	0.0329128	0.0035306	0.530952	0.0163628
cg17551891	0.0188086	-0.00184055	0.0563644	0.00531379	0.738653	0.729121
cg02547394	-0.0189106	0.00488865	0.0431879	0.00726347	0.661521	0.501041
cg05951221	-0.0690214	-0.00179395	0.0421093	0.00387121	0.101389	0.64315
cg04704634	-0.000785497	0.0032719	0.0273565	0.00404169	0.977096	0.418355
cg03450842	0.0188475	0.000464618	0.0231128	0.00299843	0.41491	0.876882
cg11436113	0.00844568	-0.00190883	0.0239104	0.00352891	0.723957	0.588661
cg08266095	-0.0527719	-0.000104706	0.0444416	0.00441457	0.235222	0.981081
cg15417641	-0.00661973	0.00164328	0.0699679	0.00641857	0.924636	0.797977
cg09701700	0.0207499	-0.00325557	0.0320813	0.00304809	0.51786	0.285691
cg02375409	0.0161793	0.00101561	0.0371785	0.00373625	0.66349	0.785801
cg05906166	-0.0363107	-0.00140823	0.068036	0.00497517	0.59363	0.777183
cg03194226	-0.0443253	0.00182943	0.0319344	0.0051098	0.165267	0.720383
cg26361535	-0.0435657	-0.000309845	0.0448991	0.0039944	0.332044	0.938182
cg13543915	0.00449067	0.00366894	0.0206114	0.00294249	0.82755	0.212665
cg10592592	0.0168792	-0.00134575	0.0359643	0.00344856	0.638895	0.696427
cg27178191	0.0225612	-0.00423676	0.0180274	0.00250504	0.210898	0.0910213
cg11071448	-0.0349981	0.00157173	0.0304671	0.00523963	0.250786	0.764249
cg01692968	-0.0626814	0.00853061	0.0402601	0.00597022	0.119639	0.153284
cg00533649	-0.013703	-0.000447514	0.0289857	0.00236866	0.636458	0.850177
cg09762515	0.0313805	0.0034203	0.0310158	0.00507087	0.311759	0.500114
cg04324758	-0.0761698	0.0240967	0.0664532	0.00983366	0.251831	0.0143989
cg24090911	0.0299438	6.94526e-05	0.0410746	0.00719726	0.466064	0.992302
cg07178945	-0.0583973	0.000631442	0.0358622	0.00302111	0.103647	0.834473
cg24230340	0.0457157	0.00629432	0.0440256	0.00402816	0.299247	0.118399
cg18961281	0.00369031	-0.000385438	0.0230547	0.00378	0.872841	0.918798
cg25305703	0.00358354	0.0103316	0.0492247	0.00613771	0.941973	0.0925589
cg08595501	0.0244676	-0.00689994	0.051569	0.00917761	0.635212	0.452292
cg10919522	0.00794824	-0.0055753	0.0351728	0.00530299	0.82124	0.293293
cg26703534	0.00236816	-0.000206635	0.0219536	0.00299691	0.914109	0.945041
cg00893603	0.0249928	-0.00323608	0.0552152	0.00486549	0.650867	0.506099
cg23126342	0.080563	0.0142849	0.0556492	0.00625979	0.147879	0.0226501
cg01127300	0.0436419	-0.00764048	0.0392975	0.00290322	0.26694	0.00859611
cg20483374	-0.0142901	0.00114202	0.0205015	0.00326871	0.485857	0.726864
cg21611682	-0.00650786	0.00207086	0.0216346	0.00261758	0.763595	0.429008
cg19719391	-0.0107614	0.0025757	0.0280218	0.003671	0.700992	0.483035
cg00378510	-0.112613	0.00994102	0.0707442	0.00492484	0.111638	0.0437407
cg26540191	-0.040409	-0.00103666	0.0715031	0.0102696	0.572045	0.919613
cg03636183	-0.0158482	-0.000913615	0.038635	0.00372349	0.68171	0.806213
cg22851561	-0.0267203	0.00151816	0.0249317	0.00426628	0.283944	0.72201
cg03220447	-0.000293954	-0.00296727	0.0230731	0.0036716	0.989836	0.419142
cg27332104	0.00574392	-0.00372028	0.0274707	0.00388227	0.834397	0.33811
cg08038054	-0.0454883	0.00491296	0.0402966	0.00549793	0.259099	0.3717
cg12876356	0.0189171	-0.00979762	0.0620483	0.00574763	0.760499	0.0885051
cg25013095	0.0201406	0.00935488	0.0632571	0.012003	0.750213	0.435898
cg13787850	0.0414517	-0.00420629	0.0371061	0.00423863	0.264095	0.321202
cg07090714	-0.0112704	-0.0124715	0.0360237	0.00379274	0.754425	0.00103551
cg09247392	-0.00945566	0.00592025	0.0222281	0.0035883	0.670589	0.0992072
cg00295485	0.0354247	-0.00521424	0.0316451	0.00424428	0.263086	0.219467
cg12303084	0.083636	-0.00368268	0.030917	0.00321944	0.00689556	0.252884
cg24838345	0.0448634	-0.0162569	0.0554989	0.00900775	0.418963	0.0713405
cg00968616	0.00115983	0.000328749	0.0208392	0.00313971	0.955621	0.916625
cg15059804	0.0136366	0.000457599	0.0446965	0.00376325	0.760336	0.903237
cg19838043	-0.00108223	-0.000772789	0.0309375	0.00324207	0.972099	0.811637
cg16219322	-0.00896259	-0.00395959	0.0277965	0.00514545	0.747149	0.441716
cg23230929	0.0191706	0.001746	0.0241685	0.00257903	0.427766	0.498527
cg07954423	-0.00726081	-0.00369068	0.039547	0.00523125	0.854346	0.480622
cg05329352	-0.0198127	-0.00573503	0.0414747	0.00361516	0.632927	0.112896
cg13074055	0.00864866	-0.0024397	0.0749534	0.00948741	0.908151	0.797105
cg02556928	-0.0688168	0.00243421	0.044766	0.00448538	0.12442	0.58743
cg21446172	-0.0412484	-0.0010299	0.0282268	0.0037577	0.144085	0.784069
cg16116321	-0.0204943	-0.00519152	0.0312232	0.00294292	0.511671	0.077956
cg16178855	0.00603539	0.0009754	0.0218305	0.00286703	0.782219	0.733751
cg03004371	0.0251128	0.0063146	0.0531453	0.00463756	0.636614	0.173556
cg09935388	-0.0361417	-0.00296483	0.0618415	0.0058079	0.559017	0.609801
cg19940644	0.00812622	-0.00716114	0.0457327	0.00472787	0.858988	0.130102
cg10691866	0.0163227	-0.00241672	0.044828	0.00368522	0.71582	0.512077
cg27312979	0.108773	-0.0029327	0.0591224	0.00436834	0.0659963	0.502115
cg11430077	-0.0387045	-0.000432791	0.0532994	0.00652276	0.467824	0.947109
cg12126344	0.0036058	0.00529099	0.0264398	0.00439194	0.891534	0.22855
cg10062919	0.0141298	-0.00486594	0.015725	0.00211966	0.369	0.0218563
cg09465703	0.00298884	-0.0106741	0.0734023	0.00769535	0.967525	0.165656
cg26703507	0.0487835	0.002483	0.0359641	0.00493338	0.175107	0.614834
cg12474798	0.0402877	0.00279176	0.0525566	0.00429004	0.443464	0.515322
cg01272202	0.00473888	0.00668294	0.0289224	0.00410523	0.869867	0.103789
cg06819357	-0.0194382	0.00303942	0.0344835	0.00381562	0.573034	0.425846
cg07381806	-0.0180101	0.00460373	0.0564092	0.00868542	0.749548	0.59617
cg24497361	0.0240895	-0.00220756	0.0248676	0.00295499	0.332817	0.455163
cg08757670	-0.00148694	0.00109619	0.0224704	0.00390012	0.947245	0.778704
cg26669717	0.0216191	-0.00361854	0.0208712	0.00299211	0.3004	0.226748
cg15542713	0.00602182	0.00364248	0.0647643	0.00623167	0.92593	0.558979
cg01218206	-0.0339734	-0.000140674	0.0333809	0.00559713	0.308901	0.979953
cg01015663	-0.030878	0.000432854	0.0276474	0.00380803	0.26419	0.909518
cg22100563	-0.0359281	-0.000732576	0.035449	0.00557182	0.310923	0.895417
cg24996979	-0.034629	0.00332388	0.0255514	0.00382578	0.175473	0.38511
cg22635676	0.00818603	0.00377227	0.176801	0.0128382	0.963077	0.768935
cg25197194	0.00311644	-0.000400679	0.0375061	0.00442793	0.933788	0.927913
cg16062877	-0.0169918	0.00595807	0.0181177	0.00298981	0.348416	0.0464952
cg00210249	0.0339094	-0.00247246	0.0434163	0.00483164	0.43489	0.608933
cg27467282	-0.00446331	0.0016917	0.0365792	0.00525492	0.902897	0.74756
cg05677062	-0.0442277	0.00327817	0.0375206	0.004047	0.238656	0.418075
cg15498134	0.0781609	-0.0104815	0.0462182	0.00737106	0.0909489	0.155278
cg09084391	-0.0260751	-0.00152537	0.0694687	0.00833539	0.707443	0.854827
cg03254067	-0.0101868	-0.000181989	0.0303862	0.00508875	0.737469	0.971477
cg11094248	0.00687358	-0.00181071	0.0198569	0.00346693	0.729255	0.601566
cg15963463	0.00293163	-0.000687384	0.0257398	0.00378947	0.909332	0.856088
cg01763916	0.0335492	-0.00222708	0.0237066	0.00386557	0.157148	0.564626
cg06321596	-0.0123419	0.00284348	0.0386961	0.00486649	0.749804	0.559121
cg12513616	-0.0042898	-0.00349472	0.0264524	0.00296921	0.87119	0.239422
cg11701312	-0.000645788	-0.00215289	0.0186685	0.00225574	0.972409	0.340057
cg04858631	-0.0146379	0.0122536	0.0365816	0.00646372	0.689084	0.0582133
cg11390978	-0.0210353	0.00700924	0.0644756	0.0117768	0.744261	0.551829
cg27262054	0.00929818	-0.00378627	0.0358532	0.00371905	0.795404	0.308834
cg24688690	0.000540443	0.00190483	0.0159742	0.00253254	0.973014	0.452102
cg06369322	-0.0129692	-0.000461053	0.0198243	0.00290995	0.51305	0.874134
cg04673446	-0.0139213	-0.00192761	0.0221479	0.00401055	0.529693	0.630858
cg19325791	-0.0232705	0.0084201	0.0334766	0.00554063	0.487043	0.128831
cg19744173	-0.00123247	-0.00287815	0.0239521	0.00329847	0.958967	0.383058
cg07029024	0.0495553	-0.00697597	0.0352667	0.00479196	0.160128	0.145702
cg25317941	0.0167502	0.000800463	0.0214512	0.00385688	0.434964	0.83562
cg25727671	0.0339854	0.00175799	0.0548722	0.00907973	0.535742	0.846506
cg26850624	0.102866	0.000975353	0.0613697	0.004197	0.09392	0.81627
cg13518625	0.0042031	-0.000142498	0.0856466	0.013004	0.960864	0.991259
cg17566560	0.00652284	-0.00616435	0.0271741	0.00515614	0.81032	0.232095
cg16611234	0.0881191	-0.00672747	0.0480578	0.00537648	0.0668817	0.211058
cg16151538	-0.0225807	0.00473446	0.0254295	0.00455754	0.374641	0.299082
cg04368724	-0.000194603	0.00101967	0.0433858	0.0048972	0.996422	0.835094
cg14264316	-0.018015	0.00244375	0.0289633	0.00530128	0.534003	0.644895
cg26151910	0.0677473	-0.00301725	0.0396157	0.00641145	0.0873777	0.638003
cg26486070	-0.0132251	0.00329498	0.0393988	0.00378267	0.73716	0.383878
cg14254999	-0.034051	0.000106534	0.0463147	0.00847517	0.462281	0.989973
cg00699986	0.0398589	-0.000111699	0.0281822	0.00468551	0.157397	0.980985
cg06688763	-0.0246612	-0.00835124	0.0769946	0.00604002	0.748786	0.16701
cg15700587	-0.0155109	-0.00102985	0.0299042	0.0054789	0.604026	0.850932
cg03489965	-0.00202489	-0.00249371	0.0409628	0.00461349	0.96058	0.588927
cg07413467	-0.0435441	0.000834033	0.0428979	0.00405561	0.310227	0.837097
cg01731783	-0.00152621	0.00259178	0.0157327	0.00267483	0.922728	0.332749
cg06635952	0.0339704	0.00302737	0.0256355	0.00337077	0.185282	0.369286
cg17087741	0.0395419	-0.00478475	0.0692609	0.0115554	0.568115	0.678893
cg20438687	-0.021812	0.00041614	0.0336061	0.00383361	0.516391	0.913576
cg07986378	0.0377497	0.00875094	0.0432595	0.00748448	0.382951	0.242537
cg22356527	0.0187573	-0.00812461	0.0310046	0.00561514	0.545243	0.148165
cg01839993	0.0103754	0.000206483	0.0308279	0.00293622	0.736493	0.943948
cg13020466	-0.030169	0.00623619	0.0272696	0.00459679	0.268697	0.175129
cg01951879	-0.019975	0.00501714	0.0437742	0.00598987	0.648209	0.402408
cg24931658	0.00430075	0.0026994	0.0258805	0.00316457	0.868036	0.393813
cg16398761	-0.0824792	-0.00554635	0.0626806	0.0105041	0.188346	0.597579
cg26196424	0.0320749	-0.000647146	0.0369795	0.00548562	0.385836	0.906109
cg14563949	0.00612699	0.00234518	0.0198295	0.00310821	0.757362	0.450682
cg09554443	0.0266302	0.00450179	0.0309967	0.00299163	0.390396	0.132621
cg07069636	-0.0157365	0.000269402	0.021601	0.00258429	0.466396	0.91699
cg09560590	0.0342979	-0.000878155	0.0339528	0.00351222	0.31256	0.802605
cg04907244	0.0377484	0.00131258	0.0562319	0.00533958	0.502127	0.805861
cg23576855	0.108983	0.00333996	0.148126	0.00610676	0.462014	0.584523
cg16519923	-0.00281327	0.000462182	0.0256598	0.00421315	0.912706	0.912665
cg04806562	-0.0110147	0.000691712	0.018656	0.00276633	0.554976	0.80259
cg12619504	-0.00706514	0.00518587	0.0331791	0.00283612	0.831402	0.0677018
cg09848445	-0.0774098	0.022893	0.0631015	0.0113904	0.220032	0.0446547
cg26477856	-0.00218062	0.000279588	0.01809	0.00288874	0.904064	0.922912
cg24556382	-0.0329511	0.000885504	0.046872	0.00530342	0.482147	0.867421
cg23401251	-0.00941895	-0.00210196	0.0275368	0.00425858	0.732346	0.621684
cg19859270	-0.0373666	0.00314052	0.0411449	0.00754212	0.363873	0.677187
cg19459791	-0.00670891	-0.00181716	0.0376703	0.00463157	0.858668	0.69487
cg11231349	0.0360016	-0.00148144	0.0533764	0.00751176	0.500078	0.84369
cg03399898	-0.213893	0.00758489	0.064194	0.00518992	0.000882895	0.144134
cg16255816	0.00944437	-0.00373059	0.0308433	0.00365131	0.759484	0.307112
cg10874644	0.0194483	0.00196615	0.0609881	0.00783482	0.749846	0.801892
cg17668731	0.0250459	-0.00251841	0.0192184	0.00339321	0.19262	0.458106
cg14435720	0.00167137	0.0187509	0.0809495	0.0124119	0.983529	0.131104
cg09658497	-0.212806	0.0027462	0.0953684	0.0079982	0.0257966	0.73139
cg06885459	0.00329147	0.00182125	0.0353713	0.00334441	0.925871	0.586146
cg01207684	-0.0829158	-0.00527607	0.0602734	0.00745599	0.169089	0.479304
cg08606254	-0.0108631	0.00726537	0.0520398	0.00751188	0.834666	0.333633
cg00336149	0.0187877	-0.00606427	0.0490104	0.00338984	0.701523	0.073858
cg21473814	-0.0068318	0.0051914	0.0359125	0.00414322	0.849147	0.210437
cg18146737	-0.0566429	-0.000456658	0.170683	0.0160098	0.740038	0.977249
cg02583484	0.0558961	-0.00352386	0.0291616	0.00273852	0.0554449	0.198406
cg20357806	-0.0198954	0.00440586	0.0329697	0.00526155	0.546272	0.40254
cg06972908	-0.0123915	0.00245947	0.0258952	0.00451306	0.632319	0.585871
cg04701628	0.000735579	-0.00208914	0.0190947	0.00331137	0.969274	0.528218
cg26718213	0.0109728	-0.00358607	0.0831437	0.00513069	0.895023	0.484718
cg16201146	0.0120928	-0.000986633	0.0290906	0.00448403	0.677674	0.82588
cg25748521	0.0245616	-0.00162021	0.0236874	0.00395277	0.299885	0.681953
cg13193840	-0.0609789	-0.00103224	0.062456	0.0116873	0.328984	0.929635
cg20684110	0.0303289	0.00302384	0.0455422	0.00423862	0.505539	0.475731
cg15806304	0.00296186	0.00104086	0.0257331	0.00337634	0.908378	0.757919
cg26844633	0.0112537	-0.00267915	0.0469175	0.00751063	0.81046	0.721363
cg03348792	-0.0296307	0.00545707	0.0297604	0.00434442	0.319537	0.209301
cg08035323	0.108355	-0.0156278	0.0485343	0.00437292	0.0257179	0.000364922
cg21188533	0.026487	-0.00960165	0.0852552	0.00657968	0.756087	0.144728
cg23441210	0.00771425	-0.00738227	0.0288153	0.00531908	0.788942	0.165408
cg11557553	0.00306937	0.00276946	0.0225187	0.0039973	0.891592	0.488539
cg13428066	0.000746172	-0.00253268	0.0244354	0.00388961	0.975642	0.515075
cg13937905	-0.152672	0.00795598	0.0573942	0.00685884	0.00788214	0.246284
cg22407942	0.0244193	-0.000713937	0.0486697	0.00416445	0.615925	0.863908
cg20295214	0.00147177	0.00899985	0.0348396	0.00587115	0.966308	0.125545
cg26364091	0.00023985	-0.000477237	0.0233203	0.00306806	0.991795	0.876412
cg26963277	-0.0342015	0.00532082	0.0599274	0.00682171	0.568265	0.435543
cg10678215	0.0258907	0.00779042	0.0395371	0.00603626	0.512635	0.19707
cg08972170	-0.0197533	0.0132497	0.038808	0.00533329	0.610807	0.0131053
cg10965178	-0.0480154	0.00159843	0.0288659	0.00351782	0.0964017	0.649631
cg01481251	-0.00612904	-0.00195183	0.0552067	0.00854434	0.911611	0.819344
cg25949550	0.00746095	-0.00115073	0.0351666	0.00412728	0.832006	0.780434
cg14580211	-0.0452286	0.00474392	0.0314396	0.0039804	0.150431	0.233551
cg19816811	0.0012897	0.00309496	0.0453173	0.00333311	0.9773	0.353297
cg24698211	0.00281991	0.00189047	0.0324859	0.00368055	0.930837	0.607593
cg25921609	-0.0451109	-0.00125522	0.0369402	0.00494539	0.22216	0.799678
cg20305005	0.0133005	-0.000448535	0.0330811	0.00453839	0.687684	0.921287
cg10592478	-0.0529286	0.00332081	0.0452724	0.00788835	0.242472	0.673843
cg09975715	-0.0134246	-0.000949542	0.035636	0.00600459	0.706419	0.874374
cg21869609	-0.0345134	0.00553263	0.0959599	0.00542961	0.719152	0.308406
cg23842572	0.0467139	-0.00374088	0.0283943	0.00434047	0.100074	0.388923
cg01744331	-0.0885592	0.00269267	0.0732829	0.0114587	0.226999	0.814253
cg16391678	0.0231673	-0.00145724	0.0238182	0.00381382	0.330818	0.702456
cg08666707	-0.0136462	0.0051067	0.020709	0.00328817	0.509994	0.120655
cg22876908	0.0230046	-0.00555193	0.0203161	0.00299461	0.257626	0.0639838
cg23594345	-0.022657	-0.00107846	0.0560832	0.00571056	0.686272	0.850238
cg25292882	0.00248599	0.0049161	0.0441525	0.00783588	0.955104	0.530518
cg14817490	0.00621385	0.00190001	0.0419572	0.00436406	0.882282	0.663362
cg26995224	-0.0208413	-0.000679848	0.0542821	0.00334957	0.701077	0.839193
cg19089201	-0.197907	-0.00790588	0.107438	0.00900798	0.0656592	0.380295
cg02917867	0.00925156	-0.00354367	0.0251834	0.0033149	0.713385	0.285265
cg10403394	0.0444836	0.00449471	0.0706269	0.00519434	0.528897	0.387031
cg13038618	-0.0153324	0.00808131	0.0348931	0.00526824	0.660407	0.125281
cg11225089	-0.0151213	0.00299081	0.0251409	0.00407766	0.547591	0.463408
cg10827488	0.00214363	-0.00103481	0.0261882	0.00391949	0.93477	0.79181
cg03660377	0.0233188	0.00203695	0.0515707	0.00768103	0.65119	0.790904
cg10255761	-0.00640839	-0.00603059	0.0276984	0.00307471	0.81706	0.0500541
cg01097768	-0.0409735	0.00685834	0.0256666	0.00478728	0.11053	0.152209
cg11666770	-0.040292	-0.00335214	0.113959	0.00665391	0.723716	0.614498
cg17333042	-0.0175874	0.00146799	0.022254	0.00258516	0.429454	0.570233
cg09469355	-0.0192416	-0.00358959	0.0243186	0.00288565	0.428912	0.213743
cg18900812	0.00421118	0.000319424	0.0500586	0.00863603	0.932964	0.970501
cg18295744	-0.0157812	0.00266755	0.021771	0.00370456	0.468602	0.47161
cg02228160	0.0267429	0.00388233	0.0320784	0.00339585	0.404582	0.253152
cg26788216	-0.0114703	-0.00256175	0.0337973	0.00450717	0.734356	0.569882
cg11207515	0.0104705	-0.00418612	0.051276	0.00608446	0.838221	0.491575
cg20066188	0.0676074	-0.00609037	0.048987	0.00323131	0.167765	0.0596812
cg01294327	-0.0620259	0.00979093	0.0697444	0.00426192	0.373975	0.0217606
cg10750182	-0.0223449	0.0011186	0.01635	0.00257766	0.171869	0.664391
cg11145461	-0.0191198	0.00330642	0.0402153	0.00669513	0.634519	0.621492
cg16880946	-9.33229e-05	-0.00414804	0.0386848	0.00272265	0.998076	0.12787
cg00871371	-0.00991632	-0.00503337	0.0239005	0.00330909	0.678259	0.128487
cg08899667	-0.0114779	-0.00113499	0.0273909	0.00299412	0.675239	0.704699
cg11197630	-0.0161856	0.00255325	0.0504236	0.00923154	0.748243	0.782147
cg26878655	-0.0171379	0.00556614	0.0296493	0.00545835	0.5633	0.308038
cg08386009	0.0101188	-0.000688304	0.0173968	0.00285734	0.560862	0.80968
cg09022230	-0.0289163	0.00182848	0.033222	0.00374262	0.384203	0.62524
cg22937882	-0.0106389	0.00435783	0.0277688	0.00470548	0.70166	0.354558
cg03611151	0.0299256	-0.00272041	0.0314795	0.00453393	0.341898	0.548603
cg15636519	-0.0179732	-0.00805946	0.04542	0.00772739	0.692354	0.297157
cg13582060	-0.00242627	0.0045689	0.0615752	0.00845512	0.968573	0.589036
cg08947774	0.0544648	-0.00948107	0.0295151	0.00440298	0.0651269	0.0314761
cg00324097	-0.0107602	0.00241586	0.0178802	0.00263934	0.547375	0.360193
cg00911794	0.00304076	0.00975729	0.0473057	0.006526	0.948754	0.135125
cg12806681	0.0121213	0.00664608	0.0473741	0.00659168	0.798081	0.313524
cg20873136	0.0503037	-0.00406441	0.0254421	0.00424302	0.0481366	0.33829
cg14165660	0.00944805	0.00262525	0.0294434	0.00428392	0.748326	0.540105
cg05517711	-0.0101427	0.00237513	0.0178858	0.00262832	0.570719	0.36634
cg10179300	-0.0400149	0.0054319	0.0423169	0.00567784	0.344466	0.338906
cg06294803	0.0321522	-0.0141412	0.0473283	0.00637084	0.497	0.026615
cg06151964	-0.0028573	0.00103368	0.0193346	0.00303091	0.882528	0.733125
cg06394460	-0.0848046	0.0119842	0.0533191	0.00780952	0.111868	0.125136
cg06513247	-0.0200461	0.00248827	0.0164904	0.00259793	0.224255	0.338349
cg19406367	0.048109	0.0140034	0.0432756	0.00456722	0.266428	0.0022141
cg03415545	-0.00608805	-0.0153643	0.0553605	0.00859512	0.912442	0.074082
cg02101876	0.0275766	0.00651052	0.0507766	0.00914789	0.587112	0.47678
cg02556393	-0.0570482	-0.00663411	0.0397247	0.00494109	0.151142	0.179625
cg25421530	0.00256074	0.00335846	0.0441103	0.00676139	0.953712	0.619476
cg01435643	0.0177044	0.00141783	0.0562267	0.00507922	0.752898	0.780179
cg17814814	-0.0247111	0.004294	0.0220988	0.00336512	0.2636	0.202175
cg02013841	-0.0243838	0.0220373	0.0539928	0.0100854	0.651587	0.0290606
cg06949439	-0.0264674	-0.000690511	0.0326132	0.00336494	0.417161	0.837444
cg10520740	0.00365632	0.00366421	0.0183642	0.0028788	0.842202	0.203313
cg15482893	-0.0281437	0.0119598	0.0359719	0.00533165	0.434077	0.0250538
cg02782510	0.0150881	0.0075692	0.0317803	0.00521738	0.635	0.147085
cg14093127	-0.0233585	0.00112897	0.0486771	0.00606589	0.631378	0.852381
cg26790897	0.0156811	0.00875794	0.0303388	0.00448597	0.605302	0.0511182
cg01856529	-0.0100635	0.000705259	0.0342488	0.00571833	0.76891	0.901862
cg05529343	0.0210506	-0.000503112	0.0824188	0.00869384	0.798438	0.953861
cg02186444	0.0053876	-0.000286229	0.0256347	0.00275102	0.833561	0.91715
cg14142087	-0.0113319	0.00202667	0.0235263	0.0027656	0.630099	0.463805
cg12547807	0.00209153	-0.00486333	0.0218955	0.0027056	0.92391	0.0724893
cg10825315	0.00342412	0.00305373	0.0319514	0.00529203	0.914666	0.564011
cg19589396	0.030564	0.00576823	0.0351432	0.00429969	0.384579	0.179987
cg08118908	0.0960318	-0.00519897	0.0444823	0.00716996	0.0309632	0.468519
cg00073090	-0.00230987	-0.000975191	0.0233904	0.00303028	0.921345	0.747644
cg01513913	-0.0145437	0.000811332	0.0309686	0.00268389	0.638687	0.762475
cg23973524	0.0199351	0.000407141	0.0372092	0.00322149	0.592203	0.899449
cg13976502	-0.00763073	0.00104437	0.0204101	0.00312973	0.708536	0.738663
cg13525276	0.025714	-0.00282562	0.0419091	0.00574202	0.539571	0.622735
cg13039251	-0.0805232	0.00771275	0.051559	0.00547113	0.118527	0.158861
cg08149865	-0.0122031	-0.00100499	0.0268959	0.00299931	0.650089	0.737625
cg25953130	0.0259444	0.00507308	0.0507658	0.00635982	0.609369	0.425205
cg00501876	-0.0163861	-0.00332673	0.0215528	0.00345934	0.447166	0.336397
cg05969150	-0.00832581	-0.000263379	0.0192082	0.002285	0.66474	0.908254
cg00976097	0.119772	0.00512594	0.171361	0.0109159	0.484698	0.63873
cg23565821	0.00159919	-0.00100144	0.0280162	0.00388093	0.954486	0.796415
cg21161138	-0.000461014	0.000874335	0.0300892	0.00407398	0.987777	0.830102
cg17619755	0.00616413	0.00640041	0.0469183	0.00415677	0.895491	0.123865
cg11152412	0.0231221	-0.00572181	0.0332409	0.00563213	0.486751	0.309853
cg16936060	0.044006	-0.00281119	0.0298356	0.00374084	0.140393	0.452497
cg14712058	0.0061118	-0.00065909	0.0346152	0.00453648	0.859869	0.884507
cg24693803	-0.0039754	0.00410551	0.0306334	0.00295066	0.896762	0.164346
cg12406027	-0.0230803	0.00147244	0.0242557	0.00256051	0.341464	0.565353
cg17038235	-0.0155991	0.00226816	0.0271918	0.0032008	0.566263	0.478685
cg16503724	0.0229752	-0.000654518	0.0237952	0.00349368	0.334384	0.851421
cg26060489	-0.00812026	0.00530453	0.0214792	0.00374767	0.705424	0.15719
cg09607043	0.0182256	-0.0073814	0.0393609	0.00611768	0.643383	0.22782
cg12873476	-0.00542056	-0.0014463	0.0396423	0.00326371	0.891257	0.657735
cg00085013	-0.0227717	0.00529231	0.0243362	0.0036237	0.349524	0.144403
cg26529655	0.00319589	0.00259604	0.0230448	0.00388968	0.889714	0.504626
cg19211853	0.0302773	-0.0322133	0.122077	0.016847	0.804145	0.0560844
cg02451831	0.0119239	-0.00147716	0.0283856	0.00423924	0.674476	0.727561
cg06235438	0.0233521	-0.00366211	0.0277379	0.00494333	0.399934	0.458939
cg02775417	-0.0940155	0.0144666	0.0699004	0.0126173	0.178749	0.25177
cg20059928	-0.0275184	0.00184005	0.045795	0.00334447	0.547996	0.582292
cg10951873	0.0508861	-0.00779339	0.0339454	0.00534778	0.133997	0.145272
cg25809905	0.0969336	-0.00760067	0.0445629	0.00363159	0.0297685	0.0365536
cg16969872	-0.0118739	-0.00135148	0.0387594	0.00442254	0.759374	0.759966
cg19046189	0.0174927	-0.00230336	0.0175149	0.00266693	0.318032	0.387926
cg23667432	-0.00594764	-0.00320272	0.0206706	0.00365862	0.773575	0.381526
cg01005506	0.0135525	0.00294118	0.033435	0.00284923	0.685285	0.302137
cg14074174	0.00465739	-0.0033014	0.0219626	0.00230618	0.832085	0.152516
cg04956244	-0.0131013	0.00384293	0.0165803	0.00262775	0.429511	0.143864
cg03345925	-0.010321	0.00465558	0.0278717	0.00362725	0.711196	0.199545
cg27537125	0.0335977	-0.00997952	0.0240519	0.00356685	0.162592	0.0052208
cg20902353	0.0175894	0.00152744	0.0184709	0.00273142	0.341064	0.576116
cg13784312	-0.030772	-0.0085218	0.137512	0.0250004	0.822949	0.733259
cg11902777	0.0191693	0.00692798	0.0630984	0.0063647	0.761318	0.276577
cg21747070	0.0124414	-0.00170115	0.0357678	0.00314582	0.728009	0.588763
cg17024919	-0.0107758	-0.00328971	0.0731616	0.00532169	0.882925	0.536571
cg21566642	-0.0584597	-0.00654028	0.0538871	0.00491288	0.278149	0.183344
cg08763102	0.015324	-0.00093306	0.0223741	0.00366243	0.493475	0.798944
cg18754985	0.0460152	0.00148424	0.0484542	0.00949423	0.342371	0.875796
cg22132788	-0.235212	-0.0014523	0.126814	0.00951952	0.0638253	0.87877
cg03646329	-0.118494	0.00802567	0.0625644	0.00945965	0.0583651	0.396366
cg14120703	-0.0272297	0.0045323	0.0168563	0.00280347	0.106358	0.10619
cg02336104	-0.0313859	0.00183101	0.034612	0.00318796	0.364652	0.56583
cg04813697	0.020162	0.000182078	0.0387323	0.00456767	0.602746	0.968209
cg03519879	-0.000665936	0.000993664	0.0186627	0.0026884	0.971539	0.711734
cg27449150	0.0282994	-0.0109679	0.031735	0.00486806	0.372629	0.0244247
cg04573702	0.0095514	0.000310896	0.0234115	0.00329401	0.683332	0.92482
cg07465627	-0.00345715	-0.00171157	0.0247279	0.00395822	0.888825	0.665517
cg04970434	-0.0303707	0.00421423	0.0287255	0.00370616	0.290519	0.255712
cg04383058	0.0241009	-0.00703406	0.0301357	0.00460002	0.423945	0.12648
cg16702313	-0.0206567	0.00426335	0.0195358	0.00355532	0.29044	0.23069
cg23198793	-0.02426	-0.00105241	0.0325952	0.00440976	0.456794	0.811412
cg09578155	-0.00275088	-0.00309096	0.0158612	0.00233804	0.862326	0.186389
cg10788371	0.00701386	0.00265132	0.0313596	0.00271374	0.823052	0.328755
cg20103692	0.0133363	0.00706497	0.0378249	0.00664523	0.724434	0.287909
cg24741609	-0.0255702	-0.00262343	0.0303506	0.00314053	0.399631	0.40368
cg22539182	0.0155136	-0.000703515	0.0254746	0.00243551	0.542621	0.772737
cg12836863	0.0397721	-0.00851571	0.0253979	0.0045266	0.117485	0.0601609
cg14977938	0.0160432	0.000861786	0.0323785	0.00354407	0.620316	0.807918
cg06433467	0.0358298	-0.0120574	0.0663812	0.0078172	0.589429	0.123215
cg18991417	0.0443924	-0.0031977	0.0295974	0.00392315	0.133806	0.415174
cg05957567	0.0337644	-0.00304419	0.0227025	0.00307594	0.137106	0.322521
cg02035751	-0.0109046	0.00297541	0.0206701	0.00307535	0.597863	0.333477
cg19847577	0.0537942	0.00301805	0.0350427	0.00336657	0.124952	0.370166
cg01442064	0.0164561	0.00313011	0.0241631	0.00357988	0.495917	0.382083
cg15087369	0.0406481	0.0060976	0.033934	0.00521162	0.2311	0.242215
cg16983588	0.00596065	-0.00455592	0.0439391	0.00430066	0.892109	0.289636
cg14179389	-0.0593592	-0.00707021	0.0622041	0.00618496	0.34009	0.253199
cg04258133	-0.0383472	0.00474543	0.0407046	0.00486011	0.346273	0.329046
cg09099830	-0.0114409	-0.00604634	0.0307621	0.00296006	0.710003	0.0412927
cg24719910	0.0183898	-0.00254024	0.0468386	0.00891675	0.694631	0.775778
cg04018738	0.0173107	0.000313986	0.0746661	0.00641139	0.816691	0.960948
cg19825437	-0.0692857	-0.00214592	0.0312643	0.00369643	0.0268061	0.561653
cg09570614	0.0163725	0.00268228	0.0242995	0.00266957	0.500541	0.315199
cg24158160	0.0472762	-0.00663178	0.0275739	0.00484395	0.0865573	0.17121
cg21913886	-0.000619829	0.00171599	0.0434835	0.00498508	0.988629	0.730732
cg00835193	-0.0341213	0.000204356	0.0490879	0.00558638	0.487079	0.970825
cg23673974	0.00667715	-0.00623954	0.0228792	0.00402937	0.77043	0.121743
cg01668352	0.018502	-0.00202724	0.033824	0.00667266	0.584421	0.761318
cg11253886	-0.00895181	-0.00089357	0.0359076	0.00321036	0.80316	0.780796
cg18316974	-0.0264955	-0.016351	0.123418	0.0139271	0.830041	0.240598
cg18625627	0.0237067	-0.00811175	0.0436116	0.00610265	0.586785	0.18401
cg07063068	-0.00734212	0.000114861	0.0626026	0.0101015	0.906647	0.990929
cg26271591	-0.00377355	-0.00227154	0.0470645	0.00731024	0.936103	0.756054
cg10814005	-0.0129516	-0.00353754	0.0399189	0.00549083	0.745633	0.51952
cg24049493	0.0853654	5.88372e-05	0.0788632	0.00595496	0.279226	0.992118
cg03316752	-0.00495932	-0.000308671	0.0475719	0.00803953	0.916981	0.969379
cg05302489	0.0590129	-0.00447384	0.0474517	0.00551259	0.213792	0.41719
cg12729894	-0.0394418	0.002384	0.0242962	0.00346292	0.104661	0.491303
cg03957124	-0.00662295	0.000928673	0.021882	0.00361415	0.762171	0.797255
cg11824827	-0.0109434	-0.000249975	0.0279244	0.00340036	0.695182	0.941408
cg14089503	-0.0184478	0.00115678	0.0390534	0.00474326	0.636714	0.807364
cg19925780	0.00337583	0.0014035	0.043662	0.00623645	0.938379	0.821977
cg01017464	0.037383	0.00458587	0.0419105	0.00502525	0.372524	0.361641
cg22845855	-0.0975125	-0.00311889	0.0441921	0.00633167	0.0274518	0.622389
cg22870429	0.0480181	-0.00511917	0.0268359	0.00383973	0.0737068	0.182696
cg03109660	-0.00987923	0.00435164	0.0251775	0.00414536	0.69481	0.294023
cg17924476	0.0321199	-0.0018398	0.0440763	0.00394177	0.466273	0.640762
cg22891595	0.0020946	0.00332284	0.0245887	0.0031647	0.932123	0.293928
cg01940273	-0.0194759	-0.00266599	0.0358895	0.00370281	0.587434	0.471661
cg04716530	0.0159814	-0.00465782	0.0299734	0.00480374	0.593957	0.332422
cg11554391	-0.0292512	-0.00257934	0.0394807	0.00520418	0.458842	0.62024
cg23233742	-0.010075	-0.00341524	0.0308882	0.00326103	0.74433	0.295162
cg25648203	-0.0316888	0.00360917	0.0338155	0.00450039	0.348817	0.42272
cg14675361	-0.025714	0.0103963	0.0477247	0.00659007	0.590085	0.114909
cg23219570	0.0095552	-0.000314628	0.0311375	0.00370599	0.758976	0.932356
cg22998476	0.0458933	-0.00826531	0.027915	0.0033959	0.10034	0.0150759
cg27405731	0.00899753	0.000806292	0.0337901	0.00426395	0.790054	0.850048
cg11690578	-0.0753975	0.00738826	0.0362959	0.00506859	0.0378975	0.145178
cg20244340	0.0140578	-0.00394013	0.0417799	0.00320503	0.736562	0.219162

## Sheet: all results TSQL7
CpG site	cross-sectional coefficient TSQL 7	longitudinal coefficient TSQL 7	cross-sectional coefficient SE TSQL 7	longitudinal coefficient SE TSQL 7	cross-sectional coefficient pvalue TSQL 7	longitudinal coefficient pvalue TSQL 7
cg05575921	-0.0806984	-0.000597866	0.0936013	0.01059	0.388722	0.954988
cg23079012	0.0781043	0.00192084	0.0739969	0.00984553	0.291323	0.845348
cg06126421	0.0332108	-0.00499426	0.0511801	0.00450148	0.516498	0.267433
cg25512107	-0.0375882	0.00753729	0.0516193	0.00964278	0.466569	0.434562
cg07251887	-0.00388875	-0.00199042	0.0245718	0.00319766	0.874268	0.533749
cg14753356	0.00457789	-0.00702231	0.0268523	0.00355921	0.864647	0.0487083
cg25189904	-0.0729923	-0.000958798	0.0579544	0.00488839	0.208048	0.844533
cg15022400	-0.0306642	0.00155864	0.0308786	0.00381427	0.320812	0.682876
cg15187398	-0.00254464	-0.00514156	0.0397707	0.00335434	0.948992	0.125569
cg05875421	-0.0236632	0.0069091	0.0337785	0.00560289	0.48366	0.217747
cg13184736	-0.051968	0.00102817	0.0792698	0.00667588	0.512189	0.877625
cg23161492	0.0184102	-0.00457653	0.0457716	0.0036635	0.687579	0.21181
cg09338136	-0.08455	0.00117551	0.0329444	0.00390367	0.0103534	0.763365
cg12147622	0.0249814	-0.0132544	0.0320025	0.0043804	0.435125	0.00252881
cg24540678	-0.00204565	0.00187545	0.0291003	0.00373015	0.943965	0.615203
cg07306253	-0.017285	-0.000535398	0.0223771	0.00384584	0.439929	0.889302
cg15474579	-0.0147176	0.00149694	0.0285415	0.00350547	0.606156	0.669429
cg13399816	-0.0540121	-0.00177687	0.040665	0.00340044	0.184302	0.601385
cg07202214	0.00457947	-0.00634327	0.0315066	0.00359549	0.884452	0.0779336
cg10380221	0.0113538	-0.00482909	0.0350306	0.00374546	0.745893	0.197524
cg25469474	0.0207026	0.0290757	0.0735338	0.0121112	0.778323	0.016501
cg23916896	-0.0860409	-0.00187516	0.0662527	0.00832012	0.194213	0.821722
cg04225775	-0.0336489	4.78685e-05	0.0339464	0.00387758	0.321704	0.990152
cg04180046	-0.0804385	0.00258129	0.0424272	0.0031626	0.058166	0.414541
cg01836137	0.0433555	-0.00442804	0.0294624	0.00319383	0.141323	0.165855
cg18446336	-0.00248609	-0.000307826	0.0526226	0.00403555	0.962325	0.939209
cg05194346	-0.00865555	0.00361172	0.0415926	0.00390165	0.835175	0.354782
cg02257517	0.00467951	0.00562467	0.0227503	0.0027811	0.837055	0.043336
cg19827923	0.0166576	0.00422757	0.0204326	0.0034083	0.415013	0.215059
cg26856289	0.00658832	-0.000371197	0.0289817	0.00416159	0.820191	0.92894
cg19717773	-0.0724282	-0.00323057	0.0776558	0.00540992	0.351138	0.55051
cg01439566	-0.0211305	-0.0028096	0.0225119	0.00402551	0.348009	0.485333
cg13578465	0.10364	-0.00167326	0.0597786	0.00446727	0.0831723	0.70805
cg26077378	-0.096214	0.00437384	0.0650449	0.00671403	0.139275	0.514874
cg03234777	-0.0508222	0.0104024	0.0419003	0.00523827	0.225308	0.0472596
cg03440944	0.0100475	-0.00170647	0.0307672	0.00541692	0.744024	0.752793
cg03274391	-0.0279235	0.00624479	0.0973767	0.00661262	0.774338	0.345154
cg09717146	-0.00996425	0.002133	0.0286929	0.00485319	0.728417	0.660368
cg08709672	0.0377328	0.000968238	0.0281124	0.00294355	0.179707	0.742258
cg19713851	0.0996134	-0.0166937	0.0786744	0.00625244	0.205653	0.00768129
cg11621113	0.00345959	-0.00545821	0.0276234	0.0033509	0.900346	0.103583
cg24859433	0.0212093	-0.000633378	0.0355047	0.00507094	0.550328	0.90062
cg25560398	-0.00930089	0.00237346	0.0243972	0.00433104	0.703067	0.583777
cg04885881	0.00606696	-0.00509875	0.0375525	0.00380511	0.871672	0.180491
cg14624207	0.0235493	-0.003469	0.0213939	0.00308243	0.271131	0.260626
cg03547355	-0.0155298	-0.0021051	0.0237006	0.00344299	0.512377	0.54103
cg16815882	-0.0209826	0.005035	0.0216936	0.00346404	0.333535	0.146328
cg03707168	-0.0249743	-0.00410916	0.033405	0.00432575	0.454779	0.342325
cg21121843	0.0412269	-0.0137723	0.0454264	0.00548157	0.364233	0.0121094
cg22117188	0.0243774	-0.00229603	0.0167485	0.00285986	0.145661	0.42221
cg02532700	0.0745723	-0.0087886	0.0462903	0.00444144	0.107382	0.0480554
cg26242531	-0.00446083	-0.00360906	0.0242203	0.00308328	0.853894	0.242006
cg19888787	-0.0399451	-0.00308842	0.0694665	0.0127946	0.565324	0.809294
cg24173182	0.0490241	0.00277281	0.0318048	0.0041012	0.123385	0.499104
cg20810975	-0.0199493	-0.000567156	0.0185078	0.00315102	0.281192	0.857188
cg18503679	-0.488487	-0.0124117	0.251602	0.0339926	0.0523383	0.715075
cg16556677	-0.0199911	-0.00445935	0.0297303	0.00422404	0.501395	0.291303
cg16145216	0.0678934	0.000122206	0.0455888	0.00348682	0.136629	0.972047
cg21949830	0.0631604	-0.000590194	0.0471494	0.00691982	0.180525	0.932044
cg11229399	0.0270702	-0.00326076	0.0425996	0.00478361	0.525213	0.49558
cg26701785	0.170186	-0.0108016	0.0869238	0.00717223	0.0504273	0.132307
cg10841124	0.00376969	0.00410624	0.0445143	0.00632986	0.93252	0.516642
cg19798735	-0.0667559	0.00603544	0.0463405	0.00873232	0.149833	0.489587
cg18404811	-0.0282834	0.00759014	0.0266597	0.00409302	0.288849	0.0639079
cg00871610	0.0383747	0.00149972	0.0314568	0.00395545	0.222648	0.704636
cg01899089	-0.00275184	-0.00746782	0.0274261	0.00350346	0.920088	0.03323
cg19572487	-0.00369051	-0.00542412	0.0350921	0.00493959	0.916254	0.27237
cg09716613	0.111324	-0.00810004	0.0344441	0.00423276	0.00125063	0.0558861
cg18758622	-0.00202094	-0.00122829	0.0199615	0.00292878	0.919368	0.675005
cg11730703	0.0574112	-0.0056459	0.0526458	0.00482933	0.27565	0.242585
cg08375941	-0.0167809	0.00661167	0.055814	0.0109471	0.7637	0.545921
cg13418576	0.00017837	0.00852712	0.0350211	0.00535901	0.995937	0.111812
cg05284742	0.00456911	0.00215116	0.0213278	0.00335476	0.830385	0.521491
cg03329539	0.0199912	-0.00676676	0.0306797	0.00412434	0.514727	0.101107
cg13185177	0.00290657	0.00196611	0.0386793	0.00476694	0.940107	0.680081
cg09197783	-0.00747637	0.00111322	0.0271046	0.0040563	0.782702	0.783789
cg27310319	0.0249511	-0.00362819	0.0352865	0.00591941	0.479574	0.54003
cg10420527	0.00604163	0.00237753	0.0184063	0.0022819	0.742769	0.297649
cg07180646	-0.00805761	-0.00687475	0.0376469	0.00296572	0.830552	0.0205999
cg09662411	-0.0222567	0.00446267	0.0464849	0.00527902	0.632144	0.398065
cg04551776	-0.0098866	0.0107205	0.0295812	0.00449023	0.738246	0.0171041
cg10251229	0.0162406	-0.00367888	0.0246527	0.0035845	0.510112	0.304931
cg18092474	-0.0498858	-0.019393	0.0626361	0.00512195	0.425899	0.000159883
cg13247990	0.0216297	0.000338337	0.0202103	0.00328896	0.284625	0.918082
cg01832549	-0.0357683	0.000923169	0.0320793	0.00278827	0.265023	0.74063
cg08884752	0.0603987	0.00276356	0.0275366	0.00381362	0.0283913	0.468794
cg19713429	0.00408086	-0.00506963	0.0355546	0.00375343	0.908635	0.177039
cg27241845	0.0228725	-0.00784243	0.0335724	0.00399484	0.495775	0.0498435
cg02385153	0.0762698	-0.00618266	0.0370479	0.00657443	0.0396297	0.347184
cg11660018	0.0170806	-0.0104464	0.0289293	0.00267125	0.554989	9.68435e-05
cg21486510	-0.0152531	-0.000880086	0.0218655	0.00339215	0.48551	0.795332
cg16047567	0.00332277	-0.00244695	0.0369776	0.00347805	0.928411	0.481846
cg00310412	0.0277232	-0.00480455	0.0258221	0.0023562	0.283154	0.041643
cg05508862	-0.000160657	0.000655307	0.0220098	0.00236084	0.994177	0.781384
cg17372101	0.0392228	0.000694325	0.0343603	0.00394141	0.253807	0.860195
cg19956914	-0.0234266	-0.000752439	0.0471548	0.0031872	0.619404	0.813406
cg06644428	0.00820436	0.00248579	0.0822084	0.011059	0.920513	0.822189
cg01882991	-0.0264988	-0.00587082	0.0305424	0.00344785	0.385727	0.0888559
cg15693572	-0.0642141	0.00577224	0.0806448	0.00550954	0.42601	0.29498
cg21322436	-0.0685206	0.00897424	0.036079	0.00559079	0.0576689	0.108695
cg17287155	0.0569935	0.0216373	0.0464336	0.00696475	0.219797	0.00193303
cg05460226	-0.00475034	-0.00117263	0.032444	0.00471468	0.883607	0.803618
cg05183538	0.0447004	-0.0015236	0.0465876	0.00680332	0.337422	0.822832
cg06459104	-0.067116	-0.00988387	0.0686554	0.00485914	0.328444	0.0421478
cg23771366	0.00417525	-0.00447616	0.0324592	0.00293491	0.897666	0.127473
cg01429256	-0.00876753	-0.00404613	0.0136223	0.00229393	0.519887	0.0779945
cg24389054	-0.0264224	0.00266917	0.0427901	0.00537494	0.536986	0.619558
cg23067299	-0.0119743	0.00422768	0.0692772	0.00998489	0.862789	0.672068
cg11902728	0.0234283	-0.00146795	0.0240352	0.00348127	0.329797	0.673337
cg25212025	-0.083596	-0.00219074	0.0391106	0.00343338	0.0327163	0.523539
cg01873977	-0.0640638	-0.00732967	0.0452112	0.00574395	0.156649	0.202159
cg04517079	-0.0458444	0.0011368	0.0249875	0.00260028	0.0667277	0.662051
cg18335991	0.0300687	-0.00296634	0.0245876	0.00374147	0.22149	0.428025
cg01756424	0.00572569	-0.00226219	0.0151724	0.00223392	0.705932	0.311415
cg08472795	0.0251821	-0.00676373	0.0250865	0.00357976	0.315586	0.0590541
cg05824218	0.000261449	-0.00381293	0.017167	0.00271753	0.98785	0.160834
cg25730428	0.0172226	-0.00198688	0.0291385	0.00330829	0.554555	0.548228
cg07826859	0.0169253	-0.00414347	0.0204062	0.00327757	0.406953	0.206391
cg00689360	0.00361788	-0.00251085	0.0502278	0.00663613	0.942586	0.705225
cg15212295	-0.0156709	-0.00166043	0.0303295	0.00509695	0.605423	0.744652
cg07339236	-0.0663767	0.0116085	0.0544678	0.00940191	0.223099	0.217166
cg19254163	0.0214148	-0.00873918	0.0243415	0.00306183	0.379097	0.00438259
cg19918734	-0.00265798	-0.00125019	0.0257774	0.00426361	0.917882	0.769399
cg12076915	0.00107098	0.000694224	0.039676	0.0032346	0.978469	0.830094
cg06595162	0.00584406	0.00223689	0.0266644	0.00338904	0.82654	0.509347
cg15408734	0.0213356	-0.00553996	0.0301066	0.00433743	0.47861	0.201745
cg04044720	-0.0172824	0.00182213	0.0312379	0.00490678	0.580148	0.710439
cg26707709	-0.0369078	0.000896486	0.0927101	0.00703089	0.690614	0.898559
cg15342087	0.0328289	-0.00399957	0.0355313	0.00495682	0.355626	0.419882
cg02980249	0.0170448	0.00203926	0.0254637	0.00267421	0.503349	0.445867
cg24681208	-0.00546026	-0.00504762	0.0210544	0.00324906	0.795396	0.120532
cg03991871	0.00132517	-0.00690105	0.0580377	0.0053401	0.981786	0.196481
cg18642234	-0.0361665	-0.000776134	0.0207869	0.00269286	0.0820407	0.773225
cg13500388	-0.00439585	-0.00192344	0.0269546	0.00412725	0.870468	0.64127
cg19593285	0.0224431	0.00144141	0.0384691	0.00579208	0.55968	0.80351
cg04359840	-0.0307454	-0.00191989	0.0322044	0.00366422	0.339861	0.600398
cg00563932	0.0399887	-0.00496544	0.0223571	0.00280438	0.0738375	0.0768706
cg03999941	0.00887938	-0.00962128	0.0424943	0.00600337	0.834505	0.109265
cg03604011	0.00911379	0.0210007	0.0945839	0.0132031	0.923247	0.111946
cg12075928	0.0721055	0.00233285	0.0407761	0.00668415	0.0771389	0.727137
cg10012530	0.000984129	0.00549526	0.0268144	0.00414775	0.970726	0.185448
cg14906103	0.00591155	0.003242	0.0276525	0.00430775	0.830738	0.451828
cg13832201	-0.0272734	0.000240243	0.0294015	0.00334533	0.353731	0.942761
cg00541303	-0.0249039	0.00472493	0.0327703	0.00430379	0.447374	0.272473
cg13127741	-0.000412759	0.000385773	0.0281943	0.00331001	0.988321	0.907237
cg23110422	0.0290383	0.00848068	0.0470503	0.00697092	0.537184	0.223986
cg14012925	0.0149594	0.000132168	0.0328666	0.00383154	0.649053	0.972488
cg17971600	0.00769374	0.000301624	0.0134353	0.00225105	0.566935	0.893429
cg21140898	-0.0526691	-0.00209815	0.068338	0.00859579	0.440972	0.8072
cg20303561	0.00553903	-0.000759016	0.0352279	0.00413252	0.875078	0.854302
cg21393163	0.030119	-0.00509868	0.0524697	0.00556639	0.566025	0.359849
cg01208318	0.0240405	0.00512324	0.0560919	0.00473601	0.668281	0.279558
cg05673882	0.0243331	-0.000460572	0.0436944	0.00447095	0.577675	0.917967
cg19372602	-0.000338075	0.00478083	0.0353758	0.00558444	0.992376	0.392102
cg16276850	-0.0141668	0.00132608	0.0203903	0.00346786	0.487259	0.702235
cg26764244	-0.125233	0.00554679	0.0580965	0.00548705	0.0312627	0.31226
cg12758082	-0.00765809	-0.000138657	0.0179296	0.00265275	0.669335	0.958322
cg15892280	-0.0235899	-0.00416776	0.0166697	0.00251048	0.157174	0.0971284
cg23090529	-0.0312602	-0.0102104	0.0562086	0.00727993	0.578176	0.160994
cg04039397	0.03226	-0.00418698	0.0611906	0.00828582	0.59811	0.613421
cg00116430	-0.020005	-0.00874119	0.0403066	0.00363993	0.619736	0.016471
cg09109520	0.0163583	-0.0028069	0.0435094	0.00378252	0.706988	0.458178
cg26337070	0.0286257	-0.00792745	0.0608761	0.00521756	0.638258	0.128914
cg10807309	0.032287	-0.00166978	0.0354774	0.00340434	0.362919	0.623873
cg12803068	-0.175845	0.00360213	0.0907442	0.00554531	0.0528437	0.516077
cg12423733	-0.0115206	0.0224161	0.0653693	0.00900126	0.860124	0.0128867
cg23351584	0.0662146	-0.0114379	0.0319832	0.00541583	0.038531	0.0348818
cg27598208	0.0223339	-0.00347395	0.0312649	0.00430852	0.475097	0.420218
cg16834726	-0.0235165	0.00395801	0.0233503	0.00406617	0.313979	0.330541
cg25212453	0.154901	-0.00299832	0.0567841	0.00797785	0.00642874	0.707105
cg22403782	-0.0588493	0.00545147	0.0569102	0.0043411	0.301268	0.209421
cg04521626	0.00383146	-0.00188799	0.0195893	0.00289029	0.84495	0.513736
cg00808648	-0.0339092	0.00604985	0.0212205	0.00389822	0.11018	0.12092
cg15159987	-0.018029	0.00167895	0.0218995	0.00307097	0.410455	0.584668
cg26282236	0.00299836	0.000385426	0.0390101	0.00316766	0.938744	0.903175
cg02743070	0.00557024	0.00365033	0.0204861	0.00336058	0.78572	0.277582
cg23480021	-0.0163367	0.00922447	0.110843	0.0102988	0.882846	0.370589
cg19427338	0.0353459	-0.00855161	0.0348694	0.00433561	0.310873	0.0487768
cg15600935	0.00686087	-0.00483139	0.0428852	0.0075413	0.872908	0.521856
cg04039799	0.0247955	-0.00331856	0.023003	0.00326016	0.281193	0.308911
cg11263997	0.0325465	-0.00619165	0.0458944	0.00617094	0.478307	0.315875
cg02985540	-0.0262186	0.00102936	0.0283168	0.00305624	0.354626	0.736316
cg07123182	0.0456941	-0.0182815	0.0726855	0.0113356	0.52964	0.107038
cg23781467	-0.00834772	0.00189308	0.026065	0.00294934	0.748805	0.521076
cg00687135	-0.0244159	0.00395751	0.0492734	0.00649937	0.620289	0.542693
cg03188382	0.0295476	-0.00830349	0.029231	0.00308004	0.312243	0.00711515
cg07626482	0.0525359	-0.00618405	0.0254408	0.00264009	0.0390743	0.0193152
cg08396193	0.00264967	0.00373172	0.0405061	0.00602372	0.94785	0.535693
cg01901332	0.0488107	0.00392855	0.0341569	0.00388009	0.153178	0.311495
cg07967717	0.0256288	-0.00171038	0.0265976	0.00332099	0.335382	0.606628
cg01062937	0.0122877	-0.00119636	0.0179781	0.00240177	0.494382	0.618488
cg02657160	-0.0156214	0.00545845	0.0359251	0.00621153	0.663723	0.379693
cg12101586	-0.0355572	-0.0197877	0.0683022	0.00607782	0.602727	0.00116015
cg06648759	-0.0256321	0.00249806	0.0278517	0.00349657	0.357531	0.475089
cg27286011	0.0439385	-0.00259206	0.0332967	0.00351066	0.187144	0.46044
cg17551891	-0.0494494	-0.0104974	0.0570666	0.0053244	0.386335	0.0488768
cg02547394	0.0369963	-0.00694555	0.0435042	0.00722037	0.395185	0.336264
cg05951221	0.00169943	-0.000553227	0.0426382	0.0038498	0.968212	0.885758
cg04704634	0.0140021	-0.00830923	0.0276009	0.00401798	0.611993	0.0388366
cg03450842	-0.00676228	0.00438891	0.0233493	0.00298124	0.772143	0.141215
cg11436113	0.0180719	-0.00335359	0.024126	0.00349214	0.453903	0.337071
cg08266095	-0.0397813	-0.00131955	0.0449812	0.00438986	0.37661	0.763774
cg15417641	0.0162738	-0.00619553	0.0708499	0.00634706	0.818359	0.329184
cg09701700	-0.0398787	-0.00249009	0.0324794	0.00303104	0.219697	0.411497
cg02375409	0.0718135	-0.00771825	0.0378633	0.0037614	0.0580458	0.0403759
cg05906166	0.0141946	-0.008479	0.0689566	0.00491936	0.836938	0.0850193
cg03194226	0.0283368	-0.0143647	0.0321889	0.00507955	0.378774	0.00475604
cg26361535	-0.0280098	-0.00282386	0.0455674	0.00399456	0.538849	0.479741
cg13543915	0.000469178	0.00284098	0.0208041	0.00291164	0.98201	0.329379
cg10592592	0.0309923	-0.00247455	0.0364103	0.00344829	0.394786	0.473122
cg27178191	-0.00269409	-0.00297313	0.0182763	0.00251399	0.882824	0.237169
cg11071448	-0.0394635	0.00935701	0.0306806	0.00520856	0.198473	0.0726515
cg01692968	-0.0621209	-0.000110042	0.0406202	0.00590829	0.126336	0.985143
cg00533649	0.00972348	-0.00520488	0.0293676	0.00232759	0.740619	0.0255129
cg09762515	0.00225844	0.00391021	0.0312276	0.00501495	0.942352	0.435705
cg04324758	-0.00929884	0.00882417	0.0667137	0.00973179	0.88916	0.364714
cg24090911	0.0156454	-0.0114388	0.0413507	0.00720821	0.705197	0.112771
cg07178945	-0.0255214	-0.00465717	0.0363271	0.0030045	0.482446	0.121368
cg24230340	0.0159363	-0.00267343	0.0445846	0.00402846	0.720811	0.507042
cg18961281	0.0192409	-0.00305793	0.0232309	0.00375762	0.407618	0.415912
cg25305703	0.0216947	0.000991612	0.049533	0.0061142	0.661448	0.871188
cg08595501	0.0531235	-0.0166613	0.0522636	0.00919223	0.309514	0.0701273
cg10919522	-0.0219569	-0.00092494	0.035302	0.00524827	0.534024	0.860135
cg26703534	-0.00693746	-0.00116961	0.022168	0.00297949	0.754353	0.694715
cg00893603	-0.055505	-0.00613407	0.0559195	0.00483867	0.321064	0.205127
cg23126342	0.0473452	0.0162057	0.0562824	0.00625684	0.400346	0.00970237
cg01127300	0.0149204	-0.00644874	0.0398277	0.00288751	0.707993	0.0256975
cg20483374	-0.0256103	-0.000107341	0.0206661	0.00324953	0.215385	0.973654
cg21611682	0.0103484	-0.00130851	0.0217769	0.00258895	0.634702	0.613348
cg19719391	-0.0228474	-0.000813136	0.0281922	0.00364903	0.417801	0.823698
cg00378510	0.024274	-0.00350102	0.0717117	0.00489827	0.73504	0.474895
cg26540191	-0.0440348	0.00933611	0.0718286	0.0101696	0.539913	0.358804
cg03636183	0.0236183	-0.00652913	0.0391103	0.00370263	0.546002	0.0780743
cg22851561	-0.0381914	0.00532667	0.0251101	0.004241	0.128402	0.209347
cg03220447	0.0149098	-0.00175578	0.0232587	0.00364991	0.521562	0.630565
cg27332104	0.0128116	-0.00440658	0.0280031	0.0038957	0.647357	0.258213
cg08038054	-0.0402124	-0.000162198	0.0406908	0.00546598	0.323154	0.976332
cg12876356	-0.0486745	0.000857281	0.0628275	0.00571606	0.438613	0.880806
cg25013095	0.146975	-0.00925887	0.0636066	0.0119298	0.0209296	0.437823
cg13787850	0.0384695	-0.000695687	0.0375234	0.00421455	0.305403	0.868916
cg07090714	-0.0113061	-0.00566591	0.0364484	0.00377125	0.756451	0.133241
cg09247392	-0.0273779	0.0052409	0.0221322	0.00353449	0.216208	0.138375
cg00295485	-0.0233288	0.000624523	0.0318254	0.00419855	0.46363	0.881776
cg12303084	0.0353295	-0.00895636	0.031284	0.00320129	0.258928	0.00522321
cg24838345	-0.0826873	-0.000529812	0.0559362	0.00891808	0.13948	0.952636
cg00968616	-0.00483131	0.000238774	0.0210231	0.00310777	0.818261	0.938769
cg15059804	0.0513539	0.00141153	0.0453701	0.00376403	0.257856	0.707718
cg19838043	0.0159292	-0.00358117	0.0313035	0.00322379	0.610913	0.266837
cg16219322	-0.0086527	0.011236	0.0277753	0.00507181	0.755428	0.026905
cg23230929	0.0195161	-0.00134895	0.0244526	0.0025645	0.424914	0.598972
cg07954423	-0.0383317	-0.000894311	0.0399456	0.00520096	0.337378	0.863503
cg05329352	-0.0188463	-0.00880345	0.0420063	0.00359529	0.653744	0.0144728
cg13074055	-0.000265265	0.000358796	0.076043	0.00950287	0.997217	0.969888
cg02556928	-0.0603801	0.00539251	0.0453074	0.00446024	0.182822	0.226875
cg21446172	-0.0142892	0.00117956	0.0285096	0.00376103	0.616282	0.753854
cg16116321	0.0439969	-0.00208442	0.0316966	0.00294757	0.165308	0.479589
cg16178855	0.0324956	-0.000352707	0.0220516	0.00285056	0.140746	0.901546
cg03004371	-0.098889	0.0137916	0.0538442	0.00466448	0.0664624	0.00316572
cg09935388	-0.0362388	-0.00998776	0.0626121	0.00577542	0.562817	0.0839845
cg19940644	-0.00982012	-0.00810058	0.0462756	0.00470127	0.831969	0.0851162
cg10691866	0.00617771	-0.0060033	0.0453248	0.00364351	0.891603	0.0996627
cg27312979	8.92396e-05	-0.00338764	0.0598152	0.00431039	0.99881	0.432055
cg11430077	0.0467256	-0.00561365	0.0538711	0.00648537	0.385857	0.386876
cg12126344	-0.0201579	0.00865206	0.0269687	0.00444251	0.454865	0.0516882
cg10062919	-0.0109523	-0.00336597	0.015882	0.00210744	0.490522	0.110468
cg09465703	0.0440033	0.00467996	0.0742693	0.00765193	0.553607	0.540907
cg26703507	0.0327731	0.00372897	0.0363158	0.00492764	0.366927	0.44934
cg12474798	-0.0315801	0.00359591	0.0532478	0.00424257	0.553218	0.396831
cg01272202	0.00278946	0.00901743	0.0294569	0.00411999	0.924565	0.0287959
cg06819357	-0.0275792	0.00110177	0.0348794	0.00379407	0.429227	0.771562
cg07381806	-0.0119025	-0.00016935	0.0569053	0.00867143	0.834341	0.984422
cg24497361	-0.00907088	-0.00423636	0.025141	0.00293846	0.718291	0.149633
cg08757670	-0.00674323	-0.00340768	0.0226244	0.00387682	0.76569	0.37957
cg26669717	0.0220094	0.00215027	0.0210651	0.00297466	0.296223	0.469897
cg15542713	0.022841	0.0121016	0.065569	0.00619735	0.727623	0.0510694
cg01218206	0.032875	0.00628919	0.0336262	0.00556382	0.328342	0.25853
cg01015663	0.00426082	-0.00595971	0.0279152	0.00378601	0.878702	0.115698
cg22100563	-0.0611817	0.0101036	0.0359258	0.00558685	0.0887067	0.0707683
cg24996979	-0.0305576	-0.00241761	0.0257759	0.00380331	0.235946	0.52511
cg22635676	0.0113061	-0.00126763	0.17891	0.0128742	0.949621	0.92158
cg25197194	-0.00264898	-0.00110771	0.037919	0.00440264	0.944314	0.801389
cg16062877	-0.0304656	0.00525459	0.018353	0.00298423	0.0970529	0.078511
cg00210249	0.0338259	-0.00482261	0.043769	0.00477866	0.439729	0.31307
cg27467282	0.00118602	-0.00263125	0.0369178	0.00522419	0.974375	0.614581
cg05677062	-0.0337072	-0.00143811	0.0379589	0.00402412	0.374669	0.720872
cg15498134	0.0904125	-0.00343437	0.0465903	0.00735774	0.0524332	0.640744
cg09084391	-0.065711	0.0011699	0.0702252	0.00828769	0.349542	0.887764
cg03254067	-0.0426483	0.00708462	0.0306092	0.0050587	0.163655	0.161607
cg11094248	-0.012343	-0.000797974	0.0199926	0.00344621	0.537041	0.816924
cg15963463	0.0113411	-0.00717483	0.0259745	0.00376678	0.662428	0.0570366
cg01763916	0.00638386	0.00217821	0.0238918	0.00384265	0.78934	0.570914
cg06321596	-0.00645257	0.0048473	0.0391022	0.00483861	0.868947	0.316627
cg12513616	0.00495287	-0.00687884	0.0267533	0.00298381	0.853148	0.0213036
cg11701312	0.0294911	-0.00240942	0.018871	0.00224293	0.118278	0.28292
cg04858631	0.0334135	0.00201227	0.0366072	0.00642488	0.36146	0.754179
cg11390978	-0.0280098	0.00891264	0.0652613	0.0117492	0.667819	0.448242
cg27262054	0.000219598	-0.00943578	0.0362807	0.00369799	0.995171	0.0108372
cg24688690	-0.00517047	-0.000496418	0.0161045	0.00250669	0.748197	0.843047
cg06369322	-0.00764115	0.00339995	0.0200024	0.0028929	0.702491	0.2401
cg04673446	0.0377342	-0.00277505	0.0222849	0.00400082	0.0905294	0.488044
cg19325791	-0.0206119	0.00368182	0.0337316	0.00552954	0.541222	0.505629
cg19744173	-0.0252794	-0.00585617	0.0241844	0.00327931	0.296021	0.0743665
cg07029024	-0.0277537	-0.00300664	0.0356154	0.00476419	0.435918	0.528092
cg25317941	0.0126726	-6.12881e-05	0.0215857	0.00383375	0.557202	0.987248
cg25727671	-0.0505526	0.0156789	0.0552842	0.0090257	0.360594	0.0825984
cg26850624	-0.0639208	-0.00302359	0.0622142	0.00419872	0.304388	0.471581
cg13518625	0.0266212	0.00664667	0.085946	0.0128131	0.756786	0.604031
cg17566560	0.00125418	0.00129595	0.0273254	0.0051075	0.963395	0.799741
cg16611234	-0.0037174	-0.00134379	0.0486094	0.00527919	0.93905	0.799115
cg16151538	-0.0178494	-0.00125423	0.0257468	0.00454712	0.488207	0.782722
cg04368724	0.0543543	-0.00183139	0.0437296	0.00486891	0.214048	0.706874
cg14264316	-0.0285116	0.000485332	0.0291382	0.00528028	0.327924	0.926781
cg26151910	0.0113042	-0.00326138	0.039494	0.00631873	0.774732	0.605842
cg26486070	0.0209434	-0.00324823	0.0399815	0.00380284	0.60047	0.393176
cg14254999	0.00527728	0.00141871	0.0468856	0.00847193	0.910391	0.867034
cg00699986	0.0202609	0.00447579	0.0285738	0.00467666	0.47835	0.338723
cg06688763	0.0241096	0.00501084	0.0777229	0.00597049	0.756452	0.401474
cg15700587	0.0241397	-0.00419422	0.0300867	0.00545718	0.422432	0.442289
cg03489965	0.023251	0.00132169	0.0414293	0.00456327	0.574718	0.772141
cg07413467	-0.00139258	0.00239652	0.0433245	0.00402673	0.974362	0.551846
cg01731783	0.0197706	0.00320416	0.0158452	0.00265895	0.212252	0.228403
cg06635952	-0.00875553	-1.03261e-05	0.0258948	0.00335139	0.73531	0.997542
cg17087741	0.0496121	0.0041346	0.0697989	0.0115319	0.47729	0.720003
cg20438687	0.00493846	-0.00438295	0.0339852	0.00381202	0.884481	0.250452
cg07986378	0.00255962	-0.00027737	0.0437953	0.00743409	0.953399	0.970243
cg22356527	0.02453	-0.00867787	0.0313901	0.00560405	0.434609	0.121746
cg01839993	0.0404304	-0.00166085	0.0310597	0.00286813	0.193207	0.562643
cg13020466	0.0278405	-0.000127091	0.0273131	0.00453306	0.308161	0.977637
cg01951879	0.0140445	-0.00398826	0.0444558	0.00602182	0.752096	0.507895
cg24931658	-0.00822454	0.0012265	0.0261581	0.00314641	0.753241	0.696742
cg16398761	-0.090588	0.0142963	0.063147	0.0104417	0.151546	0.171191
cg26196424	0.0105296	-0.00491456	0.0373102	0.00547746	0.777803	0.369762
cg14563949	-0.0211583	0.00380842	0.0199933	0.00310289	0.290046	0.219905
cg09554443	-0.0101131	0.00210099	0.031379	0.00297505	0.747275	0.480188
cg07069636	0.0136008	-0.00413916	0.0218324	0.00256946	0.533385	0.107447
cg09560590	-0.0248454	-4.01596e-05	0.034357	0.00349246	0.469685	0.990827
cg04907244	-0.0866157	-0.00879261	0.0569307	0.00528005	0.128352	0.0961077
cg23576855	0.303759	-0.011239	0.150236	0.00603659	0.0433851	0.0628547
cg16519923	0.015764	0.00045726	0.0256997	0.00417069	0.539677	0.912715
cg04806562	0.0213995	-0.000209621	0.0188218	0.00276249	0.255687	0.939525
cg12619504	-0.0306325	0.00634457	0.0338034	0.00283961	0.364973	0.0256318
cg09848445	0.0139453	0.010432	0.0634987	0.0113451	0.826189	0.357995
cg26477856	0.0207547	-0.00169673	0.0182349	0.00287171	0.255164	0.554731
cg24556382	-0.00133208	-0.00312513	0.0475684	0.00527512	0.977663	0.553669
cg23401251	-0.00246967	-0.00226349	0.02777	0.00425184	0.929143	0.59457
cg19859270	-0.00193722	-0.00220977	0.0413904	0.00749683	0.962673	0.768224
cg19459791	0.0180025	-0.000187913	0.0382454	0.00460976	0.637902	0.96749
cg11231349	0.100348	-0.0108523	0.0538891	0.00743271	0.0627305	0.144513
cg03399898	-0.0220873	-0.00101153	0.0650386	0.00519043	0.734202	0.845515
cg16255816	0.00662729	-0.00472075	0.0314416	0.00371323	0.833082	0.20384
cg10874644	-0.0062543	-0.00475588	0.0613637	0.0077502	0.918829	0.539557
cg17668731	-0.0100826	0.00212862	0.0193453	0.00337313	0.602281	0.528118
cg14435720	0.0630197	0.00971098	0.0816528	0.0122844	0.440316	0.429373
cg09658497	-0.089129	-0.00261069	0.0966094	0.00795426	0.356376	0.742804
cg06885459	-0.0592511	0.00456238	0.0358104	0.00332579	0.098205	0.170357
cg01207684	0.0373931	-0.00842588	0.0606669	0.00737527	0.537727	0.253479
cg08606254	-0.0265816	-0.0107912	0.0525162	0.00748998	0.612797	0.149897
cg00336149	-0.0157239	-0.00420584	0.0496822	0.0033915	0.751677	0.21516
cg21473814	0.0106243	0.00717333	0.0363144	0.00411964	0.76989	0.081878
cg18146737	-0.146485	0.000974674	0.172194	0.0156816	0.395065	0.95045
cg02583484	0.00502852	-0.00501292	0.0295971	0.00273825	0.865111	0.0673778
cg20357806	-0.0052218	0.00414797	0.0332336	0.00525256	0.875161	0.429844
cg06972908	-0.00403117	-0.00431858	0.0260694	0.00448621	0.877124	0.335911
cg04701628	-0.011215	0.00342299	0.0192252	0.00329155	0.559715	0.298566
cg26718213	-0.000694557	-0.00284971	0.0847967	0.00520054	0.993466	0.583815
cg16201146	0.0470941	-0.0058477	0.0291802	0.0044184	0.106692	0.18591
cg25748521	0.024593	-0.00467816	0.0238636	0.00394519	0.302851	0.235922
cg13193840	-0.0860783	-0.0103153	0.0632095	0.0117007	0.173384	0.378158
cg20684110	-0.0242406	-0.00397128	0.0461132	0.00423907	0.599188	0.349027
cg15806304	0.0211041	0.00572292	0.0259965	0.00335748	0.417004	0.0885229
cg26844633	0.00156106	0.00679811	0.047546	0.00746571	0.973811	0.362686
cg03348792	0.0243986	0.00689291	0.0298844	0.00429944	0.414345	0.10913
cg08035323	0.0291609	-0.0100208	0.0491522	0.00434888	0.553081	0.0213688
cg21188533	-0.0586074	-0.0056762	0.0863923	0.00650721	0.497631	0.38321
cg23441210	0.00521457	-0.00180431	0.0288006	0.00524801	0.856337	0.731047
cg11557553	0.0322648	-0.000688812	0.0226659	0.00399641	0.154719	0.863183
cg13428066	-0.0134723	0.00225423	0.0244845	0.00383292	0.582211	0.556555
cg13937905	-0.0303876	0.010816	0.0580224	0.00677223	0.600537	0.110493
cg22407942	-0.0552037	-0.0127949	0.0492986	0.00414145	0.262981	0.00204813
cg20295214	0.0689854	-0.00620914	0.0350919	0.00583618	0.0494326	0.287569
cg26364091	0.00126049	-0.00459093	0.0235562	0.00305025	0.957331	0.132541
cg26963277	-0.0723087	-0.000549022	0.0605902	0.0067461	0.232871	0.935149
cg10678215	-0.0239903	0.00962039	0.0398758	0.00600083	0.547486	0.109138
cg08972170	-0.0433623	0.0152482	0.0391846	0.00530228	0.268592	0.00409637
cg10965178	-0.0516621	0.00271541	0.0291768	0.00351528	0.0767829	0.439982
cg01481251	-0.0457883	-0.00593863	0.0556711	0.00849391	0.410893	0.484575
cg25949550	-0.00921376	-0.00419561	0.0356704	0.00414581	0.796203	0.311723
cg14580211	-0.0240321	9.1771e-05	0.031766	0.00397714	0.449423	0.981594
cg19816811	-0.0964149	0.00141688	0.0458648	0.0032761	0.0357086	0.665459
cg24698211	0.00894048	-0.00138537	0.0328532	0.00365963	0.785551	0.705081
cg25921609	-0.0238804	0.00388638	0.0374617	0.00494073	0.523898	0.431661
cg20305005	-0.0103594	0.00147172	0.0334052	0.00451202	0.756507	0.744342
cg10592478	-0.037243	-0.00518016	0.0461471	0.00793284	0.419717	0.51387
cg09975715	0.0336834	-0.00173375	0.0358933	0.00596869	0.348119	0.7715
cg21869609	0.174424	-0.00410584	0.0973257	0.00543307	0.0733208	0.449959
cg23842572	0.00189233	-0.00425681	0.0287828	0.00431478	0.947587	0.324038
cg01744331	-0.0644706	-0.00117137	0.073894	0.0113418	0.383044	0.917758
cg16391678	0.0152715	-0.00350057	0.0240078	0.00379144	0.524772	0.356036
cg08666707	0.020098	0.00554315	0.0208806	0.00322616	0.335892	0.0860048
cg22876908	0.0283241	-0.00632686	0.0205932	0.00299858	0.169153	0.0350632
cg23594345	0.0340095	0.00385894	0.0567566	0.00567847	0.54911	0.496896
cg25292882	0.0518897	0.00152892	0.0444408	0.0077889	0.243076	0.84441
cg14817490	-0.0284823	0.000612684	0.042325	0.00429147	0.501078	0.886496
cg26995224	0.0509069	-0.00525619	0.0550435	0.00333169	0.355201	0.114893
cg19089201	-0.209504	-0.00365826	0.108835	0.0089586	0.0544171	0.683082
cg02917867	0.0282509	-0.00236657	0.0254436	0.00326287	0.266994	0.468399
cg10403394	-0.0587227	0.00735017	0.0715793	0.00513657	0.412129	0.152689
cg13038618	0.017952	-0.00519164	0.0351982	0.00523724	0.610086	0.321727
cg11225089	-0.0084409	0.011893	0.0251879	0.00403415	0.737568	0.00325496
cg10827488	-0.0114912	-0.00120832	0.0264185	0.00389646	0.663629	0.75653
cg03660377	-0.0138342	-0.0024393	0.0523179	0.0076702	0.791477	0.75052
cg10255761	0.0465882	-0.00563615	0.0280153	0.00305729	0.0965027	0.0654845
cg01097768	0.0434594	-0.00513977	0.0261203	0.00479234	0.0962734	0.283695
cg11666770	-0.0876657	-0.0105215	0.115572	0.00661851	0.448256	0.112144
cg17333042	0.0190631	-0.00421953	0.0225018	0.00257047	0.397008	0.100928
cg09469355	0.0449659	-0.00693356	0.0245856	0.00286915	0.0675709	0.0158033
cg18900812	0.0107019	0.00589223	0.0504367	0.00854765	0.831981	0.490738
cg18295744	0.0025884	-0.00379617	0.0219265	0.00368248	0.906039	0.302792
cg02228160	-0.0130142	0.00108396	0.032574	0.00341696	0.689556	0.751121
cg26788216	0.0299167	-0.00575567	0.0341351	0.00448104	0.380909	0.199214
cg11207515	0.0229087	-0.000529368	0.0520187	0.00605038	0.659704	0.930293
cg20066188	0.0707837	-0.00454613	0.0496652	0.00321401	0.154311	0.157464
cg01294327	0.0801714	0.00345787	0.0707246	0.00423921	0.257165	0.414829
cg10750182	-0.0148176	0.00470545	0.0164845	0.00255147	0.368811	0.0653818
cg11145461	-0.046026	-0.00304807	0.040292	0.00662756	0.253441	0.645659
cg16880946	-0.0784476	0.00179532	0.0391613	0.00269214	0.0453406	0.50497
cg00871371	-0.00558748	0.00427315	0.0241309	0.00328984	0.816912	0.194214
cg08899667	0.0165387	0.00317282	0.0278023	0.00297695	0.552011	0.286724
cg11197630	-0.00984176	0.000431319	0.0507277	0.00920803	0.846183	0.962647
cg26878655	-0.0305962	0.000177204	0.0298258	0.00542565	0.30507	0.97395
cg08386009	0.00876428	-0.00291952	0.017533	0.00287679	0.617212	0.310365
cg09022230	-0.00838399	0.00635088	0.0335989	0.00372133	0.802979	0.0881363
cg22937882	-0.0355337	0.0101938	0.0277959	0.00464815	0.201241	0.0284794
cg03611151	0.00187836	-0.0005714	0.0317712	0.00448598	0.952861	0.898664
cg15636519	0.0388876	-0.0127676	0.0460242	0.00774195	0.39823	0.0993608
cg13582060	-0.0363497	0.00984826	0.0624542	0.00836165	0.560618	0.239102
cg08947774	0.0198593	-0.00536227	0.0297768	0.00437724	0.504883	0.220784
cg00324097	0.032318	-0.00504648	0.0180405	0.00262388	0.0733704	0.0546655
cg00911794	-0.0587178	0.00057763	0.0477617	0.00648799	0.21907	0.929072
cg12806681	0.0373827	-0.00499805	0.0478122	0.00654679	0.434384	0.445345
cg20873136	-0.00284359	0.00357563	0.0256331	0.00421804	0.911678	0.396763
cg14165660	0.0213531	0.000918001	0.0298504	0.00427817	0.474479	0.83013
cg05517711	0.00755452	-0.00367326	0.0180477	0.002613	0.675561	0.160034
cg10179300	-0.0325672	0.00590724	0.042915	0.00567199	0.448016	0.297848
cg06294803	-0.00862348	-0.00965597	0.0477973	0.00636407	0.856843	0.129445
cg06151964	-0.00620277	-0.000698052	0.0194962	0.00301277	0.750399	0.81681
cg06394460	0.000415009	0.00540924	0.0538071	0.00776363	0.993847	0.48609
cg06513247	0.0278586	-0.00475203	0.0166259	0.00258257	0.0939539	0.065992
cg19406367	0.0305639	-0.00411672	0.0437839	0.00456568	0.485235	0.367402
cg03415545	0.0184442	0.00145371	0.0558276	0.00858065	0.741145	0.865495
cg02101876	-0.00632346	-0.00159099	0.0510956	0.0090931	0.901517	0.861133
cg02556393	-0.037794	-0.0103939	0.0399844	0.00488805	0.34467	0.0336615
cg25421530	0.027423	-0.000760075	0.0442531	0.00669208	0.53553	0.90959
cg01435643	-0.0914549	0.00961331	0.0569373	0.00508937	0.108421	0.0591271
cg17814814	-0.012864	-1.34598e-05	0.0222901	0.00335962	0.56392	0.996804
cg02013841	0.0345955	-0.00686229	0.0543086	0.0100959	0.524172	0.496808
cg06949439	-0.0504204	-0.00498831	0.0331064	0.00334937	0.127952	0.136663
cg10520740	0.0276811	-0.00183452	0.0184077	0.00285565	0.132781	0.520717
cg15482893	-0.00910199	0.00881331	0.0362909	0.00530024	0.801988	0.0965916
cg02782510	-0.0143614	0.00458273	0.032023	0.00520721	0.653855	0.37898
cg14093127	0.0753782	-0.00846642	0.049196	0.0060183	0.125643	0.159731
cg26790897	-0.0135264	0.00396907	0.0306088	0.00445962	0.658597	0.373629
cg01856529	-0.021249	0.00106401	0.0342949	0.00568295	0.535583	0.85151
cg05529343	-0.0210305	0.00310047	0.0834109	0.00864092	0.80097	0.719795
cg02186444	0.0222944	-0.00361321	0.0259368	0.00274122	0.39015	0.187704
cg14142087	0.0115334	0.0001746	0.0237865	0.00276381	0.627827	0.949638
cg12547807	0.0306652	-0.00351612	0.022129	0.00269011	0.165992	0.191427
cg10825315	0.0290714	0.00209942	0.0320161	0.00523919	0.363958	0.688697
cg19589396	0.0580558	0.0031224	0.035526	0.00427534	0.102394	0.465327
cg08118908	0.0107601	-0.0106525	0.0450637	0.00714237	0.8113	0.136084
cg00073090	0.0219528	9.48548e-05	0.0236302	0.00301278	0.352998	0.974888
cg01513913	0.0159733	0.00222484	0.0313667	0.0026838	0.610652	0.407265
cg23973524	0.0338493	0.00274169	0.0376871	0.00320372	0.369236	0.392275
cg13976502	-0.0128503	-0.000417342	0.0204735	0.00309078	0.530295	0.89261
cg13525276	-0.000378425	-0.00123351	0.0423167	0.00573535	0.992866	0.829745
cg13039251	0.0140297	0.00700089	0.0521651	0.00544026	0.788003	0.198368
cg08149865	-0.00595289	-0.00164364	0.0272031	0.00298227	0.826807	0.581635
cg25953130	0.0400574	0.00404514	0.0513071	0.00629114	0.435056	0.520345
cg00501876	0.0300191	0.000299224	0.0215007	0.00341127	0.162793	0.930116
cg05969150	-0.0166461	-0.000432599	0.0194187	0.00227205	0.391439	0.849026
cg00976097	-0.00615233	0.0190176	0.173749	0.010857	0.971758	0.0800735
cg23565821	-0.0178217	0.00281325	0.0280984	0.00385167	0.525981	0.465279
cg21161138	-0.00574765	0.00116824	0.0303904	0.00405041	0.850012	0.773068
cg17619755	0.0243155	-0.000388998	0.0475155	0.00415671	0.608907	0.925455
cg11152412	-0.0428572	0.00741844	0.0332858	0.00555076	0.198027	0.181629
cg16936060	-0.0387072	0.00688896	0.0302647	0.00373824	0.201069	0.0655806
cg14712058	-0.0213195	-0.00490578	0.03481	0.00448256	0.540309	0.273978
cg24693803	0.00324842	0.000337127	0.0310102	0.00293419	0.916585	0.908545
cg12406027	-0.00328619	-0.000373228	0.0245423	0.00255956	0.893498	0.884089
cg17038235	-0.0272853	0.00387572	0.0274925	0.00316604	0.321105	0.221118
cg16503724	-0.00818188	-0.00401799	0.0240119	0.00343405	0.733332	0.242198
cg26060489	-0.00709811	-0.00333139	0.0216241	0.00372529	0.742751	0.371349
cg09607043	-0.0357583	0.00816211	0.0396907	0.00608161	0.367727	0.179801
cg12873476	0.0237421	-0.00199575	0.0401612	0.003227	0.554494	0.536384
cg00085013	-0.00360139	0.00839182	0.0245521	0.00360252	0.883395	0.0199892
cg26529655	0.0100776	-0.00242832	0.023216	0.00386615	0.664271	0.530052
cg19211853	0.0842779	0.00466023	0.122697	0.0166683	0.492237	0.77984
cg02451831	0.00461679	-0.00589074	0.0287867	0.00427179	0.872598	0.168137
cg06235438	0.0239876	-0.00636958	0.0279184	0.00491375	0.390311	0.195113
cg02775417	0.0775809	0.00285439	0.0703343	0.0125417	0.270121	0.819999
cg20059928	-0.0294519	0.00223146	0.0463442	0.00330718	0.525199	0.499966
cg10951873	0.0182215	-0.00440102	0.0342235	0.00531617	0.594483	0.407905
cg25809905	0.0379174	-0.00363519	0.0451472	0.00363293	0.401119	0.3172
cg16969872	0.00436981	-0.00179112	0.0391957	0.00439738	0.911243	0.683843
cg19046189	0.00943752	-0.00216259	0.0176655	0.00265119	0.593234	0.414817
cg23667432	0.00791873	0.0056738	0.0210505	0.00364343	0.706819	0.119654
cg01005506	-0.0370072	-0.00303482	0.0338673	0.00283349	0.274689	0.284344
cg14074174	0.0120588	0.000247862	0.0222234	0.00229322	0.587464	0.913945
cg04956244	-0.00953766	0.00483766	0.0169012	0.0026365	0.572593	0.0667503
cg03345925	0.0273225	0.00136215	0.0281566	0.0036063	0.33198	0.705704
cg27537125	0.0184699	-0.00488457	0.0242657	0.00354598	0.44665	0.168597
cg20902353	-0.0142594	0.000938886	0.0186372	0.0027032	0.444296	0.728405
cg13784312	-0.0277082	-0.0527448	0.138352	0.0248504	0.841283	0.033984
cg11902777	-0.0192545	-0.00144166	0.0638599	0.00632922	0.763062	0.819854
cg21747070	0.0150963	0.00282335	0.0362252	0.00318289	0.67693	0.375222
cg17024919	0.114212	0.00261764	0.0741516	0.00529308	0.123714	0.621008
cg21566642	0.0151301	-0.00481653	0.0545819	0.00489288	0.781663	0.325108
cg08763102	0.00208806	-0.000974908	0.0224236	0.00362527	0.925817	0.788034
cg18754985	0.00117629	0.0124259	0.0486897	0.00940687	0.980728	0.186751
cg22132788	-0.221069	0.00634125	0.128511	0.00940852	0.0855996	0.500445
cg03646329	-0.0292748	0.0234715	0.0631219	0.00941807	0.642851	0.0128208
cg14120703	0.00366703	0.000440586	0.0169818	0.00278675	0.829054	0.874402
cg02336104	-0.00149188	0.000823963	0.0348759	0.00313476	0.965885	0.792711
cg04813697	0.0260506	-0.00856013	0.0391601	0.00454183	0.505987	0.0596908
cg03519879	0.0248785	-0.000140089	0.0188357	0.00267279	0.186708	0.958208
cg27449150	0.00634416	0.0024317	0.0320041	0.00483936	0.842884	0.615413
cg04573702	0.0269691	-0.00703054	0.0236355	0.00329616	0.253985	0.0331157
cg07465627	-0.000922921	0.0005078	0.0249256	0.00395152	0.970467	0.897767
cg04970434	0.0444739	0.00489678	0.0290214	0.00368477	0.125577	0.184107
cg04383058	0.0293651	0.00121321	0.0303946	0.00457297	0.334088	0.790821
cg16702313	-0.00136609	0.00173475	0.0196537	0.00353398	0.944591	0.623596
cg23198793	-0.0541196	0.0011483	0.0327686	0.00436298	0.098781	0.792444
cg09578155	-0.0305982	0.0013114	0.0160037	0.00232429	0.0560172	0.572706
cg10788371	-0.00144391	-0.00335829	0.0317622	0.0027136	0.963746	0.216099
cg20103692	-0.000437058	0.00403509	0.0380841	0.00663068	0.990845	0.542931
cg24741609	-0.00351073	-0.000548358	0.0307285	0.00310485	0.909053	0.85984
cg22539182	0.00657439	-0.0005059	0.0257892	0.00242203	0.798811	0.834579
cg12836863	0.00175016	-0.00503399	0.0255611	0.00449952	0.945417	0.26344
cg14977938	0.0407909	0.000701881	0.0327523	0.00352402	0.213141	0.842161
cg06433467	-0.0138797	0.00979323	0.0671133	0.00777252	0.836181	0.207901
cg18991417	-0.0115915	0.00308988	0.0298945	0.00390067	0.698245	0.428424
cg05957567	0.00491128	-0.00232831	0.0229256	0.00305817	0.830393	0.446594
cg02035751	-0.0129673	-0.00213641	0.0208535	0.00307109	0.534122	0.486772
cg19847577	-0.0174667	0.000716164	0.0353932	0.00331053	0.621723	0.828765
cg01442064	0.0024379	-0.00631934	0.0243775	0.0035588	0.920349	0.0760165
cg15087369	-0.0111323	0.00469925	0.0340499	0.00515736	0.743744	0.362374
cg16983588	0.0445852	-0.00662101	0.0444763	0.00427663	0.316275	0.121821
cg14179389	0.0793143	0.00183936	0.0629594	0.00615038	0.207933	0.76494
cg04258133	0.0109838	-0.00282385	0.0411486	0.00483229	0.789553	0.559072
cg09099830	-0.0461227	0.00124817	0.0311415	0.00295993	0.138784	0.673322
cg24719910	-0.0137532	0.00199923	0.0470873	0.00886301	0.77025	0.821571
cg04018738	-0.000440814	0.00329335	0.0752653	0.00628705	0.995328	0.600488
cg19825437	-0.0252488	-0.00271189	0.0317232	0.0036948	0.42619	0.463097
cg09570614	0.010045	-0.000939527	0.0245809	0.00265446	0.682846	0.72344
cg24158160	-0.0220368	0.00198898	0.0277604	0.00483328	0.427375	0.680761
cg21913886	-0.020537	-0.00694101	0.0439724	0.00495669	0.640526	0.161653
cg00835193	0.0347192	-0.000123519	0.0496404	0.00555462	0.484386	0.982262
cg23673974	0.0260455	-0.00649252	0.0230301	0.00402036	0.258195	0.106573
cg01668352	0.0208625	0.00517495	0.0337524	0.00659028	0.536562	0.432456
cg11253886	0.0260757	-0.00389192	0.0364436	0.00321056	0.474401	0.225648
cg18316974	-0.0499733	-0.0144635	0.125188	0.0139948	0.689804	0.301572
cg18625627	-0.0267494	0.00687372	0.0440321	0.00606632	0.543589	0.257383
cg07063068	-0.0837833	0.00140142	0.0631012	0.00999965	0.18439	0.888565
cg26271591	0.0304072	0.0122322	0.0474616	0.00729909	0.521804	0.0940081
cg10814005	-0.10456	0.00845814	0.0404815	0.00548506	0.00986744	0.123312
cg24049493	0.105548	0.00835311	0.0799199	0.00592259	0.186811	0.158665
cg03316752	-0.0661443	0.00217088	0.0482193	0.00799163	0.170276	0.785939
cg05302489	-0.00473581	0.00332791	0.0478417	0.00541535	0.921158	0.538973
cg12729894	-0.025696	0.000857849	0.0246324	0.00345864	0.296988	0.80415
cg03957124	0.00532329	0.000607658	0.0220475	0.00359267	0.80923	0.865714
cg11824827	0.0160652	0.000860511	0.0282269	0.00338089	0.569328	0.799133
cg14089503	-0.012051	0.000652055	0.0393135	0.00468293	0.759231	0.889282
cg19925780	0.0587831	-0.00810953	0.0440694	0.00620005	0.182391	0.191111
cg01017464	-0.00873389	0.0085897	0.0423688	0.00499645	0.836705	0.0858238
cg22845855	-0.00363252	-0.00182993	0.0443729	0.00626421	0.934763	0.770238
cg22870429	0.00989259	0.00196992	0.0270857	0.00381732	0.714975	0.60591
cg03109660	0.0121664	-0.00166656	0.0253682	0.00412076	0.631563	0.685963
cg17924476	-0.0703591	-0.00328893	0.0446357	0.00391984	0.115159	0.401597
cg22891595	-0.0154547	0.00233113	0.0248425	0.00314643	0.533944	0.458899
cg01940273	0.0129256	-0.0054685	0.0363176	0.00368199	0.721957	0.137733
cg04716530	0.0370142	-0.00162933	0.0302113	0.00477563	0.220636	0.733028
cg11554391	-0.0365955	-0.00801738	0.0398864	0.00517402	0.358999	0.121496
cg23233742	-0.0172614	-0.00405479	0.0312523	0.00326095	0.5808	0.213931
cg25648203	-0.0371575	0.00154665	0.0343205	0.00451807	0.279092	0.732162
cg14675361	0.0125776	0.0180195	0.0484207	0.00658245	0.795078	0.00627543
cg23219570	-0.0500847	-0.00262699	0.0315886	0.00370386	0.113018	0.478291
cg22998476	0.0407905	-0.011392	0.0282164	0.00337688	0.148452	0.000764735
cg27405731	-0.0214975	-0.000593357	0.0340091	0.00421767	0.527393	0.888142
cg11690578	-0.0158215	-0.00193491	0.0366425	0.00506262	0.665947	0.702378
cg20244340	-0.0549209	-0.00368415	0.0423375	0.00318755	0.194756	0.247978

## Sheet: all results time
CpG site	time coefficient	time coefficient SE	time coefficient pvalue
cg05575921	-0.0349192	0.00438821	2.99382e-15
cg23079012	-0.0220784	0.00392728	2.1683e-08
cg06126421	-0.00819947	0.00196459	3.14124e-05
cg25512107	-0.00579782	0.00349223	0.0970468
cg07251887	-0.00199384	0.00127951	0.11933
cg14753356	-0.0161425	0.00141759	4.02088e-29
cg25189904	0.0031888	0.00215674	0.139443
cg15022400	-0.0311097	0.00153803	1.36831e-82
cg15187398	0.00372445	0.00148042	0.0119646
cg05875421	-0.0114362	0.00209571	5.48115e-08
cg13184736	0.00629109	0.00293984	0.0324996
cg23161492	-0.00374446	0.00162547	0.0213618
cg09338136	-0.000129995	0.00159321	0.934979
cg12147622	0.0133992	0.00172533	1.30939e-14
cg24540678	0.00566071	0.00149934	0.000164549
cg07306253	0.00294454	0.0014292	0.0395124
cg15474579	-0.00167822	0.00142343	0.238545
cg13399816	0.00450637	0.00149205	0.00256217
cg07202214	-0.00092544	0.00148786	0.534022
cg10380221	0.0126073	0.00157576	2.16541e-15
cg25469474	-0.0139608	0.004509	0.00198899
cg23916896	0.00525287	0.00335875	0.117999
cg04225775	0.00988328	0.00160187	8.3322e-10
cg04180046	-0.00055839	0.00141964	0.694123
cg01836137	-0.00532029	0.00133729	7.20401e-05
cg18446336	-0.00153756	0.00180285	0.393862
cg05194346	-0.0087773	0.0016785	1.89937e-07
cg02257517	-0.0051791	0.00113219	5.08306e-06
cg19827923	0.00160757	0.00127375	0.207075
cg26856289	0.00569691	0.00162043	0.000448747
cg19717773	-0.0106557	0.00244105	1.35043e-05
cg01439566	0.00480699	0.00147623	0.00114941
cg13578465	-0.00502942	0.00200633	0.0122766
cg26077378	0.0029983	0.00284129	0.291442
cg03234777	-0.0167806	0.00210984	3.06752e-15
cg03440944	-0.00207287	0.00198637	0.296831
cg03274391	-0.00599643	0.0030145	0.0468425
cg09717146	0.00119771	0.00180531	0.507134
cg08709672	-0.00637023	0.00124281	3.27178e-07
cg19713851	0.0094745	0.0027631	0.000620136
cg11621113	0.002769	0.00136504	0.042646
cg24859433	-0.00241615	0.00198305	0.223221
cg25560398	-0.00129582	0.00157733	0.411454
cg04885881	0.000632409	0.0016147	0.695356
cg14624207	-0.00580157	0.0012006	1.45786e-06
cg03547355	0.00199962	0.0013371	0.134949
cg16815882	-0.0176037	0.00131213	2.89837e-39
cg03707168	-0.0216672	0.00173258	1.47404e-34
cg21121843	0.00194764	0.00222626	0.381767
cg22117188	-0.000655858	0.00106107	0.536577
cg02532700	-0.0185262	0.00190617	8.37819e-22
cg26242531	-0.00254306	0.00124039	0.0404798
cg19888787	-0.011038	0.00463578	0.0173654
cg24173182	-0.00287001	0.00164315	0.0808625
cg20810975	-0.00771174	0.00117036	5.74581e-11
cg18503679	0.0150398	0.0135116	0.265803
cg16556677	0.00247847	0.00165539	0.134504
cg16145216	0.00852633	0.00156459	5.78233e-08
cg21949830	-0.00312572	0.00269135	0.245627
cg11229399	0.00394981	0.00196637	0.0447128
cg26701785	-0.00207889	0.00314372	0.508519
cg10841124	-0.00716006	0.00246111	0.00366444
cg19798735	0.00354941	0.00315124	0.260165
cg18404811	-0.00498048	0.00156868	0.00152249
cg00871610	-0.00110148	0.00159602	0.490187
cg01899089	-0.0017443	0.00141239	0.216981
cg19572487	0.00436984	0.0019416	0.0245213
cg09716613	0.0153287	0.00172066	1.17735e-18
cg18758622	-0.00536345	0.00113123	2.28187e-06
cg11730703	-0.0106503	0.00208478	3.58891e-07
cg08375941	5.79644e-05	0.00390445	0.988156
cg13418576	-0.00155333	0.00205396	0.449585
cg05284742	-0.00802209	0.00128071	4.63802e-10
cg03329539	0.000402205	0.0016367	0.805909
cg13185177	-0.00851434	0.00193698	1.16474e-05
cg09197783	0.00846611	0.00156365	6.92594e-08
cg27310319	0.00940791	0.00220812	2.14051e-05
cg10420527	-0.00572983	0.000925952	7.41855e-10
cg07180646	-0.00607748	0.00132355	4.70656e-06
cg09662411	-0.0144557	0.00218407	4.69429e-11
cg04551776	0.00587914	0.00171619	0.000626212
cg10251229	-0.00955245	0.00139491	1.00608e-11
cg18092474	0.00712567	0.00225271	0.00158733
cg13247990	0.00661846	0.00123848	1.01988e-07
cg01832549	0.0015714	0.0012194	0.197679
cg08884752	0.0103025	0.00150362	9.78273e-12
cg19713429	0.00124331	0.00157982	0.431384
cg27241845	0.00338863	0.00163446	0.0382838
cg02385153	-0.00437707	0.00241318	0.0698688
cg11660018	-0.00341961	0.00115682	0.00315642
cg21486510	-0.0152034	0.00129402	8.28005e-31
cg16047567	0.00870714	0.00149523	6.8098e-09
cg00310412	5.80851e-05	0.0010212	0.954647
cg05508862	-0.00497593	0.000991256	5.66132e-07
cg17372101	-0.00409711	0.00162039	0.0115369
cg19956914	-0.00294543	0.00144973	0.0423417
cg06644428	0.00671661	0.00438791	0.126005
cg01882991	-0.00274478	0.00142852	0.0548296
cg15693572	-0.00681148	0.00250347	0.00657965
cg21322436	-0.00139912	0.00213511	0.512358
cg17287155	0.0152747	0.00268707	1.5128e-08
cg05460226	0.00636214	0.00183086	0.000522307
cg05183538	0.0149522	0.00263549	1.61286e-08
cg06459104	0.000650562	0.00219112	0.766573
cg23771366	0.00199866	0.00127737	0.11784
cg01429256	-0.00331991	0.000853351	0.000103577
cg24389054	-0.00834581	0.00217441	0.00012794
cg23067299	0.00553992	0.00389109	0.154684
cg11902728	-0.00517	0.00135365	0.000138074
cg25212025	0.00753812	0.00149905	5.43723e-07
cg01873977	0.00934997	0.00231284	5.49323e-05
cg04517079	-0.00256544	0.00109111	0.0188156
cg18335991	0.00569468	0.00142996	7.07865e-05
cg01756424	-0.00545847	0.000864681	3.39504e-10
cg08472795	0.00521126	0.00139423	0.000191086
cg05824218	-0.00519198	0.00103243	5.4026e-07
cg25730428	-0.00716111	0.00137291	2.02674e-07
cg07826859	-0.00257685	0.00123727	0.0374143
cg00689360	0.00223489	0.0026344	0.396349
cg15212295	0.0166337	0.00189929	4.33779e-18
cg07339236	-0.0101556	0.00347034	0.00347062
cg19254163	0.000195505	0.00123706	0.874442
cg19918734	-0.0127297	0.00159968	3.0055e-15
cg12076915	0.000318826	0.00143061	0.82367
cg06595162	0.000390344	0.00136608	0.775108
cg15408734	0.00214784	0.00169094	0.204164
cg04044720	0.00597085	0.0018622	0.00136699
cg26707709	0.00560465	0.00315098	0.0754662
cg15342087	-0.0034159	0.00195011	0.0799939
cg02980249	-0.00317629	0.00113583	0.00522203
cg24681208	-0.00460837	0.00124224	0.0002134
cg03991871	0.00360461	0.00231076	0.118951
cg18642234	-0.0085252	0.00107992	4.8543e-15
cg13500388	-0.00337779	0.00158102	0.0327692
cg19593285	0.00908082	0.0022342	5.01167e-05
cg04359840	-0.000966923	0.00151002	0.52203
cg00563932	-0.00867115	0.00113339	3.1716e-14
cg03999941	0.0139889	0.00235571	3.42242e-09
cg03604011	-0.00566083	0.00518888	0.275429
cg12075928	0.0166747	0.00250989	4.00413e-11
cg10012530	-0.000371833	0.00158633	0.814701
cg14906103	-0.0152877	0.00163518	2.39141e-20
cg13832201	-0.00308597	0.00138083	0.0255425
cg00541303	0.00467037	0.00172038	0.0066921
cg13127741	0.0081134	0.0013598	2.88375e-09
cg23110422	0.00273893	0.00269423	0.309476
cg14012925	-0.00622724	0.00156516	7.19129e-05
cg17971600	-0.00377755	0.000840486	7.39918e-06
cg21140898	-0.00665716	0.00346342	0.0547392
cg20303561	0.00487125	0.00169745	0.0041531
cg21393163	0.00345431	0.0023246	0.137454
cg01208318	-0.00226726	0.00206707	0.27286
cg05673882	0.000667609	0.00189329	0.724414
cg19372602	-0.0133103	0.0021222	4.40509e-10
cg16276850	0.00446812	0.00128919	0.000540746
cg26764244	0.00406353	0.00236392	0.0857884
cg12758082	0.00797816	0.0010275	1.31847e-14
cg15892280	-0.00649012	0.000965455	2.35673e-11
cg23090529	0.00501445	0.00288682	0.0825489
cg04039397	0.0162641	0.00323676	5.51417e-07
cg00116430	-0.00756134	0.00158079	1.86605e-06
cg09109520	0.0104783	0.00165559	3.10842e-10
cg26337070	-0.0193757	0.00229769	6.90121e-17
cg10807309	-0.00163504	0.00145685	0.261877
cg12803068	-0.00328021	0.00255455	0.199303
cg12423733	-0.00825081	0.00354047	0.0198872
cg23351584	0.00364681	0.00200082	0.0685143
cg27598208	-0.00239539	0.00169836	0.15858
cg16834726	-0.011117	0.0014895	1.30441e-13
cg25212453	0.00483024	0.00313641	0.123714
cg22403782	0.00263492	0.00194072	0.174736
cg04521626	-0.00307686	0.0011111	0.0056751
cg00808648	-0.00610399	0.0014155	1.70318e-05
cg15159987	0.0144045	0.00120185	5.67824e-32
cg26282236	0.000222264	0.00140233	0.874084
cg02743070	-0.000516776	0.00126093	0.681972
cg23480021	-0.00535626	0.00444093	0.227934
cg19427338	-0.00828322	0.00176265	2.79703e-06
cg15600935	0.00840668	0.00275149	0.00228033
cg04039799	0.0109935	0.00127612	1.43786e-17
cg11263997	0.00575749	0.00244907	0.0188285
cg02985540	-0.00235604	0.00127913	0.0656447
cg07123182	-0.00919776	0.00429303	0.0322812
cg23781467	0.000912662	0.00122652	0.456906
cg00687135	0.00469001	0.0026014	0.0715638
cg03188382	0.000191099	0.00129046	0.882292
cg07626482	-0.00134174	0.001115	0.228994
cg08396193	-0.00565016	0.00232516	0.0151894
cg01901332	-0.00513762	0.00160912	0.00143206
cg07967717	-0.00240587	0.00133755	0.0722214
cg01062937	0.00649188	0.000954794	1.40187e-11
cg02657160	0.000688969	0.00229122	0.763678
cg12101586	0.00411172	0.0026485	0.120724
cg06648759	0.0031141	0.00140868	0.0271781
cg27286011	-0.00579286	0.00147756	9.1507e-05
cg17551891	-9.96349e-05	0.00229065	0.965311
cg02547394	0.0118538	0.00270996	1.2866e-05
cg05951221	-0.000278197	0.00167421	0.868045
cg04704634	-0.00101413	0.0015597	0.515635
cg03450842	-0.00197997	0.00119895	0.0988136
cg11436113	-0.00334465	0.00135816	0.0138793
cg08266095	-0.00302178	0.00187948	0.108055
cg15417641	-6.76107e-05	0.00276227	0.980475
cg09701700	-0.00741554	0.00131132	1.80813e-08
cg02375409	-0.000815716	0.00159794	0.609778
cg05906166	0.00894493	0.0022233	5.99378e-05
cg03194226	0.00427192	0.00192725	0.0267682
cg26361535	-0.00504989	0.00173875	0.00372585
cg13543915	0.00482082	0.00114348	2.60251e-05
cg10592592	0.00996458	0.00147895	2.15431e-11
cg27178191	1.16646e-05	0.000981957	0.990523
cg11071448	-0.011236	0.00193685	7.71268e-09
cg01692968	0.00463107	0.00229813	0.0440282
cg00533649	-0.00203942	0.00104022	0.0500899
cg09762515	0.00203478	0.00189403	0.28282
cg04324758	0.000990058	0.00379807	0.794372
cg24090911	-0.00330612	0.00264908	0.212177
cg07178945	0.000750623	0.00132548	0.571258
cg24230340	-0.00302876	0.00174778	0.0832838
cg18961281	0.00873695	0.0014163	8.39178e-10
cg25305703	-0.00141219	0.00246641	0.567005
cg08595501	0.000586168	0.00334629	0.860965
cg10919522	-0.000688326	0.00202923	0.734491
cg26703534	-0.0067984	0.00118187	1.02226e-08
cg00893603	0.00836411	0.00211811	8.15899e-05
cg23126342	-0.00285891	0.00259174	0.270132
cg01127300	-0.00465484	0.00130093	0.000355849
cg20483374	-8.70256e-05	0.00123481	0.943822
cg21611682	-0.00387527	0.00106399	0.00027747
cg19719391	0.00350227	0.0014622	0.0167067
cg00378510	-1.1569e-05	0.00222467	0.995851
cg26540191	-0.0067615	0.00397324	0.0889803
cg03636183	-0.00501772	0.0015946	0.00167794
cg22851561	0.0115546	0.0015837	4.37178e-13
cg03220447	0.00667745	0.00138874	1.64226e-06
cg27332104	-0.00663029	0.00153476	1.64215e-05
cg08038054	-0.00040548	0.00217095	0.851857
cg12876356	-0.0134645	0.00248201	6.58907e-08
cg25013095	-0.00149098	0.00429965	0.728806
cg13787850	0.00322268	0.00174913	0.0655662
cg07090714	-0.00893616	0.00160575	3.00197e-08
cg09247392	0.00565338	0.00133917	2.54126e-05
cg00295485	0.0112391	0.00167434	2.50537e-11
cg12303084	-0.00188308	0.00135625	0.165168
cg24838345	0.00151687	0.00338031	0.653673
cg00968616	-0.0164078	0.00120418	1.99337e-40
cg15059804	-0.0050537	0.00165414	0.00228308
cg19838043	-0.00216938	0.00136586	0.11239
cg16219322	0.00164075	0.00184468	0.373877
cg23230929	-0.00563825	0.00108286	2.13266e-07
cg07954423	0.00353741	0.00208165	0.0894184
cg05329352	0.00452206	0.00158044	0.00426877
cg13074055	-0.0038725	0.00383833	0.313154
cg02556928	-0.011621	0.00190416	1.26426e-09
cg21446172	-0.00355375	0.00149212	0.0173303
cg16116321	-0.00174075	0.00127427	0.172082
cg16178855	-0.000932338	0.00114257	0.414601
cg03004371	0.00828712	0.00201389	4.05083e-05
cg09935388	-0.0135102	0.00249872	7.26579e-08
cg19940644	-0.00714654	0.00199949	0.000360239
cg10691866	-0.00442584	0.00161593	0.00622733
cg27312979	-0.00788922	0.00194714	5.31628e-05
cg11430077	0.0120217	0.00264828	5.98858e-06
cg12126344	-0.00961634	0.00166581	9.1521e-09
cg10062919	-0.00206172	0.000839574	0.0141496
cg09465703	-0.00471098	0.00323848	0.145924
cg26703507	0.00690066	0.00194751	0.000404501
cg12474798	-0.0028064	0.00188805	0.137355
cg01272202	0.00532033	0.00160452	0.000930741
cg06819357	-0.00099935	0.00158582	0.528655
cg07381806	7.02785e-05	0.00332678	0.983148
cg24497361	0.00147081	0.00120993	0.224281
cg08757670	-0.00556605	0.00143717	0.000111231
cg26669717	-8.91134e-05	0.00116982	0.939286
cg15542713	0.0162481	0.00266205	1.26409e-09
cg01218206	0.0160331	0.00208575	2.41145e-14
cg01015663	-0.0204203	0.00149842	1.88315e-40
cg22100563	-0.0221781	0.00212242	6.95283e-25
cg24996979	-0.00344579	0.00147245	0.0193762
cg22635676	0.0162697	0.00573021	0.00457641
cg25197194	-0.000528891	0.00181167	0.770368
cg16062877	-0.000136769	0.00112135	0.902937
cg00210249	0.00448265	0.00200309	0.0253459
cg27467282	-0.00267714	0.00204338	0.1903
cg05677062	-0.00970325	0.00169299	1.15771e-08
cg15498134	0.00204725	0.00278922	0.463048
cg09084391	0.000991377	0.00339707	0.770446
cg03254067	-0.00274331	0.00189934	0.148806
cg11094248	-0.0144204	0.00127642	1.14556e-28
cg15963463	0.00352258	0.00146339	0.0161731
cg01763916	-0.0335496	0.00145383	5.09813e-104
cg06321596	0.000686953	0.00196137	0.726196
cg12513616	0.00629479	0.00123367	3.69277e-07
cg11701312	-0.000747396	0.000918388	0.415853
cg04858631	0.0212218	0.00236011	5.85215e-19
cg11390978	0.00115291	0.00427961	0.787655
cg27262054	0.00520844	0.00156993	0.000925417
cg24688690	-8.67784e-05	0.000955706	0.927661
cg06369322	0.0165532	0.00112534	1.70199e-46
cg04673446	0.00241762	0.00146251	0.0984901
cg19325791	-0.00901741	0.00207516	1.46446e-05
cg19744173	0.00230264	0.00130202	0.0771335
cg07029024	-0.005051	0.00189688	0.00781427
cg25317941	0.00211114	0.00140616	0.133436
cg25727671	-0.00880258	0.00339289	0.00954801
cg26850624	-0.00592906	0.00191609	0.00200574
cg13518625	-0.00331725	0.00495826	0.503554
cg17566560	0.00431319	0.0018467	0.01962
cg16611234	0.00765304	0.00221253	0.000554329
cg16151538	-0.0138975	0.00166598	1.41018e-16
cg04368724	0.00361293	0.00202095	0.0739785
cg14264316	0.0116579	0.00191913	1.50991e-09
cg26151910	-0.00243629	0.00239147	0.308456
cg26486070	-0.00503535	0.00162822	0.00201479
cg14254999	0.000278116	0.00308058	0.928074
cg00699986	-0.0185939	0.00175194	1.3656e-25
cg06688763	-0.00362705	0.0026555	0.172161
cg15700587	0.000875955	0.00199301	0.660341
cg03489965	-0.000944998	0.00190111	0.619192
cg07413467	-0.000103504	0.00173646	0.952476
cg01731783	0.0069582	0.000991815	3.18338e-12
cg06635952	-0.0021397	0.0013434	0.111379
cg17087741	-0.00151355	0.00433183	0.726829
cg20438687	-0.00543402	0.00159021	0.00064613
cg07986378	-0.01164	0.00276418	2.66612e-05
cg22356527	0.00147757	0.00204731	0.470563
cg01839993	0.0118673	0.00123691	2.72042e-21
cg13020466	-0.00349748	0.00169839	0.039604
cg01951879	-0.0017309	0.00235155	0.461781
cg24931658	-0.00146659	0.00128456	0.253719
cg16398761	-0.0186675	0.00391737	2.03021e-06
cg26196424	0.00194828	0.00212016	0.358246
cg14563949	-0.00150281	0.00117987	0.202923
cg09554443	0.0140419	0.00128097	3.97538e-27
cg07069636	0.001397	0.00105072	0.183822
cg09560590	0.00728549	0.00148107	9.45963e-07
cg04907244	-0.00498623	0.00228638	0.0293237
cg23576855	-0.0128867	0.002888	8.73808e-06
cg16519923	0.00852881	0.00157968	7.555e-08
cg04806562	0.00535627	0.0010671	5.65753e-07
cg12619504	-0.00428964	0.00124184	0.000564743
cg09848445	0.0043002	0.0041525	0.30054
cg26477856	0.0088594	0.00109039	7.99608e-16
cg24556382	0.0115563	0.00221184	1.93869e-07
cg23401251	-0.00414555	0.0016298	0.0110501
cg19859270	0.00555043	0.002733	0.0424092
cg19459791	0.00821852	0.00187124	1.18454e-05
cg11231349	0.00337326	0.00293523	0.250603
cg03399898	-0.000787127	0.00231255	0.733618
cg16255816	0.00524836	0.00150333	0.000492104
cg10874644	0.00552798	0.00313118	0.0776447
cg17668731	-0.00974318	0.00124536	8.55948e-15
cg14435720	4.91651e-05	0.00473092	0.991709
cg09658497	-0.0131297	0.00352461	0.000201366
cg06885459	-0.00456085	0.00143734	0.00153314
cg01207684	-0.0181362	0.00300509	1.90273e-09
cg08606254	0.00553453	0.00292102	0.058279
cg00336149	-0.00199959	0.00153682	0.193398
cg21473814	-0.00821114	0.00171071	1.71144e-06
cg18146737	-0.0167614	0.0067802	0.0135249
cg02583484	-0.00730221	0.00117787	7.00864e-10
cg20357806	0.00598864	0.00199581	0.00272967
cg06972908	0.0169552	0.00166517	9.8888e-24
cg04701628	-0.0132988	0.00122076	7.81702e-27
cg26718213	0.00406521	0.00238265	0.0881754
cg16201146	0.00224258	0.00169817	0.186798
cg25748521	0.00745397	0.00147386	4.66111e-07
cg13193840	-0.00541955	0.00423699	0.201024
cg20684110	-0.00282873	0.00184112	0.124616
cg15806304	-0.00251279	0.00134335	0.0615616
cg26844633	-0.00578475	0.00283396	0.0413656
cg03348792	0.00787105	0.00167563	2.82095e-06
cg08035323	0.00748793	0.00189918	8.36656e-05
cg21188533	0.00113294	0.00291936	0.698006
cg23441210	-0.0061623	0.00191067	0.00128126
cg11557553	0.00127988	0.00146415	0.382151
cg13428066	-0.00847194	0.00145987	7.63222e-09
cg13937905	0.0235914	0.00278924	5.37331e-17
cg22407942	-0.00746903	0.00182376	4.40575e-05
cg20295214	-0.00280232	0.00218492	0.199798
cg26364091	0.000226128	0.00122171	0.853177
cg26963277	-0.00595803	0.00280021	0.033491
cg10678215	0.0130916	0.00231046	1.68091e-08
cg08972170	-0.000267774	0.00210311	0.898698
cg10965178	-0.0115453	0.00142999	1.19048e-15
cg01481251	0.000333691	0.00325623	0.918388
cg25949550	-0.00127013	0.00169302	0.453217
cg14580211	-0.0124899	0.00160274	1.06526e-14
cg19816811	-0.00585542	0.00148523	8.39961e-05
cg24698211	-0.00275784	0.0015207	0.0699076
cg25921609	-0.0139062	0.00196129	1.87417e-12
cg20305005	-0.00183124	0.00179077	0.306625
cg10592478	0.0244268	0.00291922	1.14651e-16
cg09975715	0.00117547	0.00223312	0.598687
cg21869609	-0.00325864	0.00252189	0.196499
cg23842572	0.0244108	0.00165709	1.30819e-46
cg01744331	-0.00721835	0.00433953	0.0963977
cg16391678	0.0105154	0.0014391	4.02733e-13
cg08666707	-0.00144663	0.0012396	0.24335
cg22876908	0.00897666	0.00116382	2.00526e-14
cg23594345	-0.005053	0.00241896	0.0368513
cg25292882	0.00294711	0.00287025	0.304659
cg14817490	-0.0229941	0.00182322	4.87003e-35
cg26995224	0.000449231	0.00153692	0.770101
cg19089201	0.000818627	0.00395614	0.836092
cg02917867	-0.000139211	0.00131814	0.915902
cg10403394	-0.00441032	0.0023277	0.0583014
cg13038618	-0.00112324	0.00202878	0.579881
cg11225089	-0.0031886	0.0015304	0.0373388
cg10827488	0.00348467	0.00150681	0.0208496
cg03660377	0.0253749	0.0029589	2.01829e-17
cg10255761	-0.0033477	0.00127699	0.00882366
cg01097768	0.0047101	0.00172991	0.00653643
cg11666770	-0.000566111	0.00307753	0.854076
cg17333042	0.00182164	0.00106736	0.0880463
cg09469355	-0.000789853	0.00117932	0.503095
cg18900812	-0.00053012	0.00320152	0.868503
cg18295744	0.00224847	0.00137237	0.101509
cg02228160	0.0089251	0.00145328	1.00271e-09
cg26788216	-0.00395339	0.00178834	0.0271774
cg11207515	0.00436389	0.0024834	0.0790412
cg20066188	0.00933225	0.00147339	3.08248e-10
cg01294327	-0.00110465	0.00195718	0.572554
cg10750182	-0.00810496	0.000974752	1.72619e-16
cg11145461	-0.00607443	0.00249137	0.0148529
cg16880946	-0.00445092	0.00122538	0.000289461
cg00871371	0.00920297	0.00130061	2.07144e-12
cg08899667	-0.00604898	0.00125652	1.59956e-06
cg11197630	0.00787188	0.00335561	0.0190879
cg26878655	0.00424345	0.00198236	0.0324371
cg08386009	0.000808563	0.00106996	0.449927
cg09022230	-0.00795616	0.00155443	3.3955e-07
cg22937882	0.00182912	0.00174288	0.294091
cg03611151	-0.00358864	0.0017547	0.0409763
cg15636519	0.00257293	0.00287623	0.371144
cg13582060	-0.015543	0.00332263	3.10531e-06
cg08947774	-0.0113248	0.00169601	3.17174e-11
cg00324097	0.0113385	0.00101951	6.94475e-28
cg00911794	0.00708842	0.00256728	0.00581643
cg12806681	-0.00168675	0.00258342	0.513891
cg20873136	-0.00295123	0.00159206	0.0639361
cg14165660	-0.0026226	0.00166217	0.11477
cg05517711	-0.00286944	0.00101749	0.00484972
cg10179300	0.00686911	0.00225413	0.00233991
cg06294803	-0.00986931	0.00252575	9.64916e-05
cg06151964	-0.00342556	0.0011499	0.00292862
cg06394460	-0.0116457	0.00303653	0.000129524
cg06513247	0.0142147	0.000984498	6.35709e-45
cg19406367	0.00154223	0.00192511	0.423166
cg03415545	0.000658546	0.00328063	0.840925
cg02101876	0.016448	0.00333501	8.87176e-07
cg02556393	-0.000554309	0.00199145	0.780778
cg25421530	0.0144225	0.002574	2.40933e-08
cg01435643	-0.0120555	0.00220198	4.9932e-08
cg17814814	-0.00693443	0.00129178	8.9305e-08
cg02013841	0.00713404	0.00363476	0.0498305
cg06949439	0.0192111	0.00141768	8.04938e-40
cg10520740	0.000184119	0.00108937	0.865803
cg15482893	0.00648487	0.00205707	0.00164399
cg02782510	-0.000381214	0.00195349	0.8453
cg14093127	0.0127754	0.00243948	1.81182e-07
cg26790897	-0.00236622	0.00173205	0.172056
cg01856529	0.000945309	0.00212314	0.656197
cg05529343	-0.0143279	0.00364402	8.74664e-05
cg02186444	-0.00206623	0.00114806	0.0720611
cg14142087	0.00905126	0.00113612	2.77351e-15
cg12547807	0.00763071	0.00109652	4.6891e-12
cg10825315	0.0208349	0.00197254	2.2416e-25
cg19589396	0.00502512	0.0017581	0.0043065
cg08118908	0.00129994	0.00269414	0.629503
cg00073090	-0.0031959	0.00121136	0.00840012
cg01513913	-0.00424516	0.00117383	0.000307029
cg23973524	-0.00586215	0.00140995	3.36717e-05
cg13976502	-0.00291641	0.00118529	0.0139617
cg13525276	0.0242626	0.00226553	4.86577e-26
cg13039251	-0.00225569	0.00229505	0.325808
cg08149865	-0.00591898	0.00124485	2.13782e-06
cg25953130	0.0075836	0.00256457	0.00314397
cg00501876	0.00896966	0.00129054	5.00049e-12
cg05969150	-0.00286314	0.000935802	0.00224785
cg00976097	0.000169439	0.0050005	0.972974
cg23565821	0.0006179	0.00151632	0.683685
cg21161138	-0.00324157	0.00161663	0.0450875
cg17619755	-0.00276315	0.00180987	0.12701
cg11152412	-0.00955437	0.00207705	4.5086e-06
cg16936060	-0.0032672	0.00151012	0.0306229
cg14712058	0.0198336	0.00180002	2.01437e-27
cg24693803	0.00556859	0.00126304	1.09919e-05
cg12406027	-0.00179814	0.00107865	0.0956786
cg17038235	-0.0126687	0.00130925	1.19151e-21
cg16503724	0.0137562	0.00134115	4.55517e-24
cg26060489	0.00331054	0.0013781	0.0163931
cg09607043	0.0139559	0.00233372	2.65635e-09
cg12873476	-0.0018644	0.0014333	0.193509
cg00085013	-0.00286628	0.00140022	0.0407916
cg26529655	0.0077047	0.00144979	1.19878e-07
cg19211853	0.00978562	0.00666175	0.142018
cg02451831	-0.00153827	0.00164902	0.35102
cg06235438	0.017172	0.00180761	6.30144e-21
cg02775417	0.0126909	0.00459778	0.00583317
cg20059928	0.00136356	0.00149352	0.361383
cg10951873	0.00943033	0.0020309	3.66124e-06
cg25809905	-0.000236241	0.00160704	0.883147
cg16969872	0.00836039	0.00182553	4.95857e-06
cg19046189	0.000973033	0.00102184	0.341099
cg23667432	-0.00112931	0.00134833	0.402386
cg01005506	-0.000851378	0.00124855	0.495396
cg14074174	-0.000462105	0.000973496	0.635066
cg04956244	-0.00153219	0.000997672	0.124763
cg03345925	0.0102141	0.0014517	2.73976e-12
cg27537125	0.00674622	0.00137678	1.03882e-06
cg20902353	-0.00163138	0.00105358	0.121685
cg13784312	-0.0200437	0.00909019	0.0275783
cg11902777	0.002668	0.00270933	0.324878
cg21747070	0.0085281	0.0013685	5.75331e-10
cg17024919	0.00110509	0.00239288	0.644267
cg21566642	-0.00260035	0.00213109	0.22255
cg08763102	0.00364672	0.00136715	0.00770971
cg18754985	0.0053133	0.00336679	0.114708
cg22132788	-0.000434793	0.00428893	0.919265
cg03646329	0.0131332	0.00362717	0.000301449
cg14120703	-0.0107163	0.0010471	5.80211e-24
cg02336104	0.0037204	0.0013689	0.00663481
cg04813697	0.00820532	0.00187152	1.22689e-05
cg03519879	-0.0015293	0.00104606	0.143917
cg27449150	0.00853333	0.00185862	4.69333e-06
cg04573702	0.00336593	0.00128918	0.00910012
cg07465627	-0.000872877	0.00149709	0.55993
cg04970434	-0.00338964	0.00148418	0.0224895
cg04383058	0.0055436	0.00176033	0.00166281
cg16702313	0.00553887	0.00129241	1.91608e-05
cg23198793	0.00085198	0.00174018	0.624478
cg09578155	-0.00372501	0.000903524	3.90251e-05
cg10788371	-0.000839195	0.00118788	0.479992
cg20103692	-0.0164876	0.00246002	2.71897e-11
cg24741609	0.00841272	0.00133136	3.29607e-10
cg22539182	-0.000356609	0.00104554	0.733086
cg12836863	-0.0154431	0.00165455	2.83622e-20
cg14977938	-0.000805161	0.00147659	0.585622
cg06433467	0.00372921	0.00320546	0.244815
cg18991417	-0.00994468	0.00156274	2.45408e-10
cg05957567	0.00831745	0.00121899	1.1915e-11
cg02035751	0.0223443	0.00118588	9.28977e-73
cg19847577	0.00749147	0.0014313	1.85019e-07
cg01442064	0.00351727	0.00138292	0.0110568
cg15087369	0.00153739	0.00198194	0.438023
cg16983588	0.00295013	0.00183455	0.107986
cg14179389	-0.0131077	0.00263321	7.03197e-07
cg04258133	-0.00236471	0.00198661	0.234065
cg09099830	0.0011158	0.0012702	0.37982
cg24719910	-0.00154096	0.00319377	0.629517
cg04018738	-0.00619813	0.0027747	0.0256225
cg19825437	-0.00235517	0.00151246	0.119593
cg09570614	-0.0054436	0.00111102	1.04227e-06
cg24158160	-0.00142668	0.00178855	0.425163
cg21913886	-0.00445582	0.00205412	0.03019
cg00835193	-0.000470097	0.00230655	0.838524
cg23673974	0.00606684	0.00147807	4.22658e-05
cg01668352	0.000120372	0.00235907	0.959311
cg11253886	-0.00337252	0.00139915	0.0160353
cg18316974	-0.0173095	0.00582112	0.00298125
cg18625627	0.0221363	0.0023912	5.40558e-20
cg07063068	0.00604643	0.00379139	0.110928
cg26271591	-0.00145105	0.00279167	0.603279
cg10814005	-0.00112169	0.00217091	0.605431
cg24049493	0.011893	0.00265906	8.23292e-06
cg03316752	-0.00669615	0.00300606	0.0260299
cg05302489	0.000762893	0.00222216	0.731404
cg12729894	0.00110084	0.00135067	0.415156
cg03957124	0.0160375	0.00135317	2.65739e-31
cg11824827	0.0146185	0.00138588	2.54688e-25
cg14089503	0.0150981	0.00191025	4.56527e-15
cg19925780	0.00194165	0.00243282	0.424906
cg01017464	-0.00409563	0.00204945	0.0458142
cg22845855	0.00457212	0.00245564	0.0627715
cg22870429	0.00226045	0.0014955	0.130824
cg03109660	0.00835437	0.00155228	8.27941e-08
cg17924476	0.00322768	0.00171179	0.0595164
cg22891595	-0.00429027	0.00126799	0.000729939
cg01940273	-0.00244848	0.00156237	0.117248
cg04716530	0.00891051	0.0018153	9.97588e-07
cg11554391	0.000778209	0.00207347	0.707466
cg23233742	-0.00178049	0.00137219	0.194602
cg25648203	-0.0111557	0.00179416	6.17042e-10
cg14675361	0.000710707	0.00260058	0.784661
cg23219570	-0.0186741	0.0015167	1.38089e-33
cg22998476	-0.0107747	0.00137954	9.41708e-15
cg27405731	-0.0198364	0.00171063	4.32581e-30
cg11690578	-0.000544971	0.00198642	0.783846
cg20244340	0.00197809	0.00142793	0.166146
