# Supplementary material for: The dynamics of smoking-related disturbed methylation: a two time-point study of methylation change in smokers, non-smokers and former smokers
Source: BMC Genomics. 2017 Oct 18;18:805. doi: 10.1186/s12864-017-4198-0 (PMC6389045; doi:10.1186/s12864-017-4198-0)
Supplement: Supplementary file 5 — Previously examined associations with disease for CpG sites and genes found significant in the time since quitting analysis. Presented are the references for human diseases/conditions for which i) an association has been found with smoking and ii) an association has been found with a CpG site (or its gene or region) that was found significant in the longitudinal time since quitting analysis in this study. (XLS 59 kb) [file 12864_2017_4198_MOESM5_ESM.xls]

## Sheet: Sheet1
Disease	Paper detailing association	doi or PMID
Mortality	Association with smoking
	many
	Association with genetic locus identified in our study		Gene or locus	CpG (if applicable)
	AHRR (cg05575921) hypomethylation marks smoking behaviour, morbidity and mortality	10.1136/thoraxjnl-2016-208789	AHRR	cg05575921
Lung cancer (general) and small cell lung cancer	Association with smoking
	Many
	Association with genetic locus identified in our study		Gene or locus	CpG (if applicable)
	Functional vasopressin V1 type receptors are present in variant as well as classical forms of small-cell carcinoma.	PMID: 9357056	AVPR1B
	Tumour-specific arginine vasopressin promoter activation in small-cell lung cancer	10.1038/sj.bjc.6690623	AVPR1B
	DNA methylation changes measured in pre-diagnostic peripheral blood samples are associated with smoking and lung cancer risk	10.1002/ijc.30431	2q37.1	cg05951221
	DNA methylation changes measured in pre-diagnostic peripheral blood samples are associated with smoking and lung cancer risk	10.1002/ijc.30431	2q37.1	cg21566642
	Hypomethylation of smoking-related genes is associated with future lung cancer in four prospective cohorts	10.1038/ncomms10192	AHRR	cg05575921
	Smoking-associated DNA methylation markers predict lung cancer incidence	10.1186/s13148-016-0292-4	AHRR	cg05575921
	Role of LKB1-CRTC1 on glycosylated COX-2 and response to COX-2 inhibition in lung cancer.	10.1093/jnci/dju358	CRTC1
	F2RL3 methylation, lung cancer incidence and mortality.	10.1002/ijc.29537.	F2RL3
	Hypomethylation of smoking-related genes is associated with future lung cancer in four prospective cohorts	10.1038/ncomms10192	F2RL3	cg03636183
	Smoking-associated DNA methylation markers predict lung cancer incidence	10.1186/s13148-016-0292-4	F2RL3	cg03636183
Acute myeloid leukemia	Association with smoking
	Influence of cigarette smoking on the presentation and course of acute myeloid leukemia	10.1093/annonc/mdf269
	The relation between cigarette smoking and risk of acute myeloid leukemia: an updated meta-analysis of epidemiological studies.	10.1002/ajh.23744
	Intensity Of Smoking Increases The Odds Of Acute Myeloid Leukemia In Adult Smokers
	Association with genetic locus identified in our study		Gene or locus	CpG (if applicable)
	GFI1 as a novel prognostic and therapeutic factor for AML/MDS.	10.1038/leu.2016.11	GFI1
	A variant allele of Growth Factor Independence 1 (GFI1) is associated with acute myeloid leukemia	10.1182/blood-2009-08-239822	GFI1
	Transcription factor AP-2α regulates acute myeloid leukemia cell proliferation by influencing Hoxa gene expression.	10.1016/j.biocel.2013.04.024	HOXA7
	Inhibition of PCGF2 enhances granulocytic differentiation of acute promyelocytic leukemia cell line HL-60 via induction of HOXA7.	10.1016/j.bbrc.2011.10.152	HOXA7
Breast cancer	Association with smoking
	Active cigarette smoking and risk of breast cancer.	10.1002/ijc.29266
	The fraction of breast cancer attributable to smoking: The Norwegian women and cancer study 1991–2012	10.1038/bjc.2016.154
	Association with genetic locus identified in our study		Gene or locus	CpG (if applicable)
	Extracellular matrix signatures of human mammary carcinoma identify novel metastasis promoters.	10.7554/eLife.01308	SNED1
	Genome remodelling in a basal-like breast cancer metastasis and xenograft	10.1038/nature08989	SNED1
	SIN3A and SIN3B differentially regulate breast cancer metastasis	10.18632/oncotarget.12805	SIN3B
	ZNF668 functions as a tumor suppressor by regulating p53 stability and function in breast cancer	10.1158/0008-5472.CAN-11-0853	ZNF668
	Synaptojanin 2 is a druggable mediator of metastasis and the gene is overexpressed and amplified in breast cancer.	10.1126/scisignal.2005537	SYNJ2
			2q37.1
Heptacellular carcinoma	Association with smoking
	Smoking as an independent risk factor for hepatocellular carcinoma: the Singapore Chinese Health Study	10.1038/bjc.2011.360
	Impact of Cigarette Smoking on Outcome of Hepatocellular Carcinoma after Surgery in Patients with Hepatitis B	10.1371/journal.pone.0085077
	Association with genetic locus identified in our study		Gene or locus	CpG (if applicable)
	Genome-wide association study identifies 1p36.22 as a new susceptibility locus for hepatocellular carcinoma in chronic hepatitis B virus carriers.	10.1038/ng.638	1p36.22
Bladder cancer	Association with smoking
	Exercise Decreases and Smoking Increases Bladder Cancer Mortality	10.1016/j.clgc.2016.11.006
	Quantified relations between exposure to tobacco smoking and bladder cancer risk: a meta-analysis of 89 observational studies	10.1093/ije/dyw044
	Association with genetic locus identified in our study		Gene or locus	CpG (if applicable)
	Mapping of the UGT1A locus identifies an uncommon coding variant that affects mRNA expression and protects from bladder cancer	10.1093/hmg/ddr619	2q37.1
Colorectal cancer	Association with smoking
	Cigarette smoking and colorectal cancer risk in Germany: a population-based case-control study	10.1002/ijc.21875
	A prospective study of cigarette smoking and risk of colorectal adenoma and colorectal cancer in U.S. men	PMID: 8283490
	Association with genetic locus identified in our study		Gene or locus	CpG (if applicable)
	The Role of Chromosomal Instability and Epigenetics in Colorectal Cancers Lacking β-Catenin/TCF Regulated Transcription	10.1155/2016/6089658	2p25.1
Cervival cancer	Association with smoking
	Smoking and Cervical Cancer	10.5402/2011/847684
	How Does Tobacco Smoke Contribute to Cervical Carcinogenesis?	10.1128/JVI.00103-08
	Association with genetic locus identified in our study		Gene or locus	CpG (if applicable)
	1p36.22 region containing PGD gene is frequently gained in human cervical cancer	10.1111/jog.12193	1p36.22
Gastric cancer	Association with smoking
	Gastric cancer: prevention, risk factors and treatment	PMCID: PMC4017429
	Association with genetic locus identified in our study		Gene or locus	CpG (if applicable)
	Loss of fragile histidine triad and amplification of 1p36.22 and 11p15.5 in primary gastric adenocarcinomas	10.3748/wjg.v18.i33.4522	1p36.22
Prostate cancer	Association with smoking
	Smoking as a Risk Factor for Prostate Cancer: A Meta-Analysis of 24 Prospective Cohort Studies	10.2105/AJPH.2008.150508
	Association with genetic locus identified in our study		Gene or locus	CpG (if applicable)
	Combined overexpression of HIVEP3 and SOX9 predicts unfavorable biochemical recurrence-free survival in patients with prostate cancer.	10.2147/OTT.S55432	HIVEP3
	Identification of inactivating mutations in the JAK1, SYNJ2, and CLPTM1 genes in prostate cancer cells using inhibition of nonsense-mediated decay and microarray analysis.	10.1016/j.cancergencyto.2005.02.006	SYNJ2
Esophageal adenocarcinoma	Association with smoking
	Cigarette smoking and adenocarcinomas of the esophagus and esophagogastric junction: a pooled analysis from the international BEACON consortium.	10.1093/jnci/djq289
	Association with genetic locus identified in our study		Gene or locus	CpG (if applicable)
	Single nucleotide polymorphisms in CRTC1 and BARX1 are associated with esophageal adenocarcinoma	10.4103/1477-3163.157441	CTRC1
Pancreatic cancer	Association with smoking
	Smoking induced pancreatitis and pancreatic cancer.	10.3998/panc.2015.25
	Association with genetic locus identified in our study		Gene or locus	CpG (if applicable)
	Senescence-associated SIN3B promotes inflammation and pancreatic cancer progression.	10.1172/JCI72619	SIN3B
Cancer (general, other)	Association with smoking
	Many
	Association with genetic locus identified in our study		Gene or locus	CpG (if applicable)
	Identification of AXUD1, a novel human gene induced by AXIN1 and its reduced expression in human carcinomas of the lung, liver, colon and kidney.	10.1038/sj.onc.1204603	CSRNP1
	The aryl hydrocarbon receptor repressor is a putative tumor suppressor gene in multiple human cancers.	10.1172/JCI30024	AHRR
	Molecular signature of salivary gland tumors: potential use as diagnostic and prognostic marker	10.1111/jop.12329	CTRC1
	Genomic profiles and CRTC1-MAML2 fusion distinguish different subtypes of mucoepidermoid carcinoma	10.1038/modpathol.2012	CTRC1
	Emerging Roles of Epigenetic Regulator Sin3 in Cancer.	10.1016/bs.acr.2016.01.006	SIN3B
Parkinson's	Association with smoking
	Parkinson's Disease Risks Associated with Cigarette Smoking, Alcohol Consumption, and Caffeine Intake	10.1093/aje/155.8.732
	Cigarette smoking in Parkinson's disease: influence on disease progression.	10.1002/mds.20117
	Association with genetic locus identified in our study		Gene or locus	CpG (if applicable)
	Investigation of the PARK10 gene in Parkinson disease.	10.1111/j.1469-1809.2007.00353.x	HIVEP3
	Association mapping of the PARK10 region for Parkinson's disease susceptibility genes.	10.1016/j.parkreldis.2013.10.001	HIVEP3
	Genetic variability in the mitochondrial serine protease HTRA2 contributes to risk for Parkinson disease.	10.1002/humu.20713.	HTRA2
	Loss of function mutations in the gene encoding Omi/HtrA2 in Parkinson's disease	10.1093/hmg/ddi215	HTRA2
	Mitochondrial Stress Signalling: HTRA2 and Parkinson's Disease	10.1155/2012/607929	HTRA2
Personality and cognition (depression, aggression, etc.)	Association with smoking
	Cigarette smoking and depression: a question of causation	10.1192/bjp.bp.109.074880
	Maternal prenatal smoking, parental antisocial behavior, and early childhood physical aggression	10.1017/S0954579408000217
	Smoking History and Nicotine Effects on Cognitive Performance	10.1016/S0893-133X(01)00257-3
	Impact of smoking on cognitive decline in early old age: the Whitehall II cohort study	10.1001/archgenpsychiatry.2011.2016
	Association with genetic locus identified in our study		Gene or locus	CpG (if applicable)
	Association between a polymorphism of the vasopressin 1B receptor gene and aggression in children.	10.1097/YPG.0000000000000036	AVPR1B
	Family-based study of AVPR1B association and interaction with stressful life events on depression and anxiety in suicide attempts	10.1038/npp.2013.49.	AVPR1B
	Evolutionary conserved longevity genes and human cognitive abilities in elderly cohorts.	10.1038/ejhg.2011.201	SYNJ2
	Longevity candidate genes and their association with personality traits in the elderly	10.1002/ajmg.b.32013	SYNJ2
Rheumatoid arthritis	Association with smoking
	Heavy cigarette smoking is strongly associated with rheumatoid arthritis (RA), particularly in patients without a family history of RA	10.1136/ard.60.3.223
	Association with genetic locus identified in our study		Gene or locus	CpG (if applicable)
	Association of CD247 Polymorphisms with Rheumatoid Arthritis: A Replication Study and a Meta-Analysis	10.3390/ijms151222279	CD247
	TCR-CD3ζ gene polymorphisms and expression profile in rheumatoid arthritis	10.1080/08916934.2016.1174855	CD247
Body mass index	Association with smoking
	The association of smoking and demographic characteristics on body mass index and obesity among adults in the U.S., 1999–2012	10.1186/s40608-014-0018-0
	Relationship between Smoking and Obesity: A Cross-Sectional Study of 499,504 Middle-Aged Adults in the UK General Population	10.1371/journal.pone.0123579
	Association with genetic locus identified in our study		Gene or locus	CpG (if applicable)
	Epigenome-wide association study (EWAS) of BMI, BMI change and waist circumference in African American adults identifies multiple replicated loci	10.1093/hmg/ddv161	CD247	cg09554443
	An epigenome-wide study of body mass index and DNA methylation in blood using participants from the Sister Study cohort	10.1038/ijo.2016.184	CD247	cg09554443
	Epigenome-wide association study (EWAS) of BMI, BMI change and waist circumference in African American adults identifies multiple replicated loci	10.1093/hmg/ddv161	AHRR	cg23576855
Male infertility	Association with smoking
	Smoking and Male Infertility: An Evidence-Based Review	10.5534/wjmh.2015.33.3.143
	The Effects of Cigarette Smoking on Male Fertility	10.1080/00325481.2015.1015928
	Association with genetic locus identified in our study		Gene or locus	CpG (if applicable)
	Association of male infertility with Pro185Ala polymorphism in the aryl hydrocarbon receptor repressor gene: implication for the susceptibility to dioxins.	10.1016/j.fertnstert.2004.06.027	AHRR
	The contribution of genetic variations of aryl hydrocarbon receptor pathway genes to male factor infertility	10.1016/j.fertnstert.2006.12.041	AHRR
Atherosclerosis	Association with smoking
	The pathophysiology of cigarette smoking and cardiovascular disease: An update	10.1016/j.jacc.2003.12.047
	Association with genetic locus		Gene or locus	CpG (if applicable)
	DNA Methylation of the Aryl Hydrocarbon Receptor Repressor Associations With Cigarette Smoking and Subclinical Atherosclerosis.	10.1161/CIRCGENETICS.115.001097	AHRR	cg05575921
Inflammatory bowel disease	Association with smoking
	Role of smoking in inflammatory bowel disease: implications for therapy	10.1136/pmj.76.895.273
	Smoking and Inflammatory Bowel Disease: A Meta-analysis	10.4065/81.11.1462
	Association with genetic locus identified in our study		Gene or locus	CpG (if applicable)
	A genome-wide scan of Ashkenazi Jewish Crohn's disease suggests novel susceptibility loci.	10.1371/journal.pgen.1002559	CPAMD8
	G Protein-coupled pH-sensing Receptor OGR1 Is a Regulator of Intestinal Inflammation.	10.1097/MIB.0000000000000375	GRP68
	The pH-sensing receptor OGR1 improves barrier function of epithelial cells and inhibits migration in an acidic environment	10.1152/ajpgi.00408.2014	GRP68
Osteoporosis	Association with smoking
	The effects of smoking on bone health	10.1042/CS20060173
	Association with genetic locus identified in our study		Gene or locus	CpG (if applicable)
	LRP5, low-density-lipoprotein-receptor-related protein 5, is a determinant for bone mineral density	10.1007/s10038-003-0111-6	LRP5
	The role of cigarette smoking and statins in the development of postmenopausal osteoporosis: a pilot study utilizing the Marshfield Clinic Personalized Medicine Cohort	10.1007/s00198-009-0981-3	LRP5
	Polymorphisms in the low-density lipoprotein receptor-related protein 5 (LRP5) gene are associated with variation in vertebral bone mass, vertebral bone size, and stature in whites.	10.1086/420771	LRP5
Aging	Association with smoking
	Association with genetic locus identified in our study		Gene or locus	CpG (if applicable)
	DNA methylation age of human tissues and cell types.	10.1186/gb-2013-14-10-r115	HTRA2; GPR68
