# Supplementary material for: The dynamics of smoking-related disturbed methylation: a two time-point study of methylation change in smokers, non-smokers and former smokers
Source: BMC Genomics. 2017 Oct 18;18:805. doi: 10.1186/s12864-017-4198-0 (PMC6389045; doi:10.1186/s12864-017-4198-0)
Supplement: Supplementary file 10 — All results of the analysis of longitudinal effect of continued smoking. The longitudinal regression coefficients represent the rate of change of methylation M-value per year from baseline to follow-up for continued smokers relative to never smokers. The cross-sectional coefficients represent the methylation M-value difference to never smokers at baseline. Also presented are the results for the time coefficient from the model. “Chromosome” is the chromosome of the CpG site and “Gene or region” is based on the annotation file provided by Illumina (HumanMethylation450 v1.2 Manifest File). (XLS 179 kb) [file 12864_2017_4198_MOESM10_ESM.xls]

## Sheet: Table S7 Continued smoking all 
CpG site	Cross-sectional coefficient	Cross-sectional coefficient SE	Cross-sectional coefficient pvalue	Time coefficient	Time coefficient SE	Time coefficient pvalue	Longitudinal coefficient	Longitudinal coefficient SE	Longitudinal coefficient pvalue	Number of observations in model	Chromosome	Gene or position
cg09469355	-0.0958627	0.0171876	3.02789e-08	-0.000346466	0.00131191	0.791749	-0.00138173	0.00192829	0.473858	1589	1	SKI
cg08884752	-0.0781771	0.0193007	5.41792e-05	0.010607	0.00162933	1.06134e-10	-0.00650454	0.00254377	0.0107428	1582	1	SKI
cg12547807	-0.151214	0.0159076	1.06079e-20	0.00747428	0.00124198	2.28208e-09	-0.000905028	0.00183971	0.6229	1588	1	1p36.22
cg04885881	-0.262032	0.0272102	4.36121e-21	0.000575039	0.00179979	0.749399	-0.0078979	0.00246569	0.00141553	1590	1	1p36.22
cg19940644	-0.199348	0.032403	1.07148e-09	-0.00673669	0.00226321	0.00296936	-0.00393785	0.00317113	0.214692	1588	1	1p36.22
cg12126344	-0.11606	0.0193531	2.56825e-09	-0.00958518	0.00179498	1.10253e-07	0.00370508	0.0029981	0.216909	1524	1	1p36.22
cg21393163	-0.27822	0.0373557	1.91441e-13	0.00353079	0.00261461	0.177125	-0.00709398	0.00366996	0.0535987	1582	1	1p36.22
cg16047567	-0.209314	0.0253163	4.09888e-16	0.0100749	0.00163529	9.77393e-10	-0.00563286	0.00222298	0.0114732	1584	1	DHRS3
cg07180646	-0.180321	0.0268548	3.19262e-11	-0.00481047	0.00151384	0.00152386	-0.00514828	0.00195243	0.00853378	1588	1	TMEM51
cg21913886	-0.250905	0.0316054	4.90037e-15	-0.00396577	0.00231063	0.0863413	0.000461758	0.00331285	0.889183	1590	1	TMEM51
cg01832549	-0.104365	0.0225573	4.19686e-06	0.00252912	0.00137674	0.0664524	-0.00468355	0.00183027	0.0106856	1590	1	CAPZB
cg19713429	-0.149867	0.0254465	5.1206e-09	0.0013103	0.0018287	0.473798	-0.00664662	0.00260233	0.0108338	1587	1	CAPZB
cg01015663	-0.093275	0.0198213	2.80829e-06	-0.019903	0.00165011	7.06461e-32	-0.00302226	0.00254904	0.236121	1589	1	TCEA3
cg03611151	0.115286	0.0227194	4.45955e-07	-0.00449104	0.00193193	0.020241	-0.00184171	0.00302381	0.542655	1582	1	CNR2
cg07967717	0.100599	0.0190571	1.54615e-07	-0.00219613	0.00149668	0.142522	-0.00365466	0.00223033	0.101703	1590	1	CNR2
cg26856289	-0.119119	0.0206698	1.03025e-08	0.00673424	0.00178312	0.000165914	-0.00939058	0.00280463	0.000851791	1582	1	SFRS13A
cg15498134	-0.226741	0.0334961	1.91592e-11	0.00245014	0.00303938	0.420313	0.00578861	0.00497569	0.245033	1582	1	RUNX3
cg15963463	-0.0849891	0.0187494	6.37684e-06	0.0038123	0.00156189	0.0147835	0.00277991	0.00241315	0.249686	1581	1	RUNX3
cg10951873	-0.130444	0.0243608	1.00547e-07	0.0103063	0.00219035	2.80118e-06	-0.00118168	0.00355091	0.739386	1582	1	RUNX3
cg27537125	-0.232971	0.0171153	1.46941e-39	0.00742327	0.00148327	6.34303e-07	-0.000696404	0.00234371	0.766441	1588	1	1p36.11
cg15482893	0.13093	0.0259097	4.9516e-07	0.00680125	0.00225009	0.00255368	0.00187941	0.00359092	0.600859	1583	1	BSDC1
cg15059804	0.171864	0.0314328	5.74963e-08	-0.00530937	0.00189916	0.00526344	-0.0033195	0.00251978	0.1881	1585	1	ZNF362
cg16815882	0.118558	0.015443	3.06561e-14	-0.0176622	0.00140963	4.19597e-34	-0.00728692	0.00231115	0.00167845	1586	1	KIAA0319L
cg01763916	-0.107104	0.017346	8.70817e-10	-0.0341956	0.00158913	3.16424e-88	-0.0029978	0.00260645	0.250435	1582	1	SMAP2
cg15542713	0.326229	0.04482	6.63788e-13	0.0142809	0.0028826	8.28407e-07	0.00469655	0.00390524	0.229486	1583	1	HIVEP3
cg16145216	0.274923	0.0314365	9.68887e-18	0.00723974	0.00173385	3.20192e-05	-0.00666286	0.00223013	0.00289937	1585	1	HIVEP3
cg24049493	0.450331	0.0543586	3.9486e-16	0.00731118	0.00293314	0.0128233	0.000285659	0.00375852	0.939436	1590	1	HIVEP3
cg10965178	-0.109873	0.0208683	1.66631e-07	-0.0111781	0.00160048	4.52102e-12	0.00187231	0.00235138	0.426122	1587	1	TIE1
cg23090529	-0.258095	0.039338	7.93599e-11	0.00888112	0.00315235	0.00491636	-0.00891946	0.00479042	0.0629892	1557	1	1p32.3
cg21140898	-0.314859	0.0490683	1.99656e-10	-0.0051943	0.00388243	0.181163	-0.0113556	0.00583866	0.0521486	1566	1	1p32.3
cg24741609	-0.136901	0.0216392	3.66739e-10	0.00915824	0.00149353	1.1614e-09	-0.000450583	0.00205188	0.826245	1565	1	GLIS1
cg19406367	0.173734	0.0313146	3.63522e-08	0.000805042	0.00216044	0.709487	0.00161317	0.00300107	0.591056	1583	1	SGIP1
cg13184736	-0.339226	0.0558696	1.80437e-09	0.00642739	0.00332208	0.0532672	-0.019009	0.00434084	1.36037e-05	1566	1	GNG12
cg13399816	-0.166496	0.0287788	9.69541e-09	0.00407776	0.0017147	0.0175611	-0.00863493	0.00227618	0.000160133	1583	1	GNG12
cg25189904	-0.507103	0.0396733	8.58109e-35	0.00443014	0.00242243	0.0676775	-0.0157743	0.00323022	1.26483e-06	1588	1	GNG12
cg26764244	-0.308164	0.0408529	9.84087e-14	0.00488731	0.00271733	0.0723277	-0.00713868	0.00373589	0.0563911	1587	1	GNG12
cg09662411	-0.260996	0.0323934	1.93919e-15	-0.0124217	0.00242017	3.28954e-07	0.00923024	0.00351794	0.00886594	1589	1	GFI1
cg18146737	-1.18692	0.117952	9.4879e-23	-0.00516543	0.00708896	0.466357	0.00815053	0.00936344	0.384321	1575	1	GFI1
cg12876356	-0.463527	0.0438181	6.85726e-25	-0.00946417	0.00277799	0.000678862	0.00518736	0.00376675	0.168869	1583	1	GFI1
cg18316974	-0.734918	0.0872009	1.07171e-16	-0.0135404	0.00645751	0.0362024	0.00108528	0.00917756	0.905898	1561	1	GFI1
cg09935388	-0.572613	0.0434908	1.08308e-36	-0.0119449	0.002766	1.69937e-05	-0.00465476	0.00373159	0.212632	1587	1	GFI1
cg14179389	-0.229548	0.043937	2.09302e-07	-0.0115789	0.00306376	0.000164523	0.000688577	0.0042997	0.872808	1586	1	GFI1
cg00116430	-0.146749	0.0289592	4.77749e-07	-0.00382263	0.00183193	0.0371274	-0.00457677	0.00248227	0.0655969	1580	1	1p22.1
cg19925780	0.124241	0.0311885	7.17222e-05	0.00163004	0.0026396	0.536989	0.000206495	0.00410773	0.95992	1586	1	1p21.2
cg27449150	-0.121735	0.022928	1.28549e-07	0.00952954	0.00203376	3.07706e-06	-0.00082933	0.0032735	0.800067	1589	1	1p12
cg03399898	-0.272777	0.0439663	8.06757e-10	-0.000703632	0.00259456	0.786289	0.00307148	0.00341752	0.369071	1573	1	1q21.2
cg24158160	0.0882289	0.0190546	3.97354e-06	-0.00276462	0.00186068	0.137574	0.00044118	0.00315756	0.888916	1584	1	C1orf230
cg19372602	-0.112805	0.0254425	1.00034e-05	-0.0126791	0.00229272	3.85188e-08	-0.00718586	0.00373382	0.0546475	1583	1	1q22
cg11231349	-0.160264	0.0369378	1.54444e-05	0.00262686	0.00316011	0.405978	-0.00446601	0.0049589	0.368074	1583	1	NOS1AP
cg09554443	0.116065	0.0227362	3.93006e-07	0.0141429	0.00148877	1.0424e-20	0.00195678	0.0020283	0.334975	1589	1	CD247
cg11145461	-0.135368	0.0293354	4.30334e-06	-0.00387605	0.00270248	0.151738	0.00292687	0.00446646	0.512466	1582	1	CSRP1
cg11071448	-0.109183	0.0217481	5.80282e-07	-0.00980731	0.00206072	2.16149e-06	-0.00532869	0.00346898	0.124917	1586	1	SYT2
cg08709672	-0.24082	0.01981	5.53116e-32	-0.00567544	0.0013854	4.45725e-05	0.00638788	0.00193919	0.00103186	1586	1	AVPR1B
cg20295214	-0.188561	0.0254484	2.15563e-13	-0.00202458	0.00240353	0.399753	-0.00330884	0.0040335	0.412268	1586	1	AVPR1B
cg06949439	-0.0853377	0.0231251	0.000235007	0.0187595	0.00161586	1.39952e-29	-0.00121558	0.00229597	0.596662	1507	1	RASSF5
cg02035751	-0.0554857	0.0147834	0.000182123	0.0221884	0.00130077	3.91319e-59	-0.000397157	0.00208208	0.848771	1586	1	RASSF5
cg00541303	-0.11952	0.0231007	2.66185e-07	0.00587215	0.00192786	0.00236487	-0.0059235	0.00299832	0.0485477	1585	1	1q32.2
cg17814814	0.0812644	0.0158325	3.27352e-07	-0.00686353	0.00141803	1.45054e-06	-0.00121593	0.0022908	0.595719	1582	1	1q41
cg21446172	-0.158732	0.0208826	5.83382e-14	-0.00238821	0.00168418	0.156417	0.00324429	0.00255293	0.204175	1589	1	CAPN8
cg15087369	0.113758	0.0251044	6.38556e-06	0.00110963	0.00221427	0.616365	-0.000577626	0.00354779	0.870708	1587	1	1q42.12
cg03547355	-0.08894	0.0167146	1.21123e-07	0.00346343	0.00145275	0.0172622	-0.00729264	0.00231296	0.00167725	1588	1	1q42.13
cg11229399	0.229359	0.0301681	6.11046e-14	0.00409212	0.00219067	0.0619917	-0.00910769	0.00312741	0.00369126	1587	1	1q42.13
cg21486510	0.0763763	0.0156271	1.14405e-06	-0.01358	0.00139915	1.47549e-21	-0.00576936	0.00227412	0.0113783	1586	2	RNF144A
cg23079012	-0.886589	0.0527948	4.34013e-57	-0.0231505	0.00427617	7.31756e-08	0.038697	0.00649139	3.8171e-09	1583	2	2p25.1
cg14093127	-0.192871	0.0350274	4.49009e-08	0.00977488	0.00272401	0.000344839	-0.00209675	0.00404068	0.60397	1585	2	2p25.1
cg08035323	0.343464	0.0338591	4.21346e-23	0.00945153	0.00211438	8.55247e-06	-0.00234639	0.00282792	0.406951	1585	2	2p25.1
cg23401251	0.1134	0.0198218	1.30729e-08	-0.00391673	0.00174962	0.0253465	-0.00257733	0.00279583	0.356892	1580	2	IFT172
cg19427338	0.167458	0.0253197	5.67202e-11	-0.00814487	0.0019784	4.08032e-05	-0.00504115	0.00294008	0.0868163	1576	2	2p21
cg11253886	0.152883	0.0253098	2.14566e-09	-0.00410272	0.00159775	0.0103534	0.000268128	0.00214574	0.900589	1583	2	2p21
cg06635952	0.143818	0.0183248	9.09249e-15	-0.0016206	0.00148794	0.276282	0.00230815	0.00226866	0.309275	1587	2	ANXA4
cg15408734	-0.0892088	0.0210145	2.33874e-05	0.0026043	0.00182431	0.153653	-0.00631152	0.0028885	0.0291783	1588	2	2p13.3
cg24230340	-0.14932	0.0303724	1.02322e-06	-0.00104363	0.00197495	0.597293	0.00399436	0.00269023	0.138012	1581	2	HTRA2
cg26337070	-0.254313	0.0427166	3.60357e-09	-0.0175265	0.00270781	1.39656e-10	-0.00663814	0.0036384	0.0684684	1586	2	ATOH8
cg23230929	0.0973291	0.0168298	9.53391e-09	-0.00446464	0.00120051	0.000208648	0.00220646	0.00169376	0.193062	1586	2	2p11.2
cg26788216	-0.105564	0.0248533	2.32482e-05	-0.00365992	0.00201583	0.0696568	-0.00216506	0.00306174	0.479692	1590	2	IL1RL2
cg00295485	-0.122447	0.0226985	8.21663e-08	0.0115679	0.0018649	7.37054e-10	-0.0038452	0.00285245	0.178034	1587	2	UXS1
cg09570614	0.115529	0.0170438	1.96551e-11	-0.00425727	0.0012286	0.000547301	-0.000251253	0.00174929	0.885828	1589	2	2q13
cg19744173	0.121382	0.0175942	8.2851e-12	0.00188232	0.0014676	0.19986	-0.00246814	0.00225534	0.274136	1585	2	FBLN7
cg26703507	-0.120311	0.0260437	4.24971e-06	0.00909183	0.00212579	2.02994e-05	-0.00397377	0.00322648	0.218465	1586	2	SLC20A1
cg20873136	0.104221	0.018809	3.58522e-08	-0.00291181	0.00175645	0.0976004	-0.00160806	0.00290268	0.579742	1578	2	HS6ST1
cg08472795	-0.0824874	0.0177231	3.58653e-06	0.0056583	0.00150938	0.000185287	-0.00536873	0.00236841	0.0236724	1586	2	HS6ST1
cg10012530	-0.107654	0.019213	2.54128e-08	0.00156233	0.00174206	0.369973	0.00568733	0.00284317	0.0458064	1586	2	HS6ST1
cg20305005	0.114324	0.0242057	2.5872e-06	-0.00123094	0.00200956	0.540283	-0.00241253	0.00309179	0.43545	1584	2	SCN2A
cg26271591	-0.276632	0.0339472	8.27085e-16	0.00319713	0.00306121	0.296492	0.000468705	0.00496994	0.924889	1576	2	NFE2L2
cg15636519	-0.153472	0.0322954	2.21521e-06	0.00391364	0.00307278	0.203017	0.00310236	0.00515878	0.547766	1579	2	STAT4
cg16116321	-0.114535	0.0217215	1.62744e-07	-0.000682932	0.001448	0.637266	-0.00247947	0.00196614	0.207656	1584	2	FAM124B
cg14254999	-0.126536	0.0341005	0.000214325	0.0001851	0.00337016	0.956208	0.00614841	0.00586582	0.294878	1569	2	GPR55
cg19827923	-0.149251	0.0146599	1.54826e-23	0.00118436	0.00135723	0.383026	0.00800786	0.00225145	0.000397827	1585	2	GPR55
cg25013095	-0.221475	0.045401	1.18229e-06	0.000984036	0.00459853	0.830591	0.0112015	0.00816653	0.170562	1580	2	2q37.1
cg23667432	-0.104985	0.0150179	4.19886e-12	-0.000767216	0.00143625	0.593311	-0.0007623	0.00241379	0.752231	1555	2	ALPP
cg03188382	-0.143449	0.0205977	5.68331e-12	0.00160637	0.00144376	0.266087	0.00344592	0.00206354	0.0953545	1533	2	ALPP
cg22403782	-0.239157	0.0394172	1.84918e-09	0.00405715	0.00226423	0.0734172	0.00521871	0.00295373	0.077647	1588	2	ALPP
cg19713851	-0.351353	0.053923	1.14406e-10	0.0127731	0.00320639	7.20186e-05	-0.0137995	0.00420091	0.00106569	1582	2	ALPP
cg27241845	-0.269344	0.0234064	4.05057e-29	0.00394836	0.00181579	0.0298477	-0.00687275	0.00269677	0.0110089	1588	2	2q37.1
cg25560398	-0.180519	0.0174205	2.4335e-24	-0.000219335	0.00169699	0.89718	0.00945478	0.00292701	0.00128808	1579	2	ECEL1P2
cg17087741	-0.382818	0.0496839	2.50639e-14	-0.00163765	0.00457803	0.720611	-0.00761936	0.00753207	0.312054	1553	2	2q37.1
cg03329539	-0.337139	0.0215644	1.78014e-50	0.00116772	0.00179039	0.514374	-0.00748352	0.00276393	0.00692724	1587	2	2q37.1
cg06644428	-0.747288	0.0575593	2.87698e-36	0.00722324	0.00479935	0.132549	0.0182223	0.00742269	0.0143063	1587	2	2q37.1
cg05951221	-0.733178	0.0284782	4.9425e-114	9.42158e-05	0.00190265	0.960514	0.00414271	0.00262244	0.114577	1585	2	2q37.1
cg21566642	-1.07831	0.0361934	7.10358e-142	-0.000644607	0.00237878	0.786451	-0.000926541	0.00324412	0.775256	1578	2	2q37.1
cg01940273	-0.66938	0.0247086	1.05746e-123	-0.00132095	0.00169361	0.435559	5.33436e-05	0.00235891	0.981964	1589	2	2q37.1
cg13193840	-0.312588	0.0451708	6.66337e-12	-0.00395939	0.00451105	0.380271	-0.00668109	0.00788603	0.397136	1570	2	2q37.1
cg25317941	0.0721626	0.0153801	2.95361e-06	0.00223293	0.00150683	0.138623	-0.00284851	0.00260671	0.274832	1587	2	ECEL1
cg26707709	0.38759	0.0645717	2.73623e-09	0.00802966	0.00365262	0.0281253	-0.0102104	0.0047612	0.0323017	1586	2	SNED1
cg22635676	0.6094	0.124488	1.15258e-06	0.0147916	0.00658823	0.024955	-0.00995047	0.00843318	0.238393	1584	2	SNED1
cg26718213	0.293608	0.0590207	7.79222e-07	0.00608029	0.00278614	0.0293142	-0.00294769	0.00344538	0.392522	1549	2	SNED1
cg00085013	0.0892492	0.0178844	6.83126e-07	-0.00211953	0.00156739	0.176521	-0.000933638	0.00249757	0.708641	1582	3	FGD5
cg16503724	0.118584	0.0172127	8.70708e-12	0.0144266	0.00148428	1.2813e-21	0.00092131	0.00234197	0.694138	1585	3	PLCL2
cg17024919	-0.325556	0.0509652	2.62603e-10	0.00198402	0.00271635	0.465299	0.000995388	0.00346093	0.773724	1589	3	ZNF385D
cg18503679	-0.608825	0.180058	0.000744001	0.0106547	0.0148754	0.473958	-0.0692101	0.0228304	0.00251528	1576	3	ZNF385D
cg26077378	-0.286677	0.0446052	1.92856e-10	0.00283922	0.00319505	0.374368	0.0151401	0.00452771	0.000865626	1588	3	ZNF385D
cg00687135	-0.19599	0.0349319	2.47696e-08	0.00350488	0.00289359	0.226013	0.00745299	0.00445834	0.0949861	1578	3	ZNF385D
cg05529343	0.297432	0.0594499	6.58351e-07	-0.0150559	0.00413738	0.000284953	-0.00290375	0.00578706	0.615977	1555	3	3p24.3
cg15693572	0.387164	0.0568412	1.71636e-11	-0.00783525	0.0029557	0.00814279	0.0091538	0.00375147	0.0149055	1589	3	3p24.3
cg23480021	0.761425	0.0792252	5.19497e-21	-0.0112101	0.00517908	0.0306186	0.0121177	0.00704371	0.0857693	1574	3	3p24.3
cg03274391	0.614385	0.0685277	1.61694e-18	-0.00675148	0.00357111	0.0589413	0.0149605	0.00452246	0.000982529	1586	3	3p24.3
cg04044720	0.142512	0.0223866	2.64202e-10	0.00659115	0.00203845	0.00125371	-0.00715242	0.00333252	0.0321659	1584	3	3p24.3
cg24719910	-0.118137	0.0333762	0.000412745	6.75609e-05	0.00338725	0.98409	-0.000880827	0.00599809	0.883286	1589	3	TGFBR2
cg00501876	-0.169534	0.0155275	1.14484e-26	0.00908494	0.0013988	1.17506e-10	-0.00101047	0.00228218	0.658059	1585	3	CSRNP1
cg03194226	-0.0953353	0.0228738	3.26622e-05	0.00365644	0.00207235	0.0778955	-0.00526561	0.00338345	0.12004	1590	3	CLEC3B
cg10255761	-0.0965095	0.0200734	1.73269e-06	-0.00189142	0.00147131	0.198837	-0.00153643	0.00211581	0.467956	1586	3	KLHDC8B
cg18642234	-0.124714	0.0147595	8.15887e-17	-0.00685145	0.00119613	1.25425e-08	-0.00383026	0.00181578	0.035224	1585	3	GPX1
cg22117188	-0.0693921	0.0118356	5.6251e-09	-0.000289898	0.00112564	0.796803	0.00590559	0.00190065	0.0019572	1589	3	3p21.1
cg15417641	0.369947	0.0492943	1.32035e-13	0.00136499	0.00316861	0.666699	0.00672141	0.00430477	0.118839	1587	3	CACNA1D
cg00336149	0.250907	0.0342584	5.20848e-13	-0.00117074	0.00173379	0.499662	0.00190087	0.00218333	0.384225	1583	3	CACNA1D
cg21188533	0.377318	0.0597898	4.21016e-10	0.00180735	0.00338213	0.593181	0.00363382	0.00438135	0.407142	1587	3	CACNA1D
cg02336104	-0.147378	0.0244744	2.38684e-09	0.00489541	0.00158558	0.00206381	0.000562323	0.00215134	0.793867	1577	3	FOXP1
cg18754985	-0.166966	0.0342635	1.21196e-06	0.0061241	0.00352428	0.0825164	0.00177087	0.00630637	0.778931	1585	3	CLDND1
cg08375941	-0.219038	0.0391271	2.56119e-08	0.00119969	0.0040324	0.766126	0.0197665	0.00721417	0.00628311	1577	3	GPR15
cg19859270	-0.325144	0.0292588	1.21985e-27	0.00485306	0.00292871	0.0977551	-0.00464025	0.00513015	0.366001	1590	3	GPR15
cg02657160	-0.202546	0.0254106	3.15515e-15	-0.000190954	0.00243885	0.937604	0.00676962	0.00414687	0.102985	1585	3	CPOX
cg04039397	-0.165058	0.0423977	0.00010422	0.0169597	0.0035181	1.5972e-06	-0.0100458	0.00542015	0.0642019	1553	3	CD96
cg22870429	-0.0845309	0.0194621	1.51404e-05	0.00216383	0.00165398	0.191012	0.00010197	0.00258492	0.968543	1589	3	TIGIT
cg01756424	0.0649406	0.0110357	5.06191e-09	-0.00477001	0.000954998	6.66768e-07	-0.00344572	0.00151339	0.0230646	1588	3	3q21.3
cg25197194	0.167152	0.0271107	9.70873e-10	-0.00053761	0.00202726	0.790904	-0.00346474	0.00294956	0.240486	1589	3	CCDC48
cg02782510	0.0966323	0.0231037	3.06403e-05	-0.00134482	0.0021044	0.522899	-0.00180543	0.00345276	0.601193	1589	3	B3GALNT1
cg02556393	-0.138228	0.0284902	1.38515e-06	0.000644982	0.00223598	0.773042	-0.00177886	0.00333132	0.593507	1584	3	MECOM
cg19825437	-0.13157	0.0221822	3.96375e-09	-0.00039875	0.00167093	0.811423	-0.000355062	0.00244626	0.884634	1586	3	3q26.2
cg06294803	-0.159478	0.0347414	4.87722e-06	-0.0098652	0.00283933	0.000528273	0.00236811	0.00432503	0.584168	1586	3	EIF4G1
cg22891595	0.134121	0.0178469	1.10755e-13	-0.003333	0.00141851	0.018937	6.39555e-05	0.00212645	0.976014	1589	3	3q29
cg13185177	0.153272	0.0279896	5.29353e-08	-0.00598506	0.0022288	0.00733617	0.00896878	0.00334197	0.00743657	1587	3	GP5
cg25469474	-0.326622	0.0522918	5.58449e-10	-0.0149507	0.00480325	0.00189446	0.0295825	0.0079263	0.000203585	1584	4	TNIP2
cg08763102	-0.0823812	0.0158318	2.25011e-07	0.00472864	0.00144653	0.00110733	0.000674783	0.00237394	0.776297	1587	4	HTT
cg21121843	-0.177372	0.0319577	3.52953e-08	0.00288045	0.00244892	0.239723	-0.0112751	0.00360532	0.00182949	1588	4	HTT
cg26540191	-0.23062	0.0492076	3.08442e-06	-0.00399106	0.00429274	0.3527	0.00971551	0.00689441	0.159296	1571	4	DOK7
cg01442064	-0.0918663	0.017489	1.74244e-07	0.00367112	0.00154356	0.0175308	-0.00041225	0.00246085	0.867001	1587	4	EVC
cg03254067	0.120585	0.0225227	1.00348e-07	-0.00414313	0.00210106	0.0488284	-0.0040249	0.00348762	0.248828	1583	4	CLNK
cg19719391	0.110373	0.020274	6.30261e-08	0.00412997	0.00163296	0.01155	0.00349983	0.00247412	0.157595	1577	4	4p15.2
cg03109660	-0.0989604	0.0186898	1.38393e-07	0.00687905	0.00169288	5.1177e-05	9.77583e-05	0.00277317	0.971888	1586	4	RELL1
cg14906103	0.10873	0.0193171	2.19707e-08	-0.0157105	0.00176006	1.43966e-18	-0.00571851	0.00288126	0.0475219	1587	4	TMEM33
cg16936060	0.110878	0.0206119	8.97704e-08	-0.00162668	0.00163752	0.320706	0.00100971	0.00245181	0.680583	1588	4	HOPX
cg20357806	0.110625	0.0235757	2.97712e-06	0.00610029	0.00211122	0.00392232	0.00294455	0.0034105	0.388194	1572	4	PPBP
cg00689360	-0.160422	0.035724	7.77347e-06	0.0007924	0.00287342	0.782768	-0.00973984	0.00434473	0.0252549	1587	4	ADH1C
cg03415545	-0.204236	0.040253	4.43792e-07	0.000239044	0.0036432	0.947695	0.00318122	0.00592857	0.591701	1579	4	ADH1C
cg08947774	0.1062	0.0205704	2.80291e-07	-0.0116717	0.00181217	1.65552e-10	-0.00174034	0.00290597	0.549424	1586	4	PALLD
cg24693803	0.124636	0.0213297	6.77943e-09	0.00513721	0.00143104	0.000343606	-0.000796637	0.00197757	0.687178	1588	4	4q34.1
cg24556382	-0.239411	0.0325432	3.60807e-13	0.0123672	0.00244961	5.08849e-07	-0.00324696	0.0035155	0.355979	1559	4	GALNT7
cg11554391	-0.220261	0.0279493	7.07873e-15	-0.000211887	0.0022962	0.926492	-7.82795e-05	0.0035197	0.982262	1586	5	AHRR
cg17924476	0.290997	0.0323225	1.05759e-18	0.000770015	0.00199877	0.700125	9.11246e-05	0.0026646	0.972728	1587	5	AHRR
cg23067299	0.319558	0.0484106	5.92426e-11	0.00452479	0.00415921	0.276839	-0.015209	0.00659076	0.0212807	1584	5	AHRR
cg08606254	0.191923	0.0376777	4.026e-07	0.0049431	0.00323833	0.127139	0.00446145	0.00510943	0.382832	1586	5	AHRR
cg09338136	-0.156231	0.0238156	8.09579e-11	-0.000416593	0.00181417	0.818413	0.0105556	0.00265817	7.82839e-05	1582	5	AHRR
cg24688690	-0.090581	0.0115066	7.03266e-15	-0.000133591	0.00104091	0.897898	0.00189361	0.00169866	0.265291	1587	5	AHRR
cg09084391	-0.256251	0.050906	5.55829e-07	0.00195549	0.00391203	0.617252	0.00669424	0.00575861	0.245394	1590	5	AHRR
cg12806681	-0.400876	0.0341905	3.37e-30	0.00100815	0.00283596	0.722279	0.0024637	0.00437528	0.573533	1574	5	AHRR
cg03991871	-0.532628	0.0405383	1.36024e-36	0.00510107	0.00262207	0.0519493	-0.00752768	0.00356037	0.0348072	1590	5	AHRR
cg23916896	-0.561669	0.0462561	4.20475e-32	0.00779409	0.00369103	0.0349053	-0.0205346	0.00554069	0.000225217	1580	5	AHRR
cg11902777	-0.573039	0.0445844	2.67508e-35	0.00213184	0.003086	0.489812	-0.00124717	0.00429198	0.771448	1584	5	AHRR
cg01899089	-0.189619	0.0191764	3.10793e-22	-0.0020569	0.00154786	0.184118	-0.00649538	0.00233523	0.00554042	1585	5	AHRR
cg23576855	-0.985478	0.104472	3.81406e-20	-0.00941129	0.00312336	0.0026583	-0.00350103	0.00366034	0.339128	1588	5	AHRR
cg05575921	-2.57541	0.0615945	2.18155e-233	-0.0310579	0.0046967	5.47641e-11	0.0609505	0.00687611	5.28615e-18	1589	5	AHRR
cg22356527	0.137706	0.0226952	1.65276e-09	0.00019306	0.00217705	0.929351	-0.00372984	0.00371286	0.315413	1579	5	AHRR
cg26703534	-0.366862	0.0156587	4.02378e-100	-0.00636056	0.0012344	2.95631e-07	0.00267306	0.00184654	0.148132	1589	5	AHRR
cg01097768	-0.118249	0.018366	1.61494e-10	0.00392994	0.00185001	0.0338429	0.00236913	0.00326417	0.468176	1579	5	AHRR
cg14817490	-0.52603	0.0307563	4.01527e-58	-0.0222914	0.00207316	7.47812e-26	-0.00212595	0.00286565	0.45839	1586	5	AHRR
cg17287155	-0.354396	0.0332111	1.4684e-25	0.0167645	0.00291652	1.11676e-08	-0.0111165	0.00464541	0.0169442	1586	5	AHRR
cg04551776	-0.218563	0.0211318	3.77395e-24	0.00652848	0.00181722	0.00033938	-0.00748439	0.00287298	0.00935914	1585	5	AHRR
cg25648203	-0.451161	0.0246627	3.30986e-66	-0.0103195	0.00198066	2.18685e-07	-4.25298e-05	0.00299334	0.988668	1582	5	AHRR
cg16219322	-0.115779	0.019216	2.12488e-09	0.00208796	0.00188333	0.26779	-0.00425133	0.00325201	0.191493	1588	5	AHRR
cg21161138	-0.527891	0.0221108	1.17873e-103	-0.00177585	0.00178488	0.319945	0.00115214	0.00268868	0.668395	1584	5	AHRR
cg03604011	0.549583	0.0654372	1.18359e-16	-0.00242552	0.00555351	0.66236	0.0176588	0.0086798	0.0422397	1586	5	AHRR
cg24090911	-0.257134	0.0296469	1.09977e-17	-0.00120833	0.00285139	0.671804	-0.00718399	0.00483132	0.137424	1588	5	AHRR
cg02385153	0.0973842	0.0265397	0.000251891	-0.00284928	0.00256452	0.266762	0.0111366	0.00437482	0.011101	1580	5	AHRR
cg11557553	0.103437	0.0166935	7.53034e-10	0.00165282	0.0015858	0.297487	0.00222038	0.00268508	0.408528	1585	5	AHRR
cg22937882	0.0827576	0.0190904	1.55777e-05	0.00277022	0.0018393	0.132281	0.00191831	0.00313452	0.540717	1575	5	AHRR
cg00976097	0.614778	0.120635	4.20148e-07	-0.00326114	0.0058865	0.579694	0.00321583	0.00736834	0.662639	1582	5	AHRR
cg26529655	-0.127798	0.0166124	2.67629e-14	0.00783857	0.00157193	6.98362e-07	0.00095743	0.00264369	0.717333	1571	5	AHRR
cg26850624	0.288917	0.0433064	4.33816e-11	-0.00670261	0.00215922	0.00195836	-0.00294517	0.00270538	0.276655	1573	5	AHRR
cg10841124	0.134823	0.0320028	2.69573e-05	-0.00717508	0.00276012	0.00943794	0.0126029	0.00436269	0.00397478	1585	5	AHRR
cg03999941	-0.159003	0.0308322	2.90786e-07	0.0130477	0.00265554	1.00778e-06	-0.00853252	0.00416137	0.0406674	1560	5	5p15.33
cg21747070	-0.164003	0.0251976	1.18539e-10	0.00875695	0.00156739	2.85266e-08	-0.00060384	0.00209769	0.773531	1584	5	5p15.33
cg10179300	-0.19165	0.030104	2.72004e-10	0.00811246	0.00247407	0.00106856	0.00207182	0.00378186	0.583964	1586	5	TRIO
cg13039251	0.344535	0.03602	7.04833e-21	-0.00482808	0.00252955	0.0565268	0.00162548	0.00355968	0.648059	1589	5	PDZD2
cg11197630	-0.146979	0.037001	7.45668e-05	0.00817104	0.00365972	0.0257428	0.0040375	0.00632639	0.523528	1584	5	5q11.2
cg06433467	-0.213833	0.0478304	8.56257e-06	0.00312229	0.00361394	0.387769	0.00106605	0.00527095	0.839773	1590	5	5q13.1
cg05673882	-0.22263	0.0303508	4.30028e-13	0.000235148	0.00211907	0.91166	-0.00572066	0.00297178	0.0545911	1590	5	POLK
cg08595501	-0.154241	0.0367832	2.9146e-05	-0.00147929	0.00356554	0.678296	-0.00897652	0.00611091	0.142249	1578	5	IQGAP2
cg10874644	0.203218	0.0424688	1.91847e-06	0.00480372	0.00340308	0.158307	0.00457909	0.00513374	0.372687	1580	5	5q14.3
cg01272202	-0.13634	0.021732	4.83928e-10	0.00606799	0.00181937	0.000875789	0.00343298	0.00281218	0.222548	1586	5	MCC
cg08266095	-0.164191	0.0327107	6.06427e-07	-0.00180136	0.00220651	0.414436	-0.00477377	0.00305497	0.118545	1589	5	5q23.2
cg04704634	0.108329	0.019812	5.45324e-08	0.00041585	0.00171307	0.808236	-0.00425548	0.00271354	0.11723	1589	5	IL3
cg11225089	0.0981005	0.0183027	9.74045e-08	-0.00211986	0.00167535	0.205981	-0.00203558	0.00277157	0.462893	1576	5	5q31.1
cg23233742	-0.132531	0.0222404	3.40684e-09	-0.00129027	0.00158255	0.415043	4.67978e-05	0.00222859	0.983252	1586	5	5q31.2
cg10678215	0.137665	0.0291822	2.64107e-06	0.0118165	0.00256145	4.34666e-06	-0.00326472	0.00409044	0.425033	1586	5	HMHB1
cg09560590	0.162121	0.0247881	9.47757e-11	0.00664445	0.00168442	8.43124e-05	-0.0022335	0.00233431	0.338957	1589	5	HMHB1
cg04225775	0.156875	0.0245752	2.53249e-10	0.00947109	0.00177272	1.08109e-07	-0.0092726	0.00252561	0.000257597	1588	5	HMHB1
cg02228160	0.160566	0.023778	2.35717e-11	0.00816404	0.00166986	1.14709e-06	-0.00166113	0.00233317	0.476706	1549	5	HMHB1
cg14580211	-0.244526	0.0230386	3.32786e-25	-0.0113384	0.00179263	3.45853e-10	-0.00209208	0.00266281	0.4323	1584	5	C5orf62
cg17668731	0.0746087	0.0139404	1.00887e-07	-0.0100525	0.00134299	1.3203e-13	-0.00204017	0.00228736	0.372704	1586	5	CCNJL
cg27310319	0.145337	0.024933	6.8751e-09	0.00807457	0.00236098	0.000645732	-0.010618	0.00398097	0.00780629	1579	5	GABRB2
cg24698211	-0.133189	0.0233949	1.58507e-08	-0.00113824	0.00175191	0.515992	0.00199337	0.00254304	0.433367	1590	5	FGF18
cg17038235	0.109411	0.0194621	2.37202e-08	-0.0116187	0.00146997	5.70866e-15	-0.000847793	0.00214012	0.692109	1582	5	ERGIC1
cg12513616	-0.156219	0.0191511	8.98591e-16	0.00660349	0.0014258	3.99773e-06	-0.00237927	0.00207199	0.2512	1578	5	5q35.3
cg12619504	-0.116878	0.0230495	4.70321e-07	-0.00334429	0.00142984	0.019501	0.00179849	0.00191057	0.346824	1589	5	SQSTM1
cg26060489	0.0625534	0.0152666	4.40468e-05	0.00393285	0.00148642	0.00824883	-0.000998991	0.00255303	0.695686	1590	6	6p25.3
cg01882991	-0.122933	0.0214471	1.27277e-08	-0.00102008	0.00158912	0.521044	-0.00557966	0.00228555	0.0148582	1580	6	6p25.1
cg07090714	-0.167996	0.0261038	1.84663e-10	-0.00801771	0.0018099	1.02473e-05	-0.00340588	0.00250096	0.173652	1575	6	6p25.1
cg08757670	0.0718949	0.0159881	7.44938e-06	-0.00560507	0.00152363	0.00024394	-0.00310701	0.00257768	0.228428	1588	6	JARID2
cg12423733	0.267456	0.0460932	8.28251e-09	-0.00719892	0.00381417	0.0593235	0.0105532	0.00585625	0.0719277	1575	6	MAS1L
cg20103692	0.128783	0.0270418	2.10733e-06	-0.0161958	0.00261187	7.56715e-10	-0.000976723	0.00440623	0.82463	1565	6	MAS1L
cg25730428	0.149614	0.0210933	2.28953e-12	-0.00610822	0.00157838	0.000114213	-0.00515533	0.0022901	0.0246537	1586	6	MAS1L
cg06126421	-0.696886	0.0348274	1.43535e-75	-0.00832468	0.00223694	0.000207041	-0.0174419	0.00302949	1.22885e-08	1589	6	6p21.33
cg14753356	-0.236729	0.0192281	5.98617e-33	-0.0150794	0.00158065	6.49073e-21	-0.0120542	0.00242191	7.94209e-07	1588	6	6p21.33
cg24859433	-0.340784	0.0251072	2.52366e-39	-0.00065975	0.00214317	0.758253	-0.0109407	0.00335954	0.00117603	1585	6	6p21.33
cg15342087	-0.378285	0.0250637	1.76996e-47	-0.000871309	0.00211509	0.680443	-0.00696914	0.00328409	0.0341426	1586	6	6p21.33
cg23781467	0.111823	0.01848	1.95495e-09	0.00267092	0.0013547	0.0488705	-0.00327115	0.00194971	0.0938019	1575	6	VARS
cg05302489	0.176032	0.0337743	2.21755e-07	0.00449974	0.00253516	0.0761465	-0.000240114	0.00368518	0.948066	1559	6	VARS
cg04368724	0.174728	0.0317396	4.57213e-08	0.00411775	0.00233233	0.077714	0.00358829	0.003357	0.28545	1583	6	VARS
cg04018738	0.334255	0.0527447	3.51141e-10	-0.00266586	0.00329463	0.418588	0.000639928	0.00439497	0.884271	1582	6	VARS
cg17619755	0.223675	0.0328481	1.66433e-11	-0.00228676	0.00208118	0.272082	0.00117144	0.0028137	0.67728	1583	6	VARS
cg02980249	0.100002	0.0184509	7.35128e-08	-0.00265757	0.00130894	0.0425378	-0.0039368	0.00185715	0.0343515	1556	6	VARS
cg08899667	0.127	0.0193113	7.4245e-11	-0.00510805	0.00140295	0.000282673	-0.00129657	0.0019963	0.516223	1565	6	VARS
cg10807309	0.15524	0.0254245	1.43997e-09	-0.00216999	0.00164858	0.188325	-0.00404759	0.00223994	0.0711464	1586	6	VARS
cg08386009	-0.0586068	0.0128188	5.26223e-06	0.000901987	0.00117941	0.444545	0.00124462	0.00196583	0.526838	1573	6	ATF6B
cg23565821	-0.0995379	0.0202949	1.05765e-06	0.00169813	0.00169543	0.316723	0.00112852	0.00262941	0.667903	1585	6	CUTA
cg15474579	-0.103843	0.0200141	2.48957e-07	-0.00191278	0.00156537	0.22195	-0.00902054	0.00233178	0.000118611	1588	6	CDKN1A
cg18900812	-0.175886	0.0345615	4.0803e-07	0.000531521	0.00333291	0.873319	-0.00405956	0.00567371	0.474513	1550	6	CDKN1A
cg03957124	-0.0717729	0.0159064	6.95089e-06	0.0148837	0.00147885	5.3506e-23	0.000146661	0.00246215	0.952516	1585	6	6p21.2
cg08666707	-0.0926667	0.0152017	1.42198e-09	-0.00101207	0.00135785	0.456198	0.00165116	0.00219348	0.451824	1574	6	6p21.1
cg04517079	-0.123298	0.0178633	8.72485e-12	-0.000240504	0.00122209	0.844018	-0.00389137	0.00170253	0.0225453	1583	6	FOXP4
cg26701785	0.488229	0.0618417	7.69609e-15	-0.000386935	0.00362831	0.91509	-0.013809	0.00477968	0.00397185	1573	6	SYNJ2
cg10251229	0.100269	0.0176549	1.6725e-08	-0.00865967	0.00150458	1.07095e-08	-0.00605586	0.00234981	0.0101457	1586	7	PRKAR1B
cg26669717	-0.0716253	0.0150363	2.11513e-06	0.000237957	0.00130819	0.855691	-0.00249982	0.00207667	0.229048	1579	7	PRKAR1B
cg17551891	-0.239401	0.0400903	3.19998e-09	0.000656583	0.00271674	0.809068	-0.00605469	0.00376492	0.108208	1559	7	MAD1L1
cg09658497	-0.35875	0.0693971	2.83764e-07	-0.0115697	0.00408246	0.00467605	-0.00472729	0.00536566	0.378577	1583	7	GNA12
cg19717773	-0.304553	0.0557184	5.89673e-08	-0.00824735	0.00285779	0.00398194	-0.0121363	0.00362584	0.000856626	1563	7	GNA12
cg18446336	-0.203089	0.0373044	6.59544e-08	0.00284977	0.00209895	0.174824	-0.00984946	0.00272977	0.000328106	1588	7	GNA12
cg18961281	0.0891042	0.0162094	4.57167e-08	0.00969909	0.00151672	2.23303e-10	-0.00374752	0.00253092	0.139088	1589	7	CARD11
cg09022230	-0.205558	0.0242098	6.54139e-17	-0.00670781	0.00173475	0.000115822	-0.00154969	0.00245817	0.528603	1586	7	TNRC18
cg04907244	-0.185223	0.0392281	2.65688e-06	-0.00281366	0.00257231	0.274244	-0.00335733	0.0035091	0.33899	1587	7	SNORD93
cg22407942	-0.178986	0.0337995	1.45857e-07	-0.00483934	0.00202913	0.0172386	-0.0022078	0.00268101	0.410478	1589	7	SNORD93
cg02451831	-0.21074	0.0211977	1.7077e-22	-0.000836985	0.00184118	0.649478	0.00104328	0.00293017	0.721903	1559	7	KIAA0087
cg19816811	-0.136498	0.0320926	2.31304e-05	-0.00574408	0.00174148	0.00100314	-0.00174946	0.00222979	0.432936	1579	7	HOXA6
cg16880946	-0.136698	0.0272855	6.49249e-07	-0.00449468	0.00142075	0.00160123	0.00118173	0.00180537	0.512943	1581	7	HOXA6
cg25727671	-0.176056	0.0397202	1.00598e-05	-0.00901949	0.00358985	0.0121057	0.00640408	0.00586167	0.274929	1588	7	HOXA7
cg08396193	-0.173203	0.0294567	5.19562e-09	-0.00543742	0.00256974	0.0345342	0.00673752	0.00408579	0.0995446	1589	7	HOXA7
cg24389054	-0.208712	0.0310894	2.95123e-11	-0.00665498	0.00240281	0.00569008	0.00821163	0.0035325	0.0203474	1587	7	HOXA7
cg08972170	0.184967	0.0279509	5.41435e-11	0.000304021	0.00230865	0.895251	0.00282313	0.00354186	0.42565	1589	7	C7orf41
cg19089201	0.639091	0.0778338	6.63423e-16	-0.00439014	0.00474228	0.354765	-0.00466377	0.0063008	0.459408	1589	7	MYO1G
cg22132788	1.10223	0.0918765	5.12589e-31	-0.00292754	0.00509154	0.565425	0.00183502	0.00656982	0.780084	1533	7	MYO1G
cg04180046	0.262495	0.029867	6.7977e-18	-0.00156162	0.00168615	0.354565	-0.00802262	0.00218644	0.000259989	1588	7	MYO1G
cg12803068	0.711483	0.0637157	3.0434e-27	-0.00721432	0.00307831	0.0192823	0.00694094	0.00384433	0.0713812	1589	7	MYO1G
cg07826859	-0.145285	0.0148488	6.60428e-22	-0.00184733	0.00136225	0.175305	-0.00504779	0.00224354	0.0247346	1590	7	MYO1G
cg03440944	-0.163292	0.0225436	7.08608e-13	-0.00304718	0.00214666	0.155994	0.0120813	0.00362846	0.000910238	1588	7	C7orf40
cg19956914	0.245565	0.0328462	1.77551e-13	-0.0038141	0.00159736	0.0171254	0.0049577	0.0019983	0.0133124	1589	7	SUMF2
cg26790897	0.153191	0.0217696	3.15164e-12	-0.00338176	0.0018988	0.0751404	-0.00153246	0.00302421	0.612486	1586	7	SUMF2
cg10691866	-0.131224	0.0320127	4.48936e-05	-0.00434732	0.00184075	0.0183551	-0.00298083	0.00240091	0.214776	1590	7	TPST1
cg07413467	0.173331	0.0297949	7.91531e-09	-0.000515478	0.00195219	0.791784	-0.00273363	0.00266948	0.306138	1584	7	CDK6
cg06688763	0.349547	0.0537703	1.27815e-10	-0.00543934	0.00295004	0.065471	-0.00397806	0.0037976	0.295184	1585	7	CDK6
cg08038054	0.138222	0.0284458	1.32518e-06	0.0019261	0.0023991	0.422206	0.0051442	0.0037261	0.167797	1588	7	GNG11
cg09762515	0.10642	0.0219236	1.3472e-06	0.00249499	0.00200337	0.213209	0.00492748	0.00328382	0.133878	1577	7	CUX1
cg15600935	0.104733	0.0302527	0.000551356	0.00950093	0.00300538	0.00160799	0.00894274	0.00522539	0.0874004	1584	7	CUX1
cg14012925	0.164501	0.0233567	3.1959e-12	-0.00593282	0.0017974	0.000989912	-0.00517801	0.00264546	0.0506646	1586	7	CUX1
cg27405731	0.139298	0.0245208	1.68154e-08	-0.0192579	0.00194947	2.98157e-22	1.38199e-05	0.00293104	0.996239	1581	7	CUX1
cg19798735	-0.228083	0.03377	2.04317e-11	0.00447299	0.0033843	0.186512	0.0166455	0.0059142	0.00500716	1585	7	IMMP2L
cg25748521	-0.09548	0.0170102	2.38631e-08	0.00788815	0.00159317	8.33642e-07	-0.00226435	0.00265951	0.394797	1588	7	HIPK2
cg21322436	-0.326789	0.0254811	1.30042e-35	-0.00101487	0.00227392	0.655446	-0.00888766	0.00366872	0.0156362	1587	7	CNTNAP2
cg25949550	-0.292841	0.0252853	2.09427e-29	-0.00113493	0.00190604	0.551653	-0.00218903	0.0027721	0.429969	1586	7	CNTNAP2
cg11207515	0.266827	0.0368747	8.41906e-13	0.00517896	0.00278405	0.063079	0.00285655	0.00405797	0.481683	1579	7	CNTNAP2
cg15700587	0.0885599	0.0214275	3.78172e-05	-0.000489232	0.00209797	0.815649	0.00376543	0.00360214	0.296194	1576	7	MIR548I4
cg17372101	0.17157	0.0248264	8.02751e-12	-0.0035555	0.0018297	0.052206	0.0065844	0.00263419	0.0126385	1586	7	CNTNAP2
cg24931658	-0.140493	0.0187257	1.23446e-13	-0.000374094	0.00144328	0.795524	0.00209446	0.00212628	0.324915	1588	8	EPB49
cg08149865	-0.152763	0.0192964	5.91663e-15	-0.00484452	0.00137159	0.000426973	-0.000865465	0.00193791	0.655291	1588	8	EPB49
cg24540678	-0.142684	0.0207679	1.01683e-11	0.00567419	0.00168239	0.000765783	-0.0100636	0.00255031	8.66232e-05	1587	8	8p21.1
cg13518625	-0.310973	0.0600984	2.64126e-07	-0.00186169	0.00526472	0.723682	-0.00914713	0.00840253	0.276656	1578	8	8p12
cg14089503	-0.0995135	0.0276625	0.000334902	0.0148232	0.00214229	7.09488e-12	0.000178066	0.00316893	0.955204	1569	8	RAB11FIP1
cg19589396	-0.149564	0.0256624	7.25905e-09	0.00527824	0.00195935	0.00715454	-0.00142932	0.00291801	0.624399	1564	8	8q22.3
cg01873977	-0.150702	0.0320729	2.91539e-06	0.011767	0.00257471	5.32234e-06	-0.00886188	0.00387338	0.0224071	1585	8	MTSS1
cg24838345	-0.25307	0.0399066	3.07729e-10	0.00247724	0.00363142	0.495252	-0.00781356	0.00592595	0.187708	1587	8	MTSS1
cg25305703	-0.269689	0.034666	1.5697e-14	0.00100338	0.00271041	0.711297	-0.00595864	0.00403792	0.140436	1588	8	8q24.21
cg12075928	-0.240862	0.0288607	1.67351e-16	0.0149209	0.00271308	4.58179e-08	-0.00912404	0.0045285	0.0442672	1569	8	PTK2
cg12873476	-0.145796	0.0283252	3.19056e-07	-0.000691769	0.00164679	0.674512	0.000816474	0.00216508	0.706195	1581	8	8q24.3
cg26361535	-0.285151	0.0316657	1.03588e-18	-0.00240248	0.00198745	0.226967	-0.00414351	0.00266444	0.120328	1585	8	ZC3H3
cg03345925	0.108637	0.0201717	8.66565e-08	0.0113429	0.00161493	3.44182e-12	-0.000730888	0.00242771	0.763448	1586	8	ZC3H3
cg13787850	-0.161583	0.0270883	3.27904e-09	0.0033448	0.00194601	0.0858896	-0.00377041	0.00276468	0.17303	1588	9	9q31.1
cg01692968	-0.241411	0.0281108	2.45399e-17	0.00436847	0.00246705	0.0768348	-0.00597226	0.00392743	0.12875	1587	9	9q31.2
cg14142087	0.0897771	0.0166347	8.19149e-08	0.00930908	0.00127826	5.61623e-13	0.00092551	0.001881	0.622836	1585	9	9q31.3
cg13418576	-0.138978	0.0246143	1.99861e-08	-0.0014613	0.00218882	0.504491	-0.00966593	0.00353541	0.0063958	1584	9	9q33.3
cg13582060	-0.199323	0.0452785	1.16685e-05	-0.0176377	0.0036269	1.29752e-06	0.00327076	0.00544263	0.548049	1567	9	NEK6
cg05517711	-0.0418977	0.0128344	0.00112519	-0.00263907	0.00110453	0.0170174	-0.000954927	0.00174258	0.58385	1584	9	ST6GALNAC6
cg07954423	-0.142457	0.0289034	9.39343e-07	0.00347393	0.00236825	0.142645	-0.00471195	0.00362272	0.193752	1587	9	FAM102A
cg14264316	-0.0785674	0.0205025	0.000132273	0.0136003	0.00204554	4.39607e-11	-0.00377841	0.00357537	0.29093	1583	9	9q34.2
cg13543915	-0.06673	0.0152764	1.35515e-05	0.00604205	0.0012794	2.57408e-06	-0.00307584	0.00197981	0.120681	1587	9	9q34.2
cg13784312	-0.395958	0.0962169	4.07888e-05	-0.0199965	0.00943188	0.0341907	0.00477119	0.0163038	0.769872	1586	9	RAPGEF1
cg02257517	0.102425	0.0158875	1.66156e-10	-0.00367644	0.00124297	0.00315397	-0.00658325	0.00184707	0.000387555	1586	9	SLC2A6
cg14120703	-0.07239	0.0120715	2.55005e-09	-0.0108652	0.00112829	2.97143e-21	0.000502311	0.00188033	0.789432	1586	9	NOTCH1
cg14435720	-0.247643	0.0589069	2.7972e-05	1.11704e-05	0.00519808	0.998286	-0.00747726	0.00838966	0.373071	1584	9	EGFL7
cg00563932	0.0857679	0.0158036	6.94601e-08	-0.00721504	0.0012465	8.89446e-09	-0.00386593	0.00186227	0.0382377	1580	9	PTGDS
cg22539182	0.121815	0.018908	1.80077e-10	-0.0013649	0.00119584	0.253939	-0.000341141	0.00160691	0.831931	1588	10	10p15.3
cg11430077	-0.194689	0.0373047	2.11944e-07	0.0123511	0.00294236	2.87498e-05	-0.0054321	0.00438618	0.215915	1589	10	GATA3
cg04813697	-0.118051	0.0283343	3.32781e-05	0.00821617	0.00211398	0.000106749	-0.000801144	0.00308063	0.794887	1585	10	PIP4K2A
cg25212025	-0.138475	0.0276461	6.43566e-07	0.00826361	0.00175572	2.80741e-06	-0.00541107	0.00236205	0.0222385	1579	10	PARD3
cg09848445	-0.226393	0.0463042	1.1234e-06	0.00268804	0.00447661	0.548304	0.00711128	0.00767609	0.354512	1582	10	RET
cg25953130	-0.183458	0.0354321	2.62773e-07	0.00972487	0.00284087	0.000637839	-0.00191831	0.0043075	0.656195	1579	10	ARID5B
cg20684110	-0.164028	0.0326961	6.19274e-07	-0.000994487	0.00208366	0.633251	0.00238902	0.0028231	0.397686	1567	10	ADO
cg01005506	-0.105577	0.0238927	1.10018e-05	0.000110086	0.0014382	0.938999	-0.000585996	0.00190224	0.758122	1588	10	ADO
cg12474798	-0.191148	0.0368109	2.51537e-07	-0.00134575	0.00215271	0.532001	0.00347307	0.00282036	0.218536	1587	10	ADO
cg00210249	0.221943	0.0309289	1.31506e-12	0.00742404	0.00221392	0.000821691	0.00368075	0.0031439	0.242057	1578	10	HK1
cg10750182	-0.134147	0.0117125	4.65731e-29	-0.00753331	0.0010547	1.5083e-12	-0.00113345	0.00171226	0.508192	1587	10	C10orf105
cg12147622	-0.124758	0.0229938	6.92447e-08	0.0140428	0.00191055	3.44758e-13	-0.0116654	0.00294292	8.05481e-05	1585	10	10q22.2
cg01839993	-0.13074	0.0218657	3.07401e-09	0.0121264	0.00140588	1.95127e-17	-0.00191014	0.00190741	0.31693	1577	10	DDIT4
cg10592592	-0.127941	0.0261011	1.09966e-06	0.00958894	0.00172802	3.50935e-08	-0.00368405	0.00237432	0.121162	1584	10	DDIT4
cg04858631	-0.128918	0.0259883	7.85153e-07	0.0207984	0.00249767	2.08755e-16	0.0047884	0.00425064	0.260289	1585	10	DDIT4
cg22998476	-0.113559	0.020567	4.1701e-08	-0.00985766	0.00154825	2.6801e-10	2.64034e-05	0.00226073	0.990685	1576	10	10q22.2
cg02743070	-0.0901078	0.0147875	1.42475e-09	0.00039003	0.00136402	0.774968	-0.00392029	0.00225498	0.0825108	1590	10	ZMIZ1
cg03450842	-0.171292	0.0169072	3.32771e-23	-0.000658827	0.0013352	0.621791	-0.00312792	0.00199685	0.117651	1589	10	ZMIZ1
cg18295744	-0.0653935	0.0156024	2.94462e-05	0.00201432	0.00146596	0.169657	-0.00175887	0.00245847	0.474552	1589	10	ZMIZ1
cg22845855	-0.143058	0.0319438	8.18208e-06	0.00431154	0.0027424	0.116146	-0.000181238	0.00431237	0.966487	1585	10	MYOF
cg27312979	0.346926	0.0416705	2.94638e-16	-0.00714648	0.00216388	0.000988898	0.00339673	0.00273828	0.215182	1585	10	SORBS1
cg25421530	0.170826	0.0314206	6.43642e-08	0.0159032	0.00280027	1.66e-08	-0.002409	0.00451702	0.593966	1586	10	SORBS1
cg17333042	-0.0969339	0.0160963	2.31493e-09	0.00316456	0.00121732	0.00943776	0.00128227	0.00177735	0.470851	1577	10	KAZALD1
cg09701700	-0.0976671	0.0232448	2.87873e-05	-0.00723105	0.00150971	1.87552e-06	0.00319117	0.00204409	0.118895	1586	10	MIR146B
cg05329352	-0.212341	0.0290981	5.86956e-13	0.00582563	0.00182303	0.0014315	-0.00316662	0.00243623	0.19405	1586	10	ADRA2A
cg14165660	0.110122	0.0211781	2.31298e-07	-0.00410408	0.00182778	0.024906	-0.00158531	0.0028854	0.58287	1589	10	10q25.2
cg15806304	0.100388	0.0188256	1.15879e-07	-0.00265887	0.00147587	0.0718445	-0.00184434	0.00219384	0.400782	1584	10	SLC18A2
cg12729894	-0.0830933	0.0179968	4.29356e-06	0.00220497	0.00150038	0.141904	0.000144348	0.0023154	0.950306	1588	11	HCCA2
cg04258133	0.220815	0.029997	3.44099e-13	-0.00231156	0.00227183	0.309108	-0.000500812	0.003325	0.880314	1588	11	TNNT3
cg13428066	0.08791	0.0176346	6.98475e-07	-0.00883985	0.00161591	5.37726e-08	-0.00218586	0.0026445	0.408739	1574	11	KCNQ1
cg01744331	-0.390428	0.0519884	1.07078e-13	-0.00429467	0.00463344	0.354155	-0.0056614	0.00751422	0.451422	1586	11	KCNQ1OT1
cg07123182	-0.350342	0.0515139	1.55253e-11	-0.00908342	0.00462183	0.0495866	-0.01261	0.00751205	0.0936195	1576	11	KCNQ1OT1
cg16556677	-0.118838	0.0211243	2.26193e-08	0.002234	0.00182043	0.219973	-0.00868349	0.00288322	0.00268201	1578	11	KCNQ1OT1
cg26963277	-0.421335	0.0421273	1.24859e-22	-0.00416661	0.00315739	0.187189	-0.00371926	0.00456842	0.415825	1583	11	KCNQ1OT1
cg24497361	-0.0903193	0.0177108	3.9706e-07	0.00129117	0.00135037	0.339167	-0.00239243	0.00198117	0.227575	1583	11	RHOG
cg03220447	-0.0667924	0.0169446	8.50317e-05	0.0068089	0.00151024	7.10533e-06	-0.00337495	0.00243346	0.165871	1587	11	NAV2
cg04039799	-0.0776095	0.0162764	2.07069e-06	0.0109453	0.00138526	5.74791e-15	-0.00370962	0.00217304	0.0882009	1584	11	NAV2
cg01481251	-0.226946	0.0402334	2.06245e-08	0.00445043	0.00356214	0.21175	0.00456214	0.00573469	0.426545	1587	11	11p13
cg09197783	-0.11882	0.0191353	7.08379e-10	0.0102315	0.00169002	1.83525e-09	-0.00730157	0.00272206	0.00746399	1586	11	SLC43A3
cg16611234	-0.227488	0.0341115	4.03371e-11	0.005861	0.00247821	0.0181758	-0.00381794	0.00353026	0.279813	1585	11	11q12.1
cg19254163	-0.122368	0.0175176	4.70422e-12	0.00201157	0.00137948	0.145018	-0.00458173	0.00206231	0.0265935	1586	11	GPR44
cg07029024	0.111921	0.0251241	9.15402e-06	-0.00487624	0.00208417	0.0194485	-0.00349296	0.00319594	0.27476	1585	11	11q13.1
cg04383058	-0.118231	0.021872	7.64188e-08	0.00649175	0.00194896	0.000889684	0.000769957	0.00314637	0.806744	1587	11	PITPNM1
cg21611682	-0.196902	0.0153338	2.2424e-35	-0.00263941	0.00115607	0.0225837	-0.00238343	0.00168022	0.156439	1585	11	LRP5
cg10420527	-0.0862035	0.0131778	9.04826e-11	-0.00448266	0.00102163	1.23607e-05	-0.0040234	0.00150964	0.0078542	1589	11	LRP5
cg09578155	-0.0803755	0.0112946	1.83751e-12	-0.00254657	0.000961194	0.00815888	0.000360896	0.00150329	0.810338	1587	11	LRP5
cg14624207	-0.134863	0.015867	5.3635e-17	-0.00489456	0.00132196	0.000222253	-0.00645681	0.00204044	0.00161549	1588	11	LRP5
cg11263997	0.187827	0.0333145	2.11854e-08	0.00691309	0.00278267	0.0131007	-0.0073371	0.00431039	0.0891121	1587	11	CTTN
cg01901332	-0.215214	0.0242937	3.11443e-18	-0.00344181	0.00178305	0.0537889	-0.00420844	0.00255991	0.10059	1587	11	ARRB1
cg10788371	-0.158286	0.0223627	2.70321e-12	0.0010972	0.00140299	0.434342	0.000440804	0.00189367	0.815995	1584	11	LRRC32
cg07202214	-0.105785	0.0222149	2.16253e-06	0.000523463	0.00167416	0.75458	-0.00926377	0.00244683	0.000164933	1563	11	LRRC32
cg19918734	-0.104284	0.0185068	2.11067e-08	-0.0126607	0.00173373	4.88858e-13	-0.00638662	0.00288605	0.0271918	1585	11	ME3
cg11660018	-0.257243	0.0205919	1.69276e-33	-0.00193091	0.00137109	0.15929	-0.00477967	0.00188168	0.0112758	1589	11	PRSS23
cg23771366	-0.261762	0.0227337	6.03486e-29	0.00396393	0.00146899	0.00706322	-0.00465223	0.00199419	0.0199139	1583	11	PRSS23
cg23351584	-0.140642	0.0225592	5.95647e-10	0.00255396	0.00212781	0.230249	-0.0064142	0.00356923	0.0727074	1589	11	PRSS23
cg01439566	0.115345	0.0163174	2.41234e-12	0.00381173	0.00157594	0.0157152	-0.00899735	0.00268822	0.000855874	1573	11	ZBTB16
cg10827488	0.120641	0.0190466	3.29887e-10	0.00457253	0.00162998	0.00510081	0.00186702	0.0025609	0.466195	1590	11	ZBTB16
cg01218206	-0.11878	0.0240361	8.67156e-07	0.0163664	0.00223813	4.5527e-13	0.00443955	0.00372216	0.233335	1584	11	SIK3
cg03234777	-0.152584	0.0309785	9.58727e-07	-0.0158293	0.00246116	1.75639e-10	-0.0123263	0.00369676	0.000895188	1587	11	AMICA1
cg20483374	0.0865547	0.0146035	3.90159e-09	0.000134677	0.00132029	0.918768	-0.00306373	0.00215682	0.155872	1588	11	C1QTNF5
cg16983588	0.197779	0.0320177	9.29952e-10	0.00295653	0.00210709	0.160825	-0.000463198	0.00288077	0.8723	1590	11	PRDM10
cg26282236	0.16031	0.0271817	5.04573e-09	-0.00120707	0.00159172	0.448396	-0.00363542	0.00208739	0.081968	1589	12	RAD52
cg10520740	-0.0839254	0.013124	2.21313e-10	-0.000229259	0.0011783	0.845761	-0.000997658	0.00189912	0.599507	1583	12	CACNA2D4
cg02375409	0.120149	0.0260785	4.56368e-06	-0.000838449	0.00181902	0.644926	-0.00396542	0.00254406	0.119477	1568	12	FGF23
cg07178945	0.166193	0.025244	7.34917e-11	0.00149878	0.00154305	0.33159	-0.00305113	0.00205242	0.137521	1590	12	FGF23
cg23219570	0.124236	0.0228828	6.88019e-08	-0.0169405	0.00173617	9.15952e-22	-2.97569e-05	0.00254403	0.990671	1588	12	FGF23
cg07986378	-0.22649	0.0315807	1.19348e-12	-0.0102004	0.00300813	0.000718224	-0.00513834	0.0051045	0.314431	1547	12	ETV6
cg27178191	0.065996	0.0128744	3.42238e-07	0.00109848	0.00106972	0.304662	-0.00254482	0.00165284	0.124046	1582	12	SLC4A8
cg03348792	0.10481	0.0213806	1.07042e-06	0.00888489	0.00179836	8.77012e-07	0.00233111	0.00278843	0.403413	1589	12	KRT1
cg13937905	-0.319523	0.0417838	4.36758e-14	0.0250761	0.00314073	3.08724e-15	0.00375971	0.00455751	0.409659	1588	12	RARG
cg10592478	-0.122817	0.0336341	0.000270052	0.0256148	0.00319997	2.66721e-15	-0.00417995	0.00537944	0.437381	1575	12	RARG
cg01856529	-0.0917523	0.0245822	0.00019716	0.00210136	0.00228677	0.358306	-0.00192359	0.00380438	0.613263	1585	12	CBX5
cg02583484	-0.167286	0.0210262	4.65378e-15	-0.00513613	0.00136635	0.000178622	-0.00160904	0.00185949	0.387138	1588	12	HNRNPA1
cg26477856	-0.0568424	0.0128011	9.68279e-06	0.0089143	0.00118537	1.0113e-13	0.00182245	0.00196754	0.3546	1589	12	DGKA
cg22876908	-0.0555062	0.0146966	0.000166084	0.00926924	0.00130523	2.03856e-12	-0.00154475	0.00205963	0.453484	1535	12	DGKA
cg16834726	0.0793801	0.0171806	4.17581e-06	-0.0111572	0.0016415	1.64965e-11	-0.00498393	0.00279172	0.0746279	1561	12	DCTN2
cg01668352	-0.115439	0.0237876	1.33992e-06	0.000941045	0.00245312	0.701333	-0.000566468	0.00436003	0.896661	1580	12	SRGAP1
cg26995224	-0.173614	0.0376461	4.56525e-06	0.000632988	0.0017576	0.718813	-0.00161865	0.00218677	0.459401	1588	12	KDM2B
cg05957567	0.104627	0.0162499	1.72844e-10	0.00829067	0.00132513	5.31138e-10	-0.000390622	0.00201758	0.846533	1584	12	BCL7A
cg05677062	-0.135074	0.0266124	4.52384e-07	-0.00840916	0.00191328	1.19786e-05	0.00317112	0.0027188	0.243823	1587	12	SETD8
cg19888787	-0.211775	0.0487294	1.48023e-05	-0.00990748	0.00481836	0.0399682	0.0257349	0.00835364	0.00213648	1580	12	UBC
cg09717146	0.122854	0.0205858	3.02675e-09	0.00182013	0.00193278	0.346513	-0.0107013	0.00323549	0.000983976	1588	12	12q24.33
cg14563949	0.0792173	0.0144697	5.20359e-08	-0.00270829	0.00131443	0.039554	-0.00209524	0.00214989	0.330072	1589	12	12q24.33
cg00893603	-0.19691	0.0395596	7.5706e-07	0.00702452	0.00241347	0.0036751	-0.00466325	0.00322336	0.148383	1586	13	ATP8A2
cg06394460	-0.17436	0.0381599	5.36193e-06	-0.0120306	0.00330741	0.000285944	-0.0028577	0.00526222	0.587244	1569	13	LNX2
cg12836863	0.0866268	0.0183065	2.43731e-06	-0.0153637	0.00176604	1.00023e-17	-0.000622131	0.00301127	0.836375	1589	13	BRCA2
cg09716613	0.122293	0.025072	1.22033e-06	0.0155238	0.00195227	3.92691e-15	-0.00800815	0.00288989	0.00572054	1586	13	N4BP2L1
cg02101876	0.119118	0.0360428	0.000972771	0.0184376	0.00351804	1.86724e-07	-0.00323948	0.00604651	0.592275	1586	13	13q14.11
cg06648759	0.107385	0.0197763	6.8059e-08	0.00438226	0.00157984	0.00561711	-0.00385929	0.00237943	0.105218	1586	13	13q14.11
cg02985540	-0.0976056	0.0201956	1.53093e-06	-0.00203165	0.00146504	0.165754	-0.00354801	0.00209236	0.0903394	1590	13	13q14.2
cg03646329	-0.276915	0.0441247	4.72859e-10	0.0141036	0.00384094	0.000250369	0.00167211	0.00612106	0.784791	1568	13	LPAR6
cg02013841	-0.169369	0.0385881	1.2178e-05	0.0105785	0.00382873	0.00581231	0.00353238	0.00666625	0.596336	1577	13	13q14.2
cg27467282	0.172678	0.0264204	9.08683e-11	-0.00442374	0.00224376	0.0488639	-0.00411506	0.00351548	0.242132	1589	13	13q14.3
cg23126342	0.21655	0.0397562	6.29975e-08	-0.00488453	0.002853	0.0871241	0.00586995	0.00406442	0.149075	1586	13	PCDH9
cg14675361	0.17584	0.0340284	2.75645e-07	0.00173646	0.00285614	0.543307	-6.13918e-05	0.00443453	0.988958	1578	13	LMO7
cg19211853	-0.320333	0.0814094	8.78473e-05	0.010026	0.00681856	0.141693	-0.00373458	0.0103899	0.719361	1564	13	RBM26
cg16969872	-0.149126	0.0267772	3.17189e-08	0.00951715	0.00205706	4.08298e-06	0.000991688	0.00302994	0.743531	1588	13	RBM26
cg02547394	0.190329	0.0311208	1.24185e-09	0.0106499	0.00291269	0.000266074	-0.00777543	0.00485909	0.109972	1579	13	SOX1
cg12758082	0.0639582	0.013185	1.3759e-06	0.00854858	0.00115062	1.93664e-13	-0.00346591	0.00183237	0.0589261	1585	13	ATP11A
cg06885459	0.139731	0.0252194	3.81667e-08	-0.00478811	0.00161865	0.00315447	0.00192394	0.00219317	0.380622	1589	13	MCF2L
cg01435643	0.221056	0.041261	1.04017e-07	-0.0129212	0.00261584	8.91222e-07	0.00187066	0.00352274	0.595553	1589	13	MCF2L
cg24681208	0.0746039	0.0151063	8.85229e-07	-0.00407152	0.00134616	0.00253771	-0.00458734	0.00216913	0.0347571	1587	14	REM2
cg04573702	-0.0612873	0.0163597	0.000187407	0.00453619	0.00140034	0.00122743	-0.000550114	0.00219867	0.802496	1588	14	MYH6
cg26196424	-0.128128	0.0264593	1.43406e-06	0.00371413	0.00231779	0.109296	0.00361487	0.00369818	0.328638	1581	14	C14orf37
cg01731783	-0.095797	0.0114222	1.18444e-16	0.00714452	0.00107069	3.69725e-11	0.00183101	0.00178947	0.306521	1587	14	C14orf43
cg22851561	-0.146433	0.0181077	1.30139e-15	0.0120888	0.00169841	1.81475e-12	-0.00393832	0.0028393	0.165818	1579	14	C14orf43
cg16398761	-0.280975	0.043906	2.10478e-10	-0.0177716	0.00417285	2.20273e-05	-0.00691277	0.00703263	0.32593	1584	14	C14orf43
cg24996979	-0.150081	0.0182184	4.20235e-16	-0.00410008	0.00157849	0.00949411	-0.00294112	0.00249241	0.238343	1589	14	C14orf43
cg10919522	-0.179909	0.0251542	1.40884e-12	-0.000706885	0.00220458	0.74853	-0.00513805	0.0035218	0.144982	1583	14	C14orf43
cg03519879	-0.0832666	0.0135829	1.16561e-09	-0.00135737	0.00116247	0.243157	0.000470657	0.00183067	0.797174	1585	14	C14orf43
cg13976502	-0.103555	0.0151819	1.37875e-11	-0.00310586	0.00131755	0.0185525	0.000967971	0.00208908	0.643245	1585	14	C14orf43
cg16702313	-0.0628339	0.0137628	5.39222e-06	0.00600801	0.001351	9.46772e-06	0.000568347	0.00234572	0.808617	1582	14	C14orf43
cg13038618	-0.159928	0.0253311	3.7013e-10	-0.00029497	0.00224315	0.895401	-0.00264639	0.00360086	0.462599	1578	14	14q24.3
cg10825315	0.126191	0.0233182	7.35064e-08	0.0203614	0.00213574	7.09072e-21	0.00172492	0.00351722	0.623974	1579	14	TSHR
cg13525276	0.198031	0.030039	6.40995e-11	0.0242961	0.00243419	1.12383e-22	0.00168372	0.00368563	0.647917	1587	14	TSHR
cg18625627	0.205924	0.0308212	3.55802e-11	0.0212877	0.00256471	2.52167e-16	-0.000423801	0.00395258	0.914641	1580	14	TSHR
cg05875421	-0.21122	0.0247416	3.50898e-17	-0.0113944	0.00229428	7.71385e-07	0.016748	0.00380694	1.23418e-05	1590	14	GPR68
cg07063068	-0.21424	0.0446715	1.7958e-06	0.00772722	0.00404722	0.0564435	-0.000665209	0.00661465	0.919921	1588	14	GPR68
cg10814005	-0.223835	0.0282041	4.57355e-15	0.000891898	0.00236642	0.706311	-0.000278929	0.00366144	0.939295	1577	14	GPR68
cg20303561	-0.105196	0.025253	3.33355e-05	0.00571102	0.00191895	0.00297232	-0.00544332	0.00280429	0.0526071	1589	14	CCDC88C
cg05284742	-0.18144	0.0154432	2.02883e-30	-0.00791965	0.00139425	1.65341e-08	-0.00611387	0.00225229	0.00678478	1574	14	ITPK1
cg09247392	-0.0869164	0.015773	4.26534e-08	0.0058092	0.00143971	5.77514e-05	0.00318768	0.00236269	0.177669	1584	14	ASB2
cg20902353	-0.0710559	0.0134865	1.60604e-07	-0.00129441	0.00115679	0.263358	-0.000540166	0.0018274	0.767619	1582	14	ASB2
cg06819357	0.148423	0.0256399	9.21943e-09	0.000227538	0.00183665	0.901424	0.00315671	0.00260608	0.226153	1589	14	TECPR2
cg26242531	0.171445	0.0174499	5.67253e-22	-0.00162395	0.00139153	0.24341	-0.00648566	0.00210313	0.00211641	1587	14	ZFYVE21
cg14977938	0.18827	0.0229954	7.35129e-16	0.000446804	0.00161717	0.782372	0.000463275	0.00227928	0.838989	1588	14	ZFYVE21
cg19838043	0.151956	0.0226125	2.94311e-11	-0.00124242	0.00154805	0.422371	-0.0028155	0.00215193	0.191136	1590	14	ZFYVE21
cg18991417	0.115808	0.0213661	7.16275e-08	-0.00925301	0.00173178	1.07338e-07	0.000525017	0.00262859	0.841741	1584	14	14q32.33
cg01836137	0.124652	0.0204747	1.57413e-09	-0.00528805	0.00144839	0.000271926	-0.00742799	0.00203175	0.000273652	1568	14	INF2
cg13578465	0.272143	0.0410232	5.49783e-11	-0.00498136	0.00216994	0.0218851	-0.00929044	0.00277715	0.00086146	1583	14	INF2
cg27286011	0.122041	0.0234947	2.44707e-07	-0.00491813	0.00164453	0.00283742	-0.00372494	0.00230832	0.106993	1589	14	INF2
cg11730703	0.245478	0.0371664	6.34394e-11	-0.00945844	0.00238917	7.96371e-05	-0.00891895	0.00323791	0.00601479	1585	14	INF2
cg26151910	-0.146382	0.0274023	1.069e-07	-0.00193991	0.00257405	0.451202	0.0045631	0.00433317	0.292637	1584	14	ADSSL1
cg00808648	0.0880691	0.0153514	1.16515e-08	-0.00644312	0.00151363	2.2276e-05	-0.00458116	0.00262512	0.0813581	1588	14	PACS2
cg01513913	-0.131747	0.0214616	1.18819e-09	-0.00331136	0.00133994	0.0136016	-0.000849229	0.00180598	0.638322	1579	14	14q32.33
cg13074055	-0.287257	0.0522698	4.76785e-08	-0.00121526	0.00417376	0.770972	0.00819151	0.00632117	0.195413	1544	14	14q32.33
cg23594345	-0.22574	0.0395569	1.4796e-08	-0.00366113	0.00279871	0.191057	-0.00295671	0.00394362	0.453633	1588	14	14q32.33
cg01208318	-0.258025	0.038357	2.8876e-11	0.000895342	0.0023801	0.706851	-0.00610435	0.003165	0.0541313	1585	14	14q32.33
cg19847577	0.133001	0.0247582	9.59521e-08	0.00832801	0.00161786	3.06679e-07	-0.000412107	0.00219961	0.851432	1588	15	APBA2
cg25292882	-0.118558	0.0326075	0.000286526	0.00412378	0.0031649	0.192817	0.00403549	0.00541805	0.456599	1586	15	15q14
cg03316752	-0.13176	0.0344768	0.000138441	-0.00558279	0.00319987	0.081277	0.00036098	0.0052696	0.945403	1557	15	FSIP1
cg20059928	-0.217307	0.0322502	2.78036e-11	0.00200406	0.00170358	0.239693	0.000728275	0.00217132	0.737408	1589	15	15q15.1
cg26844633	-0.171948	0.0336228	3.59738e-07	-0.00579086	0.00307208	0.0596505	0.00422682	0.00502824	0.400819	1582	15	15q15.1
cg07306253	0.0853473	0.0162225	1.65349e-07	0.00307244	0.00152456	0.0440793	-0.00993417	0.00254549	0.000103341	1574	15	DNAJC17
cg23198793	0.119885	0.0234231	3.57288e-07	0.00176725	0.00192363	0.358416	0.000713113	0.00295607	0.809435	1578	15	CAPN3
cg15022400	-0.111839	0.0218105	3.42132e-07	-0.0309874	0.00170614	5.22471e-66	-0.0118631	0.0025343	3.36759e-06	1586	15	TRIM69
cg27332104	0.12381	0.0198015	5.53715e-10	-0.00653488	0.00167937	0.000104819	-0.00357901	0.00259031	0.167474	1547	15	15q21.2
cg10403394	0.318712	0.0481181	5.80809e-11	-0.0029026	0.00266498	0.276313	0.00255012	0.00345213	0.460308	1582	15	TPM1
cg19459791	0.15213	0.0270748	2.3941e-08	0.00970456	0.00210622	4.4673e-06	0.00281685	0.00312057	0.366978	1586	15	15q22.31
cg03489965	0.144665	0.0290293	7.21641e-07	-0.00211526	0.00214439	0.32411	0.00322461	0.00309073	0.297123	1590	15	LOC390594
cg06369322	-0.0946839	0.0145274	1.0254e-10	0.0174698	0.00122756	6.70517e-43	0.00212957	0.00191273	0.265893	1588	15	CCDC33
cg18335991	-0.10139	0.0178623	1.69059e-08	0.00654555	0.00156664	3.13274e-05	-0.00572191	0.0025085	0.0228157	1581	15	SEMA7A
cg00310412	-0.142492	0.0179335	5.02348e-15	0.000315763	0.00114931	0.783561	-0.0039336	0.00155506	0.011617	1590	15	SEMA7A
cg11152412	-0.1345	0.0244058	4.23211e-08	-0.00841305	0.0022727	0.000223037	-0.00157836	0.00380131	0.678097	1580	15	EDC3
cg12101586	-0.181914	0.0478938	0.000154128	0.00451899	0.00306015	0.140007	-0.00674961	0.00413644	0.103133	1589	15	CYP1A1
cg18092474	-0.137489	0.0431466	0.00148384	0.00585378	0.00261007	0.0250942	-0.00891324	0.00346058	0.0101864	1588	15	CYP1A1
cg23161492	-0.306272	0.0323945	2.27586e-20	-0.00298668	0.00187874	0.112168	-0.00996415	0.0024617	5.68753e-05	1587	15	ANPEP
cg05194346	0.224492	0.0290194	2.38231e-14	-0.0084199	0.00193244	1.42678e-05	0.00956283	0.00266806	0.0003594	1580	15	15q26.3
cg03004371	0.188324	0.0373683	5.52142e-07	0.00700618	0.0023056	0.00242701	0.00384626	0.00308047	0.212189	1585	15	ALDH1A3
cg03660377	-0.206636	0.0371876	3.3263e-08	0.0259926	0.00325835	3.24166e-15	0.00379593	0.00522399	0.467668	1570	16	AXIN1
cg09465703	-0.241291	0.0518442	3.65238e-06	-0.00409673	0.0036285	0.259092	-0.00627243	0.00508795	0.218021	1588	16	JMJD8
cg01207684	-0.335549	0.0429651	1.2468e-14	-0.0155447	0.00337121	4.39545e-06	-0.00440829	0.00502951	0.381037	1584	16	ADCY9
cg08118908	0.177994	0.0330173	8.24457e-08	0.00126513	0.00299113	0.672392	-0.00239301	0.00488884	0.624636	1583	16	NDE1
cg06321596	-0.122976	0.0280423	1.25892e-05	-0.000233757	0.00222086	0.916189	-0.00381919	0.0033227	0.25073	1589	16	XYLT1
cg04359840	-0.115546	0.0225764	3.61216e-07	-0.000472311	0.00171179	0.782655	-0.00520084	0.0025052	0.0382179	1587	16	XYLT1
cg09099830	-0.233211	0.0218373	2.40598e-25	0.000908274	0.00143774	0.527674	0.000294336	0.00195984	0.880659	1585	16	ITGAL
cg16391678	-0.164935	0.0171583	3.29636e-21	0.00963972	0.00154426	5.80458e-10	0.00189221	0.00251226	0.451566	1588	16	ITGAL
cg04716530	-0.174542	0.0216748	1.75504e-15	0.00798825	0.00196769	5.2058e-05	7.13195e-05	0.00320507	0.982253	1586	16	ITGAL
cg16519923	-0.148433	0.0184387	1.76241e-15	0.00820342	0.00172008	2.0577e-06	-0.00271292	0.00284097	0.339917	1575	16	ITGAL
cg06235438	-0.143733	0.0201098	1.39409e-12	0.0158638	0.0019311	5.13258e-16	-0.00112531	0.00328564	0.732072	1586	16	ITGAL
cg06972908	-0.117046	0.0182322	1.84472e-10	0.0174437	0.00174895	1.2778e-22	-0.00254283	0.00296013	0.390588	1583	16	ITGAL
cg07069636	-0.0809746	0.0154496	1.89873e-07	0.00177943	0.00116444	0.12672	-0.00162621	0.00169538	0.33776	1582	16	16p11.2
cg11824827	0.112609	0.0204712	4.65289e-08	0.0135942	0.00155679	7.52078e-18	0.000130619	0.00227769	0.954284	1582	16	ZNF668
cg10380221	0.15294	0.0257418	3.80936e-09	0.0128454	0.00178924	1.19299e-12	-0.00938497	0.00249425	0.000180853	1585	16	ZNF668
cg04701628	0.0637931	0.0137373	3.73028e-06	-0.0127375	0.00131158	1.43505e-21	-0.00190365	0.00222007	0.391444	1587	16	16p11.2
cg13247990	0.0849025	0.0144453	5.21017e-09	0.00724455	0.00133149	6.32764e-08	-0.00565685	0.00219878	0.0102752	1572	16	MYLK3
cg01951879	0.148073	0.03126	2.41427e-06	-0.002508	0.00262757	0.340008	-0.00406788	0.00410437	0.321939	1582	16	16q12.2
cg09109520	0.171395	0.030127	1.66045e-08	0.0120196	0.00192007	5.31623e-10	-0.00472896	0.00258995	0.0682472	1588	16	GPR56
cg13500388	-0.120192	0.019049	3.80153e-10	-0.00151091	0.00170088	0.374537	-0.00573768	0.0027265	0.0356657	1570	16	CBFB
cg05969150	0.0872492	0.01389	4.73469e-10	-0.00171549	0.00107309	0.110142	-0.000695121	0.00157871	0.659838	1586	16	ZFHX3
cg27262054	-0.178633	0.0260776	1.2301e-11	0.00652404	0.00181641	0.000341043	-0.00284909	0.00254864	0.263959	1583	16	ZFHX3
cg05183538	0.233778	0.0325348	1.11558e-12	0.0139678	0.00283396	9.31898e-07	-0.0106721	0.00451721	0.0183932	1584	16	ZFPM1
cg01062937	0.098501	0.0130165	7.25832e-14	0.00599869	0.00109156	4.66844e-08	-0.0027923	0.00170875	0.102639	1570	16	ZFPM1
cg18404811	0.0849495	0.0193484	1.21849e-05	-0.00550285	0.00174611	0.00166086	-0.00796007	0.00283213	0.00506886	1586	17	17p13.3
cg25212453	-0.279192	0.0408323	1.25658e-11	0.00352803	0.00338244	0.297121	0.00930195	0.00522561	0.075459	1569	17	SLC43A2
cg21949830	-0.189191	0.0346025	5.46055e-08	-0.0041014	0.00301971	0.174628	0.0141407	0.00477917	0.00318237	1581	17	SLC43A2
cg24173182	0.157127	0.0226047	5.92921e-12	-0.00294578	0.0018383	0.109299	-0.00855482	0.00277968	0.00216251	1557	17	HIC1
cg00911794	0.258165	0.0346299	1.68054e-13	0.0066445	0.00288124	0.0212571	-0.00255485	0.00444133	0.565297	1589	17	HIC1
cg11690578	-0.115095	0.0258844	9.48362e-06	-0.00110112	0.00218989	0.615174	-1.56597e-05	0.00341508	0.996343	1590	17	SMTNL2
cg04521626	0.0892644	0.0139873	2.42995e-10	-0.00239233	0.00122215	0.0505029	-0.00341711	0.00193886	0.0784006	1580	17	PLD2
cg20438687	-0.100284	0.0238492	2.81564e-05	-0.00376466	0.00181453	0.0382077	-0.00266012	0.00263467	0.312977	1583	17	MINK1
cg04970434	0.120052	0.0213404	2.30284e-08	-0.00362188	0.00168247	0.0315213	0.000618318	0.00251323	0.805728	1588	17	GP1BA
cg09975715	0.0925322	0.0258537	0.000356542	9.89824e-05	0.0023984	0.967087	-0.00303304	0.00397819	0.446041	1586	17	MYH10
cg25921609	0.134792	0.0262195	3.17894e-07	-0.0148502	0.00212312	4.20524e-12	-0.00252368	0.00323332	0.435318	1586	17	MYH10
cg05460226	-0.140753	0.023568	3.02403e-09	0.00652424	0.00201309	0.00122093	-0.00755723	0.00316432	0.0171653	1588	17	PIK3R5
cg23842572	0.113336	0.0206707	5.00233e-08	0.0251774	0.00180335	1.91245e-41	0.00216783	0.00287522	0.451092	1583	17	MPRIP
cg09607043	0.147135	0.0284827	2.75822e-07	0.0136049	0.00254062	1.00864e-07	0.0015685	0.0040961	0.70188	1581	17	17p11.2
cg01429256	0.0564346	0.00970619	7.50951e-09	-0.00224969	0.000911959	0.0137586	-0.00356057	0.00152716	0.0199826	1582	17	RAI1
cg05508862	0.110052	0.0160028	1.01564e-11	-0.00359093	0.0011564	0.00194251	-0.00415424	0.00164761	0.0118886	1585	17	SLC5A10
cg13832201	-0.110854	0.0207869	1.16367e-07	-0.00177556	0.00155219	0.252871	-0.00446428	0.00225269	0.0478595	1580	17	MAPK7
cg16062877	-0.0844124	0.0131186	1.69254e-10	0.000370903	0.00122417	0.76195	0.00239808	0.0020469	0.241727	1574	17	KSR1
cg19572487	-0.336061	0.0244219	2.51106e-40	0.00434265	0.00211663	0.0403967	-0.00932023	0.00335726	0.00563221	1578	17	RARA
cg26878655	-0.102726	0.0210103	1.12057e-06	0.00326478	0.00208675	0.117943	0.00229113	0.00361028	0.525865	1583	17	RARA
cg11094248	-0.0944264	0.0143433	6.39559e-11	-0.0140319	0.00138545	3.03862e-23	0.00272956	0.00236527	0.248847	1585	17	RARA
cg16276850	0.0995641	0.0147949	2.46385e-11	0.00478043	0.00138701	0.000585893	-0.00443721	0.0023146	0.0556032	1588	17	RARA
cg05824218	0.109339	0.0122375	1.27346e-18	-0.0048645	0.00111847	1.47189e-05	-0.00413823	0.00183602	0.0244776	1585	17	RARA
cg10062919	-0.0925949	0.0113746	9.614e-16	-0.000783769	0.000916885	0.392806	-0.0017126	0.00138908	0.217979	1586	17	RARA
cg04956244	0.0923347	0.0119056	1.7145e-14	-0.00181044	0.00106967	0.0907832	0.0005253	0.00173919	0.762704	1579	17	RARA
cg16255816	-0.132439	0.0225925	5.99421e-09	0.00628261	0.0016614	0.00016313	-0.00214222	0.00238857	0.370073	1556	17	HAP1
cg20810975	0.0942529	0.0133177	2.29458e-12	-0.00743456	0.00125834	4.4158e-09	-0.00650579	0.00211792	0.00220225	1588	17	ITGA2B
cg25809905	0.231286	0.0313614	3.49599e-13	-0.00185786	0.0018366	0.311952	0.000795157	0.00241603	0.742158	1581	17	ITGA2B
cg23673974	0.0680401	0.0164431	3.70545e-05	0.00561125	0.00157881	0.00039303	0.000365507	0.00269135	0.892008	1587	17	TBKBP1
cg19325791	0.114779	0.0237571	1.50489e-06	-0.0089823	0.00220807	5.02824e-05	0.0040434	0.00367896	0.272078	1578	17	17q21.31
cg07465627	-0.120852	0.0181294	3.81614e-11	-0.000846002	0.00162958	0.603741	-0.000654055	0.00264371	0.804663	1580	17	STXBP4
cg00968616	0.0770717	0.0153681	6.02771e-07	-0.0164567	0.00133417	3.49697e-33	0.00278953	0.00211731	0.188058	1583	17	CUEDC1
cg15212295	-0.160834	0.0219616	4.01347e-13	0.0172254	0.00207188	2.29737e-16	0.00781076	0.00348454	0.0252668	1589	17	PRKCA
cg02186444	0.131442	0.0186448	3.14072e-12	-0.000361614	0.00133135	0.785961	-0.000932541	0.00188976	0.621819	1583	17	ARMC7
cg07251887	-0.131871	0.0173149	5.19579e-14	-0.000597137	0.00140464	0.670819	-0.0108376	0.00214234	5.26408e-07	1587	17	LOC100130933
cg00871371	-0.0705477	0.0173942	5.3081e-05	0.00998692	0.00143097	4.66766e-12	0.00142322	0.00219075	0.51611	1588	17	2009-09-01
cg00324097	-0.0800059	0.0128826	7.05979e-10	0.0120356	0.00113174	2.08872e-25	0.00107633	0.00181026	0.552304	1588	17	2009-09-01
cg06513247	-0.0674559	0.0121459	3.35521e-08	0.0147972	0.00109528	4.61006e-39	0.000964149	0.00178499	0.58925	1588	17	2009-09-01
cg13020466	0.0890738	0.0194802	5.23641e-06	-0.0041352	0.0018237	0.0235237	-0.00304457	0.00305188	0.318777	1584	17	PGS1
cg25512107	-0.3359	0.0371517	4.62387e-19	-0.00501987	0.00371504	0.176867	0.0367354	0.00652297	2.47835e-08	1576	17	RPTOR
cg18758622	0.0932118	0.0141106	5.6901e-11	-0.00406703	0.00125291	0.00119939	-0.00556988	0.00202004	0.0059647	1587	17	BAIAP2
cg04806562	0.0869092	0.0132158	6.89544e-11	0.00575276	0.00117362	1.0668e-06	-0.00179883	0.00188857	0.341144	1588	17	TEX19
cg06459104	-0.225395	0.0472204	2.09885e-06	-0.000652472	0.00245412	0.79039	-0.00732003	0.00312333	0.0193455	1584	18	EPB41L3
cg01017464	-0.144745	0.0301797	1.82824e-06	-0.00415762	0.0022744	0.0677748	0.000159088	0.00331196	0.961701	1589	18	SNORD58A
cg02775417	-0.276462	0.0507512	5.97455e-08	0.0125681	0.00494972	0.0112301	-0.00290116	0.00853096	0.73389	1583	19	FGF22
cg00073090	-0.166398	0.0169313	5.35347e-22	-0.00184686	0.0013723	0.178592	0.00102414	0.00209261	0.62469	1588	19	19p13.3
cg02917867	-0.0765634	0.0182822	3.02452e-05	0.00122988	0.00144146	0.393695	-0.00159219	0.00215484	0.460195	1572	19	19p13.3
cg15187398	-0.160841	0.0281649	1.48066e-08	0.00499088	0.00172381	0.00385808	-0.0102682	0.00229083	8.50945e-06	1581	19	MOBKL2A
cg07381806	-0.320867	0.0406892	6.53831e-15	0.000232328	0.00361881	0.948821	-0.00705387	0.00582996	0.226674	1554	19	MOBKL2A
cg00378510	-0.3032	0.0495139	1.34159e-09	0.000481754	0.00262273	0.854295	0.00472462	0.00334499	0.15822	1590	19	LINGO3
cg01294327	-0.331661	0.0481474	1.04967e-11	-0.00181628	0.00225127	0.419976	0.00186282	0.00279997	0.506055	1589	19	LINGO3
cg21869609	-0.404114	0.0650625	8.01494e-10	-0.00118405	0.00292232	0.685433	0.00271528	0.00359295	0.450043	1584	19	LINGO3
cg00835193	-0.221206	0.0351653	4.53825e-10	0.00225617	0.00254206	0.374955	-0.000503693	0.00362312	0.889469	1589	19	LINGO3
cg14074174	-0.0764728	0.0160052	2.0149e-06	-0.000678333	0.00109641	0.536235	-0.000465685	0.00151941	0.759313	1581	19	SNAPC2
cg11621113	-0.105597	0.0189876	3.29397e-08	0.00285163	0.00150525	0.0583815	-0.00738188	0.00225448	0.0011055	1588	19	MORG1
cg17971600	0.0439381	0.00964776	5.69911e-06	-0.00315888	0.000917667	0.0005952	-0.00304	0.00155525	0.0509747	1584	19	RASAL3
cg04324758	-0.27069	0.0470133	1.06164e-08	0.00183592	0.00407136	0.652109	0.00953943	0.00638946	0.135838	1580	19	KLF2
cg05906166	-0.232143	0.0471624	1.00549e-06	0.0096089	0.00260338	0.000234037	-0.00522132	0.00335346	0.119876	1588	19	KLF2
cg11390978	-0.312002	0.0467213	3.40752e-11	0.00221303	0.0046019	0.630674	0.00894321	0.00797499	0.262455	1583	19	SIN3B
cg14712058	-0.223468	0.025464	5.58597e-18	0.0208181	0.00206739	4.90088e-23	0.00126452	0.00313882	0.687158	1587	19	SIN3B
cg03636183	-0.715999	0.0265415	2.27617e-122	-0.0043376	0.00177299	0.014563	-0.00339431	0.00243828	0.164295	1586	19	F2RL3
cg15159987	-0.176603	0.015321	2.48138e-29	0.0146559	0.0013126	9.77756e-28	0.00359557	0.0020618	0.0815707	1584	19	CPAMD8
cg23973524	0.266939	0.0266146	1.24613e-22	-0.00429976	0.00162405	0.00821444	-0.00100382	0.0021589	0.642083	1590	19	CRTC1
cg21473814	0.221648	0.0260106	4.94475e-17	-0.00725017	0.00193745	0.000190378	0.0024409	0.00280397	0.384287	1586	19	CRTC1
cg06151964	0.082318	0.0138477	3.50959e-09	-0.00231503	0.00126236	0.0668971	-0.00112802	0.00207521	0.586892	1581	19	HPN
cg11902728	0.141304	0.017112	3.63759e-16	-0.00506256	0.0014645	0.000563655	-0.0052926	0.00229993	0.0216426	1589	19	MAG
cg12406027	-0.0788623	0.0170902	4.40346e-06	-0.000203604	0.00121566	0.867015	0.000681335	0.00171973	0.692076	1580	19	PAK4
cg12076915	-0.128628	0.0276503	3.72366e-06	0.00113404	0.0016707	0.49741	-0.00487511	0.00221353	0.027925	1590	19	19q13.2
cg11666770	-0.517235	0.081305	3.15517e-10	0.00277596	0.00373031	0.456946	-0.00333093	0.00461402	0.470561	1590	19	19q13.2
cg00533649	-0.123753	0.0206945	3.12353e-09	-0.0013491	0.00118845	0.25654	0.00235098	0.00154888	0.12946	1579	19	19q13.2
cg07626482	-0.0973862	0.017609	3.99547e-08	-0.000364007	0.00124546	0.77013	-0.00292133	0.00176302	0.0979283	1587	19	SLC1A5
cg19046189	0.0634651	0.0126629	6.12632e-07	0.000622838	0.00110137	0.571823	-0.000567444	0.00174637	0.745322	1586	19	HSD17B14
cg03707168	-0.200582	0.0235197	4.25934e-17	-0.0198581	0.00193034	6.15502e-24	-0.00927832	0.00296527	0.00181955	1588	19	PPP1R15A
cg11701312	-0.0866435	0.0133126	1.12149e-10	-0.000525783	0.0010221	0.607048	-0.00169747	0.00150621	0.260095	1588	19	RPS5
cg11436113	-0.100047	0.0173879	1.08773e-08	-0.00281767	0.001496	0.0598544	0.00369247	0.00236218	0.118421	1588	20	20p11.23
cg16201146	-0.103167	0.0212504	1.3474e-06	0.0024606	0.0018715	0.188813	-0.00257129	0.00300899	0.393072	1585	20	20p11.23
cg20244340	-0.202329	0.0298953	2.24835e-11	0.00090383	0.00168724	0.592279	-4.42432e-06	0.00219681	0.998394	1587	20	SLC24A3
cg00699986	0.116905	0.0205969	1.67561e-08	-0.0192091	0.00190744	5.0762e-23	-0.00332935	0.00317799	0.295133	1574	20	VSX1
cg13127741	-0.0788735	0.0199616	8.24832e-05	0.00798371	0.00150608	1.35133e-07	-0.00431931	0.00219869	0.0498334	1586	20	COMMD7
cg19593285	-0.217214	0.0272883	3.66074e-15	0.0080388	0.00241644	0.000902984	0.0081258	0.00387063	0.0361085	1581	20	E2F1
cg16151538	0.0945054	0.0181179	2.08514e-07	-0.0145223	0.00177259	6.13675e-16	-0.00328492	0.00304679	0.281292	1585	20	TRPC4AP
cg17566560	-0.0791612	0.0198987	7.27127e-05	0.00513357	0.00199737	0.0102805	0.00382383	0.00351299	0.276714	1582	20	DLGAP4
cg12303084	-0.146358	0.0213234	1.12285e-11	-0.000241318	0.0014983	0.872071	-0.00283606	0.00210724	0.17874	1587	20	ZMYND8
cg07339236	-0.341438	0.0389921	5.47938e-18	-0.00975174	0.00373201	0.00907915	-0.0141515	0.0063364	0.0258032	1587	20	ATP9A
cg16178855	0.105546	0.015412	1.18393e-11	-0.000650603	0.00123552	0.598571	0.0023293	0.00186439	0.211905	1589	20	PMEPA1
cg22100563	0.125771	0.0252955	7.47043e-07	-0.0228869	0.00229286	1.14707e-22	-0.00442293	0.00373174	0.236294	1576	20	TPD52L2
cg27598208	-0.123356	0.0225657	5.51564e-08	-0.00160986	0.00189238	0.395085	0.0052879	0.00294669	0.0731145	1585	20	TCEA2
cg00871610	-0.0996458	0.022248	8.2203e-06	-0.000699838	0.00175481	0.690096	-0.00735258	0.00262767	0.00526671	1589	21	MIR802
cg06595162	-0.119286	0.0192809	8.39776e-10	0.00156649	0.00154085	0.309511	-0.00509442	0.0023145	0.0280229	1586	21	NCRNA00114
cg15892280	-0.0570173	0.0120159	2.30671e-06	-0.00584365	0.00107526	6.53649e-08	-0.00323876	0.00173665	0.0625633	1568	21	ETS2
cg23110422	-0.254961	0.0337268	7.61404e-14	0.00137438	0.00293491	0.639656	-0.00904419	0.00461736	0.0505011	1570	21	ETS2
cg26486070	-0.132685	0.0279808	2.40379e-06	-0.00398905	0.00187779	0.0338385	-0.00270747	0.002579	0.29413	1579	22	GGT1
cg23441210	0.0915221	0.0202765	6.86945e-06	-0.00646849	0.00202187	0.00141254	-0.00293068	0.00353603	0.407465	1570	22	FOXRED2
cg02532700	-0.255777	0.0327162	1.29435e-14	-0.0172948	0.00218732	5.77395e-15	-0.00931499	0.00301069	0.00204621	1589	22	NCF4
cg02556928	-0.128512	0.0317435	5.52337e-05	-0.0116622	0.00216766	8.85613e-08	-0.00384948	0.0030099	0.201296	1590	22	CSF2RB
cg20066188	-0.266764	0.0348154	4.5393e-14	0.0101531	0.00176838	1.21651e-08	-0.00155289	0.00223305	0.487003	1587	22	CYTH4
cg01127300	-0.18501	0.0277842	4.59982e-11	-0.00424807	0.00156269	0.00665824	-0.00290802	0.00202915	0.152224	1588	22	22q13.1
cg04673446	0.0778778	0.0160454	1.34291e-06	0.00238457	0.00154342	0.122593	0.00288063	0.00261367	0.270741	1586	22	MGAT3
cg26364091	-0.0937915	0.0163598	1.23989e-08	0.00124185	0.00132579	0.349087	-0.00164745	0.00201583	0.414028	1588	22	CHADL
